# Supplementary material for: Expression quantitative trait loci for PI3K/AKT pathway
Source: PubMed Central journal article supplement (PMC5228698; doi:10.1097/md.0000000000005817), 2017-01-10
Supplement: medi-96-e5817-s001.pdf [file medi-96-e5817-s001.pdf]

**Figure S1** Linkage disequilibrium (LD) blocks with nucleotide variants in proximity of association signals for gene expression of *COL4A1* and *COL4A2*. Pair-wise linkage disequilibrium estimate ( $r^2$ ) is presented in brightness. Red box indicates nucleotide variant with the most significant association within each LD block. Cytogenic location (A) 4q32.3, (B) 6q13.1, (C) 9p24.1, (D) 9q31.2 and (E) 22q11.22.

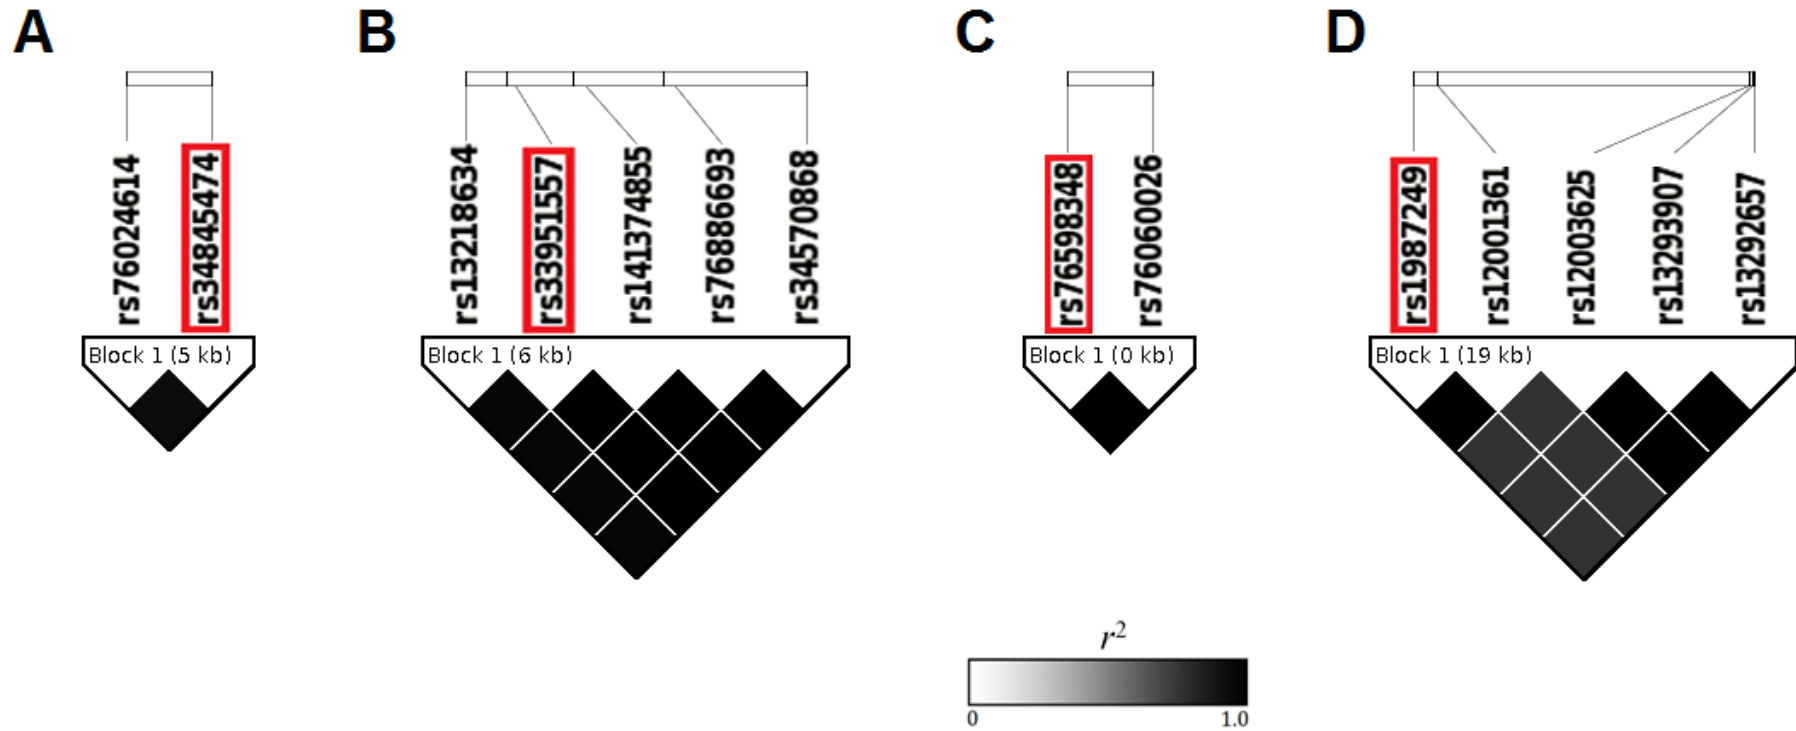

M

rs3747098  
rs8405  
rs2073725  
rs5996147  
rs14692667  
rs35317486  
rs57306165  
rs6225994  
rs34575077  
rs2266991  
rs2266993  
rs2266994  
rs3827308  
rs3827312  
rs3827313  
rs12628336  
rs11090146  
rs12484407  
rs12484878  
rs12628961  
rs12628728  
rs12628694  
rs12628708  
rs12628637  
rs34159908  
rs35340611  
rs4822130  
rs4822131  
rs4822132  
rs12484127  
rs5996169  
rs6002751  
rs11705416  
rs11704554  
rs57882020  
rs6002757  
rs6002758  
rs6002759  
rs6002761  
rs6002762  
rs4822137  
rs4822138  
rs4822139  
rs4820467  
rs4820468  
rs4820469  
rs6002772  
rs6002778  
rs6002779  
rs4822154  
rs6226018

Block: 1 (22 kb)

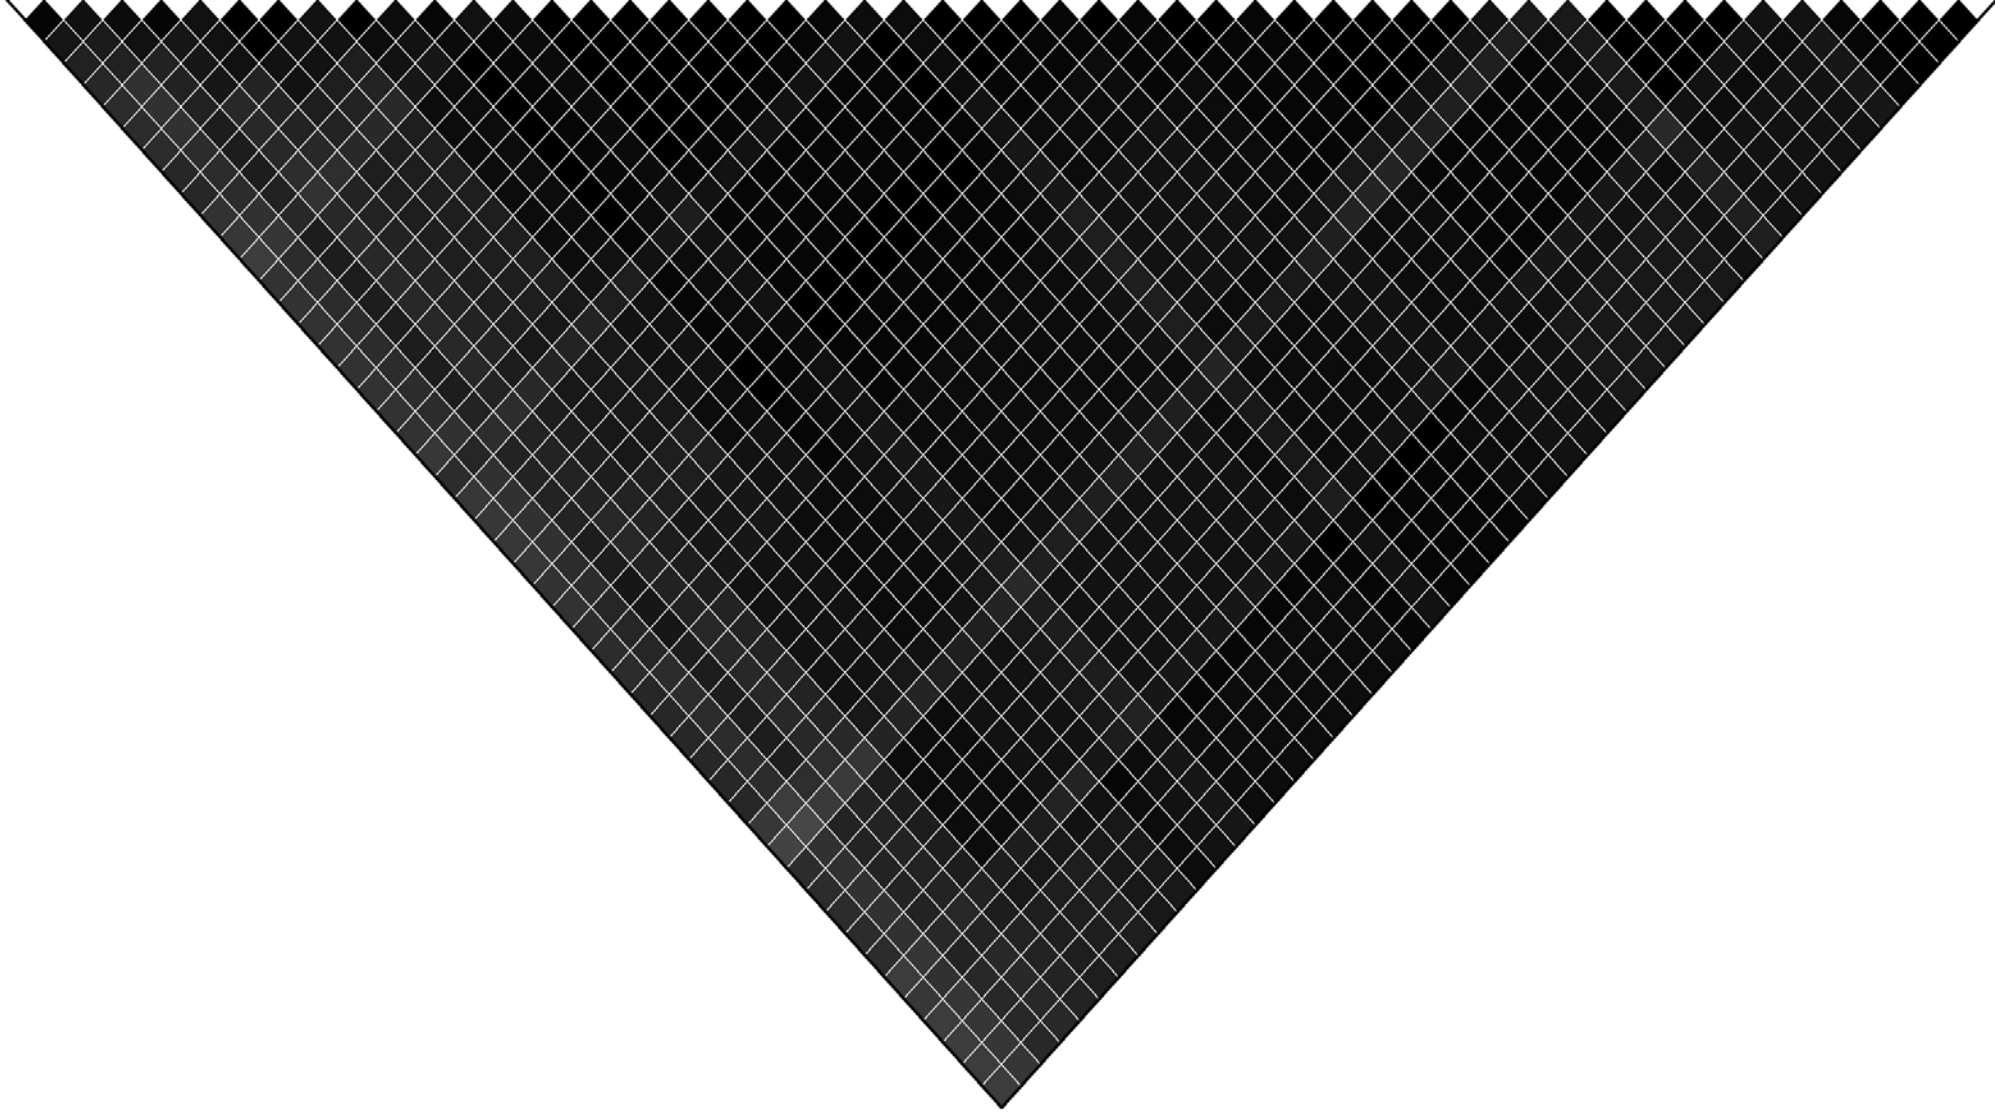

**Figure S2** Linkage disequilibrium (LD) blocks with nucleotide variants in proximity of association signals for gene expression of *COL4A5* and *COL4A6*. Pair-wise linkage disequilibrium estimate ( $r^2$ ) is presented in brightness. Red box indicates nucleotide variant with the most significant association within each LD block. The LD block in (E) includes two variants in boxes: rs7964807 was the most significant variant associated with expression of *COL4A5* and rs189351960 was the most significant variant associated with expression of *COL4A6*. Cytogenic location (A) 2p25.2, (B) 7q32.2, (C) 5q32, (D) 16q21, and (E) 12q21.1.

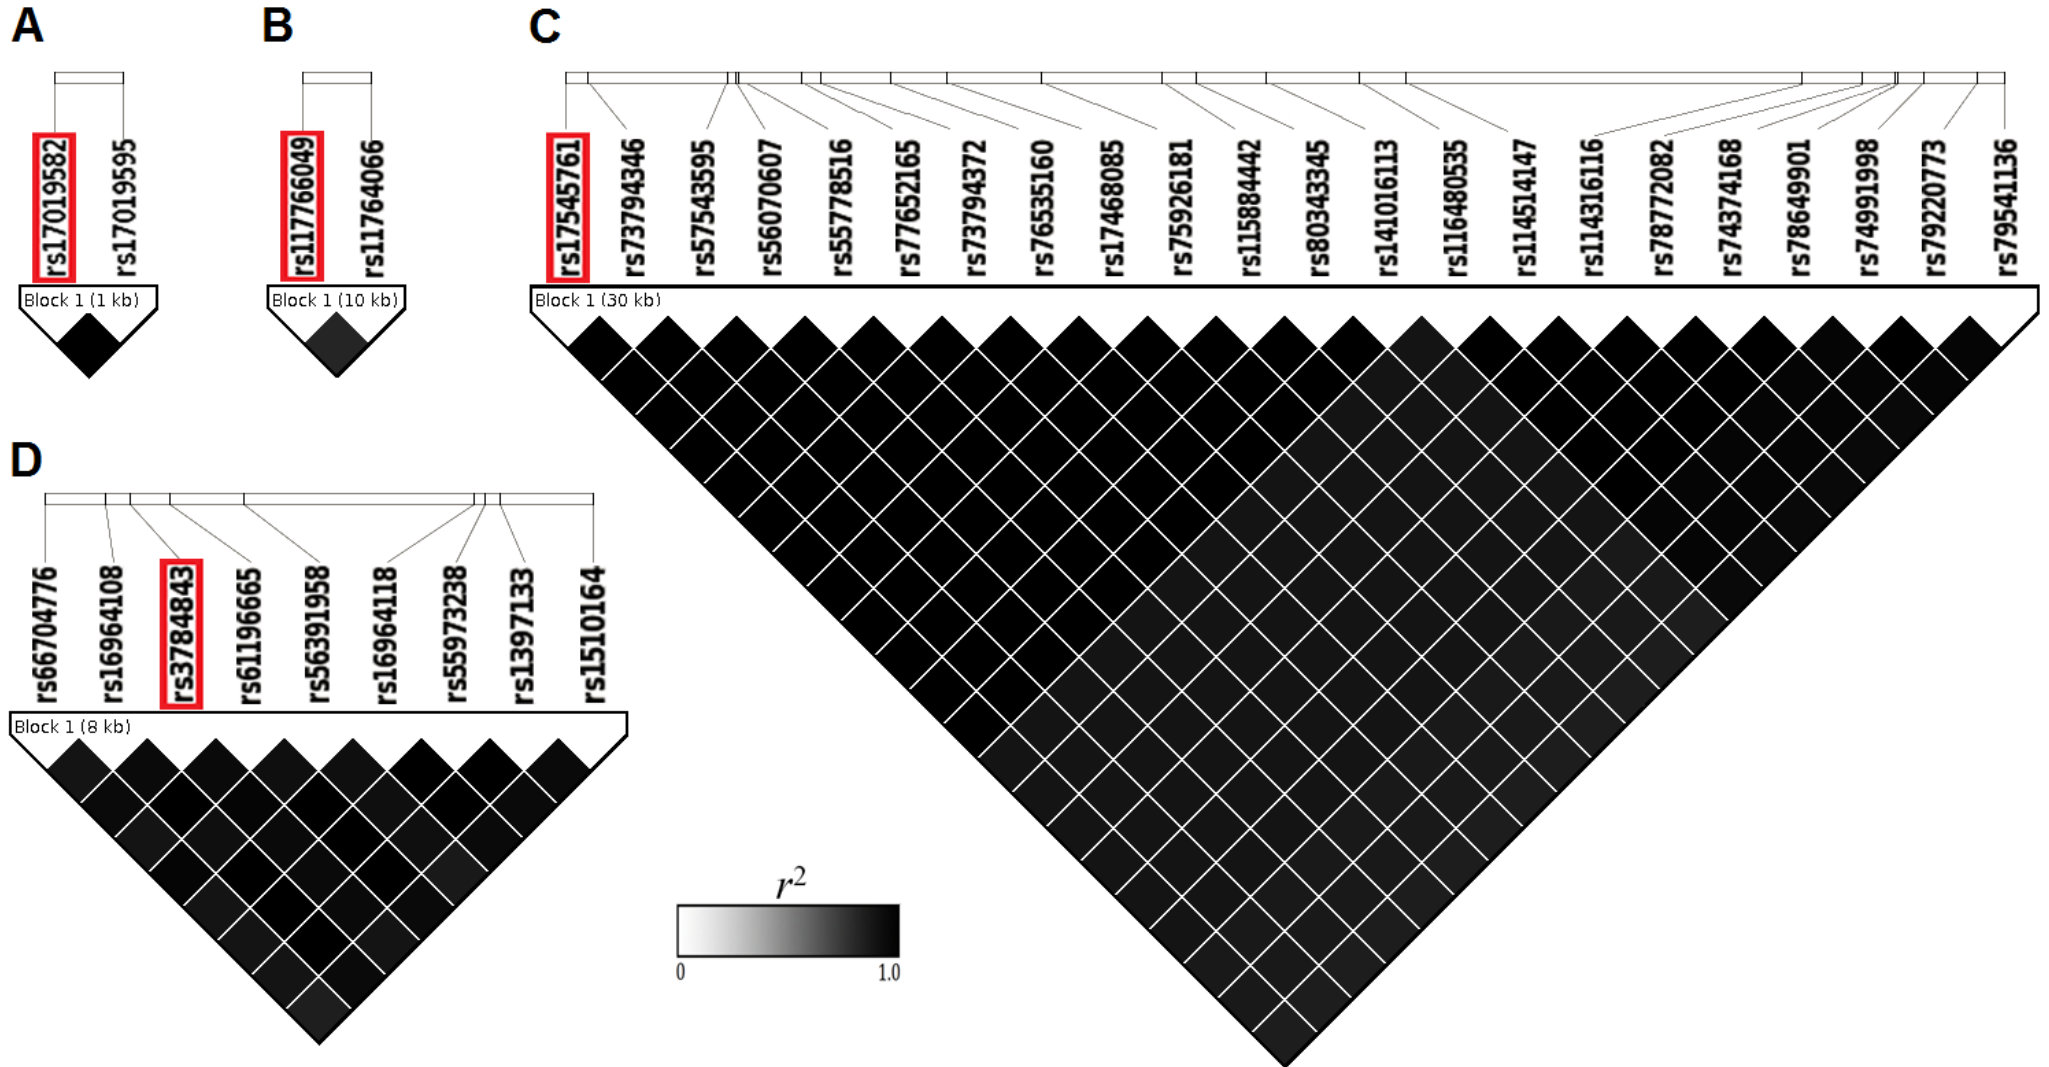

M

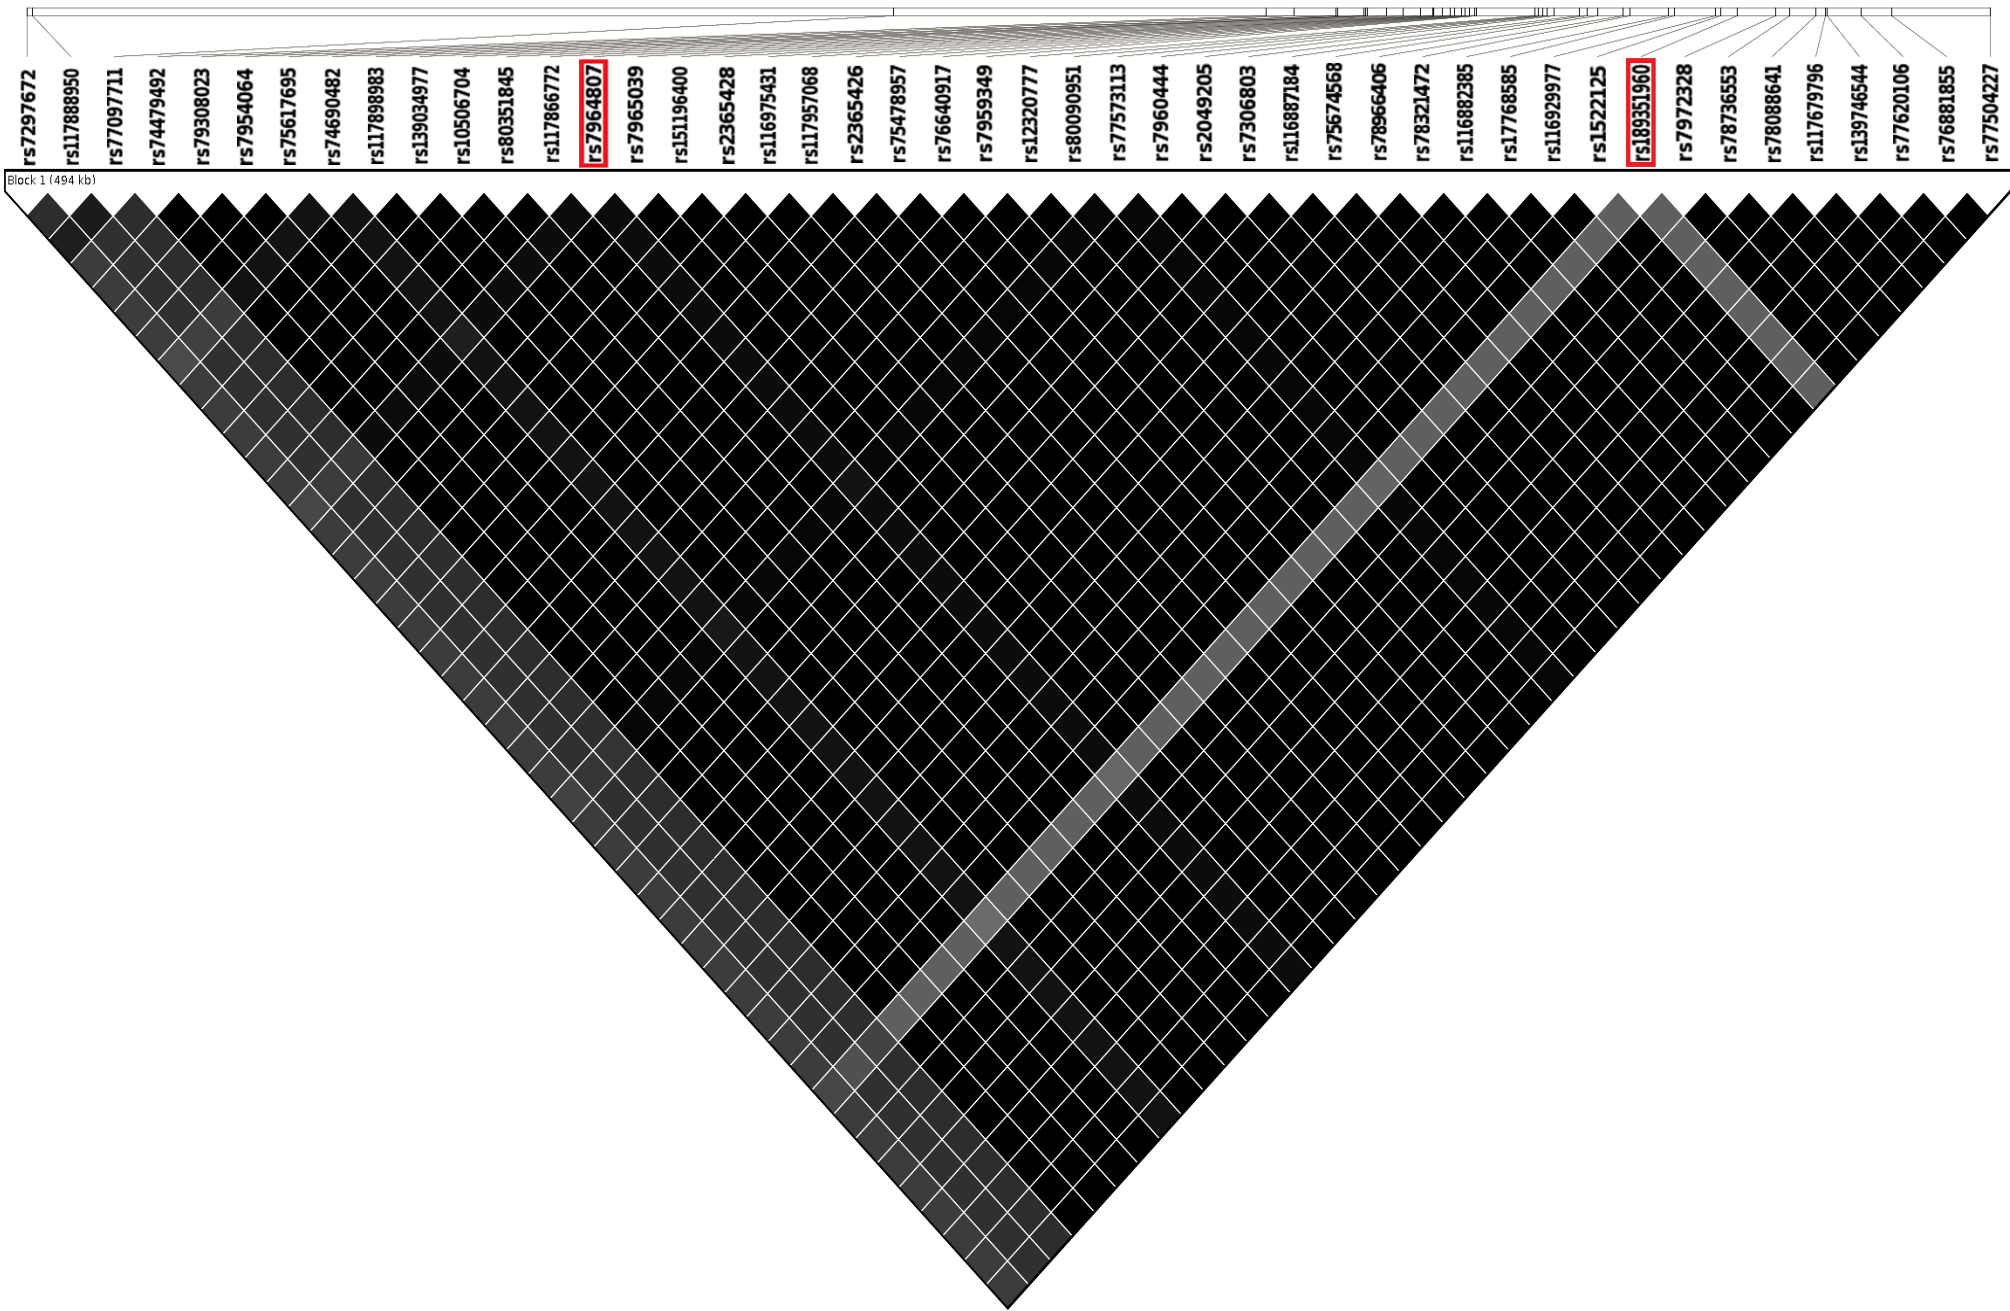

Block 1 (494 kb)

**Figure S3** Epistasis between nucleotide variants associated with expression of *COL4A2* (A, B, C, and D), and *COL4A5* (E). Epistatic effects with  $P < 1 \times 10^{-200}$  are presented. Value in each cell denotes mean estimate of RPKM for individuals with specific combined genotypes. A darker cell indicates a larger mean estimate.

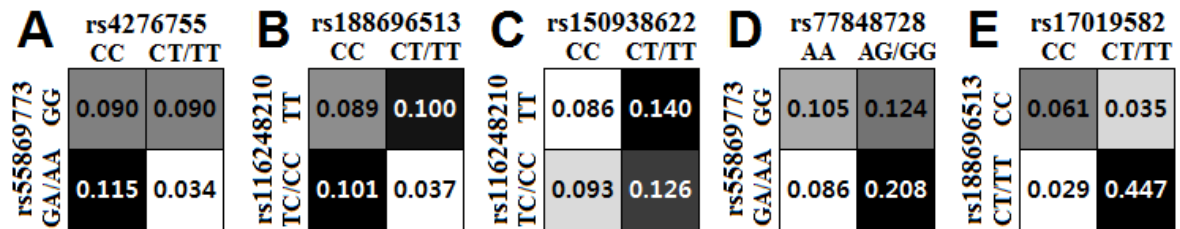

**Table S1** Nucleotide variants associated with expression of the genes involved in the PI3K/AKT pathway by a genome-wide association study ( $P < 5 \times 10^{-8}$ ).

| <i>Expressed Gene</i> | <i>SNV</i>  |            |                              |               |                       |                       |
|-----------------------|-------------|------------|------------------------------|---------------|-----------------------|-----------------------|
|                       | <i>ID</i>   | <i>Chr</i> | <i>Position</i> <sup>a</sup> | <i>Gene</i>   | $\beta$               | <i>P</i>              |
| <i>ATF4</i>           | rs61519868  | 5          | 59,855,364                   | Intergenic    | 21.48                 | $4.85 \times 10^{-8}$ |
|                       | rs150915887 | 8          | 94,915,864                   | Intergenic    | 29.54                 | $4.12 \times 10^{-8}$ |
|                       | rs12873072  | 13         | 102,309,754                  | <i>ITGBL1</i> | 29.49                 | $2.34 \times 10^{-8}$ |
|                       | rs139331134 | 14         | 20,442,676                   | Intergenic    | 29.83                 | $2.86 \times 10^{-9}$ |
|                       | rs10873097  | 14         | 20,446,556                   | Intergenic    | 29.20                 | $3.59 \times 10^{-9}$ |
|                       | rs113845735 | 14         | 20,454,230                   | Intergenic    | 29.83                 | $2.86 \times 10^{-9}$ |
|                       | rs112843116 | 14         | 20,455,388                   | Intergenic    | 26.99                 | $3.87 \times 10^{-8}$ |
|                       | rs117990005 | 14         | 20,455,906                   | Intergenic    | 29.83                 | $2.86 \times 10^{-9}$ |
|                       | rs72667632  | 14         | 20,461,839                   | Intergenic    | 29.83                 | $2.86 \times 10^{-9}$ |
|                       | rs72667634  | 14         | 20,464,780                   | Intergenic    | 29.83                 | $2.86 \times 10^{-9}$ |
|                       | rs72667636  | 14         | 20,467,477                   | Intergenic    | 29.83                 | $2.86 \times 10^{-9}$ |
|                       | rs72667637  | 14         | 20,468,104                   | Intergenic    | 29.83                 | $2.86 \times 10^{-9}$ |
|                       | rs72667638  | 14         | 20,468,749                   | Intergenic    | 29.83                 | $2.86 \times 10^{-9}$ |
|                       | rs72667639  | 14         | 20,469,029                   | Intergenic    | 29.83                 | $2.86 \times 10^{-9}$ |
|                       | rs72667641  | 14         | 20,469,971                   | Intergenic    | 29.83                 | $2.86 \times 10^{-9}$ |
| rs72667643            | 14          | 20,471,786 | Intergenic                   | 29.83         | $2.86 \times 10^{-9}$ |                       |
| <i>CCND1</i>          | rs187381186 | 7          | 2,662,189                    | Intergenic    | 9.76                  | $1.41 \times 10^{-8}$ |
|                       | rs11228599  | 11         | 69,026,286                   | Intergenic    | 7.40                  | $3.98 \times 10^{-8}$ |
|                       | rs7940107   | 11         | 69,027,770                   | Intergenic    | 7.59                  | $2.78 \times 10^{-8}$ |
|                       | rs7122516   | 11         | 69,029,009                   | Intergenic    | 7.59                  | $2.78 \times 10^{-8}$ |
|                       | rs7122786   | 11         | 69,029,210                   | Intergenic    | 7.59                  | $2.78 \times 10^{-8}$ |
|                       | rs11228600  | 11         | 69,029,424                   | Intergenic    | 7.59                  | $2.78 \times 10^{-8}$ |
|                       | rs11228602  | 11         | 69,029,827                   | Intergenic    | 7.59                  | $2.78 \times 10^{-8}$ |
|                       | rs72930263  | 11         | 69,030,206                   | Intergenic    | 7.59                  | $2.78 \times 10^{-8}$ |
|                       | rs72930267  | 11         | 69,030,990                   | Intergenic    | 7.59                  | $2.78 \times 10^{-8}$ |
|                       | rs74367143  | 11         | 69,031,273                   | Intergenic    | 7.59                  | $2.78 \times 10^{-8}$ |
|                       | rs12418263  | 11         | 69,031,698                   | Intergenic    | 7.59                  | $2.78 \times 10^{-8}$ |
|                       | rs10896454  | 11         | 69,033,016                   | Intergenic    | 7.59                  | $2.78 \times 10^{-8}$ |
|                       | rs10896455  | 11         | 69,035,337                   | Intergenic    | 7.59                  | $2.78 \times 10^{-8}$ |
|                       | rs10896456  | 11         | 69,035,585                   | Intergenic    | 7.59                  | $2.78 \times 10^{-8}$ |
|                       | <i>CDK6</i> | rs28592627 | 15                           | 31,327,398    | <i>TRPM1</i>          | 1.69                  |
| rs75969010            |             | 15         | 31,329,753                   | <i>TRPM1</i>  | 2.30                  | $2.26 \times 10^{-9}$ |
| rs28449259            |             | 15         | 31,331,353                   | <i>TRPM1</i>  | 1.62                  | $3.28 \times 10^{-8}$ |
| rs28535333            |             | 15         | 31,334,684                   | <i>TRPM1</i>  | 1.64                  | $2.29 \times 10^{-8}$ |
| <i>CDKN1A</i>         | rs75927735  | 15         | 86,169,103                   | <i>AKAP13</i> | 23.45                 | $3.59 \times 10^{-8}$ |
| <i>CHAD</i>           | rs62225420  | 22         | 34,167,980                   | <i>LARGE</i>  | 0.03                  | $2.65 \times 10^{-8}$ |
|                       | rs2267283   | 22         | 34,171,554                   | <i>LARGE</i>  | 0.03                  | $2.65 \times 10^{-8}$ |
|                       | rs2267284   | 22         | 34,172,783                   | <i>LARGE</i>  | 0.03                  | $2.65 \times 10^{-8}$ |
|                       | rs62225421  | 22         | 34,174,674                   | <i>LARGE</i>  | 0.03                  | $2.65 \times 10^{-8}$ |
|                       | rs62225423  | 22         | 34,174,927                   | <i>LARGE</i>  | 0.03                  | $2.65 \times 10^{-8}$ |
|                       | rs62225435  | 22         | 34,176,266                   | <i>LARGE</i>  | 0.03                  | $2.65 \times 10^{-8}$ |
|                       | rs74608905  | 22         | 34,176,823                   | <i>LARGE</i>  | 0.03                  | $2.65 \times 10^{-8}$ |
|                       | rs111819723 | 22         | 34,177,405                   | <i>LARGE</i>  | 0.03                  | $2.65 \times 10^{-8}$ |
|                       | rs117847225 | 22         | 34,178,895                   | <i>LARGE</i>  | 0.03                  | $2.65 \times 10^{-8}$ |

|               |             |            |              |                  |                       |                        |
|---------------|-------------|------------|--------------|------------------|-----------------------|------------------------|
| rs62225437    | 22          | 34,180,711 | <i>LARGE</i> | 0.03             | $2.65 \times 10^{-8}$ |                        |
| rs62225438    | 22          | 34,180,801 | <i>LARGE</i> | 0.03             | $2.65 \times 10^{-8}$ |                        |
| rs11912964    | 22          | 34,182,108 | <i>LARGE</i> | 0.03             | $2.65 \times 10^{-8}$ |                        |
| rs78249327    | 22          | 34,182,849 | <i>LARGE</i> | 0.03             | $3.04 \times 10^{-8}$ |                        |
| rs17735056    | 22          | 34,183,257 | <i>LARGE</i> | 0.03             | $2.65 \times 10^{-8}$ |                        |
| rs62225440    | 22          | 34,184,095 | <i>LARGE</i> | 0.03             | $2.65 \times 10^{-8}$ |                        |
| rs62225441    | 22          | 34,185,870 | <i>LARGE</i> | 0.03             | $2.65 \times 10^{-8}$ |                        |
| rs62225442    | 22          | 34,186,187 | <i>LARGE</i> | 0.03             | $2.65 \times 10^{-8}$ |                        |
| rs62225443    | 22          | 34,186,316 | <i>LARGE</i> | 0.03             | $2.65 \times 10^{-8}$ |                        |
| rs11912570    | 22          | 34,189,746 | <i>LARGE</i> | 0.03             | $2.65 \times 10^{-8}$ |                        |
| rs62225445    | 22          | 34,190,124 | <i>LARGE</i> | 0.03             | $2.65 \times 10^{-8}$ |                        |
| rs62225447    | 22          | 34,190,793 | <i>LARGE</i> | 0.03             | $2.65 \times 10^{-8}$ |                        |
| rs62225448    | 22          | 34,190,850 | <i>LARGE</i> | 0.03             | $2.39 \times 10^{-8}$ |                        |
| rs113825065   | 22          | 34,191,496 | <i>LARGE</i> | 0.03             | $1.34 \times 10^{-8}$ |                        |
| rs113950244   | 22          | 34,191,634 | <i>LARGE</i> | 0.03             | $2.65 \times 10^{-8}$ |                        |
| rs2267287     | 22          | 34,192,621 | <i>LARGE</i> | 0.03             | $2.65 \times 10^{-8}$ |                        |
| rs2267289     | 22          | 34,194,000 | <i>LARGE</i> | 0.03             | $2.65 \times 10^{-8}$ |                        |
| <i>COL1A1</i> | rs79442714  | 1          | 113,833,382  | Intergenic       | 0.85                  | $5.99 \times 10^{-10}$ |
|               | rs12756965  | 1          | 113,839,149  | Intergenic       | 0.85                  | $5.99 \times 10^{-10}$ |
|               | rs12045733  | 1          | 113,848,704  | Intergenic       | 0.85                  | $5.99 \times 10^{-10}$ |
|               | rs12038527  | 1          | 113,848,729  | Intergenic       | 0.85                  | $5.99 \times 10^{-10}$ |
|               | rs4839306   | 1          | 113,849,470  | Intergenic       | 0.85                  | $5.99 \times 10^{-10}$ |
|               | rs12048530  | 1          | 113,851,139  | Intergenic       | 0.85                  | $5.99 \times 10^{-10}$ |
|               | rs12046318  | 1          | 113,854,250  | Intergenic       | 0.85                  | $5.99 \times 10^{-10}$ |
|               | rs35059446  | 1          | 113,858,904  | Intergenic       | 0.85                  | $5.99 \times 10^{-10}$ |
|               | rs2226155   | 1          | 113,865,778  | Intergenic       | 0.70                  | $2.10 \times 10^{-8}$  |
|               | rs1361765   | 1          | 113,866,202  | Intergenic       | 0.70                  | $2.10 \times 10^{-8}$  |
|               | rs12024820  | 1          | 113,866,431  | Intergenic       | 0.70                  | $2.10 \times 10^{-8}$  |
|               | rs6674942   | 1          | 113,866,749  | Intergenic       | 0.70                  | $2.10 \times 10^{-8}$  |
|               | rs12025961  | 1          | 113,867,828  | Intergenic       | 0.70                  | $2.10 \times 10^{-8}$  |
|               | rs12047722  | 1          | 113,868,398  | Intergenic       | 0.70                  | $2.10 \times 10^{-8}$  |
|               | rs4838983   | 1          | 113,870,537  | Intergenic       | 0.70                  | $2.10 \times 10^{-8}$  |
|               | rs4839309   | 1          | 113,871,003  | Intergenic       | 0.70                  | $2.10 \times 10^{-8}$  |
|               | rs72779188  | 2          | 8,393,977    | <i>LINC00299</i> | 0.76                  | $1.80 \times 10^{-8}$  |
|               | rs10490219  | 2          | 8,400,895    | <i>LINC00299</i> | 0.76                  | $1.99 \times 10^{-8}$  |
|               | rs72779193  | 2          | 8,403,566    | <i>LINC00299</i> | 0.79                  | $1.10 \times 10^{-8}$  |
|               | rs72779198  | 2          | 8,405,284    | <i>LINC00299</i> | 0.81                  | $6.53 \times 10^{-9}$  |
|               | rs115336235 | 3          | 90,358,752   | Intergenic       | 0.69                  | $3.92 \times 10^{-8}$  |
|               | rs150483042 | 3          | 90,431,083   | Intergenic       | 0.72                  | $1.14 \times 10^{-8}$  |
|               | rs184655552 | 3          | 90,432,562   | Intergenic       | 0.70                  | $1.98 \times 10^{-8}$  |
|               | rs144677859 | 3          | 90,435,679   | Intergenic       | 0.72                  | $1.14 \times 10^{-8}$  |
|               | rs141940565 | 3          | 90,435,940   | Intergenic       | 0.72                  | $1.14 \times 10^{-8}$  |
|               | rs13315212  | 3          | 115,527,956  | <i>LSAMP</i>     | 0.78                  | $4.40 \times 10^{-9}$  |
|               | rs13315216  | 3          | 115,527,978  | <i>LSAMP</i>     | 0.78                  | $4.40 \times 10^{-9}$  |
|               | rs13325588  | 3          | 115,528,064  | <i>LSAMP</i>     | 0.78                  | $4.40 \times 10^{-9}$  |
|               | rs13128743  | 4          | 7,301,089    | <i>SORCS2</i>    | 0.73                  | $4.44 \times 10^{-8}$  |
|               | rs55932807  | 4          | 90,753,339   | <i>SNCA</i>      | 0.77                  | $2.89 \times 10^{-9}$  |
|               | rs192402944 | 4          | 129,628,719  | Intergenic       | 0.71                  | $2.08 \times 10^{-8}$  |
|               | rs184741912 | 4          | 129,628,720  | Intergenic       | 0.71                  | $2.08 \times 10^{-8}$  |

|             |    |             |                 |      |                        |
|-------------|----|-------------|-----------------|------|------------------------|
| rs189724000 | 4  | 129,628,727 | Intergenic      | 0.73 | $1.25 \times 10^{-8}$  |
| rs13147782  | 4  | 131,034,260 | Intergenic      | 0.93 | $1.33 \times 10^{-10}$ |
| rs116135844 | 4  | 168,179,343 | Intergenic      | 0.86 | $1.16 \times 10^{-9}$  |
| rs11967504  | 6  | 52,521,611  | Intergenic      | 0.77 | $1.72 \times 10^{-9}$  |
| rs75882651  | 6  | 148,792,046 | <i>SASH1</i>    | 0.72 | $3.10 \times 10^{-8}$  |
| rs140793115 | 6  | 160,606,525 | Intergenic      | 0.57 | $4.24 \times 10^{-8}$  |
| rs73024503  | 6  | 162,326,020 | <i>PARK2</i>    | 0.67 | $2.33 \times 10^{-8}$  |
| rs116871569 | 7  | 101,731,567 | <i>CUX1</i>     | 0.78 | $3.92 \times 10^{-9}$  |
| rs17223858  | 8  | 74,698,803  | <i>UBE2W</i>    | 0.71 | $1.25 \times 10^{-8}$  |
| rs112981873 | 8  | 74,798,939  | Intergenic      | 0.74 | $5.07 \times 10^{-9}$  |
| rs7019175   | 9  | 18,522,594  | <i>ADAMTSL1</i> | 0.84 | $1.82 \times 10^{-10}$ |
| rs62566425  | 9  | 67,310,474  | Intergenic      | 0.75 | $8.78 \times 10^{-9}$  |
| rs55861025  | 10 | 7,473,910   | Intergenic      | 0.96 | $2.00 \times 10^{-11}$ |
| rs12249425  | 10 | 131,930,990 | Intergenic      | 0.73 | $3.89 \times 10^{-8}$  |
| rs112346479 | 10 | 131,931,709 | Intergenic      | 0.73 | $3.89 \times 10^{-8}$  |
| rs11017097  | 10 | 131,933,983 | Intergenic      | 0.73 | $3.89 \times 10^{-8}$  |
| rs12259362  | 10 | 131,935,267 | <i>GLRX3</i>    | 0.76 | $2.14 \times 10^{-8}$  |
| rs12259552  | 10 | 131,935,484 | <i>GLRX3</i>    | 0.75 | $1.70 \times 10^{-8}$  |
| rs16910119  | 10 | 131,941,109 | <i>GLRX3</i>    | 0.75 | $1.70 \times 10^{-8}$  |
| rs59112182  | 10 | 131,941,320 | <i>GLRX3</i>    | 0.75 | $1.70 \times 10^{-8}$  |
| rs12241046  | 10 | 131,941,976 | <i>GLRX3</i>    | 0.75 | $1.70 \times 10^{-8}$  |
| rs73389584  | 10 | 131,944,335 | <i>GLRX3</i>    | 0.75 | $1.70 \times 10^{-8}$  |
| rs16910127  | 10 | 131,945,050 | <i>GLRX3</i>    | 0.75 | $1.70 \times 10^{-8}$  |
| rs12247627  | 10 | 131,945,715 | <i>GLRX3</i>    | 0.75 | $1.70 \times 10^{-8}$  |
| rs73389601  | 10 | 131,954,511 | <i>GLRX3</i>    | 0.75 | $1.70 \times 10^{-8}$  |
| rs12245251  | 10 | 131,958,985 | <i>GLRX3</i>    | 0.75 | $1.70 \times 10^{-8}$  |
| rs112831038 | 10 | 131,961,468 | <i>GLRX3</i>    | 0.75 | $1.70 \times 10^{-8}$  |
| rs113773648 | 10 | 131,961,510 | <i>GLRX3</i>    | 0.76 | $2.14 \times 10^{-8}$  |
| rs16910163  | 10 | 131,967,640 | <i>GLRX3</i>    | 0.75 | $1.70 \times 10^{-8}$  |
| rs73391530  | 10 | 131,968,213 | <i>GLRX3</i>    | 0.75 | $1.70 \times 10^{-8}$  |
| rs73391534  | 10 | 131,968,889 | <i>GLRX3</i>    | 0.75 | $1.70 \times 10^{-8}$  |
| rs16910167  | 10 | 131,970,613 | <i>GLRX3</i>    | 0.75 | $1.70 \times 10^{-8}$  |
| rs28548207  | 10 | 131,973,052 | <i>GLRX3</i>    | 0.75 | $1.70 \times 10^{-8}$  |
| rs12262460  | 10 | 131,973,632 | <i>GLRX3</i>    | 0.75 | $1.70 \times 10^{-8}$  |
| rs111905354 | 10 | 131,974,461 | <i>GLRX3</i>    | 0.75 | $1.70 \times 10^{-8}$  |
| rs77706663  | 10 | 131,985,265 | Intergenic      | 0.75 | $1.70 \times 10^{-8}$  |
| rs11017122  | 10 | 131,985,618 | Intergenic      | 0.75 | $1.70 \times 10^{-8}$  |
| rs11017125  | 10 | 131,988,165 | Intergenic      | 0.76 | $2.14 \times 10^{-8}$  |
| rs190065357 | 10 | 134,951,797 | Intergenic      | 0.78 | $2.89 \times 10^{-8}$  |
| rs77531197  | 11 | 22,373,423  | <i>SLC17A6</i>  | 0.82 | $6.35 \times 10^{-9}$  |
| rs67897587  | 12 | 13,293,153  | Intergenic      | 0.94 | $1.09 \times 10^{-11}$ |
| rs73054493  | 12 | 18,897,257  | Intergenic      | 0.78 | $5.19 \times 10^{-9}$  |
| rs73054495  | 12 | 18,897,688  | Intergenic      | 0.78 | $5.19 \times 10^{-9}$  |
| rs73054500  | 12 | 18,897,924  | Intergenic      | 0.78 | $5.19 \times 10^{-9}$  |
| rs11830000  | 12 | 18,898,022  | Intergenic      | 0.77 | $4.81 \times 10^{-9}$  |
| rs73056209  | 12 | 18,898,288  | Intergenic      | 0.78 | $5.19 \times 10^{-9}$  |
| rs17488409  | 12 | 18,899,969  | Intergenic      | 0.76 | $9.28 \times 10^{-9}$  |
| rs73056216  | 12 | 18,902,792  | Intergenic      | 0.72 | $3.08 \times 10^{-8}$  |
| rs140550132 | 12 | 124,415,437 | <i>DNAH10</i>   | 0.74 | $3.00 \times 10^{-8}$  |



|               |            |             |                |               |                        |                        |
|---------------|------------|-------------|----------------|---------------|------------------------|------------------------|
| rs181843847   | 12         | 133,107,327 | <i>FBRSL1</i>  | 0.69          | $7.53 \times 10^{-9}$  |                        |
| rs182087623   | 13         | 43,443,521  | Intergenic     | 0.75          | $4.74 \times 10^{-9}$  |                        |
| rs142713725   | 13         | 88,877,310  | Intergenic     | 0.77          | $5.24 \times 10^{-9}$  |                        |
| rs72658018    | 13         | 113,230,049 | <i>TUBGCP3</i> | 0.84          | $1.50 \times 10^{-9}$  |                        |
| rs77851865    | 14         | 37,011,524  | Intergenic     | 0.69          | $1.99 \times 10^{-8}$  |                        |
| rs114444884   | 14         | 37,013,268  | Intergenic     | 0.69          | $1.99 \times 10^{-8}$  |                        |
| rs141785160   | 14         | 37,013,866  | Intergenic     | 0.69          | $1.99 \times 10^{-8}$  |                        |
| rs147896263   | 14         | 37,014,219  | Intergenic     | 0.69          | $1.99 \times 10^{-8}$  |                        |
| rs12433344    | 14         | 37,015,480  | Intergenic     | 0.69          | $1.99 \times 10^{-8}$  |                        |
| rs8012101     | 14         | 37,023,683  | Intergenic     | 0.73          | $8.09 \times 10^{-9}$  |                        |
| rs75202955    | 14         | 37,029,268  | Intergenic     | 0.73          | $8.09 \times 10^{-9}$  |                        |
| rs12433736    | 14         | 47,505,657  | <i>MDGA2</i>   | 0.59          | $4.84 \times 10^{-8}$  |                        |
| rs7156878     | 14         | 76,140,170  | <i>TLL5</i>    | 0.70          | $2.10 \times 10^{-8}$  |                        |
| rs77439688    | 14         | 76,151,092  | <i>TLL5</i>    | 0.70          | $2.10 \times 10^{-8}$  |                        |
| rs45614641    | 14         | 90,744,345  | Intergenic     | 0.81          | $1.21 \times 10^{-8}$  |                        |
| rs78466601    | 14         | 90,753,082  | <i>NRDE2</i>   | 0.80          | $1.22 \times 10^{-8}$  |                        |
| rs75782643    | 14         | 90,785,989  | <i>NRDE2</i>   | 0.82          | $7.74 \times 10^{-9}$  |                        |
| rs79684894    | 14         | 90,791,704  | <i>NRDE2</i>   | 0.82          | $7.74 \times 10^{-9}$  |                        |
| rs111350821   | 14         | 90,805,500  | Intergenic     | 0.79          | $1.11 \times 10^{-8}$  |                        |
| rs34561641    | 16         | 48,756,957  | Intergenic     | 0.88          | $1.71 \times 10^{-10}$ |                        |
| rs181029676   | 17         | 64,558,223  | <i>PRKCA</i>   | 0.79          | $1.32 \times 10^{-8}$  |                        |
| rs192073405   | 17         | 69,639,501  | Intergenic     | 0.82          | $2.21 \times 10^{-9}$  |                        |
| rs140544461   | 19         | 1,747,397   | Intergenic     | 0.78          | $1.01 \times 10^{-8}$  |                        |
| rs146734736   | 19         | 17,281,448  | <i>MYO9B</i>   | 0.73          | $1.37 \times 10^{-8}$  |                        |
| rs77904645    | 19         | 17,282,804  | <i>MYO9B</i>   | 0.73          | $1.37 \times 10^{-8}$  |                        |
| rs80243139    | 19         | 17,314,600  | <i>MYO9B</i>   | 0.69          | $3.55 \times 10^{-8}$  |                        |
| rs117115747   | 19         | 17,320,272  | <i>MYO9B</i>   | 0.73          | $1.37 \times 10^{-8}$  |                        |
| rs113461568   | 19         | 17,326,124  | Intergenic     | 0.69          | $2.53 \times 10^{-8}$  |                        |
| rs12971477    | 19         | 47,047,113  | <i>PPP5D1</i>  | 0.65          | $1.09 \times 10^{-8}$  |                        |
| rs77494829    | 20         | 6,778,465   | Intergenic     | 0.71          | $3.05 \times 10^{-8}$  |                        |
| rs76537270    | 20         | 6,782,025   | Intergenic     | 0.76          | $6.21 \times 10^{-9}$  |                        |
| rs117388418   | 20         | 61,279,131  | <i>SLCO4A1</i> | 0.70          | $2.94 \times 10^{-8}$  |                        |
| rs34419428    | 20         | 61,288,015  | <i>SLCO4A1</i> | 0.83          | $8.95 \times 10^{-10}$ |                        |
| rs6006621     | 22         | 44,419,407  | <i>PARVB</i>   | 0.77          | $4.86 \times 10^{-8}$  |                        |
| <i>COLIA2</i> | rs3763469  | 7           | 94,021,475     | Intergenic    | 0.03                   | $2.73 \times 10^{-17}$ |
|               | rs17166249 | 7           | 94,036,547     | <i>COLIA2</i> | 0.02                   | $2.48 \times 10^{-8}$  |
|               | rs2521206  | 7           | 94,039,187     | <i>COLIA2</i> | 0.02                   | $4.64 \times 10^{-12}$ |
|               | rs2621208  | 7           | 94,039,410     | <i>COLIA2</i> | 0.02                   | $4.64 \times 10^{-12}$ |
|               | rs421587   | 7           | 94,043,274     | <i>COLIA2</i> | 0.02                   | $2.50 \times 10^{-9}$  |
|               | rs2250365  | 7           | 94,044,803     | <i>COLIA2</i> | 0.02                   | $2.50 \times 10^{-9}$  |
|               | rs2621212  | 7           | 94,045,166     | <i>COLIA2</i> | 0.02                   | $1.72 \times 10^{-9}$  |
|               | rs2621213  | 7           | 94,046,468     | <i>COLIA2</i> | 0.02                   | $2.38 \times 10^{-9}$  |
|               | rs2023729  | 7           | 94,048,165     | <i>COLIA2</i> | 0.02                   | $5.91 \times 10^{-9}$  |
|               | rs77964799 | 7           | 94,048,229     | <i>COLIA2</i> | 0.02                   | $5.91 \times 10^{-9}$  |
|               | rs62464629 | 7           | 94,052,603     | <i>COLIA2</i> | 0.02                   | $6.89 \times 10^{-10}$ |
|               | rs41317734 | 7           | 94,054,194     | <i>COLIA2</i> | 0.02                   | $6.89 \times 10^{-10}$ |
|               | rs62464631 | 7           | 94,055,885     | <i>COLIA2</i> | 0.02                   | $2.14 \times 10^{-10}$ |
|               | rs7804898  | 7           | 94,056,099     | <i>COLIA2</i> | 0.02                   | $6.89 \times 10^{-10}$ |
|               | rs7805430  | 7           | 94,056,216     | <i>COLIA2</i> | 0.02                   | $6.89 \times 10^{-10}$ |

|               |             |    |             |  |                  |      |                        |
|---------------|-------------|----|-------------|--|------------------|------|------------------------|
|               | rs1800248   | 7  | 94,056,349  |  | <i>COLIA2</i>    | 0.02 | $6.89 \times 10^{-10}$ |
|               | rs59226272  | 7  | 94,058,198  |  | <i>COLIA2</i>    | 0.02 | $1.80 \times 10^{-8}$  |
|               | rs11179009  | 12 | 72,356,955  |  | <i>TPH2</i>      | 0.02 | $8.78 \times 10^{-9}$  |
|               | rs11179011  | 12 | 72,357,672  |  | <i>TPH2</i>      | 0.02 | $8.99 \times 10^{-9}$  |
| <i>COL4A1</i> | rs149085004 | 1  | 1,963,089   |  | Intergenic       | 0.11 | $6.71 \times 10^{-9}$  |
|               | rs79466073  | 1  | 50,569,011  |  | <i>ELAVL4</i>    | 0.11 | $1.51 \times 10^{-8}$  |
|               | rs116248210 | 2  | 103,945,833 |  | Intergenic       | 0.12 | $8.79 \times 10^{-10}$ |
|               | rs116506968 | 2  | 183,551,471 |  | Intergenic       | 0.11 | $1.13 \times 10^{-10}$ |
|               | rs191368451 | 3  | 165,841,347 |  | Intergenic       | 0.12 | $3.25 \times 10^{-8}$  |
|               | rs76024614  | 4  | 169,745,500 |  | <i>PALLD</i>     | 0.11 | $1.72 \times 10^{-8}$  |
|               | rs34845474  | 4  | 169,751,339 |  | <i>PALLD</i>     | 0.12 | $7.82 \times 10^{-9}$  |
|               | rs13218634  | 6  | 81,392,645  |  | Intergenic       | 0.11 | $3.88 \times 10^{-8}$  |
|               | rs33951557  | 6  | 81,393,482  |  | Intergenic       | 0.12 | $2.79 \times 10^{-8}$  |
|               | rs141374855 | 6  | 81,394,818  |  | Intergenic       | 0.12 | $2.79 \times 10^{-8}$  |
|               | rs76886693  | 6  | 81,396,607  |  | Intergenic       | 0.12 | $2.79 \times 10^{-8}$  |
|               | rs34570868  | 6  | 81,399,464  |  | Intergenic       | 0.12 | $2.79 \times 10^{-8}$  |
|               | rs55869773  | 7  | 4,498,947   |  | Intergenic       | 0.11 | $4.27 \times 10^{-8}$  |
|               | rs78256678  | 7  | 140,156,723 |  | <i>MKRNI</i>     | 0.08 | $2.96 \times 10^{-8}$  |
|               | rs76598348  | 9  | 7,568,139   |  | Intergenic       | 0.11 | $3.95 \times 10^{-9}$  |
|               | rs76060026  | 9  | 7,568,568   |  | Intergenic       | 0.11 | $3.95 \times 10^{-9}$  |
|               | rs1987249   | 9  | 108,683,134 |  | Intergenic       | 0.11 | $1.26 \times 10^{-8}$  |
|               | rs12001361  | 9  | 108,684,545 |  | Intergenic       | 0.11 | $1.26 \times 10^{-8}$  |
|               | rs4276755   | 9  | 124,377,411 |  | <i>DAB2IP</i>    | 0.11 | $3.10 \times 10^{-8}$  |
|               | rs3898867   | 12 | 9,461,001   |  | <i>LOC642846</i> | 0.08 | $4.15 \times 10^{-8}$  |
|               | rs116674084 | 12 | 61,420,772  |  | Intergenic       | 0.10 | $4.36 \times 10^{-8}$  |
|               | rs182060879 | 12 | 85,650,851  |  | Intergenic       | 0.12 | $5.21 \times 10^{-9}$  |
|               | rs77320233  | 14 | 41,176,356  |  | Intergenic       | 0.10 | $2.51 \times 10^{-8}$  |
|               | rs58877020  | 14 | 95,162,140  |  | Intergenic       | 0.10 | $1.89 \times 10^{-8}$  |
|               | rs112258457 | 14 | 95,162,842  |  | Intergenic       | 0.10 | $2.83 \times 10^{-8}$  |
|               | rs112946166 | 14 | 95,165,113  |  | Intergenic       | 0.10 | $2.83 \times 10^{-8}$  |
|               | rs4396507   | 15 | 32,938,761  |  | <i>SCG5</i>      | 0.12 | $2.75 \times 10^{-8}$  |
|               | rs11867392  | 17 | 1,921,816   |  | <i>RTN4RL1</i>   | 0.10 | $6.45 \times 10^{-9}$  |
|               | rs11868558  | 17 | 6,550,543   |  | <i>MED31</i>     | 0.14 | $8.34 \times 10^{-11}$ |
|               | rs77341824  | 18 | 6,474,441   |  | Intergenic       | 0.09 | $4.45 \times 10^{-8}$  |
|               | rs3747098   | 22 | 22,890,066  |  | Intergenic       | 0.11 | $9.37 \times 10^{-9}$  |
|               | rs8405      | 22 | 22,890,270  |  | <i>PRAME</i>     | 0.10 | $3.27 \times 10^{-8}$  |
|               | rs2073725   | 22 | 22,891,308  |  | <i>PRAME</i>     | 0.11 | $2.01 \times 10^{-8}$  |
|               | rs5996147   | 22 | 22,898,675  |  | <i>PRAME</i>     | 0.11 | $1.52 \times 10^{-8}$  |
|               | rs145692667 | 22 | 22,900,984  |  | <i>PRAME</i>     | 0.11 | $8.09 \times 10^{-9}$  |
|               | rs35317486  | 22 | 22,902,728  |  | <i>LOC648691</i> | 0.12 | $3.05 \times 10^{-9}$  |
|               | rs57306165  | 22 | 22,902,759  |  | <i>LOC648691</i> | 0.12 | $3.05 \times 10^{-9}$  |
|               | rs62225994  | 22 | 22,902,783  |  | <i>LOC648691</i> | 0.12 | $3.05 \times 10^{-9}$  |
|               | rs34575077  | 22 | 22,902,829  |  | <i>LOC648691</i> | 0.12 | $4.02 \times 10^{-9}$  |
|               | rs2266991   | 22 | 22,902,952  |  | <i>LOC648691</i> | 0.12 | $4.02 \times 10^{-9}$  |
|               | rs2266993   | 22 | 22,903,465  |  | <i>LOC648691</i> | 0.11 | $1.11 \times 10^{-8}$  |
|               | rs2266994   | 22 | 22,903,480  |  | <i>LOC648691</i> | 0.11 | $1.88 \times 10^{-8}$  |
|               | rs3827308   | 22 | 22,904,030  |  | <i>LOC648691</i> | 0.11 | $1.39 \times 10^{-8}$  |
|               | rs3827312   | 22 | 22,904,143  |  | <i>LOC648691</i> | 0.11 | $1.11 \times 10^{-8}$  |
|               | rs3827313   | 22 | 22,904,150  |  | <i>LOC648691</i> | 0.11 | $1.11 \times 10^{-8}$  |

|               |    |            |                  |      |                        |
|---------------|----|------------|------------------|------|------------------------|
| rs12628336    | 22 | 22,904,506 | <i>LOC648691</i> | 0.11 | $1.11 \times 10^{-8}$  |
| rs11090146    | 22 | 22,904,802 | <i>LOC648691</i> | 0.11 | $1.11 \times 10^{-8}$  |
| rs12484407    | 22 | 22,905,030 | <i>LOC648691</i> | 0.11 | $1.11 \times 10^{-8}$  |
| rs12484878    | 22 | 22,905,095 | <i>LOC648691</i> | 0.11 | $1.11 \times 10^{-8}$  |
| rs12628961    | 22 | 22,905,574 | <i>LOC648691</i> | 0.11 | $1.11 \times 10^{-8}$  |
| rs12628728    | 22 | 22,905,592 | <i>LOC648691</i> | 0.11 | $1.11 \times 10^{-8}$  |
| rs12628694    | 22 | 22,905,693 | <i>LOC648691</i> | 0.11 | $7.13 \times 10^{-9}$  |
| rs12628708    | 22 | 22,905,786 | <i>LOC648691</i> | 0.11 | $1.19 \times 10^{-8}$  |
| rs12628637    | 22 | 22,905,883 | <i>LOC648691</i> | 0.11 | $7.13 \times 10^{-9}$  |
| rs34159908    | 22 | 22,905,979 | <i>LOC648691</i> | 0.11 | $7.13 \times 10^{-9}$  |
| rs35340611    | 22 | 22,906,060 | <i>LOC648691</i> | 0.11 | $7.13 \times 10^{-9}$  |
| rs4822130     | 22 | 22,906,391 | <i>LOC648691</i> | 0.11 | $7.13 \times 10^{-9}$  |
| rs4822131     | 22 | 22,906,529 | <i>LOC648691</i> | 0.11 | $1.11 \times 10^{-8}$  |
| rs4822132     | 22 | 22,906,901 | <i>LOC648691</i> | 0.11 | $1.11 \times 10^{-8}$  |
| rs12484127    | 22 | 22,907,618 | <i>LOC648691</i> | 0.11 | $1.12 \times 10^{-8}$  |
| rs5996169     | 22 | 22,907,730 | <i>LOC648691</i> | 0.11 | $1.12 \times 10^{-8}$  |
| rs6002751     | 22 | 22,909,312 | Intergenic       | 0.11 | $1.12 \times 10^{-8}$  |
| rs11705416    | 22 | 22,909,404 | Intergenic       | 0.12 | $2.75 \times 10^{-9}$  |
| rs11704554    | 22 | 22,909,424 | Intergenic       | 0.12 | $2.75 \times 10^{-9}$  |
| rs57882020    | 22 | 22,909,636 | Intergenic       | 0.12 | $2.75 \times 10^{-9}$  |
| rs6002757     | 22 | 22,909,963 | Intergenic       | 0.12 | $2.75 \times 10^{-9}$  |
| rs6002758     | 22 | 22,909,981 | Intergenic       | 0.12 | $2.75 \times 10^{-9}$  |
| rs6002759     | 22 | 22,909,983 | Intergenic       | 0.12 | $2.75 \times 10^{-9}$  |
| rs6002761     | 22 | 22,910,145 | Intergenic       | 0.12 | $4.02 \times 10^{-9}$  |
| rs6002762     | 22 | 22,910,191 | Intergenic       | 0.13 | $9.86 \times 10^{-10}$ |
| rs4822137     | 22 | 22,910,273 | Intergenic       | 0.12 | $1.68 \times 10^{-9}$  |
| rs4822138     | 22 | 22,910,416 | Intergenic       | 0.12 | $1.68 \times 10^{-9}$  |
| rs4822139     | 22 | 22,910,523 | Intergenic       | 0.12 | $1.68 \times 10^{-9}$  |
| rs4820467     | 22 | 22,910,531 | Intergenic       | 0.12 | $1.68 \times 10^{-9}$  |
| rs4820468     | 22 | 22,910,674 | Intergenic       | 0.12 | $1.68 \times 10^{-9}$  |
| rs4820469     | 22 | 22,911,060 | Intergenic       | 0.11 | $1.84 \times 10^{-8}$  |
| rs6002772     | 22 | 22,911,549 | Intergenic       | 0.11 | $7.13 \times 10^{-9}$  |
| rs6002778     | 22 | 22,912,168 | Intergenic       | 0.11 | $1.10 \times 10^{-8}$  |
| rs6002779     | 22 | 22,912,890 | Intergenic       | 0.11 | $1.10 \times 10^{-8}$  |
| rs4822154     | 22 | 22,913,629 | Intergenic       | 0.11 | $1.10 \times 10^{-8}$  |
| rs62226018    | 22 | 22,914,300 | Intergenic       | 0.11 | $1.10 \times 10^{-8}$  |
| rs74617949    | 22 | 27,681,626 | Intergenic       | 0.11 | $4.09 \times 10^{-9}$  |
| <i>COL4A2</i> |    |            |                  |      |                        |
| rs3007418     | 1  | 6,526,633  | <i>PLEKHG5</i>   | 0.32 | $1.29 \times 10^{-8}$  |
| rs74595111    | 1  | 9,117,948  | <i>SLC2A5</i>    | 0.28 | $1.65 \times 10^{-8}$  |
| rs3908530     | 1  | 82,943,550 | Intergenic       | 0.31 | $2.61 \times 10^{-8}$  |
| rs12563144    | 1  | 82,944,058 | Intergenic       | 0.31 | $2.61 \times 10^{-8}$  |
| rs12022387    | 1  | 82,946,962 | Intergenic       | 0.31 | $2.61 \times 10^{-8}$  |
| rs12023491    | 1  | 82,948,454 | Intergenic       | 0.31 | $2.61 \times 10^{-8}$  |
| rs75406969    | 1  | 82,953,386 | Intergenic       | 0.31 | $2.61 \times 10^{-8}$  |
| rs12076363    | 1  | 82,957,788 | Intergenic       | 0.31 | $2.61 \times 10^{-8}$  |
| rs11163485    | 1  | 82,958,934 | Intergenic       | 0.30 | $3.48 \times 10^{-8}$  |
| rs11163486    | 1  | 82,958,955 | Intergenic       | 0.31 | $2.61 \times 10^{-8}$  |
| rs17108426    | 1  | 82,960,175 | Intergenic       | 0.31 | $2.61 \times 10^{-8}$  |
| rs71652641    | 1  | 83,942,161 | Intergenic       | 0.31 | $7.85 \times 10^{-9}$  |

|             |   |             |                        |      |                        |
|-------------|---|-------------|------------------------|------|------------------------|
| rs148799277 | 1 | 83,943,833  | Intergenic             | 0.32 | $3.87 \times 10^{-9}$  |
| rs114094232 | 1 | 83,947,011  | Intergenic             | 0.32 | $3.87 \times 10^{-9}$  |
| rs144281778 | 1 | 83,949,995  | Intergenic             | 0.32 | $3.87 \times 10^{-9}$  |
| rs183214628 | 1 | 83,950,958  | Intergenic             | 0.32 | $3.87 \times 10^{-9}$  |
| rs146985494 | 1 | 83,952,773  | Intergenic             | 0.32 | $3.87 \times 10^{-9}$  |
| rs17129518  | 1 | 83,957,067  | Intergenic             | 0.32 | $3.87 \times 10^{-9}$  |
| rs17129962  | 1 | 83,962,407  | Intergenic             | 0.32 | $3.87 \times 10^{-9}$  |
| rs9427710   | 1 | 200,656,391 | <i>LOC101929224</i>    | 0.31 | $9.89 \times 10^{-9}$  |
| rs72810483  | 2 | 47,464,847  | <i>LOC101927043</i>    | 0.29 | $3.07 \times 10^{-8}$  |
| rs116248210 | 2 | 103,945,833 | Intergenic             | 0.34 | $1.49 \times 10^{-10}$ |
| rs140099187 | 2 | 115,060,095 | Intergenic             | 0.31 | $1.16 \times 10^{-8}$  |
| rs12467531  | 2 | 115,150,766 | Intergenic             | 0.33 | $4.96 \times 10^{-9}$  |
| rs113126958 | 2 | 134,065,882 | <i>MIR7853; NCKAP5</i> | 0.26 | $3.64 \times 10^{-8}$  |
| rs116506968 | 2 | 183,551,471 | Intergenic             | 0.26 | $2.96 \times 10^{-9}$  |
| rs3732667   | 3 | 13,612,020  | <i>FBLN2</i>           | 0.28 | $2.36 \times 10^{-8}$  |
| rs62311710  | 4 | 83,992,416  | <i>COPS4</i>           | 0.31 | $3.47 \times 10^{-8}$  |
| rs143921144 | 4 | 164,979,336 | <i>MARCH1</i>          | 0.33 | $2.75 \times 10^{-9}$  |
| rs139975382 | 4 | 164,979,337 | <i>MARCH1</i>          | 0.33 | $2.75 \times 10^{-9}$  |
| rs112705949 | 4 | 165,101,542 | <i>MARCH1</i>          | 0.29 | $4.21 \times 10^{-8}$  |
| rs76024614  | 4 | 169,745,500 | <i>PALLD</i>           | 0.32 | $2.56 \times 10^{-9}$  |
| rs34845474  | 4 | 169,751,339 | <i>PALLD</i>           | 0.34 | $9.32 \times 10^{-10}$ |
| rs190329732 | 5 | 178,839,347 | Intergenic             | 0.30 | $4.14 \times 10^{-9}$  |
| rs13216553  | 6 | 49,863,679  | Intergenic             | 0.24 | $1.55 \times 10^{-8}$  |
| rs34634780  | 6 | 49,864,066  | Intergenic             | 0.24 | $1.55 \times 10^{-8}$  |
| rs35960031  | 6 | 49,866,346  | Intergenic             | 0.24 | $2.06 \times 10^{-8}$  |
| rs13198541  | 6 | 49,866,519  | Intergenic             | 0.25 | $1.14 \times 10^{-8}$  |
| rs13220185  | 6 | 49,871,623  | Intergenic             | 0.24 | $1.88 \times 10^{-8}$  |
| rs71546680  | 6 | 49,871,833  | Intergenic             | 0.24 | $1.88 \times 10^{-8}$  |
| rs13193597  | 6 | 49,872,143  | Intergenic             | 0.24 | $1.88 \times 10^{-8}$  |
| rs13209755  | 6 | 49,872,219  | Intergenic             | 0.24 | $1.88 \times 10^{-8}$  |
| rs35833551  | 6 | 73,989,046  | <i>C6orf147; KHDC1</i> | 0.32 | $2.95 \times 10^{-8}$  |
| rs34353921  | 6 | 73,994,478  | <i>C6orf147; KHDC1</i> | 0.33 | $1.34 \times 10^{-8}$  |
| rs13218634  | 6 | 81,392,645  | Intergenic             | 0.33 | $2.77 \times 10^{-9}$  |
| rs33951557  | 6 | 81,393,482  | Intergenic             | 0.34 | $1.51 \times 10^{-9}$  |
| rs141374855 | 6 | 81,394,818  | Intergenic             | 0.34 | $1.51 \times 10^{-9}$  |
| rs76886693  | 6 | 81,396,607  | Intergenic             | 0.34 | $1.51 \times 10^{-9}$  |
| rs34570868  | 6 | 81,399,464  | Intergenic             | 0.34 | $1.51 \times 10^{-9}$  |
| rs55869773  | 7 | 4,498,947   | Intergenic             | 0.32 | $2.84 \times 10^{-9}$  |
| rs11773071  | 7 | 46,988,659  | Intergenic             | 0.31 | $1.81 \times 10^{-8}$  |
| rs75097405  | 7 | 47,016,706  | Intergenic             | 0.30 | $1.77 \times 10^{-8}$  |
| rs143149138 | 7 | 75,703,521  | Intergenic             | 0.29 | $3.09 \times 10^{-8}$  |
| rs78438375  | 7 | 114,409,885 | Intergenic             | 0.32 | $8.02 \times 10^{-9}$  |
| rs112971957 | 8 | 20,123,575  | Intergenic             | 0.31 | $2.47 \times 10^{-8}$  |
| rs67109150  | 8 | 20,128,497  | Intergenic             | 0.32 | $2.04 \times 10^{-8}$  |
| rs73607971  | 8 | 20,129,346  | Intergenic             | 0.32 | $2.04 \times 10^{-8}$  |
| rs67777401  | 8 | 20,129,780  | Intergenic             | 0.32 | $2.04 \times 10^{-8}$  |
| rs56268521  | 8 | 20,130,102  | Intergenic             | 0.32 | $2.09 \times 10^{-8}$  |
| rs4922145   | 8 | 20,130,379  | Intergenic             | 0.33 | $1.43 \times 10^{-8}$  |
| rs4922146   | 8 | 20,130,816  | Intergenic             | 0.33 | $1.43 \times 10^{-8}$  |

|             |    |             |                          |      |                        |
|-------------|----|-------------|--------------------------|------|------------------------|
| rs66782430  | 8  | 20,131,952  | Intergenic               | 0.33 | $1.43 \times 10^{-8}$  |
| rs185794438 | 8  | 40,231,575  | Intergenic               | 0.31 | $3.91 \times 10^{-9}$  |
| rs17726591  | 8  | 97,650,119  | Intergenic               | 0.32 | $1.40 \times 10^{-8}$  |
| rs34547819  | 8  | 115,982,486 | Intergenic               | 0.35 | $7.48 \times 10^{-10}$ |
| rs4909903   | 8  | 136,241,420 | Intergenic               | 0.29 | $4.90 \times 10^{-8}$  |
| rs76598348  | 9  | 7,568,139   | Intergenic               | 0.27 | $2.37 \times 10^{-8}$  |
| rs76060026  | 9  | 7,568,568   | Intergenic               | 0.27 | $2.37 \times 10^{-8}$  |
| rs151151023 | 9  | 32,101,765  | Intergenic               | 0.28 | $4.01 \times 10^{-8}$  |
| rs139805874 | 9  | 32,132,547  | Intergenic               | 0.29 | $2.74 \times 10^{-8}$  |
| rs10816327  | 9  | 108,544,458 | Intergenic               | 0.27 | $4.38 \times 10^{-8}$  |
| rs10123013  | 9  | 108,547,625 | Intergenic               | 0.32 | $3.86 \times 10^{-9}$  |
| rs7869341   | 9  | 108,620,328 | Intergenic               | 0.33 | $8.95 \times 10^{-10}$ |
| rs10978312  | 9  | 108,623,184 | Intergenic               | 0.33 | $8.95 \times 10^{-10}$ |
| rs10816350  | 9  | 108,624,160 | Intergenic               | 0.33 | $8.95 \times 10^{-10}$ |
| rs1806664   | 9  | 108,626,502 | Intergenic               | 0.37 | $1.81 \times 10^{-10}$ |
| rs9299115   | 9  | 108,627,769 | Intergenic               | 0.27 | $1.88 \times 10^{-8}$  |
| rs4742963   | 9  | 108,631,025 | Intergenic               | 0.26 | $4.86 \times 10^{-8}$  |
| rs10978329  | 9  | 108,642,814 | Intergenic               | 0.26 | $4.86 \times 10^{-8}$  |
| rs35457712  | 9  | 108,644,271 | Intergenic               | 0.26 | $4.86 \times 10^{-8}$  |
| rs13297669  | 9  | 108,647,398 | Intergenic               | 0.26 | $4.86 \times 10^{-8}$  |
| rs13301197  | 9  | 108,647,882 | Intergenic               | 0.26 | $4.86 \times 10^{-8}$  |
| rs1987249   | 9  | 108,683,134 | Intergenic               | 0.32 | $2.07 \times 10^{-9}$  |
| rs12001361  | 9  | 108,684,545 | Intergenic               | 0.32 | $2.07 \times 10^{-9}$  |
| rs12003625  | 9  | 108,702,802 | Intergenic               | 0.28 | $3.80 \times 10^{-8}$  |
| rs13293907  | 9  | 108,702,986 | Intergenic               | 0.28 | $3.80 \times 10^{-8}$  |
| rs13292657  | 9  | 108,703,075 | Intergenic               | 0.28 | $3.80 \times 10^{-8}$  |
| rs34778810  | 9  | 108,830,793 | Intergenic               | 0.34 | $5.41 \times 10^{-9}$  |
| rs13299446  | 9  | 108,838,212 | Intergenic               | 0.30 | $3.45 \times 10^{-8}$  |
| rs62575314  | 9  | 108,839,612 | Intergenic               | 0.30 | $3.45 \times 10^{-8}$  |
| rs13289129  | 9  | 108,842,947 | Intergenic               | 0.30 | $3.45 \times 10^{-8}$  |
| rs115877227 | 9  | 108,849,934 | Intergenic               | 0.30 | $3.45 \times 10^{-8}$  |
| rs62575316  | 9  | 108,850,692 | Intergenic               | 0.30 | $3.45 \times 10^{-8}$  |
| rs62575317  | 9  | 108,851,032 | Intergenic               | 0.30 | $3.45 \times 10^{-8}$  |
| rs10978410  | 9  | 108,851,348 | Intergenic               | 0.30 | $3.45 \times 10^{-8}$  |
| rs10978412  | 9  | 108,851,598 | Intergenic               | 0.30 | $3.45 \times 10^{-8}$  |
| rs1154711   | 9  | 108,852,297 | Intergenic               | 0.30 | $3.45 \times 10^{-8}$  |
| rs34057980  | 9  | 108,852,359 | Intergenic               | 0.35 | $1.57 \times 10^{-9}$  |
| rs12350203  | 9  | 108,855,329 | Intergenic               | 0.30 | $3.45 \times 10^{-8}$  |
| rs13298859  | 9  | 108,856,907 | Intergenic               | 0.30 | $3.45 \times 10^{-8}$  |
| rs35649358  | 9  | 108,857,737 | Intergenic               | 0.30 | $3.45 \times 10^{-8}$  |
| rs13301778  | 9  | 108,859,326 | Intergenic               | 0.30 | $3.45 \times 10^{-8}$  |
| rs13285819  | 9  | 108,860,073 | Intergenic               | 0.30 | $3.45 \times 10^{-8}$  |
| rs13285861  | 9  | 108,860,215 | Intergenic               | 0.30 | $3.45 \times 10^{-8}$  |
| rs36037477  | 9  | 108,877,583 | Intergenic               | 0.32 | $8.69 \times 10^{-9}$  |
| rs4276755   | 9  | 124,377,411 | <i>DAB2IP</i>            | 0.33 | $2.99 \times 10^{-10}$ |
| rs72770225  | 9  | 132,454,730 | <i>PRRX2</i>             | 0.32 | $2.38 \times 10^{-8}$  |
| rs1472187   | 10 | 105,433,192 | <i>SH3PXD2A</i>          | 0.33 | $1.97 \times 10^{-9}$  |
| rs61752934  | 11 | 44,956,459  | <i>TP53I11</i>           | 0.36 | $1.89 \times 10^{-10}$ |
| rs9666102   | 11 | 58,363,293  | <i>ZFP91; ZFP91-CNTF</i> | 0.34 | $8.38 \times 10^{-10}$ |

|             |    |             |                  |      |                        |
|-------------|----|-------------|------------------|------|------------------------|
| rs78149287  | 12 | 26,596,890  | <i>ITPR2</i>     | 0.33 | $3.72 \times 10^{-9}$  |
| rs116674084 | 12 | 61,420,772  | Intergenic       | 0.27 | $4.18 \times 10^{-8}$  |
| rs182060879 | 12 | 85,650,851  | Intergenic       | 0.34 | $1.11 \times 10^{-10}$ |
| rs4767652   | 12 | 118,467,133 | <i>RFC5</i>      | 0.30 | $4.47 \times 10^{-8}$  |
| rs9581495   | 13 | 26,527,621  | <i>ATP8A2</i>    | 0.29 | $3.85 \times 10^{-8}$  |
| rs61951493  | 13 | 64,861,473  | Intergenic       | 0.31 | $4.82 \times 10^{-8}$  |
| rs17260562  | 14 | 90,407,322  | <i>EFCAB11</i>   | 0.31 | $9.29 \times 10^{-9}$  |
| rs146704566 | 14 | 90,410,653  | <i>EFCAB11</i>   | 0.31 | $9.29 \times 10^{-9}$  |
| rs12232164  | 14 | 90,417,508  | <i>EFCAB11</i>   | 0.31 | $9.29 \times 10^{-9}$  |
| rs4143999   | 14 | 90,421,493  | Intergenic       | 0.31 | $2.78 \times 10^{-9}$  |
| rs3759710   | 14 | 90,421,558  | Intergenic       | 0.31 | $2.78 \times 10^{-9}$  |
| rs2181599   | 14 | 90,422,211  | Intergenic       | 0.31 | $9.29 \times 10^{-9}$  |
| rs28736874  | 14 | 90,422,382  | <i>TDP1</i>      | 0.32 | $1.62 \times 10^{-9}$  |
| rs34348197  | 14 | 90,423,131  | <i>TDP1</i>      | 0.31 | $9.29 \times 10^{-9}$  |
| rs10498624  | 14 | 90,465,624  | <i>TDP1</i>      | 0.31 | $9.29 \times 10^{-9}$  |
| rs75312599  | 14 | 90,482,549  | <i>TDP1</i>      | 0.31 | $8.39 \times 10^{-9}$  |
| rs11159945  | 14 | 90,496,548  | <i>TDP1</i>      | 0.29 | $2.33 \times 10^{-8}$  |
| rs36045057  | 14 | 90,508,101  | <i>TDP1</i>      | 0.29 | $2.33 \times 10^{-8}$  |
| rs115371217 | 16 | 83,186,860  | <i>CDH13</i>     | 0.30 | $4.52 \times 10^{-8}$  |
| rs78423309  | 16 | 83,193,188  | <i>CDH13</i>     | 0.30 | $1.11 \times 10^{-8}$  |
| rs145590108 | 16 | 89,641,624  | Intergenic       | 0.31 | $7.77 \times 10^{-9}$  |
| rs11867392  | 17 | 1,921,816   | <i>RTN4RL1</i>   | 0.28 | $2.14 \times 10^{-9}$  |
| rs75551527  | 17 | 12,142,282  | Intergenic       | 0.31 | $1.41 \times 10^{-8}$  |
| rs6501759   | 17 | 66,805,247  | Intergenic       | 0.30 | $2.78 \times 10^{-10}$ |
| rs34552950  | 17 | 79,775,191  | Intergenic       | 0.32 | $1.47 \times 10^{-9}$  |
| rs117726027 | 18 | 27,204,592  | Intergenic       | 0.34 | $2.56 \times 10^{-9}$  |
| rs2825712   | 21 | 21,023,654  | Intergenic       | 0.25 | $2.59 \times 10^{-8}$  |
| rs3747098   | 22 | 22,890,066  | Intergenic       | 0.30 | $1.34 \times 10^{-9}$  |
| rs8405      | 22 | 22,890,270  | <i>PRAME</i>     | 0.29 | $5.06 \times 10^{-9}$  |
| rs2073725   | 22 | 22,891,308  | <i>PRAME</i>     | 0.30 | $3.13 \times 10^{-9}$  |
| rs5996147   | 22 | 22,898,675  | <i>PRAME</i>     | 0.30 | $2.36 \times 10^{-9}$  |
| rs145692667 | 22 | 22,900,984  | <i>PRAME</i>     | 0.31 | $1.35 \times 10^{-9}$  |
| rs35317486  | 22 | 22,902,728  | <i>LOC648691</i> | 0.32 | $4.05 \times 10^{-10}$ |
| rs57306165  | 22 | 22,902,759  | <i>LOC648691</i> | 0.32 | $4.05 \times 10^{-10}$ |
| rs62225994  | 22 | 22,902,783  | <i>LOC648691</i> | 0.32 | $4.05 \times 10^{-10}$ |
| rs34575077  | 22 | 22,902,829  | <i>LOC648691</i> | 0.33 | $3.62 \times 10^{-10}$ |
| rs2266991   | 22 | 22,902,952  | <i>LOC648691</i> | 0.33 | $3.62 \times 10^{-10}$ |
| rs2266993   | 22 | 22,903,465  | <i>LOC648691</i> | 0.31 | $1.45 \times 10^{-9}$  |
| rs2266994   | 22 | 22,903,480  | <i>LOC648691</i> | 0.30 | $2.61 \times 10^{-9}$  |
| rs3827308   | 22 | 22,904,030  | <i>LOC648691</i> | 0.30 | $2.36 \times 10^{-9}$  |
| rs3827312   | 22 | 22,904,143  | <i>LOC648691</i> | 0.31 | $1.45 \times 10^{-9}$  |
| rs3827313   | 22 | 22,904,150  | <i>LOC648691</i> | 0.31 | $1.45 \times 10^{-9}$  |
| rs12628336  | 22 | 22,904,506  | <i>LOC648691</i> | 0.31 | $1.45 \times 10^{-9}$  |
| rs11090146  | 22 | 22,904,802  | <i>LOC648691</i> | 0.31 | $1.45 \times 10^{-9}$  |
| rs12484407  | 22 | 22,905,030  | <i>LOC648691</i> | 0.31 | $1.45 \times 10^{-9}$  |
| rs12484878  | 22 | 22,905,095  | <i>LOC648691</i> | 0.31 | $1.45 \times 10^{-9}$  |
| rs12628961  | 22 | 22,905,574  | <i>LOC648691</i> | 0.31 | $1.45 \times 10^{-9}$  |
| rs12628728  | 22 | 22,905,592  | <i>LOC648691</i> | 0.31 | $1.45 \times 10^{-9}$  |
| rs12628694  | 22 | 22,905,693  | <i>LOC648691</i> | 0.31 | $9.63 \times 10^{-10}$ |

|               |    |             |                  |      |                        |
|---------------|----|-------------|------------------|------|------------------------|
| rs12628708    | 22 | 22,905,786  | <i>LOC648691</i> | 0.30 | $1.69 \times 10^{-9}$  |
| rs12628637    | 22 | 22,905,883  | <i>LOC648691</i> | 0.31 | $9.63 \times 10^{-10}$ |
| rs34159908    | 22 | 22,905,979  | <i>LOC648691</i> | 0.31 | $9.63 \times 10^{-10}$ |
| rs35340611    | 22 | 22,906,060  | <i>LOC648691</i> | 0.31 | $9.63 \times 10^{-10}$ |
| rs4822130     | 22 | 22,906,391  | <i>LOC648691</i> | 0.31 | $9.63 \times 10^{-10}$ |
| rs4822131     | 22 | 22,906,529  | <i>LOC648691</i> | 0.31 | $1.45 \times 10^{-9}$  |
| rs4822132     | 22 | 22,906,901  | <i>LOC648691</i> | 0.31 | $1.45 \times 10^{-9}$  |
| rs12484127    | 22 | 22,907,618  | <i>LOC648691</i> | 0.30 | $2.10 \times 10^{-9}$  |
| rs5996169     | 22 | 22,907,730  | <i>LOC648691</i> | 0.30 | $2.10 \times 10^{-9}$  |
| rs6002751     | 22 | 22,909,312  | Intergenic       | 0.30 | $2.10 \times 10^{-9}$  |
| rs11705416    | 22 | 22,909,404  | Intergenic       | 0.32 | $4.80 \times 10^{-10}$ |
| rs11704554    | 22 | 22,909,424  | Intergenic       | 0.32 | $4.80 \times 10^{-10}$ |
| rs57882020    | 22 | 22,909,636  | Intergenic       | 0.32 | $4.80 \times 10^{-10}$ |
| rs6002757     | 22 | 22,909,963  | Intergenic       | 0.32 | $4.80 \times 10^{-10}$ |
| rs6002758     | 22 | 22,909,981  | Intergenic       | 0.32 | $4.80 \times 10^{-10}$ |
| rs6002759     | 22 | 22,909,983  | Intergenic       | 0.32 | $4.80 \times 10^{-10}$ |
| rs6002761     | 22 | 22,910,145  | Intergenic       | 0.33 | $4.74 \times 10^{-10}$ |
| rs6002762     | 22 | 22,910,191  | Intergenic       | 0.35 | $7.68 \times 10^{-11}$ |
| rs4822137     | 22 | 22,910,273  | Intergenic       | 0.33 | $3.08 \times 10^{-10}$ |
| rs4822138     | 22 | 22,910,416  | Intergenic       | 0.33 | $3.08 \times 10^{-10}$ |
| rs4822139     | 22 | 22,910,523  | Intergenic       | 0.33 | $3.08 \times 10^{-10}$ |
| rs4820467     | 22 | 22,910,531  | Intergenic       | 0.33 | $3.08 \times 10^{-10}$ |
| rs4820468     | 22 | 22,910,674  | Intergenic       | 0.33 | $3.08 \times 10^{-10}$ |
| rs4820469     | 22 | 22,911,060  | Intergenic       | 0.29 | $4.29 \times 10^{-9}$  |
| rs6002772     | 22 | 22,911,549  | Intergenic       | 0.31 | $9.63 \times 10^{-10}$ |
| rs6002778     | 22 | 22,912,168  | Intergenic       | 0.30 | $1.84 \times 10^{-9}$  |
| rs6002779     | 22 | 22,912,890  | Intergenic       | 0.30 | $1.84 \times 10^{-9}$  |
| rs4822154     | 22 | 22,913,629  | Intergenic       | 0.30 | $1.84 \times 10^{-9}$  |
| rs62226018    | 22 | 22,914,300  | Intergenic       | 0.30 | $1.84 \times 10^{-9}$  |
| rs74617949    | 22 | 27,681,626  | Intergenic       | 0.30 | $2.14 \times 10^{-9}$  |
| <i>COL4A5</i> |    |             |                  |      |                        |
| rs12759318    | 1  | 22,308,435  | <i>CELA3B</i>    | 0.35 | $4.20 \times 10^{-10}$ |
| rs2506992     | 1  | 48,097,805  | Intergenic       | 0.39 | $1.10 \times 10^{-10}$ |
| rs145840510   | 1  | 147,832,715 | <i>NBPF8</i>     | 0.36 | $2.38 \times 10^{-10}$ |
| rs78710246    | 1  | 170,641,733 | <i>PRRX1</i>     | 0.31 | $2.83 \times 10^{-10}$ |
| rs141448914   | 1  | 170,749,621 | Intergenic       | 0.28 | $2.27 \times 10^{-9}$  |
| rs12563492    | 1  | 242,909,082 | Intergenic       | 0.32 | $4.03 \times 10^{-8}$  |
| rs17019582    | 2  | 4,702,434   | <i>LINC01249</i> | 0.43 | $1.25 \times 10^{-12}$ |
| rs17019595    | 2  | 4,704,141   | Intergenic       | 0.43 | $1.25 \times 10^{-12}$ |
| rs114677142   | 2  | 131,059,340 | Intergenic       | 0.35 | $1.74 \times 10^{-10}$ |
| rs7566184     | 2  | 158,806,438 | Intergenic       | 0.30 | $1.60 \times 10^{-9}$  |
| rs10168705    | 2  | 158,806,808 | Intergenic       | 0.30 | $6.66 \times 10^{-9}$  |
| rs10203893    | 2  | 158,806,911 | Intergenic       | 0.29 | $1.08 \times 10^{-8}$  |
| rs13405535    | 2  | 158,808,807 | Intergenic       | 0.29 | $1.08 \times 10^{-8}$  |
| rs13432405    | 2  | 158,809,474 | Intergenic       | 0.29 | $1.08 \times 10^{-8}$  |
| rs13397930    | 2  | 158,810,210 | Intergenic       | 0.29 | $1.08 \times 10^{-8}$  |
| rs10167048    | 2  | 158,811,030 | Intergenic       | 0.29 | $1.08 \times 10^{-8}$  |
| rs10175615    | 2  | 158,811,223 | Intergenic       | 0.29 | $1.08 \times 10^{-8}$  |
| rs11900941    | 2  | 158,812,042 | Intergenic       | 0.29 | $1.08 \times 10^{-8}$  |
| rs10171199    | 2  | 158,812,888 | Intergenic       | 0.29 | $1.08 \times 10^{-8}$  |

|             |   |             |               |      |                        |
|-------------|---|-------------|---------------|------|------------------------|
| rs79918420  | 2 | 158,814,171 | Intergenic    | 0.29 | $1.08 \times 10^{-8}$  |
| rs13408052  | 2 | 158,814,842 | Intergenic    | 0.30 | $6.66 \times 10^{-9}$  |
| rs13408263  | 2 | 158,815,012 | Intergenic    | 0.29 | $1.08 \times 10^{-8}$  |
| rs13386758  | 2 | 158,815,586 | Intergenic    | 0.30 | $6.66 \times 10^{-9}$  |
| rs13387442  | 2 | 158,816,186 | Intergenic    | 0.29 | $1.08 \times 10^{-8}$  |
| rs78122893  | 2 | 158,816,395 | Intergenic    | 0.30 | $6.66 \times 10^{-9}$  |
| rs13415315  | 2 | 158,816,891 | Intergenic    | 0.29 | $1.08 \times 10^{-8}$  |
| rs13403742  | 2 | 158,816,902 | Intergenic    | 0.29 | $1.08 \times 10^{-8}$  |
| rs13404058  | 2 | 158,817,214 | Intergenic    | 0.29 | $1.41 \times 10^{-8}$  |
| rs11902033  | 2 | 158,820,256 | Intergenic    | 0.30 | $8.63 \times 10^{-9}$  |
| rs2355159   | 2 | 158,820,860 | Intergenic    | 0.29 | $1.41 \times 10^{-8}$  |
| rs2108812   | 2 | 158,823,815 | Intergenic    | 0.30 | $8.63 \times 10^{-9}$  |
| rs116562129 | 2 | 158,828,149 | Intergenic    | 0.36 | $2.08 \times 10^{-10}$ |
| rs78308467  | 2 | 158,828,240 | Intergenic    | 0.30 | $8.63 \times 10^{-9}$  |
| rs10170886  | 2 | 158,829,363 | Intergenic    | 0.29 | $1.41 \times 10^{-8}$  |
| rs11904437  | 2 | 158,830,525 | Intergenic    | 0.29 | $1.71 \times 10^{-8}$  |
| rs72992248  | 2 | 231,197,652 | <i>SP140L</i> | 0.35 | $3.02 \times 10^{-9}$  |
| rs115882550 | 3 | 83,458,648  | Intergenic    | 0.31 | $2.38 \times 10^{-10}$ |
| rs6873250   | 5 | 3,876,466   | Intergenic    | 0.33 | $9.00 \times 10^{-10}$ |
| rs72729464  | 5 | 3,882,170   | Intergenic    | 0.33 | $9.00 \times 10^{-10}$ |
| rs12520673  | 5 | 3,885,882   | Intergenic    | 0.31 | $3.01 \times 10^{-9}$  |
| rs6860576   | 5 | 3,887,013   | Intergenic    | 0.32 | $1.61 \times 10^{-9}$  |
| rs7721528   | 5 | 3,888,766   | Intergenic    | 0.32 | $1.61 \times 10^{-9}$  |
| rs59862860  | 5 | 3,892,971   | Intergenic    | 0.32 | $1.94 \times 10^{-9}$  |
| rs67486607  | 5 | 3,895,075   | Intergenic    | 0.32 | $1.94 \times 10^{-9}$  |
| rs56194178  | 5 | 63,020,210  | Intergenic    | 0.32 | $9.55 \times 10^{-9}$  |
| rs72766206  | 5 | 63,022,860  | Intergenic    | 0.33 | $3.09 \times 10^{-9}$  |
| rs72766215  | 5 | 63,034,388  | Intergenic    | 0.33 | $3.09 \times 10^{-9}$  |
| rs72766223  | 5 | 63,040,234  | Intergenic    | 0.33 | $3.09 \times 10^{-9}$  |
| rs72766225  | 5 | 63,042,657  | Intergenic    | 0.37 | $3.33 \times 10^{-10}$ |
| rs17545761  | 5 | 146,647,488 | <i>STK32A</i> | 0.36 | $5.14 \times 10^{-11}$ |
| rs73794346  | 5 | 146,647,973 | <i>STK32A</i> | 0.36 | $5.14 \times 10^{-11}$ |
| rs57543595  | 5 | 146,650,914 | <i>STK32A</i> | 0.36 | $5.14 \times 10^{-11}$ |
| rs56070607  | 5 | 146,651,084 | <i>STK32A</i> | 0.36 | $5.14 \times 10^{-11}$ |
| rs55778516  | 5 | 146,651,130 | <i>STK32A</i> | 0.36 | $5.14 \times 10^{-11}$ |
| rs77652165  | 5 | 146,652,471 | <i>STK32A</i> | 0.36 | $5.14 \times 10^{-11}$ |
| rs73794372  | 5 | 146,652,849 | <i>STK32A</i> | 0.36 | $5.14 \times 10^{-11}$ |
| rs76535160  | 5 | 146,654,318 | <i>STK32A</i> | 0.36 | $5.14 \times 10^{-11}$ |
| rs17468085  | 5 | 146,655,511 | <i>STK32A</i> | 0.36 | $5.14 \times 10^{-11}$ |
| rs75926181  | 5 | 146,657,499 | <i>STK32A</i> | 0.36 | $5.14 \times 10^{-11}$ |
| rs115884442 | 5 | 146,660,024 | <i>STK32A</i> | 0.36 | $5.14 \times 10^{-11}$ |
| rs80343345  | 5 | 146,660,758 | <i>STK32A</i> | 0.36 | $5.14 \times 10^{-11}$ |
| rs141016113 | 5 | 146,662,215 | <i>STK32A</i> | 0.36 | $5.14 \times 10^{-11}$ |
| rs116480535 | 5 | 146,664,189 | <i>STK32A</i> | 0.33 | $3.88 \times 10^{-10}$ |
| rs114514147 | 5 | 146,665,169 | <i>STK32A</i> | 0.33 | $3.88 \times 10^{-10}$ |
| rs114316116 | 5 | 146,673,485 | <i>STK32A</i> | 0.33 | $3.88 \times 10^{-10}$ |
| rs78772082  | 5 | 146,674,762 | <i>STK32A</i> | 0.33 | $3.88 \times 10^{-10}$ |
| rs74374168  | 5 | 146,675,454 | <i>STK32A</i> | 0.33 | $3.88 \times 10^{-10}$ |
| rs78649901  | 5 | 146,675,510 | <i>STK32A</i> | 0.33 | $3.88 \times 10^{-10}$ |



|             |    |             |                 |      |                        |
|-------------|----|-------------|-----------------|------|------------------------|
| rs74991998  | 5  | 146,676,067 | <i>STK32A</i>   | 0.32 | $6.26 \times 10^{-10}$ |
| rs79220773  | 5  | 146,677,174 | <i>STK32A</i>   | 0.32 | $6.26 \times 10^{-10}$ |
| rs79541136  | 5  | 146,677,740 | <i>STK32A</i>   | 0.32 | $1.02 \times 10^{-9}$  |
| rs12663463  | 6  | 41,446,439  | Intergenic      | 0.32 | $4.45 \times 10^{-10}$ |
| rs56228155  | 6  | 41,450,083  | Intergenic      | 0.34 | $8.32 \times 10^{-11}$ |
| rs56094721  | 6  | 41,450,339  | Intergenic      | 0.34 | $8.32 \times 10^{-11}$ |
| rs11760167  | 6  | 106,656,099 | <i>ATG5</i>     | 0.37 | $2.10 \times 10^{-9}$  |
| rs146369928 | 6  | 115,472,507 | Intergenic      | 0.32 | $6.75 \times 10^{-9}$  |
| rs34486266  | 6  | 115,487,074 | Intergenic      | 0.31 | $2.01 \times 10^{-8}$  |
| rs78851618  | 6  | 147,047,296 | <i>ADGB</i>     | 0.36 | $3.04 \times 10^{-9}$  |
| rs76974166  | 6  | 147,048,955 | <i>ADGB</i>     | 0.34 | $1.10 \times 10^{-8}$  |
| rs79238855  | 6  | 147,052,125 | <i>ADGB</i>     | 0.34 | $1.10 \times 10^{-8}$  |
| rs76988737  | 6  | 147,055,623 | <i>ADGB</i>     | 0.34 | $1.10 \times 10^{-8}$  |
| rs79047306  | 6  | 147,056,760 | <i>ADGB</i>     | 0.34 | $1.10 \times 10^{-8}$  |
| rs79017204  | 6  | 147,059,238 | <i>ADGB</i>     | 0.34 | $1.10 \times 10^{-8}$  |
| rs80014390  | 6  | 147,059,490 | <i>ADGB</i>     | 0.34 | $1.10 \times 10^{-8}$  |
| rs80345405  | 6  | 147,069,749 | <i>ADGB</i>     | 0.34 | $1.10 \times 10^{-8}$  |
| rs117110483 | 6  | 147,072,612 | <i>ADGB</i>     | 0.34 | $1.10 \times 10^{-8}$  |
| rs78554154  | 6  | 147,076,662 | <i>ADGB</i>     | 0.34 | $1.10 \times 10^{-8}$  |
| rs17535206  | 6  | 147,091,074 | <i>ADGB</i>     | 0.33 | $2.22 \times 10^{-8}$  |
| rs259418    | 6  | 147,094,641 | <i>ADGB</i>     | 0.33 | $2.22 \times 10^{-8}$  |
| rs171826    | 6  | 147,096,447 | <i>ADGB</i>     | 0.33 | $2.22 \times 10^{-8}$  |
| rs16871986  | 7  | 105,399,650 | <i>ATXN7L1</i>  | 0.28 | $1.93 \times 10^{-8}$  |
| rs117766049 | 7  | 129,684,199 | <i>ZC3HC1</i>   | 0.40 | $2.87 \times 10^{-12}$ |
| rs11764066  | 7  | 129,694,738 | Intergenic      | 0.37 | $4.45 \times 10^{-11}$ |
| rs143068807 | 8  | 57,176,364  | Intergenic      | 0.27 | $2.68 \times 10^{-8}$  |
| rs112931164 | 9  | 140,294,496 | <i>EXD3</i>     | 0.34 | $1.48 \times 10^{-8}$  |
| rs10124498  | 9  | 140,295,278 | <i>EXD3</i>     | 0.35 | $3.57 \times 10^{-10}$ |
| rs12257253  | 10 | 2,284,381   | Intergenic      | 0.34 | $1.37 \times 10^{-8}$  |
| rs34700213  | 10 | 15,299,262  | <i>FAM171A1</i> | 0.29 | $2.50 \times 10^{-9}$  |
| rs117417471 | 10 | 56,973,794  | Intergenic      | 0.34 | $2.44 \times 10^{-8}$  |
| rs7121626   | 11 | 5,379,516   | <i>OR51B5</i>   | 0.36 | $2.30 \times 10^{-9}$  |
| rs7939481   | 11 | 5,446,156   | <i>OR51B5</i>   | 0.34 | $1.85 \times 10^{-8}$  |
| rs61894126  | 11 | 5,449,449   | <i>OR51B5</i>   | 0.36 | $7.93 \times 10^{-9}$  |
| rs61894127  | 11 | 5,450,493   | <i>OR51B5</i>   | 0.33 | $3.17 \times 10^{-8}$  |
| rs16930808  | 11 | 5,451,094   | <i>OR51B5</i>   | 0.37 | $3.95 \times 10^{-9}$  |
| rs75819971  | 11 | 123,347,708 | Intergenic      | 0.25 | $1.69 \times 10^{-8}$  |
| rs117888950 | 12 | 74,131,740  | Intergenic      | 0.29 | $4.23 \times 10^{-8}$  |
| rs74479492  | 12 | 74,442,420  | Intergenic      | 0.32 | $3.98 \times 10^{-8}$  |
| rs79308023  | 12 | 74,449,371  | Intergenic      | 0.32 | $3.98 \times 10^{-8}$  |
| rs7954064   | 12 | 74,460,019  | Intergenic      | 0.32 | $3.98 \times 10^{-8}$  |
| rs75617695  | 12 | 74,460,439  | Intergenic      | 0.32 | $3.98 \times 10^{-8}$  |
| rs117898983 | 12 | 74,467,396  | Intergenic      | 0.32 | $3.98 \times 10^{-8}$  |
| rs139034977 | 12 | 74,467,905  | Intergenic      | 0.32 | $3.98 \times 10^{-8}$  |
| rs10506704  | 12 | 74,472,786  | Intergenic      | 0.32 | $3.98 \times 10^{-8}$  |
| rs80351845  | 12 | 74,476,822  | Intergenic      | 0.32 | $3.98 \times 10^{-8}$  |
| rs117866772 | 12 | 74,481,378  | Intergenic      | 0.32 | $3.98 \times 10^{-8}$  |
| rs7964807   | 12 | 74,484,387  | Intergenic      | 0.32 | $2.03 \times 10^{-8}$  |
| rs7965039   | 12 | 74,484,536  | Intergenic      | 0.32 | $3.98 \times 10^{-8}$  |

|             |    |            |                     |      |                       |
|-------------|----|------------|---------------------|------|-----------------------|
| rs151196400 | 12 | 74,486,750 | Intergenic          | 0.32 | $3.98 \times 10^{-8}$ |
| rs2365428   | 12 | 74,488,719 | Intergenic          | 0.32 | $3.98 \times 10^{-8}$ |
| rs116975431 | 12 | 74,489,764 | Intergenic          | 0.32 | $3.98 \times 10^{-8}$ |
| rs117957068 | 12 | 74,491,627 | Intergenic          | 0.32 | $3.98 \times 10^{-8}$ |
| rs2365426   | 12 | 74,492,568 | Intergenic          | 0.32 | $3.98 \times 10^{-8}$ |
| rs75478957  | 12 | 74,493,555 | Intergenic          | 0.32 | $3.98 \times 10^{-8}$ |
| rs76640917  | 12 | 74,495,006 | Intergenic          | 0.32 | $3.98 \times 10^{-8}$ |
| rs7959349   | 12 | 74,495,388 | Intergenic          | 0.32 | $3.98 \times 10^{-8}$ |
| rs12320777  | 12 | 74,510,145 | Intergenic          | 0.32 | $3.98 \times 10^{-8}$ |
| rs80090951  | 12 | 74,510,976 | Intergenic          | 0.32 | $3.98 \times 10^{-8}$ |
| rs7960444   | 12 | 74,513,151 | Intergenic          | 0.32 | $3.98 \times 10^{-8}$ |
| rs2049205   | 12 | 74,514,939 | Intergenic          | 0.32 | $3.98 \times 10^{-8}$ |
| rs7306803   | 12 | 74,521,219 | Intergenic          | 0.32 | $3.98 \times 10^{-8}$ |
| rs116887184 | 12 | 74,523,219 | Intergenic          | 0.32 | $3.98 \times 10^{-8}$ |
| rs75674568  | 12 | 74,525,779 | Intergenic          | 0.32 | $3.98 \times 10^{-8}$ |
| rs78966406  | 12 | 74,532,289 | <i>LOC100507377</i> | 0.32 | $3.98 \times 10^{-8}$ |
| rs78321472  | 12 | 74,533,995 | <i>LOC100507377</i> | 0.32 | $3.98 \times 10^{-8}$ |
| rs116882385 | 12 | 74,543,795 | <i>LOC100507377</i> | 0.32 | $3.98 \times 10^{-8}$ |
| rs17768585  | 12 | 74,545,304 | <i>LOC100507377</i> | 0.32 | $3.98 \times 10^{-8}$ |
| rs116929977 | 12 | 74,555,636 | <i>LOC100507377</i> | 0.32 | $3.98 \times 10^{-8}$ |
| rs1522125   | 12 | 74,556,765 | <i>LOC100507377</i> | 0.32 | $3.98 \times 10^{-8}$ |
| rs189351960 | 12 | 74,560,964 | <i>LOC100507377</i> | 0.33 | $2.88 \times 10^{-8}$ |
| rs7972328   | 12 | 74,570,627 | <i>LOC100507377</i> | 0.32 | $3.98 \times 10^{-8}$ |
| rs78736553  | 12 | 74,574,220 | <i>LOC100507377</i> | 0.32 | $3.98 \times 10^{-8}$ |
| rs78088641  | 12 | 74,580,926 | <i>LOC100507377</i> | 0.32 | $3.98 \times 10^{-8}$ |
| rs117679796 | 12 | 74,583,323 | <i>LOC100507377</i> | 0.32 | $3.98 \times 10^{-8}$ |
| rs139746544 | 12 | 74,583,646 | <i>LOC100507377</i> | 0.32 | $3.98 \times 10^{-8}$ |
| rs77620106  | 12 | 74,592,298 | <i>LOC100507377</i> | 0.32 | $3.98 \times 10^{-8}$ |
| rs76881855  | 12 | 74,600,042 | <i>LOC100507377</i> | 0.32 | $3.98 \times 10^{-8}$ |
| rs77504227  | 12 | 74,624,665 | <i>LOC100507377</i> | 0.32 | $3.98 \times 10^{-8}$ |
| rs17006602  | 12 | 80,690,425 | <i>OTOGL</i>        | 0.32 | $8.35 \times 10^{-9}$ |
| rs17248984  | 12 | 80,716,485 | <i>OTOGL</i>        | 0.32 | $1.27 \times 10^{-8}$ |
| rs17249026  | 12 | 80,717,094 | <i>OTOGL</i>        | 0.32 | $1.27 \times 10^{-8}$ |
| rs76018282  | 12 | 80,722,241 | <i>OTOGL</i>        | 0.32 | $1.27 \times 10^{-8}$ |
| rs4381423   | 12 | 80,741,184 | <i>OTOGL</i>        | 0.30 | $3.78 \times 10^{-8}$ |
| rs1037340   | 12 | 80,743,318 | <i>OTOGL</i>        | 0.32 | $1.05 \times 10^{-8}$ |
| rs1037338   | 12 | 80,743,626 | <i>OTOGL</i>        | 0.32 | $1.05 \times 10^{-8}$ |
| rs10161042  | 12 | 80,745,683 | <i>OTOGL</i>        | 0.32 | $1.27 \times 10^{-8}$ |
| rs75058023  | 12 | 80,748,602 | <i>OTOGL</i>        | 0.32 | $1.93 \times 10^{-8}$ |
| rs2122700   | 12 | 80,751,042 | <i>OTOGL</i>        | 0.31 | $1.61 \times 10^{-8}$ |
| rs2034528   | 12 | 80,752,660 | <i>OTOGL</i>        | 0.32 | $1.27 \times 10^{-8}$ |
| rs79907299  | 12 | 80,752,859 | <i>OTOGL</i>        | 0.32 | $1.27 \times 10^{-8}$ |
| rs79171001  | 12 | 80,753,741 | <i>OTOGL</i>        | 0.32 | $1.27 \times 10^{-8}$ |
| rs7969728   | 12 | 80,753,804 | <i>OTOGL</i>        | 0.32 | $1.05 \times 10^{-8}$ |
| rs10778729  | 12 | 80,754,747 | <i>OTOGL</i>        | 0.32 | $1.05 \times 10^{-8}$ |
| rs2400696   | 12 | 80,756,770 | <i>OTOGL</i>        | 0.32 | $1.05 \times 10^{-8}$ |
| rs76833906  | 12 | 80,757,262 | <i>OTOGL</i>        | 0.32 | $1.27 \times 10^{-8}$ |
| rs2400698   | 12 | 80,757,497 | <i>OTOGL</i>        | 0.31 | $2.20 \times 10^{-8}$ |
| rs921417    | 12 | 80,759,351 | <i>OTOGL</i>        | 0.32 | $1.27 \times 10^{-8}$ |

|             |    |             |                       |      |                        |
|-------------|----|-------------|-----------------------|------|------------------------|
| rs921418    | 12 | 80,759,399  | <i>OTOGL</i>          | 0.32 | $1.05 \times 10^{-8}$  |
| rs4842348   | 12 | 80,759,781  | <i>OTOGL</i>          | 0.32 | $1.27 \times 10^{-8}$  |
| rs2717482   | 12 | 80,761,465  | <i>OTOGL</i>          | 0.32 | $1.27 \times 10^{-8}$  |
| rs1037336   | 12 | 80,765,741  | <i>OTOGL</i>          | 0.32 | $1.05 \times 10^{-8}$  |
| rs7968158   | 12 | 80,768,109  | <i>OTOGL</i>          | 0.32 | $1.05 \times 10^{-8}$  |
| rs10746158  | 12 | 80,768,374  | <i>OTOGL</i>          | 0.32 | $1.05 \times 10^{-8}$  |
| rs2598531   | 12 | 80,775,056  | Intergenic            | 0.32 | $1.05 \times 10^{-8}$  |
| rs7959610   | 12 | 80,778,807  | Intergenic            | 0.32 | $1.27 \times 10^{-8}$  |
| rs2598537   | 12 | 80,781,699  | Intergenic            | 0.32 | $1.27 \times 10^{-8}$  |
| rs2598529   | 12 | 80,788,779  | Intergenic            | 0.32 | $1.27 \times 10^{-8}$  |
| rs2465814   | 12 | 80,789,445  | Intergenic            | 0.32 | $1.27 \times 10^{-8}$  |
| rs7969982   | 12 | 80,793,045  | Intergenic            | 0.32 | $1.27 \times 10^{-8}$  |
| rs2598523   | 12 | 80,798,318  | Intergenic            | 0.32 | $1.27 \times 10^{-8}$  |
| rs2598527   | 12 | 80,800,421  | Intergenic            | 0.32 | $1.27 \times 10^{-8}$  |
| rs2443190   | 12 | 80,802,383  | Intergenic            | 0.32 | $1.27 \times 10^{-8}$  |
| rs2717471   | 12 | 80,807,880  | Intergenic            | 0.32 | $1.27 \times 10^{-8}$  |
| rs4399374   | 12 | 80,814,828  | Intergenic            | 0.32 | $1.27 \times 10^{-8}$  |
| rs4842284   | 12 | 80,823,060  | Intergenic            | 0.31 | $2.50 \times 10^{-8}$  |
| rs11614522  | 12 | 80,833,089  | Intergenic            | 0.30 | $3.61 \times 10^{-8}$  |
| rs7972765   | 12 | 80,833,840  | Intergenic            | 0.30 | $3.61 \times 10^{-8}$  |
| rs7959257   | 12 | 80,833,974  | Intergenic            | 0.30 | $3.61 \times 10^{-8}$  |
| rs11611529  | 12 | 80,835,014  | Intergenic            | 0.30 | $3.61 \times 10^{-8}$  |
| rs11609716  | 12 | 80,835,125  | Intergenic            | 0.30 | $3.61 \times 10^{-8}$  |
| rs73343885  | 12 | 80,835,509  | Intergenic            | 0.30 | $3.61 \times 10^{-8}$  |
| rs11838287  | 12 | 80,835,853  | Intergenic            | 0.30 | $3.61 \times 10^{-8}$  |
| rs58304957  | 12 | 80,836,548  | Intergenic            | 0.30 | $3.61 \times 10^{-8}$  |
| rs73343892  | 12 | 80,836,774  | Intergenic            | 0.30 | $3.61 \times 10^{-8}$  |
| rs56711652  | 12 | 80,838,790  | <i>PTPRQ</i>          | 0.30 | $3.61 \times 10^{-8}$  |
| rs60520650  | 12 | 80,838,885  | <i>PTPRQ</i>          | 0.30 | $3.61 \times 10^{-8}$  |
| rs78809205  | 12 | 80,840,221  | <i>PTPRQ</i>          | 0.30 | $3.56 \times 10^{-8}$  |
| rs184037792 | 12 | 80,846,305  | <i>PTPRQ</i>          | 0.30 | $3.61 \times 10^{-8}$  |
| rs140264421 | 12 | 80,847,016  | <i>PTPRQ</i>          | 0.30 | $3.61 \times 10^{-8}$  |
| rs7294621   | 12 | 80,851,812  | <i>PTPRQ</i>          | 0.30 | $3.61 \times 10^{-8}$  |
| rs59973438  | 12 | 80,852,925  | <i>PTPRQ</i>          | 0.30 | $3.61 \times 10^{-8}$  |
| rs11608378  | 12 | 80,854,501  | <i>PTPRQ</i>          | 0.30 | $3.61 \times 10^{-8}$  |
| rs60342585  | 12 | 80,855,825  | <i>PTPRQ</i>          | 0.30 | $3.61 \times 10^{-8}$  |
| rs140528976 | 12 | 80,857,137  | <i>PTPRQ</i>          | 0.30 | $3.61 \times 10^{-8}$  |
| rs10744193  | 12 | 125,570,197 | <i>AACS</i>           | 0.38 | $1.05 \times 10^{-9}$  |
| rs56838200  | 13 | 106,123,349 | <i>DAOA; DAOA-ASI</i> | 0.32 | $1.27 \times 10^{-8}$  |
| rs12434703  | 14 | 24,461,668  | <i>DHRS4L2</i>        | 0.33 | $5.85 \times 10^{-9}$  |
| rs117548728 | 14 | 28,325,001  | Intergenic            | 0.28 | $4.75 \times 10^{-8}$  |
| rs117219682 | 14 | 59,558,654  | Intergenic            | 0.40 | $8.17 \times 10^{-11}$ |
| rs72721031  | 14 | 68,012,909  | <i>PLEKHH1</i>        | 0.32 | $3.44 \times 10^{-9}$  |
| rs7165046   | 15 | 97,778,882  | Intergenic            | 0.32 | $4.18 \times 10^{-8}$  |
| rs34381428  | 16 | 16,042,558  | Intergenic            | 0.24 | $1.10 \times 10^{-8}$  |
| rs762778    | 16 | 16,047,448  | <i>ABCCI</i>          | 0.23 | $4.45 \times 10^{-8}$  |
| rs762775    | 16 | 16,048,157  | <i>ABCCI</i>          | 0.22 | $4.91 \times 10^{-8}$  |
| rs71378214  | 16 | 16,048,653  | <i>ABCCI</i>          | 0.23 | $3.30 \times 10^{-8}$  |
| rs66704776  | 16 | 62,002,463  | <i>CDH8</i>           | 0.29 | $1.76 \times 10^{-8}$  |

|               |    |             |                  |      |                        |
|---------------|----|-------------|------------------|------|------------------------|
| rs16964108    | 16 | 62,003,448  | <i>CDH8</i>      | 0.29 | $3.21 \times 10^{-8}$  |
| rs3784843     | 16 | 62,003,873  | <i>CDH8</i>      | 0.30 | $7.84 \times 10^{-9}$  |
| rs61196665    | 16 | 62,004,512  | <i>CDH8</i>      | 0.29 | $3.21 \times 10^{-8}$  |
| rs56391958    | 16 | 62,005,709  | <i>CDH8</i>      | 0.29 | $1.14 \times 10^{-8}$  |
| rs16964118    | 16 | 62,009,483  | <i>CDH8</i>      | 0.29 | $3.21 \times 10^{-8}$  |
| rs55973238    | 16 | 62,009,665  | <i>CDH8</i>      | 0.29 | $3.21 \times 10^{-8}$  |
| rs1397133     | 16 | 62,009,911  | <i>CDH8</i>      | 0.29 | $3.21 \times 10^{-8}$  |
| rs1510164     | 16 | 62,011,417  | <i>CDH8</i>      | 0.30 | $1.46 \times 10^{-8}$  |
| rs286672      | 16 | 82,884,821  | <i>CDH13</i>     | 0.35 | $1.78 \times 10^{-8}$  |
| rs7226068     | 17 | 17,231,431  | <i>NT5M</i>      | 0.35 | $1.00 \times 10^{-9}$  |
| rs115384385   | 18 | 49,502,045  | Intergenic       | 0.30 | $6.90 \times 10^{-9}$  |
| rs79355234    | 18 | 49,502,964  | Intergenic       | 0.31 | $3.04 \times 10^{-9}$  |
| rs9946784     | 18 | 49,503,711  | Intergenic       | 0.30 | $6.90 \times 10^{-9}$  |
| rs9952887     | 18 | 49,505,224  | Intergenic       | 0.34 | $5.45 \times 10^{-10}$ |
| rs73453344    | 18 | 49,511,348  | Intergenic       | 0.34 | $3.93 \times 10^{-10}$ |
| rs73453345    | 18 | 49,514,729  | Intergenic       | 0.30 | $9.67 \times 10^{-9}$  |
| rs115725720   | 19 | 35,240,069  | Intergenic       | 0.34 | $2.07 \times 10^{-8}$  |
| rs11696375    | 20 | 16,963,721  | Intergenic       | 0.26 | $4.59 \times 10^{-8}$  |
| rs191717682   | 21 | 46,563,559  | <i>ADARBI</i>    | 0.30 | $5.51 \times 10^{-9}$  |
| rs183572250   | 21 | 46,563,560  | <i>ADARBI</i>    | 0.30 | $5.51 \times 10^{-9}$  |
| rs13048685    | 21 | 46,573,848  | <i>ADARBI</i>    | 0.28 | $1.55 \times 10^{-8}$  |
| <i>COL4A6</i> |    |             |                  |      |                        |
| rs12759318    | 1  | 22,308,435  | <i>CELA3B</i>    | 0.11 | $2.30 \times 10^{-12}$ |
| rs2506992     | 1  | 48,097,805  | Intergenic       | 0.09 | $4.03 \times 10^{-8}$  |
| rs12737330    | 1  | 81,723,771  | Intergenic       | 0.09 | $2.94 \times 10^{-8}$  |
| rs12066036    | 1  | 102,295,275 | <i>OLFM3</i>     | 0.10 | $1.47 \times 10^{-9}$  |
| rs114616075   | 1  | 195,519,020 | Intergenic       | 0.09 | $3.99 \times 10^{-8}$  |
| rs6681782     | 1  | 199,623,380 | Intergenic       | 0.09 | $1.42 \times 10^{-8}$  |
| rs17019582    | 2  | 4,702,434   | <i>LINC01249</i> | 0.09 | $3.86 \times 10^{-8}$  |
| rs17019595    | 2  | 4,704,141   | Intergenic       | 0.09 | $3.86 \times 10^{-8}$  |
| rs72992248    | 2  | 231,197,652 | <i>SP140L</i>    | 0.10 | $7.69 \times 10^{-9}$  |
| rs78261017    | 4  | 17,822,768  | <i>NCAPG</i>     | 0.10 | $7.81 \times 10^{-9}$  |
| rs79611936    | 4  | 17,890,778  | <i>LCORL</i>     | 0.09 | $4.97 \times 10^{-8}$  |
| rs79021772    | 4  | 17,891,057  | <i>LCORL</i>     | 0.09 | $4.97 \times 10^{-8}$  |
| rs77891402    | 4  | 18,035,604  | Intergenic       | 0.09 | $4.48 \times 10^{-8}$  |
| rs116011024   | 4  | 37,145,905  | Intergenic       | 0.08 | $3.77 \times 10^{-8}$  |
| rs115221292   | 4  | 95,833,364  | <i>BMPRI1B</i>   | 0.10 | $3.56 \times 10^{-8}$  |
| rs188631814   | 4  | 137,400,677 | Intergenic       | 0.10 | $7.85 \times 10^{-9}$  |
| rs77668970    | 4  | 161,592,521 | Intergenic       | 0.08 | $6.65 \times 10^{-9}$  |
| rs141082323   | 5  | 715,278     | Intergenic       | 0.09 | $1.91 \times 10^{-9}$  |
| rs139468541   | 5  | 740,120     | Intergenic       | 0.08 | $4.07 \times 10^{-8}$  |
| rs74454732    | 5  | 8,529,419   | Intergenic       | 0.10 | $6.95 \times 10^{-9}$  |
| rs72766225    | 5  | 63,042,657  | Intergenic       | 0.09 | $1.58 \times 10^{-8}$  |
| rs2115766     | 5  | 97,051,163  | Intergenic       | 0.08 | $3.79 \times 10^{-8}$  |
| rs13171515    | 5  | 146,638,927 | <i>STK32A</i>    | 0.06 | $2.16 \times 10^{-8}$  |
| rs13176837    | 5  | 146,639,205 | <i>STK32A</i>    | 0.06 | $2.16 \times 10^{-8}$  |
| rs13163858    | 5  | 146,640,039 | <i>STK32A</i>    | 0.06 | $2.16 \times 10^{-8}$  |
| rs35901580    | 5  | 146,642,649 | <i>STK32A</i>    | 0.06 | $2.16 \times 10^{-8}$  |
| rs35046779    | 5  | 146,645,224 | <i>STK32A</i>    | 0.06 | $2.16 \times 10^{-8}$  |
| rs71580434    | 5  | 146,646,156 | <i>STK32A</i>    | 0.06 | $2.16 \times 10^{-8}$  |

|             |    |             |                |      |                        |
|-------------|----|-------------|----------------|------|------------------------|
| rs34183645  | 5  | 146,646,627 | <i>STK32A</i>  | 0.06 | $2.16 \times 10^{-8}$  |
| rs17545761  | 5  | 146,647,488 | <i>STK32A</i>  | 0.11 | $7.59 \times 10^{-13}$ |
| rs73794346  | 5  | 146,647,973 | <i>STK32A</i>  | 0.11 | $7.59 \times 10^{-13}$ |
| rs57543595  | 5  | 146,650,914 | <i>STK32A</i>  | 0.11 | $7.59 \times 10^{-13}$ |
| rs56070607  | 5  | 146,651,084 | <i>STK32A</i>  | 0.11 | $7.59 \times 10^{-13}$ |
| rs55778516  | 5  | 146,651,130 | <i>STK32A</i>  | 0.11 | $7.59 \times 10^{-13}$ |
| rs77652165  | 5  | 146,652,471 | <i>STK32A</i>  | 0.11 | $7.59 \times 10^{-13}$ |
| rs73794372  | 5  | 146,652,849 | <i>STK32A</i>  | 0.11 | $7.59 \times 10^{-13}$ |
| rs76535160  | 5  | 146,654,318 | <i>STK32A</i>  | 0.11 | $7.59 \times 10^{-13}$ |
| rs17468085  | 5  | 146,655,511 | <i>STK32A</i>  | 0.11 | $7.59 \times 10^{-13}$ |
| rs75926181  | 5  | 146,657,499 | <i>STK32A</i>  | 0.11 | $7.59 \times 10^{-13}$ |
| rs115884442 | 5  | 146,660,024 | <i>STK32A</i>  | 0.11 | $7.59 \times 10^{-13}$ |
| rs80343345  | 5  | 146,660,758 | <i>STK32A</i>  | 0.11 | $7.59 \times 10^{-13}$ |
| rs141016113 | 5  | 146,662,215 | <i>STK32A</i>  | 0.11 | $7.59 \times 10^{-13}$ |
| rs116480535 | 5  | 146,664,189 | <i>STK32A</i>  | 0.10 | $1.03 \times 10^{-11}$ |
| rs114514147 | 5  | 146,665,169 | <i>STK32A</i>  | 0.10 | $1.03 \times 10^{-11}$ |
| rs114316116 | 5  | 146,673,485 | <i>STK32A</i>  | 0.10 | $1.03 \times 10^{-11}$ |
| rs78772082  | 5  | 146,674,762 | <i>STK32A</i>  | 0.10 | $1.03 \times 10^{-11}$ |
| rs74374168  | 5  | 146,675,454 | <i>STK32A</i>  | 0.10 | $1.03 \times 10^{-11}$ |
| rs78649901  | 5  | 146,675,510 | <i>STK32A</i>  | 0.10 | $1.03 \times 10^{-11}$ |
| rs74991998  | 5  | 146,676,067 | <i>STK32A</i>  | 0.10 | $2.15 \times 10^{-11}$ |
| rs79220773  | 5  | 146,677,174 | <i>STK32A</i>  | 0.10 | $2.15 \times 10^{-11}$ |
| rs79541136  | 5  | 146,677,740 | <i>STK32A</i>  | 0.10 | $2.43 \times 10^{-11}$ |
| rs146728068 | 6  | 16,453,666  | <i>ATXN1</i>   | 0.09 | $1.97 \times 10^{-8}$  |
| rs78851618  | 6  | 147,047,296 | <i>ADGB</i>    | 0.09 | $4.95 \times 10^{-8}$  |
| rs73035146  | 6  | 170,447,262 | Intergenic     | 0.10 | $1.01 \times 10^{-10}$ |
| rs71518355  | 7  | 973,917     | <i>ADAPI</i>   | 0.09 | $1.29 \times 10^{-8}$  |
| rs117418571 | 7  | 5,486,051   | Intergenic     | 0.09 | $1.62 \times 10^{-8}$  |
| rs73049985  | 7  | 7,285,708   | <i>CIGALT1</i> | 0.09 | $3.96 \times 10^{-8}$  |
| rs16871986  | 7  | 105,399,650 | <i>ATXN7L1</i> | 0.08 | $2.53 \times 10^{-8}$  |
| rs149596765 | 7  | 129,641,095 | Intergenic     | 0.07 | $3.63 \times 10^{-8}$  |
| rs117766049 | 7  | 129,684,199 | <i>ZC3HC1</i>  | 0.12 | $3.90 \times 10^{-14}$ |
| rs11763967  | 7  | 129,694,473 | Intergenic     | 0.07 | $2.18 \times 10^{-8}$  |
| rs11764066  | 7  | 129,694,738 | Intergenic     | 0.11 | $1.02 \times 10^{-12}$ |
| rs2597395   | 8  | 20,562,950  | Intergenic     | 0.09 | $1.75 \times 10^{-8}$  |
| rs2616246   | 8  | 20,577,316  | Intergenic     | 0.09 | $2.13 \times 10^{-8}$  |
| rs4244464   | 8  | 20,645,930  | Intergenic     | 0.10 | $1.60 \times 10^{-9}$  |
| rs6474703   | 9  | 12,336,801  | Intergenic     | 0.11 | $3.40 \times 10^{-11}$ |
| rs6474704   | 9  | 12,336,809  | Intergenic     | 0.10 | $1.54 \times 10^{-10}$ |
| rs34975489  | 9  | 85,869,511  | <i>FRMD3</i>   | 0.07 | $1.19 \times 10^{-8}$  |
| rs117417471 | 10 | 56,973,794  | Intergenic     | 0.11 | $5.95 \times 10^{-11}$ |
| rs76709638  | 10 | 129,985,694 | Intergenic     | 0.09 | $4.10 \times 10^{-8}$  |
| rs7121626   | 11 | 5,379,516   | <i>OR51B5</i>  | 0.10 | $3.39 \times 10^{-9}$  |
| rs80020515  | 11 | 29,423,557  | Intergenic     | 0.08 | $1.06 \times 10^{-8}$  |
| rs79753183  | 11 | 29,423,561  | Intergenic     | 0.08 | $1.06 \times 10^{-8}$  |
| rs182129188 | 11 | 48,539,676  | Intergenic     | 0.09 | $1.83 \times 10^{-8}$  |
| rs10890946  | 11 | 108,978,494 | Intergenic     | 0.09 | $4.14 \times 10^{-8}$  |
| rs117888950 | 12 | 74,131,740  | Intergenic     | 0.08 | $3.77 \times 10^{-8}$  |
| rs74479492  | 12 | 74,442,420  | Intergenic     | 0.09 | $2.39 \times 10^{-8}$  |

|             |    |             |                     |      |                        |
|-------------|----|-------------|---------------------|------|------------------------|
| rs79308023  | 12 | 74,449,371  | Intergenic          | 0.09 | $2.39 \times 10^{-8}$  |
| rs7954064   | 12 | 74,460,019  | Intergenic          | 0.09 | $2.39 \times 10^{-8}$  |
| rs75617695  | 12 | 74,460,439  | Intergenic          | 0.09 | $2.39 \times 10^{-8}$  |
| rs117898983 | 12 | 74,467,396  | Intergenic          | 0.09 | $2.39 \times 10^{-8}$  |
| rs139034977 | 12 | 74,467,905  | Intergenic          | 0.09 | $2.39 \times 10^{-8}$  |
| rs10506704  | 12 | 74,472,786  | Intergenic          | 0.09 | $2.39 \times 10^{-8}$  |
| rs80351845  | 12 | 74,476,822  | Intergenic          | 0.09 | $2.39 \times 10^{-8}$  |
| rs117866772 | 12 | 74,481,378  | Intergenic          | 0.09 | $2.39 \times 10^{-8}$  |
| rs7964807   | 12 | 74,484,387  | Intergenic          | 0.09 | $3.91 \times 10^{-8}$  |
| rs7965039   | 12 | 74,484,536  | Intergenic          | 0.09 | $2.39 \times 10^{-8}$  |
| rs151196400 | 12 | 74,486,750  | Intergenic          | 0.09 | $2.39 \times 10^{-8}$  |
| rs2365428   | 12 | 74,488,719  | Intergenic          | 0.09 | $2.39 \times 10^{-8}$  |
| rs116975431 | 12 | 74,489,764  | Intergenic          | 0.09 | $2.39 \times 10^{-8}$  |
| rs117957068 | 12 | 74,491,627  | Intergenic          | 0.09 | $2.39 \times 10^{-8}$  |
| rs2365426   | 12 | 74,492,568  | Intergenic          | 0.09 | $2.39 \times 10^{-8}$  |
| rs75478957  | 12 | 74,493,555  | Intergenic          | 0.09 | $2.39 \times 10^{-8}$  |
| rs76640917  | 12 | 74,495,006  | Intergenic          | 0.09 | $2.39 \times 10^{-8}$  |
| rs7959349   | 12 | 74,495,388  | Intergenic          | 0.09 | $2.39 \times 10^{-8}$  |
| rs12320777  | 12 | 74,510,145  | Intergenic          | 0.09 | $2.39 \times 10^{-8}$  |
| rs80090951  | 12 | 74,510,976  | Intergenic          | 0.09 | $2.39 \times 10^{-8}$  |
| rs77573113  | 12 | 74,512,140  | Intergenic          | 0.09 | $3.86 \times 10^{-8}$  |
| rs7960444   | 12 | 74,513,151  | Intergenic          | 0.09 | $2.39 \times 10^{-8}$  |
| rs2049205   | 12 | 74,514,939  | Intergenic          | 0.09 | $2.39 \times 10^{-8}$  |
| rs7306803   | 12 | 74,521,219  | Intergenic          | 0.09 | $2.39 \times 10^{-8}$  |
| rs116887184 | 12 | 74,523,219  | Intergenic          | 0.09 | $2.39 \times 10^{-8}$  |
| rs75674568  | 12 | 74,525,779  | Intergenic          | 0.09 | $2.39 \times 10^{-8}$  |
| rs78966406  | 12 | 74,532,289  | <i>LOC100507377</i> | 0.09 | $2.39 \times 10^{-8}$  |
| rs78321472  | 12 | 74,533,995  | <i>LOC100507377</i> | 0.09 | $2.39 \times 10^{-8}$  |
| rs116882385 | 12 | 74,543,795  | <i>LOC100507377</i> | 0.09 | $2.39 \times 10^{-8}$  |
| rs17768585  | 12 | 74,545,304  | <i>LOC100507377</i> | 0.09 | $2.39 \times 10^{-8}$  |
| rs116929977 | 12 | 74,555,636  | <i>LOC100507377</i> | 0.09 | $2.39 \times 10^{-8}$  |
| rs1522125   | 12 | 74,556,765  | <i>LOC100507377</i> | 0.09 | $2.39 \times 10^{-8}$  |
| rs189351960 | 12 | 74,560,964  | <i>LOC100507377</i> | 0.10 | $1.09 \times 10^{-9}$  |
| rs7972328   | 12 | 74,570,627  | <i>LOC100507377</i> | 0.09 | $2.39 \times 10^{-8}$  |
| rs78736553  | 12 | 74,574,220  | <i>LOC100507377</i> | 0.09 | $2.39 \times 10^{-8}$  |
| rs78088641  | 12 | 74,580,926  | <i>LOC100507377</i> | 0.09 | $2.39 \times 10^{-8}$  |
| rs117679796 | 12 | 74,583,323  | <i>LOC100507377</i> | 0.09 | $2.39 \times 10^{-8}$  |
| rs139746544 | 12 | 74,583,646  | <i>LOC100507377</i> | 0.09 | $2.39 \times 10^{-8}$  |
| rs77620106  | 12 | 74,592,298  | <i>LOC100507377</i> | 0.09 | $2.39 \times 10^{-8}$  |
| rs76881855  | 12 | 74,600,042  | <i>LOC100507377</i> | 0.09 | $2.39 \times 10^{-8}$  |
| rs77504227  | 12 | 74,624,665  | <i>LOC100507377</i> | 0.09 | $2.39 \times 10^{-8}$  |
| rs148043013 | 12 | 132,169,820 | Intergenic          | 0.07 | $4.56 \times 10^{-8}$  |
| rs2296990   | 13 | 99,502,260  | <i>DOCK9</i>        | 0.09 | $2.06 \times 10^{-8}$  |
| rs12428668  | 13 | 99,536,571  | <i>DOCK9</i>        | 0.08 | $4.89 \times 10^{-8}$  |
| rs79164790  | 13 | 99,547,180  | <i>DOCK9</i>        | 0.08 | $4.89 \times 10^{-8}$  |
| rs75707960  | 13 | 99,557,845  | <i>DOCK9</i>        | 0.08 | $4.31 \times 10^{-8}$  |
| rs117219682 | 14 | 59,558,654  | Intergenic          | 0.11 | $2.13 \times 10^{-11}$ |
| rs72721031  | 14 | 68,012,909  | <i>PLEKHH1</i>      | 0.09 | $5.12 \times 10^{-9}$  |
| rs190120154 | 14 | 103,575,566 | <i>EXOC3LA</i>      | 0.09 | $3.78 \times 10^{-8}$  |

|                |             |    |             |                |      |                       |
|----------------|-------------|----|-------------|----------------|------|-----------------------|
|                | rs10520087  | 15 | 38,072,896  | Intergenic     | 0.08 | $2.34 \times 10^{-9}$ |
|                | rs57561745  | 15 | 38,075,566  | Intergenic     | 0.08 | $1.74 \times 10^{-8}$ |
|                | rs7165046   | 15 | 97,778,882  | Intergenic     | 0.09 | $4.72 \times 10^{-8}$ |
|                | rs1858868   | 16 | 23,885,179  | <i>PRKCB</i>   | 0.09 | $3.68 \times 10^{-8}$ |
|                | rs8044732   | 16 | 23,885,608  | <i>PRKCB</i>   | 0.09 | $3.68 \times 10^{-8}$ |
|                | rs4435258   | 16 | 23,885,959  | <i>PRKCB</i>   | 0.09 | $3.68 \times 10^{-8}$ |
|                | rs66704776  | 16 | 62,002,463  | <i>CDH8</i>    | 0.08 | $3.17 \times 10^{-9}$ |
|                | rs16964108  | 16 | 62,003,448  | <i>CDH8</i>    | 0.09 | $3.46 \times 10^{-9}$ |
|                | rs3784843   | 16 | 62,003,873  | <i>CDH8</i>    | 0.09 | $1.01 \times 10^{-9}$ |
|                | rs61196665  | 16 | 62,004,512  | <i>CDH8</i>    | 0.09 | $3.46 \times 10^{-9}$ |
|                | rs56391958  | 16 | 62,005,709  | <i>CDH8</i>    | 0.09 | $1.78 \times 10^{-9}$ |
|                | rs16964118  | 16 | 62,009,483  | <i>CDH8</i>    | 0.09 | $3.46 \times 10^{-9}$ |
|                | rs55973238  | 16 | 62,009,665  | <i>CDH8</i>    | 0.09 | $3.46 \times 10^{-9}$ |
|                | rs1397133   | 16 | 62,009,911  | <i>CDH8</i>    | 0.09 | $3.46 \times 10^{-9}$ |
|                | rs1510164   | 16 | 62,011,417  | <i>CDH8</i>    | 0.09 | $4.29 \times 10^{-9}$ |
|                | rs7226068   | 17 | 17,231,431  | <i>NT5M</i>    | 0.10 | $1.68 \times 10^{-9}$ |
|                | rs145621502 | 17 | 22,243,341  | Intergenic     | 0.08 | $4.17 \times 10^{-8}$ |
|                | rs151244246 | 20 | 37,107,486  | <i>RALGAPB</i> | 0.09 | $2.42 \times 10^{-9}$ |
|                | rs139172260 | 20 | 51,958,877  | <i>TSHZ2</i>   | 0.09 | $2.15 \times 10^{-8}$ |
|                | rs61422883  | 20 | 56,368,107  | Intergenic     | 0.07 | $2.01 \times 10^{-8}$ |
|                | rs77249457  | 20 | 56,368,913  | Intergenic     | 0.07 | $3.13 \times 10^{-8}$ |
|                | rs74717384  | 20 | 56,373,076  | Intergenic     | 0.07 | $3.03 \times 10^{-8}$ |
|                | rs113367448 | 20 | 56,386,246  | Intergenic     | 0.08 | $1.38 \times 10^{-8}$ |
|                | rs113841886 | 20 | 56,387,916  | Intergenic     | 0.08 | $8.97 \times 10^{-9}$ |
|                | rs73154681  | 22 | 31,236,543  | <i>OSBP2</i>   | 0.08 | $3.26 \times 10^{-8}$ |
| <i>COL6A2</i>  | rs114422885 | 3  | 30,278,181  | Intergenic     | 0.09 | $1.84 \times 10^{-8}$ |
|                | rs112001313 | 4  | 72,501,807  | Intergenic     | 0.08 | $2.46 \times 10^{-8}$ |
|                | rs72688432  | 4  | 99,379,586  | Intergenic     | 0.07 | $6.74 \times 10^{-9}$ |
|                | rs57849067  | 9  | 77,836,358  | Intergenic     | 0.07 | $8.11 \times 10^{-9}$ |
|                | rs75498878  | 9  | 77,838,686  | Intergenic     | 0.07 | $1.57 \times 10^{-8}$ |
|                | rs150146176 | 9  | 77,840,842  | Intergenic     | 0.07 | $1.57 \times 10^{-8}$ |
|                | rs77618173  | 9  | 77,845,719  | Intergenic     | 0.07 | $1.57 \times 10^{-8}$ |
| <i>COL9A1</i>  | rs6424206   | 1  | 233,637,491 | Intergenic     | 0.01 | $3.42 \times 10^{-8}$ |
|                | rs12756713  | 1  | 233,638,169 | Intergenic     | 0.01 | $8.61 \times 10^{-9}$ |
|                | rs12743334  | 1  | 233,638,192 | Intergenic     | 0.01 | $8.61 \times 10^{-9}$ |
|                | rs6662352   | 1  | 233,642,172 | Intergenic     | 0.01 | $9.33 \times 10^{-9}$ |
|                | rs10910200  | 1  | 233,643,856 | Intergenic     | 0.01 | $9.33 \times 10^{-9}$ |
|                | rs11689566  | 2  | 118,966,616 | Intergenic     | 0.02 | $4.14 \times 10^{-8}$ |
| <i>COMP</i>    | rs148591107 | 3  | 167,850,620 | Intergenic     | 0.04 | $4.10 \times 10^{-8}$ |
|                | rs143172940 | 3  | 167,851,255 | Intergenic     | 0.04 | $4.10 \times 10^{-8}$ |
| <i>CREB3L1</i> | rs10921465  | 1  | 193,891,763 | Intergenic     | 1.17 | $1.37 \times 10^{-8}$ |
|                | rs77272296  | 1  | 193,896,315 | Intergenic     | 1.17 | $1.37 \times 10^{-8}$ |
|                | rs115496130 | 7  | 8,134,870   | Intergenic     | 0.94 | $2.93 \times 10^{-8}$ |
|                | rs73333264  | 8  | 127,486,784 | Intergenic     | 1.13 | $3.79 \times 10^{-8}$ |
| <i>CREB3L4</i> | rs9950012   | 18 | 73,332,973  | Intergenic     | 1.38 | $8.22 \times 10^{-9}$ |
|                | rs9964145   | 18 | 73,333,179  | Intergenic     | 1.38 | $8.22 \times 10^{-9}$ |
|                | rs1954959   | 18 | 73,333,770  | Intergenic     | 1.28 | $3.74 \times 10^{-8}$ |
| <i>CREB5</i>   | rs118180039 | 8  | 37,839,194  | Intergenic     | 2.20 | $1.85 \times 10^{-8}$ |
|                | rs11634798  | 15 | 69,684,389  | <i>PAQR5</i>   | 2.93 | $3.95 \times 10^{-8}$ |

|              |             |    |             |                      |      |                        |
|--------------|-------------|----|-------------|----------------------|------|------------------------|
|              | rs1394414   | 15 | 69,697,499  | <i>PAQR5</i>         | 2.93 | $3.95 \times 10^{-8}$  |
|              | rs3825858   | 15 | 69,728,949  | <i>KIF23</i>         | 2.93 | $3.95 \times 10^{-8}$  |
|              | rs937724    | 15 | 69,732,736  | <i>KIF23</i>         | 2.93 | $3.95 \times 10^{-8}$  |
|              | rs3784363   | 15 | 69,739,847  | <i>KIF23</i>         | 2.93 | $3.95 \times 10^{-8}$  |
|              | rs13613     | 15 | 69,740,350  | <i>KIF23</i>         | 2.93 | $3.95 \times 10^{-8}$  |
|              | rs8027310   | 15 | 69,742,798  | Intergenic           | 2.93 | $3.95 \times 10^{-8}$  |
| <i>CSF1R</i> | rs17655490  | 5  | 149,340,009 | Intergenic           | 0.13 | $1.90 \times 10^{-9}$  |
|              | rs17655514  | 5  | 149,346,044 | <i>SLC26A2</i>       | 0.12 | $3.87 \times 10^{-8}$  |
|              | rs56369041  | 5  | 149,347,295 | <i>SLC26A2</i>       | 0.12 | $7.56 \times 10^{-9}$  |
|              | rs11739934  | 5  | 149,349,161 | <i>SLC26A2</i>       | 0.12 | $9.86 \times 10^{-9}$  |
|              | rs1560680   | 5  | 149,353,117 | <i>SLC26A2</i>       | 0.13 | $1.39 \times 10^{-8}$  |
|              | rs2879955   | 5  | 149,353,508 | <i>SLC26A2</i>       | 0.12 | $3.47 \times 10^{-8}$  |
|              | rs6896747   | 5  | 149,353,564 | <i>SLC26A2</i>       | 0.12 | $9.30 \times 10^{-9}$  |
|              | rs3756307   | 5  | 149,356,486 | <i>SLC26A2</i>       | 0.12 | $3.47 \times 10^{-8}$  |
|              | rs3812007   | 5  | 149,356,963 | <i>SLC26A2</i>       | 0.12 | $2.27 \times 10^{-8}$  |
|              | rs17110742  | 5  | 149,357,060 | <i>SLC26A2</i>       | 0.12 | $2.27 \times 10^{-8}$  |
|              | rs6860282   | 5  | 149,359,625 | <i>SLC26A2</i>       | 0.12 | $9.86 \times 10^{-9}$  |
|              | rs3776070   | 5  | 149,361,221 | <i>SLC26A2</i>       | 0.12 | $2.58 \times 10^{-9}$  |
|              | rs17711997  | 5  | 149,366,714 | <i>SLC26A2</i>       | 0.13 | $1.87 \times 10^{-9}$  |
|              | rs10476926  | 5  | 149,366,929 | <i>SLC26A2</i>       | 0.12 | $2.07 \times 10^{-8}$  |
|              | rs1816406   | 5  | 149,371,478 | Intergenic           | 0.13 | $2.08 \times 10^{-9}$  |
|              | rs11748318  | 5  | 149,372,149 | Intergenic           | 0.13 | $2.08 \times 10^{-9}$  |
|              | rs973077    | 5  | 149,373,140 | <i>TIGD6</i>         | 0.13 | $2.08 \times 10^{-9}$  |
|              | rs73798339  | 5  | 149,373,740 | <i>TIGD6</i>         | 0.13 | $2.08 \times 10^{-9}$  |
|              | rs145060437 | 5  | 149,377,533 | <i>TIGD6</i>         | 0.15 | $4.73 \times 10^{-10}$ |
|              | rs11745580  | 5  | 149,378,425 | <i>TIGD6</i>         | 0.14 | $8.31 \times 10^{-10}$ |
|              | rs6579765   | 5  | 149,379,897 | <i>TIGD6</i>         | 0.15 | $1.30 \times 10^{-10}$ |
|              | rs4705403   | 5  | 149,380,493 | <i>HMGXB3; TIGD6</i> | 0.15 | $5.06 \times 10^{-10}$ |
|              | rs4705405   | 5  | 149,383,776 | <i>HMGXB3</i>        | 0.15 | $7.76 \times 10^{-11}$ |
|              | rs17110778  | 5  | 149,383,871 | <i>HMGXB3</i>        | 0.15 | $7.76 \times 10^{-11}$ |
|              | rs17110782  | 5  | 149,383,976 | <i>HMGXB3</i>        | 0.15 | $7.76 \times 10^{-11}$ |
|              | rs11738182  | 5  | 149,384,675 | <i>HMGXB3</i>        | 0.15 | $5.06 \times 10^{-10}$ |
|              | rs11167490  | 5  | 149,384,895 | <i>HMGXB3</i>        | 0.15 | $5.06 \times 10^{-10}$ |
|              | rs11738277  | 5  | 149,385,031 | <i>HMGXB3</i>        | 0.15 | $5.06 \times 10^{-10}$ |
|              | rs17110786  | 5  | 149,385,394 | <i>HMGXB3</i>        | 0.15 | $5.06 \times 10^{-10}$ |
|              | rs17110790  | 5  | 149,385,425 | <i>HMGXB3</i>        | 0.15 | $5.06 \times 10^{-10}$ |
|              | rs11742537  | 5  | 149,385,872 | <i>HMGXB3</i>        | 0.15 | $5.06 \times 10^{-10}$ |
|              | rs6872735   | 5  | 149,386,314 | <i>HMGXB3</i>        | 0.15 | $5.06 \times 10^{-10}$ |
|              | rs6888795   | 5  | 149,387,657 | <i>HMGXB3</i>        | 0.16 | $1.16 \times 10^{-10}$ |
|              | rs1469689   | 5  | 149,388,340 | <i>HMGXB3</i>        | 0.15 | $5.06 \times 10^{-10}$ |
|              | rs4705406   | 5  | 149,388,864 | <i>HMGXB3</i>        | 0.15 | $5.06 \times 10^{-10}$ |
|              | rs11167491  | 5  | 149,389,573 | <i>HMGXB3</i>        | 0.15 | $5.06 \times 10^{-10}$ |
|              | rs2241698   | 5  | 149,390,148 | <i>HMGXB3</i>        | 0.15 | $5.06 \times 10^{-10}$ |
|              | rs4597953   | 5  | 149,394,704 | <i>HMGXB3</i>        | 0.15 | $5.01 \times 10^{-10}$ |
|              | rs7700386   | 5  | 149,396,515 | <i>HMGXB3</i>        | 0.16 | $1.10 \times 10^{-11}$ |
|              | rs7720460   | 5  | 149,396,534 | <i>HMGXB3</i>        | 0.16 | $1.10 \times 10^{-11}$ |
|              | rs7700709   | 5  | 149,396,646 | <i>HMGXB3</i>        | 0.16 | $1.10 \times 10^{-11}$ |
|              | rs11740243  | 5  | 149,397,104 | <i>HMGXB3</i>        | 0.16 | $1.10 \times 10^{-11}$ |
|              | rs11741233  | 5  | 149,398,555 | <i>HMGXB3</i>        | 0.15 | $5.06 \times 10^{-10}$ |



|              |            |             |               |               |                        |                       |
|--------------|------------|-------------|---------------|---------------|------------------------|-----------------------|
| rs4705105    | 5          | 149,399,330 | <i>HMGXB3</i> | 0.15          | $5.06 \times 10^{-10}$ |                       |
| rs10515635   | 5          | 149,402,113 | <i>HMGXB3</i> | 0.15          | $5.06 \times 10^{-10}$ |                       |
| rs57091804   | 5          | 149,402,905 | <i>HMGXB3</i> | 0.15          | $5.06 \times 10^{-10}$ |                       |
| rs10068365   | 5          | 149,403,100 | <i>HMGXB3</i> | 0.15          | $5.06 \times 10^{-10}$ |                       |
| rs58265464   | 5          | 149,408,929 | <i>HMGXB3</i> | 0.15          | $1.46 \times 10^{-10}$ |                       |
| rs1469690    | 5          | 149,409,773 | <i>HMGXB3</i> | 0.15          | $1.46 \times 10^{-10}$ |                       |
| rs2278393    | 5          | 149,410,153 | <i>HMGXB3</i> | 0.14          | $1.37 \times 10^{-9}$  |                       |
| rs2278394    | 5          | 149,410,519 | <i>HMGXB3</i> | 0.16          | $6.85 \times 10^{-12}$ |                       |
| rs6890492    | 5          | 149,412,778 | <i>HMGXB3</i> | 0.16          | $1.10 \times 10^{-11}$ |                       |
| rs11167493   | 5          | 149,413,441 | <i>HMGXB3</i> | 0.16          | $9.79 \times 10^{-12}$ |                       |
| rs714099     | 5          | 149,413,659 | <i>HMGXB3</i> | 0.16          | $7.18 \times 10^{-12}$ |                       |
| rs12523182   | 5          | 149,414,017 | <i>HMGXB3</i> | 0.16          | $9.79 \times 10^{-12}$ |                       |
| rs55756417   | 5          | 149,414,652 | <i>HMGXB3</i> | 0.17          | $3.38 \times 10^{-12}$ |                       |
| rs17110845   | 5          | 149,415,095 | <i>HMGXB3</i> | 0.17          | $3.38 \times 10^{-12}$ |                       |
| rs12519384   | 5          | 149,415,558 | <i>HMGXB3</i> | 0.17          | $3.38 \times 10^{-12}$ |                       |
| rs6887999    | 5          | 149,417,138 | <i>HMGXB3</i> | 0.16          | $1.29 \times 10^{-10}$ |                       |
| rs6888440    | 5          | 149,417,552 | <i>HMGXB3</i> | 0.16          | $1.29 \times 10^{-10}$ |                       |
| rs10062594   | 5          | 149,418,126 | <i>HMGXB3</i> | 0.16          | $1.29 \times 10^{-10}$ |                       |
| rs10440733   | 5          | 149,419,188 | <i>HMGXB3</i> | 0.15          | $1.82 \times 10^{-10}$ |                       |
| rs6860276    | 5          | 149,419,792 | <i>HMGXB3</i> | 0.15          | $1.82 \times 10^{-10}$ |                       |
| rs4705410    | 5          | 149,419,991 | <i>HMGXB3</i> | 0.15          | $1.82 \times 10^{-10}$ |                       |
| rs2304070    | 5          | 149,420,698 | <i>HMGXB3</i> | 0.17          | $3.38 \times 10^{-12}$ |                       |
| rs2276982    | 5          | 149,421,502 | <i>HMGXB3</i> | 0.16          | $9.79 \times 10^{-12}$ |                       |
| rs58861317   | 5          | 149,425,788 | <i>HMGXB3</i> | 0.16          | $1.29 \times 10^{-10}$ |                       |
| rs6894582    | 5          | 149,425,903 | <i>HMGXB3</i> | 0.16          | $1.29 \times 10^{-10}$ |                       |
| rs145571340  | 5          | 149,426,307 | <i>HMGXB3</i> | 0.15          | $2.26 \times 10^{-9}$  |                       |
| rs7715409    | 5          | 149,427,543 | <i>HMGXB3</i> | 0.16          | $1.94 \times 10^{-11}$ |                       |
| rs216129     | 5          | 149,430,657 | <i>HMGXB3</i> | 0.09          | $3.82 \times 10^{-8}$  |                       |
| rs216130     | 5          | 149,430,915 | <i>HMGXB3</i> | 0.09          | $8.53 \times 10^{-9}$  |                       |
| rs4705411    | 5          | 149,431,025 | <i>HMGXB3</i> | 0.13          | $2.51 \times 10^{-11}$ |                       |
| rs1062069    | 5          | 149,432,613 | <i>HMGXB3</i> | 0.15          | $6.61 \times 10^{-11}$ |                       |
| rs3828609    | 5          | 149,432,863 | <i>CSF1R</i>  | 0.16          | $5.62 \times 10^{-13}$ |                       |
| rs6885913    | 5          | 149,436,598 | <i>CSF1R</i>  | 0.18          | $8.18 \times 10^{-13}$ |                       |
| rs4705412    | 5          | 149,438,377 | <i>CSF1R</i>  | 0.16          | $1.12 \times 10^{-11}$ |                       |
| rs3733672    | 5          | 149,439,494 | <i>CSF1R</i>  | 0.15          | $7.67 \times 10^{-11}$ |                       |
| rs12516676   | 5          | 149,440,045 | <i>CSF1R</i>  | 0.18          | $8.18 \times 10^{-13}$ |                       |
| rs12518674   | 5          | 149,442,231 | <i>CSF1R</i>  | 0.15          | $3.35 \times 10^{-10}$ |                       |
| rs12518632   | 5          | 149,442,232 | <i>CSF1R</i>  | 0.15          | $2.35 \times 10^{-10}$ |                       |
| rs2282806    | 5          | 149,442,474 | <i>CSF1R</i>  | 0.15          | $6.59 \times 10^{-11}$ |                       |
| rs2282805    | 5          | 149,442,548 | <i>CSF1R</i>  | 0.13          | $6.33 \times 10^{-10}$ |                       |
| rs11738211   | 5          | 149,442,779 | <i>CSF1R</i>  | 0.18          | $8.18 \times 10^{-13}$ |                       |
| rs10476929   | 5          | 149,443,670 | <i>CSF1R</i>  | 0.15          | $1.47 \times 10^{-10}$ |                       |
| rs2282804    | 5          | 149,445,345 | <i>CSF1R</i>  | 0.16          | $6.49 \times 10^{-12}$ |                       |
| rs216146     | 5          | 149,445,921 | <i>CSF1R</i>  | 0.10          | $5.26 \times 10^{-10}$ |                       |
| rs7719910    | 5          | 149,445,987 | <i>CSF1R</i>  | 0.18          | $4.21 \times 10^{-14}$ |                       |
| rs216150     | 5          | 149,447,628 | <i>CSF1R</i>  | 0.10          | $2.07 \times 10^{-9}$  |                       |
| rs3776074    | 5          | 149,451,326 | <i>CSF1R</i>  | 0.12          | $2.83 \times 10^{-9}$  |                       |
| rs13188584   | 5          | 149,459,574 | <i>CSF1R</i>  | 0.15          | $8.27 \times 10^{-10}$ |                       |
| <i>EFNA1</i> | rs61853583 | 10          | 56,231,150    | <i>PCDH15</i> | 0.36                   | $5.39 \times 10^{-9}$ |

|              |             |    |             |                 |       |                        |
|--------------|-------------|----|-------------|-----------------|-------|------------------------|
|              | rs61324884  | 10 | 56,234,123  | <i>PCDH15</i>   | 0.36  | $5.39 \times 10^{-9}$  |
|              | rs11004335  | 10 | 56,245,720  | <i>PCDH15</i>   | 0.36  | $5.37 \times 10^{-9}$  |
|              | rs11004337  | 10 | 56,249,445  | <i>PCDH15</i>   | 0.36  | $5.37 \times 10^{-9}$  |
|              | rs11045738  | 12 | 21,239,970  | <i>SLCO1B7</i>  | 0.29  | $4.41 \times 10^{-9}$  |
|              | rs7330507   | 13 | 60,125,652  | Intergenic      | 0.48  | $1.70 \times 10^{-8}$  |
|              | rs77863572  | 13 | 60,127,130  | Intergenic      | 0.46  | $3.40 \times 10^{-8}$  |
|              | rs80346741  | 14 | 101,762,339 | Intergenic      | 0.33  | $2.95 \times 10^{-8}$  |
| <i>EFNA3</i> | rs587668    | 4  | 20,190,972  | Intergenic      | 0.46  | $3.92 \times 10^{-8}$  |
|              | rs677198    | 4  | 20,195,830  | Intergenic      | 0.49  | $5.70 \times 10^{-9}$  |
|              | rs613798    | 4  | 20,198,845  | Intergenic      | 0.46  | $3.92 \times 10^{-8}$  |
|              | rs2575080   | 4  | 20,200,817  | Intergenic      | 0.46  | $3.92 \times 10^{-8}$  |
|              | rs593770    | 4  | 20,201,089  | Intergenic      | 0.46  | $3.92 \times 10^{-8}$  |
|              | rs3113804   | 4  | 20,234,411  | Intergenic      | 0.44  | $4.21 \times 10^{-8}$  |
|              | rs665559    | 4  | 20,235,325  | Intergenic      | 0.44  | $4.21 \times 10^{-8}$  |
|              | rs574666    | 4  | 20,236,850  | Intergenic      | 0.44  | $4.21 \times 10^{-8}$  |
|              | rs526398    | 4  | 20,238,979  | Intergenic      | 0.43  | $2.24 \times 10^{-8}$  |
|              | rs618286    | 4  | 20,238,988  | Intergenic      | 0.43  | $2.24 \times 10^{-8}$  |
|              | rs117289532 | 19 | 48,077,320  | Intergenic      | 0.88  | $2.37 \times 10^{-8}$  |
| <i>EGF</i>   | rs76256974  | 8  | 116,582,284 | <i>TRPS1</i>    | 0.03  | $3.35 \times 10^{-8}$  |
|              | rs3135758   | 10 | 123,277,869 | <i>FGFR2</i>    | 0.03  | $4.19 \times 10^{-9}$  |
|              | rs61934888  | 12 | 132,122,806 | Intergenic      | 0.03  | $2.39 \times 10^{-8}$  |
| <i>EGFR</i>  | rs76088979  | 10 | 78,003,251  | <i>C10orf11</i> | 0.20  | $3.71 \times 10^{-8}$  |
|              | rs16933093  | 10 | 78,005,660  | <i>C10orf11</i> | 0.20  | $3.71 \times 10^{-8}$  |
|              | rs77953595  | 10 | 78,006,551  | <i>C10orf11</i> | 0.20  | $3.71 \times 10^{-8}$  |
| <i>EIF4B</i> | rs41307147  | 6  | 74,527,043  | <i>CD109</i>    | 18.30 | $1.10 \times 10^{-8}$  |
|              | rs192149131 | 10 | 7,299,082   | <i>SFMBT2</i>   | 16.22 | $3.54 \times 10^{-8}$  |
|              | rs181906364 | 10 | 7,299,083   | <i>SFMBT2</i>   | 16.22 | $3.54 \times 10^{-8}$  |
|              | rs185686171 | 10 | 7,299,085   | <i>SFMBT2</i>   | 16.22 | $3.54 \times 10^{-8}$  |
|              | rs144071120 | 19 | 54,585,335  | Intergenic      | 18.90 | $4.16 \times 10^{-8}$  |
|              | rs145149488 | 19 | 54,591,697  | Intergenic      | 21.10 | $5.74 \times 10^{-10}$ |
|              | rs78522590  | 19 | 54,592,755  | Intergenic      | 21.74 | $3.71 \times 10^{-9}$  |
|              | rs79060636  | 19 | 54,592,896  | Intergenic      | 20.61 | $9.95 \times 10^{-9}$  |
|              | rs189820066 | 19 | 54,593,226  | Intergenic      | 20.61 | $9.95 \times 10^{-9}$  |
|              | rs148439599 | 19 | 54,593,558  | Intergenic      | 20.04 | $8.54 \times 10^{-9}$  |
|              | rs118149072 | 19 | 54,593,579  | Intergenic      | 20.61 | $9.95 \times 10^{-9}$  |
|              | rs117045873 | 19 | 54,593,681  | Intergenic      | 20.74 | $1.17 \times 10^{-8}$  |
|              | rs118026095 | 19 | 54,593,725  | Intergenic      | 20.74 | $1.17 \times 10^{-8}$  |
|              | rs142554342 | 19 | 54,593,797  | Intergenic      | 20.61 | $9.95 \times 10^{-9}$  |
|              | rs75603280  | 19 | 54,594,671  | Intergenic      | 20.61 | $9.95 \times 10^{-9}$  |
|              | rs117195689 | 19 | 54,594,897  | Intergenic      | 20.61 | $9.95 \times 10^{-9}$  |
|              | rs150414044 | 19 | 54,594,976  | Intergenic      | 20.61 | $9.95 \times 10^{-9}$  |
|              | rs138139207 | 19 | 54,595,065  | Intergenic      | 21.14 | $9.13 \times 10^{-9}$  |
|              | rs116939840 | 19 | 54,595,337  | Intergenic      | 20.61 | $9.95 \times 10^{-9}$  |
|              | rs117291682 | 19 | 54,595,351  | Intergenic      | 20.61 | $9.95 \times 10^{-9}$  |
|              | rs117637006 | 19 | 54,595,526  | Intergenic      | 20.61 | $9.95 \times 10^{-9}$  |
|              | rs75625913  | 19 | 54,596,164  | Intergenic      | 20.61 | $9.95 \times 10^{-9}$  |
|              | rs117982154 | 19 | 54,596,270  | Intergenic      | 20.61 | $9.95 \times 10^{-9}$  |
|              | rs191155753 | 19 | 54,596,882  | Intergenic      | 20.61 | $9.95 \times 10^{-9}$  |
|              | rs78928237  | 19 | 54,597,720  | Intergenic      | 20.61 | $9.95 \times 10^{-9}$  |

|              |             |    |             |                |       |                        |
|--------------|-------------|----|-------------|----------------|-------|------------------------|
|              | rs118027525 | 19 | 54,597,983  | <i>OSCAR</i>   | 20.61 | $9.95 \times 10^{-9}$  |
|              | rs140133395 | 19 | 54,598,048  | <i>OSCAR</i>   | 20.61 | $9.95 \times 10^{-9}$  |
| <i>EIF4E</i> | rs17112028  | 10 | 98,430,561  | <i>PIK3API</i> | 5.75  | $4.37 \times 10^{-8}$  |
|              | rs17112030  | 10 | 98,430,592  | <i>PIK3API</i> | 5.75  | $4.37 \times 10^{-8}$  |
|              | rs74153705  | 10 | 98,431,319  | <i>PIK3API</i> | 5.75  | $4.37 \times 10^{-8}$  |
|              | rs7910144   | 10 | 98,432,671  | <i>PIK3API</i> | 5.75  | $4.37 \times 10^{-8}$  |
|              | rs7895244   | 10 | 98,432,703  | <i>PIK3API</i> | 5.75  | $4.37 \times 10^{-8}$  |
| <i>EPOR</i>  | rs71498475  | 9  | 85,401,997  | Intergenic     | -0.30 | $1.08 \times 10^{-8}$  |
|              | rs34460378  | 9  | 85,403,095  | Intergenic     | -0.30 | $1.08 \times 10^{-8}$  |
| <i>F2R</i>   | rs117417471 | 10 | 56,973,794  | Intergenic     | 1.28  | $4.91 \times 10^{-8}$  |
|              | rs75335471  | 14 | 70,248,423  | <i>SLC10A1</i> | 1.25  | $7.02 \times 10^{-9}$  |
|              | rs75927735  | 15 | 86,169,103  | <i>AKAP13</i>  | 1.29  | $7.40 \times 10^{-11}$ |
|              | rs76204898  | 15 | 86,294,126  | Intergenic     | 1.19  | $1.98 \times 10^{-10}$ |
|              | rs8041288   | 15 | 86,311,593  | <i>KLHL25</i>  | 1.21  | $5.57 \times 10^{-10}$ |
|              | rs35582838  | 15 | 86,312,294  | <i>KLHL25</i>  | 1.21  | $5.57 \times 10^{-10}$ |
|              | rs77768079  | 15 | 86,314,419  | <i>KLHL25</i>  | 1.21  | $5.57 \times 10^{-10}$ |
|              | rs12324250  | 15 | 86,319,712  | <i>KLHL25</i>  | 1.08  | $4.12 \times 10^{-8}$  |
|              | rs76587220  | 15 | 86,322,550  | <i>KLHL25</i>  | 1.21  | $5.57 \times 10^{-10}$ |
|              | rs80251970  | 15 | 86,325,940  | <i>KLHL25</i>  | 1.21  | $5.57 \times 10^{-10}$ |
|              | rs113962703 | 15 | 86,330,332  | <i>KLHL25</i>  | 1.03  | $1.41 \times 10^{-8}$  |
|              | rs16944491  | 15 | 86,330,886  | <i>KLHL25</i>  | 1.21  | $5.57 \times 10^{-10}$ |
|              | rs16944522  | 15 | 86,332,128  | <i>KLHL25</i>  | 1.21  | $5.57 \times 10^{-10}$ |
|              | rs75890212  | 15 | 86,337,055  | <i>KLHL25</i>  | 1.21  | $7.53 \times 10^{-10}$ |
|              | rs79719545  | 15 | 86,337,648  | <i>KLHL25</i>  | 1.21  | $7.53 \times 10^{-10}$ |
|              | rs111578069 | 15 | 86,338,013  | <i>KLHL25</i>  | 1.21  | $1.25 \times 10^{-9}$  |
|              | rs75595815  | 15 | 86,338,955  | Intergenic     | 1.21  | $7.53 \times 10^{-10}$ |
| <i>FGF2</i>  | rs17200502  | 3  | 16,891,069  | Intergenic     | 0.24  | $3.87 \times 10^{-8}$  |
|              | rs13103403  | 4  | 123,612,272 | Intergenic     | -0.19 | $2.63 \times 10^{-10}$ |
|              | rs13101575  | 4  | 123,617,561 | Intergenic     | -0.19 | $1.80 \times 10^{-10}$ |
|              | rs376131    | 4  | 123,629,225 | Intergenic     | -0.19 | $1.62 \times 10^{-10}$ |
|              | rs13129352  | 4  | 123,633,736 | Intergenic     | -0.21 | $7.11 \times 10^{-12}$ |
|              | rs13110096  | 4  | 123,633,932 | Intergenic     | -0.21 | $7.11 \times 10^{-12}$ |
|              | rs368797    | 4  | 123,635,211 | Intergenic     | -0.16 | $8.36 \times 10^{-10}$ |
|              | rs381910    | 4  | 123,635,717 | Intergenic     | -0.16 | $9.75 \times 10^{-10}$ |
|              | rs391783    | 4  | 123,637,725 | Intergenic     | -0.21 | $1.41 \times 10^{-11}$ |
|              | rs309343    | 4  | 123,643,385 | Intergenic     | -0.16 | $8.36 \times 10^{-10}$ |
|              | rs309344    | 4  | 123,644,812 | Intergenic     | -0.21 | $7.11 \times 10^{-12}$ |
|              | rs13120869  | 4  | 123,646,152 | Intergenic     | -0.21 | $7.11 \times 10^{-12}$ |
|              | rs309348    | 4  | 123,646,391 | Intergenic     | -0.16 | $8.36 \times 10^{-10}$ |
|              | rs6845853   | 4  | 123,648,601 | Intergenic     | -0.16 | $4.62 \times 10^{-9}$  |
|              | rs309355    | 4  | 123,652,029 | <i>CETN4P</i>  | -0.21 | $1.11 \times 10^{-12}$ |
|              | rs13138426  | 4  | 123,652,580 | <i>CETN4P</i>  | -0.21 | $7.11 \times 10^{-12}$ |
|              | rs309357    | 4  | 123,653,576 | <i>CETN4P</i>  | -0.16 | $8.36 \times 10^{-10}$ |
|              | rs309358    | 4  | 123,653,926 | <i>BBS12</i>   | -0.21 | $7.11 \times 10^{-12}$ |
|              | rs309359    | 4  | 123,654,522 | <i>BBS12</i>   | -0.16 | $1.65 \times 10^{-9}$  |
|              | rs1512975   | 4  | 123,657,342 | <i>BBS12</i>   | -0.21 | $7.11 \times 10^{-12}$ |
|              | rs309361    | 4  | 123,657,978 | <i>BBS12</i>   | -0.21 | $6.73 \times 10^{-12}$ |
|              | rs309362    | 4  | 123,658,154 | <i>BBS12</i>   | -0.21 | $7.11 \times 10^{-12}$ |
|              | rs309363    | 4  | 123,658,169 | <i>BBS12</i>   | -0.21 | $5.47 \times 10^{-12}$ |

|            |   |             |              |       |                        |
|------------|---|-------------|--------------|-------|------------------------|
| rs309364   | 4 | 123,658,859 | <i>BBS12</i> | -0.21 | $5.47 \times 10^{-12}$ |
| rs309365   | 4 | 123,659,343 | <i>BBS12</i> | -0.21 | $7.11 \times 10^{-12}$ |
| rs309366   | 4 | 123,661,408 | <i>BBS12</i> | -0.21 | $5.47 \times 10^{-12}$ |
| rs309367   | 4 | 123,662,211 | <i>BBS12</i> | -0.21 | $5.47 \times 10^{-12}$ |
| rs444145   | 4 | 123,662,583 | <i>BBS12</i> | -0.21 | $4.36 \times 10^{-12}$ |
| rs439110   | 4 | 123,662,586 | <i>BBS12</i> | -0.21 | $6.41 \times 10^{-12}$ |
| rs309368   | 4 | 123,662,997 | <i>BBS12</i> | -0.21 | $7.11 \times 10^{-12}$ |
| rs309370   | 4 | 123,664,204 | <i>BBS12</i> | -0.16 | $1.24 \times 10^{-9}$  |
| rs13135766 | 4 | 123,664,427 | <i>BBS12</i> | -0.21 | $4.33 \times 10^{-12}$ |
| rs13135778 | 4 | 123,664,446 | <i>BBS12</i> | -0.21 | $7.11 \times 10^{-12}$ |
| rs13135445 | 4 | 123,664,457 | <i>BBS12</i> | -0.22 | $5.16 \times 10^{-14}$ |
| rs13102440 | 4 | 123,664,919 | <i>BBS12</i> | -0.21 | $7.11 \times 10^{-12}$ |
| rs309386   | 4 | 123,665,991 | <i>BBS12</i> | -0.16 | $9.55 \times 10^{-10}$ |
| rs7690409  | 4 | 123,666,757 | Intergenic   | -0.16 | $1.41 \times 10^{-9}$  |
| rs309385   | 4 | 123,666,760 | Intergenic   | -0.16 | $1.41 \times 10^{-9}$  |
| rs12644866 | 4 | 123,667,604 | Intergenic   | -0.16 | $9.55 \times 10^{-10}$ |
| rs309384   | 4 | 123,668,300 | Intergenic   | -0.16 | $9.55 \times 10^{-10}$ |
| rs309382   | 4 | 123,669,772 | Intergenic   | -0.16 | $9.55 \times 10^{-10}$ |
| rs13117125 | 4 | 123,670,824 | Intergenic   | -0.16 | $9.55 \times 10^{-10}$ |
| rs13122636 | 4 | 123,671,045 | Intergenic   | -0.16 | $9.55 \times 10^{-10}$ |
| rs13146929 | 4 | 123,671,151 | Intergenic   | -0.21 | $7.11 \times 10^{-12}$ |
| rs309379   | 4 | 123,671,456 | Intergenic   | -0.16 | $9.55 \times 10^{-10}$ |
| rs6811183  | 4 | 123,671,551 | Intergenic   | -0.16 | $4.12 \times 10^{-10}$ |
| rs9990804  | 4 | 123,671,984 | Intergenic   | -0.16 | $9.55 \times 10^{-10}$ |
| rs13103818 | 4 | 123,672,516 | Intergenic   | -0.16 | $4.12 \times 10^{-10}$ |
| rs10016979 | 4 | 123,673,192 | Intergenic   | -0.16 | $9.55 \times 10^{-10}$ |
| rs7690133  | 4 | 123,673,809 | Intergenic   | -0.16 | $1.28 \times 10^{-9}$  |
| rs7673455  | 4 | 123,674,034 | Intergenic   | -0.16 | $9.55 \times 10^{-10}$ |
| rs7695379  | 4 | 123,674,099 | Intergenic   | -0.15 | $5.27 \times 10^{-9}$  |
| rs67050821 | 4 | 123,674,383 | Intergenic   | -0.21 | $7.11 \times 10^{-12}$ |
| rs1849430  | 4 | 123,674,701 | Intergenic   | -0.16 | $9.55 \times 10^{-10}$ |
| rs1849431  | 4 | 123,674,762 | Intergenic   | -0.16 | $9.55 \times 10^{-10}$ |
| rs13138520 | 4 | 123,675,483 | Intergenic   | -0.21 | $7.11 \times 10^{-12}$ |
| rs309377   | 4 | 123,676,353 | Intergenic   | -0.16 | $9.55 \times 10^{-10}$ |
| rs6815982  | 4 | 123,677,472 | Intergenic   | -0.22 | $5.16 \times 10^{-14}$ |
| rs4833255  | 4 | 123,678,231 | Intergenic   | -0.16 | $1.24 \times 10^{-9}$  |
| rs4833256  | 4 | 123,678,289 | Intergenic   | -0.16 | $1.24 \times 10^{-9}$  |
| rs13142203 | 4 | 123,679,002 | Intergenic   | -0.24 | $1.54 \times 10^{-15}$ |
| rs6853540  | 4 | 123,679,848 | Intergenic   | -0.24 | $1.72 \times 10^{-15}$ |
| rs2034460  | 4 | 123,679,913 | Intergenic   | -0.17 | $7.12 \times 10^{-11}$ |
| rs309376   | 4 | 123,680,191 | Intergenic   | -0.17 | $7.12 \times 10^{-11}$ |
| rs309372   | 4 | 123,682,639 | Intergenic   | -0.17 | $7.12 \times 10^{-11}$ |
| rs34518400 | 4 | 123,684,778 | Intergenic   | -0.22 | $3.07 \times 10^{-13}$ |
| rs11737284 | 4 | 123,688,888 | Intergenic   | -0.23 | $5.76 \times 10^{-14}$ |
| rs2122307  | 4 | 123,688,968 | Intergenic   | -0.23 | $3.64 \times 10^{-16}$ |
| rs10084869 | 4 | 123,696,907 | Intergenic   | -0.23 | $6.72 \times 10^{-16}$ |
| rs10019442 | 4 | 123,700,613 | Intergenic   | -0.23 | $2.69 \times 10^{-16}$ |
| rs10019552 | 4 | 123,700,726 | Intergenic   | -0.22 | $1.30 \times 10^{-14}$ |
| rs13102478 | 4 | 123,702,041 | Intergenic   | -0.23 | $1.85 \times 10^{-14}$ |

|             |             |    |             |                  |       |                        |
|-------------|-------------|----|-------------|------------------|-------|------------------------|
|             | rs13108771  | 4  | 123,706,024 | Intergenic       | -0.23 | $2.07 \times 10^{-14}$ |
|             | rs71631415  | 4  | 123,707,721 | Intergenic       | -0.24 | $1.35 \times 10^{-16}$ |
|             | rs13122694  | 4  | 123,707,937 | Intergenic       | -0.24 | $1.35 \times 10^{-16}$ |
|             | rs13130243  | 4  | 123,708,911 | Intergenic       | -0.23 | $3.79 \times 10^{-16}$ |
|             | rs13138349  | 4  | 123,710,297 | Intergenic       | -0.23 | $1.85 \times 10^{-14}$ |
|             | rs7673491   | 4  | 123,710,875 | Intergenic       | -0.23 | $2.69 \times 10^{-16}$ |
|             | rs13145003  | 4  | 123,711,260 | Intergenic       | -0.23 | $2.69 \times 10^{-16}$ |
|             | rs10005301  | 4  | 123,715,055 | Intergenic       | -0.23 | $2.69 \times 10^{-16}$ |
|             | rs732676    | 4  | 123,717,476 | Intergenic       | -0.24 | $1.35 \times 10^{-16}$ |
|             | rs34518478  | 4  | 123,719,999 | Intergenic       | -0.23 | $1.85 \times 10^{-14}$ |
|             | rs13127908  | 4  | 123,720,933 | Intergenic       | -0.24 | $1.35 \times 10^{-16}$ |
|             | rs13128246  | 4  | 123,721,306 | Intergenic       | -0.23 | $1.85 \times 10^{-14}$ |
|             | rs7678199   | 4  | 123,724,239 | Intergenic       | -0.23 | $1.40 \times 10^{-15}$ |
|             | rs308447    | 4  | 123,738,546 | Intergenic       | -0.20 | $1.54 \times 10^{-13}$ |
|             | rs13137174  | 4  | 123,739,937 | Intergenic       | -0.23 | $4.01 \times 10^{-14}$ |
|             | rs308393    | 4  | 123,746,619 | Intergenic       | -0.19 | $2.94 \times 10^{-8}$  |
|             | rs2922979   | 4  | 123,748,616 | <i>FGF2</i>      | -0.25 | $4.24 \times 10^{-20}$ |
|             | rs308403    | 4  | 123,757,748 | <i>FGF2</i>      | -0.25 | $1.06 \times 10^{-19}$ |
| <i>FGF8</i> | rs1495371   | 3  | 55,734,673  | <i>ERC2</i>      | 0.11  | $4.47 \times 10^{-8}$  |
|             | rs12763589  | 10 | 134,262,247 | Intergenic       | 0.10  | $1.99 \times 10^{-9}$  |
| <i>FNI</i>  | rs149336594 | 1  | 164,569,576 | <i>PBX1</i>      | 0.68  | $1.26 \times 10^{-8}$  |
|             | rs76084430  | 1  | 164,573,875 | <i>PBX1</i>      | 0.68  | $1.26 \times 10^{-8}$  |
|             | rs76850880  | 1  | 164,574,281 | <i>PBX1</i>      | 0.68  | $1.26 \times 10^{-8}$  |
|             | rs111524522 | 1  | 164,575,599 | <i>PBX1</i>      | 0.68  | $1.26 \times 10^{-8}$  |
|             | rs12127332  | 1  | 164,597,407 | <i>PBX1</i>      | 0.66  | $2.26 \times 10^{-8}$  |
|             | rs7546174   | 1  | 164,995,745 | Intergenic       | 0.62  | $2.57 \times 10^{-8}$  |
|             | rs36113415  | 1  | 167,300,638 | <i>POU2F1</i>    | 0.70  | $9.33 \times 10^{-9}$  |
|             | rs858542    | 1  | 167,467,782 | <i>CD247</i>     | 0.66  | $4.77 \times 10^{-8}$  |
|             | rs7514352   | 1  | 168,355,221 | Intergenic       | 0.64  | $2.24 \times 10^{-8}$  |
|             | rs78578111  | 1  | 171,615,334 | <i>MYOC</i>      | 0.70  | $2.25 \times 10^{-8}$  |
|             | rs72717889  | 1  | 171,656,294 | Intergenic       | 0.72  | $9.11 \times 10^{-9}$  |
|             | rs146228539 | 1  | 171,997,318 | <i>DNM3</i>      | 0.66  | $3.92 \times 10^{-8}$  |
|             | rs75874321  | 1  | 172,002,661 | <i>DNM3</i>      | 0.66  | $3.92 \times 10^{-8}$  |
|             | rs41263724  | 1  | 172,007,376 | <i>DNM3</i>      | 0.66  | $3.92 \times 10^{-8}$  |
|             | rs75531597  | 1  | 172,008,716 | <i>DNM3</i>      | 0.66  | $3.92 \times 10^{-8}$  |
|             | rs79947128  | 1  | 172,011,395 | <i>DNM3</i>      | 0.66  | $3.92 \times 10^{-8}$  |
|             | rs114380887 | 1  | 172,017,490 | <i>DNM3</i>      | 0.66  | $3.92 \times 10^{-8}$  |
|             | rs79946145  | 1  | 172,020,587 | <i>DNM3</i>      | 0.66  | $3.92 \times 10^{-8}$  |
|             | rs186343417 | 1  | 172,025,621 | <i>DNM3</i>      | 0.70  | $1.25 \times 10^{-8}$  |
|             | rs80055675  | 1  | 172,040,839 | <i>DNM3</i>      | 0.66  | $3.92 \times 10^{-8}$  |
|             | rs189271639 | 1  | 172,201,885 | <i>DNM3</i>      | 0.68  | $2.36 \times 10^{-8}$  |
|             | rs79295525  | 1  | 177,978,859 | <i>LOC730102</i> | 0.59  | $2.40 \times 10^{-8}$  |
|             | rs2457581   | 1  | 178,457,349 | Intergenic       | 0.73  | $1.42 \times 10^{-9}$  |
|             | rs3767181   | 1  | 180,152,242 | <i>QSOX1</i>     | 0.74  | $2.91 \times 10^{-9}$  |
|             | rs3753796   | 1  | 180,164,615 | <i>QSOX1</i>     | 0.68  | $3.04 \times 10^{-8}$  |
|             | rs73040489  | 1  | 180,168,206 | <i>FLJ23867</i>  | 0.68  | $3.04 \times 10^{-8}$  |
|             | rs10913945  | 1  | 180,169,108 | <i>FLJ23867</i>  | 0.68  | $3.04 \times 10^{-8}$  |
|             | rs12057162  | 1  | 180,169,949 | Intergenic       | 0.68  | $3.04 \times 10^{-8}$  |
|             | rs41268450  | 1  | 180,945,052 | <i>STX6</i>      | 0.54  | $1.91 \times 10^{-8}$  |

|             |   |             |                   |      |                        |
|-------------|---|-------------|-------------------|------|------------------------|
| rs34246004  | 1 | 181,144,537 | Intergenic        | 0.63 | $4.26 \times 10^{-8}$  |
| rs72735694  | 1 | 184,452,687 | <i>C1orf21</i>    | 0.63 | $4.14 \times 10^{-8}$  |
| rs72735697  | 1 | 184,472,312 | <i>C1orf21</i>    | 0.63 | $4.14 \times 10^{-8}$  |
| rs17379691  | 1 | 184,985,263 | Intergenic        | 0.68 | $7.96 \times 10^{-9}$  |
| rs147713217 | 1 | 185,010,111 | Intergenic        | 0.61 | $3.38 \times 10^{-9}$  |
| rs12563184  | 1 | 187,415,069 | Intergenic        | 0.64 | $5.31 \times 10^{-9}$  |
| rs73067363  | 1 | 187,422,856 | Intergenic        | 0.64 | $5.31 \times 10^{-9}$  |
| rs115715580 | 1 | 187,883,107 | Intergenic        | 0.62 | $1.45 \times 10^{-8}$  |
| rs139575192 | 1 | 187,883,883 | Intergenic        | 0.62 | $1.45 \times 10^{-8}$  |
| rs74924399  | 1 | 187,885,556 | Intergenic        | 0.62 | $1.45 \times 10^{-8}$  |
| rs78858501  | 1 | 187,889,836 | Intergenic        | 0.62 | $1.45 \times 10^{-8}$  |
| rs116022184 | 1 | 187,890,912 | Intergenic        | 0.62 | $1.45 \times 10^{-8}$  |
| rs80341925  | 1 | 187,892,569 | Intergenic        | 0.62 | $1.45 \times 10^{-8}$  |
| rs11802712  | 1 | 187,894,191 | Intergenic        | 0.63 | $1.17 \times 10^{-8}$  |
| rs113828939 | 1 | 187,895,630 | Intergenic        | 0.63 | $1.17 \times 10^{-8}$  |
| rs12071106  | 1 | 187,895,938 | Intergenic        | 0.63 | $1.17 \times 10^{-8}$  |
| rs12126409  | 1 | 187,895,942 | Intergenic        | 0.63 | $1.17 \times 10^{-8}$  |
| rs147819641 | 1 | 187,896,530 | Intergenic        | 0.62 | $2.03 \times 10^{-8}$  |
| rs12084007  | 1 | 187,901,778 | Intergenic        | 0.63 | $1.04 \times 10^{-8}$  |
| rs111688623 | 1 | 191,429,759 | Intergenic        | 0.65 | $2.03 \times 10^{-8}$  |
| rs1936674   | 1 | 192,317,769 | <i>RGS21</i>      | 0.64 | $1.59 \times 10^{-8}$  |
| rs142108784 | 1 | 193,844,681 | Intergenic        | 0.67 | $1.17 \times 10^{-8}$  |
| rs144303499 | 1 | 193,844,682 | Intergenic        | 0.67 | $1.17 \times 10^{-8}$  |
| rs149014981 | 1 | 196,319,931 | <i>KCNT2</i>      | 0.65 | $4.70 \times 10^{-8}$  |
| rs45617133  | 1 | 198,776,670 | Intergenic        | 0.73 | $4.88 \times 10^{-9}$  |
| rs74137227  | 1 | 198,784,306 | <i>MIR181A1HG</i> | 0.73 | $4.88 \times 10^{-9}$  |
| rs11581055  | 1 | 198,785,309 | <i>MIR181A1HG</i> | 0.73 | $4.88 \times 10^{-9}$  |
| rs16843870  | 1 | 198,787,116 | <i>MIR181A1HG</i> | 0.73 | $4.88 \times 10^{-9}$  |
| rs768035    | 1 | 198,792,641 | <i>MIR181A1HG</i> | 0.73 | $4.88 \times 10^{-9}$  |
| rs58313139  | 1 | 198,797,617 | <i>MIR181A1HG</i> | 0.76 | $2.31 \times 10^{-9}$  |
| rs74137228  | 1 | 198,801,630 | <i>MIR181A1HG</i> | 0.74 | $4.78 \times 10^{-9}$  |
| rs4141743   | 1 | 198,807,259 | <i>MIR181A1HG</i> | 0.74 | $4.78 \times 10^{-9}$  |
| rs7550566   | 1 | 198,809,666 | <i>MIR181A1HG</i> | 0.74 | $4.78 \times 10^{-9}$  |
| rs74134903  | 1 | 198,810,628 | <i>MIR181A1HG</i> | 0.74 | $4.78 \times 10^{-9}$  |
| rs74134904  | 1 | 198,810,667 | <i>MIR181A1HG</i> | 0.74 | $4.78 \times 10^{-9}$  |
| rs74134906  | 1 | 198,812,355 | <i>MIR181A1HG</i> | 0.74 | $4.78 \times 10^{-9}$  |
| rs115725120 | 1 | 203,397,372 | Intergenic        | 0.61 | $3.37 \times 10^{-8}$  |
| rs12408558  | 1 | 203,601,502 | <i>ATP2B4</i>     | 0.53 | $4.15 \times 10^{-8}$  |
| rs74434569  | 1 | 204,188,658 | <i>PLEKHA6</i>    | 0.83 | $1.86 \times 10^{-10}$ |
| rs45492196  | 1 | 204,434,438 | <i>PIK3C2B</i>    | 0.69 | $2.08 \times 10^{-8}$  |
| rs12143020  | 1 | 205,897,408 | <i>SLC26A9</i>    | 0.67 | $1.03 \times 10^{-8}$  |
| rs12164617  | 1 | 205,898,644 | <i>SLC26A9</i>    | 0.69 | $5.38 \times 10^{-9}$  |
| rs12135835  | 1 | 205,900,216 | <i>SLC26A9</i>    | 0.69 | $5.38 \times 10^{-9}$  |
| rs41305064  | 1 | 205,902,242 | <i>SLC26A9</i>    | 0.68 | $1.11 \times 10^{-8}$  |
| rs74739480  | 1 | 205,905,276 | <i>SLC26A9</i>    | 0.68 | $1.11 \times 10^{-8}$  |
| rs75422336  | 1 | 205,906,901 | <i>SLC26A9</i>    | 0.68 | $1.11 \times 10^{-8}$  |
| rs79129786  | 1 | 208,212,056 | <i>PLXNA2</i>     | 0.64 | $1.20 \times 10^{-8}$  |
| rs74957903  | 1 | 209,513,968 | Intergenic        | 0.70 | $8.23 \times 10^{-9}$  |
| rs75085117  | 1 | 209,514,761 | Intergenic        | 0.70 | $8.23 \times 10^{-9}$  |

|             |   |             |                      |      |                        |
|-------------|---|-------------|----------------------|------|------------------------|
| rs79126955  | 1 | 211,671,409 | Intergenic           | 0.67 | $4.26 \times 10^{-8}$  |
| rs75347938  | 1 | 215,047,801 | Intergenic           | 0.69 | $2.22 \times 10^{-8}$  |
| rs17042153  | 1 | 215,051,178 | Intergenic           | 0.69 | $2.22 \times 10^{-8}$  |
| rs186460432 | 1 | 215,052,747 | Intergenic           | 0.69 | $2.22 \times 10^{-8}$  |
| rs141218710 | 1 | 215,053,983 | Intergenic           | 0.69 | $2.22 \times 10^{-8}$  |
| rs17023610  | 1 | 215,059,554 | Intergenic           | 0.69 | $2.22 \times 10^{-8}$  |
| rs79590827  | 1 | 215,062,744 | Intergenic           | 0.69 | $2.22 \times 10^{-8}$  |
| rs76009568  | 1 | 215,063,753 | Intergenic           | 0.69 | $2.22 \times 10^{-8}$  |
| rs1336948   | 1 | 215,068,688 | Intergenic           | 0.69 | $2.22 \times 10^{-8}$  |
| rs17023635  | 1 | 215,069,367 | Intergenic           | 0.69 | $2.22 \times 10^{-8}$  |
| rs114335567 | 1 | 215,071,242 | Intergenic           | 0.69 | $2.22 \times 10^{-8}$  |
| rs138291070 | 1 | 216,935,692 | <i>ESRRG</i>         | 0.59 | $1.22 \times 10^{-8}$  |
| rs78488479  | 1 | 219,610,897 | Intergenic           | 0.69 | $2.43 \times 10^{-9}$  |
| rs77739064  | 1 | 219,653,292 | Intergenic           | 0.82 | $3.67 \times 10^{-11}$ |
| rs77135156  | 1 | 222,965,534 | Intergenic           | 0.67 | $4.77 \times 10^{-8}$  |
| rs59615821  | 1 | 225,025,480 | Intergenic           | 0.68 | $8.00 \times 10^{-9}$  |
| rs74935577  | 1 | 228,994,317 | Intergenic           | 0.67 | $3.73 \times 10^{-8}$  |
| rs12037495  | 1 | 229,838,715 | Intergenic           | 0.67 | $4.75 \times 10^{-9}$  |
| rs74142810  | 1 | 229,839,317 | Intergenic           | 0.67 | $4.75 \times 10^{-9}$  |
| rs12044686  | 1 | 229,843,408 | Intergenic           | 0.65 | $8.67 \times 10^{-9}$  |
| rs16850138  | 1 | 229,845,060 | Intergenic           | 0.65 | $8.67 \times 10^{-9}$  |
| rs4847021   | 1 | 230,959,298 | Intergenic           | 0.65 | $1.72 \times 10^{-8}$  |
| rs12407450  | 1 | 230,995,107 | <i>C1orf198</i>      | 0.65 | $2.96 \times 10^{-8}$  |
| rs77274688  | 1 | 232,186,522 | Intergenic           | 0.65 | $1.64 \times 10^{-8}$  |
| rs12139739  | 1 | 232,792,783 | Intergenic           | 0.68 | $1.30 \times 10^{-8}$  |
| rs55900018  | 1 | 233,012,675 | Intergenic           | 0.64 | $4.47 \times 10^{-8}$  |
| rs55770257  | 1 | 233,012,803 | Intergenic           | 0.64 | $4.47 \times 10^{-8}$  |
| rs56409532  | 1 | 233,012,991 | Intergenic           | 0.64 | $4.47 \times 10^{-8}$  |
| rs72757855  | 1 | 233,019,044 | Intergenic           | 0.66 | $1.85 \times 10^{-8}$  |
| rs58562010  | 1 | 233,020,507 | Intergenic           | 0.66 | $2.87 \times 10^{-8}$  |
| rs56065775  | 1 | 233,022,255 | Intergenic           | 0.66 | $2.87 \times 10^{-8}$  |
| rs74730468  | 1 | 233,173,214 | <i>PCNXL2</i>        | 0.68 | $3.73 \times 10^{-8}$  |
| rs74506265  | 1 | 233,173,744 | <i>PCNXL2</i>        | 0.68 | $3.73 \times 10^{-8}$  |
| rs4274054   | 1 | 235,779,725 | <i>GNG4</i>          | 0.69 | $1.47 \times 10^{-8}$  |
| rs79379588  | 1 | 238,754,098 | Intergenic           | 0.71 | $2.41 \times 10^{-9}$  |
| rs114571786 | 1 | 238,756,643 | Intergenic           | 0.69 | $3.71 \times 10^{-9}$  |
| rs74728354  | 1 | 238,761,549 | Intergenic           | 0.69 | $3.71 \times 10^{-9}$  |
| rs59627173  | 1 | 238,762,069 | Intergenic           | 0.68 | $4.47 \times 10^{-9}$  |
| rs74985156  | 1 | 238,762,444 | Intergenic           | 0.69 | $3.71 \times 10^{-9}$  |
| rs4659879   | 1 | 238,762,517 | Intergenic           | 0.68 | $4.47 \times 10^{-9}$  |
| rs4659534   | 1 | 238,762,549 | Intergenic           | 0.68 | $4.47 \times 10^{-9}$  |
| rs78318745  | 1 | 238,764,235 | Intergenic           | 0.71 | $2.09 \times 10^{-9}$  |
| rs77760738  | 1 | 238,768,875 | Intergenic           | 0.70 | $2.66 \times 10^{-9}$  |
| rs4659903   | 1 | 239,298,202 | Intergenic           | 0.80 | $2.67 \times 10^{-10}$ |
| rs78278538  | 1 | 239,586,677 | Intergenic           | 0.70 | $9.06 \times 10^{-9}$  |
| rs77665737  | 1 | 243,088,833 | Intergenic           | 0.62 | $3.25 \times 10^{-8}$  |
| rs184276665 | 1 | 245,985,292 | <i>SMYD3</i>         | 0.72 | $9.96 \times 10^{-9}$  |
| rs6672861   | 1 | 247,025,738 | <i>AHCTF1</i>        | 0.58 | $6.97 \times 10^{-10}$ |
| rs10888281  | 1 | 248,113,026 | <i>OR2L8; OR2L13</i> | 0.67 | $3.05 \times 10^{-8}$  |

|             |   |             |                |      |                        |
|-------------|---|-------------|----------------|------|------------------------|
| rs3927659   | 1 | 248,115,884 | <i>OR2L13</i>  | 0.75 | $1.97 \times 10^{-9}$  |
| rs138688946 | 1 | 248,121,566 | <i>OR2L13</i>  | 0.67 | $2.53 \times 10^{-8}$  |
| rs6587408   | 1 | 248,122,312 | <i>OR2L13</i>  | 0.74 | $3.29 \times 10^{-9}$  |
| rs116660969 | 1 | 248,232,035 | <i>OR2L13</i>  | 0.70 | $7.40 \times 10^{-9}$  |
| rs146005063 | 1 | 248,232,075 | <i>OR2L13</i>  | 0.70 | $7.40 \times 10^{-9}$  |
| rs4471301   | 1 | 248,232,530 | <i>OR2L13</i>  | 0.71 | $8.48 \times 10^{-9}$  |
| rs115484985 | 1 | 248,233,073 | <i>OR2L13</i>  | 0.81 | $3.97 \times 10^{-10}$ |
| rs188697725 | 1 | 248,236,523 | <i>OR2L13</i>  | 0.73 | $4.52 \times 10^{-9}$  |
| rs193191589 | 1 | 248,236,524 | <i>OR2L13</i>  | 0.73 | $4.52 \times 10^{-9}$  |
| rs140976623 | 1 | 248,238,987 | <i>OR2L13</i>  | 0.79 | $7.06 \times 10^{-10}$ |
| rs145052285 | 1 | 248,239,012 | <i>OR2L13</i>  | 0.79 | $7.06 \times 10^{-10}$ |
| rs12611657  | 2 | 11,110,986  | Intergenic     | 0.70 | $1.14 \times 10^{-8}$  |
| rs13023820  | 2 | 47,143,052  | <i>MCFD2</i>   | 0.68 | $1.60 \times 10^{-8}$  |
| rs35073682  | 2 | 73,273,059  | <i>SFXN5</i>   | 0.63 | $3.22 \times 10^{-8}$  |
| rs56170128  | 2 | 111,742,068 | <i>ACOXL</i>   | 0.67 | $2.84 \times 10^{-8}$  |
| rs72834562  | 2 | 111,745,313 | <i>ACOXL</i>   | 0.67 | $2.84 \times 10^{-8}$  |
| rs76056446  | 2 | 111,747,449 | <i>ACOXL</i>   | 0.67 | $2.84 \times 10^{-8}$  |
| rs67234811  | 2 | 111,748,471 | <i>ACOXL</i>   | 0.67 | $2.84 \times 10^{-8}$  |
| rs72834571  | 2 | 111,750,743 | <i>ACOXL</i>   | 0.67 | $2.84 \times 10^{-8}$  |
| rs72834576  | 2 | 111,754,545 | <i>ACOXL</i>   | 0.67 | $2.84 \times 10^{-8}$  |
| rs72834578  | 2 | 111,755,381 | <i>ACOXL</i>   | 0.67 | $2.84 \times 10^{-8}$  |
| rs67250604  | 2 | 111,756,913 | <i>ACOXL</i>   | 0.67 | $2.84 \times 10^{-8}$  |
| rs72834584  | 2 | 111,757,071 | <i>ACOXL</i>   | 0.67 | $2.84 \times 10^{-8}$  |
| rs66509834  | 2 | 111,757,099 | <i>ACOXL</i>   | 0.67 | $2.84 \times 10^{-8}$  |
| rs1384791   | 2 | 111,757,442 | <i>ACOXL</i>   | 0.67 | $2.84 \times 10^{-8}$  |
| rs59486976  | 2 | 111,762,409 | <i>ACOXL</i>   | 0.67 | $2.84 \times 10^{-8}$  |
| rs68080118  | 2 | 111,763,417 | <i>ACOXL</i>   | 0.67 | $2.84 \times 10^{-8}$  |
| rs72834594  | 2 | 111,764,337 | <i>ACOXL</i>   | 0.67 | $2.84 \times 10^{-8}$  |
| rs72946240  | 2 | 111,764,395 | <i>ACOXL</i>   | 0.67 | $2.84 \times 10^{-8}$  |
| rs72834595  | 2 | 111,765,336 | <i>ACOXL</i>   | 0.67 | $2.84 \times 10^{-8}$  |
| rs1384794   | 2 | 111,768,193 | <i>ACOXL</i>   | 0.67 | $2.84 \times 10^{-8}$  |
| rs7420839   | 2 | 111,768,423 | <i>ACOXL</i>   | 0.67 | $2.84 \times 10^{-8}$  |
| rs55833189  | 2 | 111,768,485 | <i>ACOXL</i>   | 0.67 | $2.84 \times 10^{-8}$  |
| rs6730256   | 2 | 111,771,811 | <i>ACOXL</i>   | 0.67 | $2.84 \times 10^{-8}$  |
| rs56105404  | 2 | 111,771,893 | <i>ACOXL</i>   | 0.67 | $2.84 \times 10^{-8}$  |
| rs61145952  | 2 | 111,777,279 | <i>ACOXL</i>   | 0.67 | $2.84 \times 10^{-8}$  |
| rs75932453  | 2 | 145,086,473 | <i>GTDC1</i>   | 0.67 | $3.64 \times 10^{-8}$  |
| rs115578534 | 2 | 145,118,293 | Intergenic     | 0.72 | $7.06 \times 10^{-9}$  |
| rs114878534 | 2 | 145,120,773 | Intergenic     | 0.69 | $1.91 \times 10^{-8}$  |
| rs13024167  | 2 | 216,146,204 | Intergenic     | 0.66 | $3.08 \times 10^{-8}$  |
| rs76447806  | 3 | 62,507,973  | <i>CADPS</i>   | 0.58 | $3.41 \times 10^{-8}$  |
| rs2568839   | 3 | 71,274,820  | <i>FOXP1</i>   | 0.70 | $1.03 \times 10^{-8}$  |
| rs189283961 | 3 | 79,898,011  | Intergenic     | 0.61 | $8.59 \times 10^{-9}$  |
| rs9883715   | 3 | 129,123,803 | <i>EFCAB12</i> | 0.78 | $6.35 \times 10^{-11}$ |
| rs6794947   | 3 | 130,934,108 | <i>NEK11</i>   | 0.64 | $1.97 \times 10^{-8}$  |
| rs6807331   | 3 | 130,934,115 | <i>NEK11</i>   | 0.68 | $6.34 \times 10^{-9}$  |
| rs6794775   | 3 | 130,934,122 | <i>NEK11</i>   | 0.70 | $2.20 \times 10^{-9}$  |
| rs13078961  | 3 | 137,687,685 | Intergenic     | 0.68 | $1.43 \times 10^{-8}$  |
| rs9831917   | 3 | 144,108,879 | Intergenic     | 0.74 | $7.87 \times 10^{-9}$  |



|             |   |             |               |      |                        |
|-------------|---|-------------|---------------|------|------------------------|
| rs139990714 | 3 | 148,709,130 | Intergenic    | 0.72 | $5.98 \times 10^{-9}$  |
| rs73866929  | 3 | 148,710,123 | <i>GYGI</i>   | 0.75 | $2.22 \times 10^{-9}$  |
| rs6776112   | 3 | 148,710,903 | <i>GYGI</i>   | 0.75 | $2.22 \times 10^{-9}$  |
| rs59698464  | 3 | 148,714,887 | <i>GYGI</i>   | 0.75 | $2.22 \times 10^{-9}$  |
| rs58928967  | 3 | 148,715,114 | <i>GYGI</i>   | 0.75 | $2.22 \times 10^{-9}$  |
| rs7647629   | 3 | 148,820,658 | Intergenic    | 0.75 | $2.22 \times 10^{-9}$  |
| rs57249105  | 3 | 149,792,830 | Intergenic    | 0.63 | $1.89 \times 10^{-8}$  |
| rs66547256  | 3 | 149,795,863 | Intergenic    | 0.63 | $1.89 \times 10^{-8}$  |
| rs73157086  | 3 | 149,796,120 | Intergenic    | 0.63 | $1.89 \times 10^{-8}$  |
| rs67452147  | 3 | 149,796,705 | Intergenic    | 0.63 | $1.89 \times 10^{-8}$  |
| rs57649841  | 3 | 149,797,370 | Intergenic    | 0.76 | $4.31 \times 10^{-10}$ |
| rs6440647   | 3 | 149,801,354 | Intergenic    | 0.63 | $7.89 \times 10^{-9}$  |
| rs60629227  | 3 | 149,804,510 | Intergenic    | 0.61 | $1.70 \times 10^{-8}$  |
| rs7637247   | 3 | 149,807,158 | Intergenic    | 0.63 | $8.36 \times 10^{-9}$  |
| rs17423099  | 4 | 11,414,095  | <i>HS3ST1</i> | 0.72 | $2.54 \times 10^{-9}$  |
| rs13135334  | 4 | 14,798,393  | Intergenic    | 0.66 | $2.38 \times 10^{-9}$  |
| rs73806008  | 4 | 27,936,017  | Intergenic    | 0.58 | $3.11 \times 10^{-8}$  |
| rs3978140   | 4 | 132,645,886 | Intergenic    | 0.69 | $1.33 \times 10^{-8}$  |
| rs150051783 | 4 | 160,444,249 | Intergenic    | 0.67 | $5.66 \times 10^{-9}$  |
| rs10214354  | 5 | 114,015,002 | Intergenic    | 0.65 | $2.03 \times 10^{-8}$  |
| rs78503839  | 5 | 120,484,882 | Intergenic    | 0.61 | $1.83 \times 10^{-8}$  |
| rs6887838   | 5 | 121,109,221 | Intergenic    | 0.67 | $4.42 \times 10^{-9}$  |
| rs73791866  | 5 | 121,109,539 | Intergenic    | 0.67 | $4.42 \times 10^{-9}$  |
| rs56013991  | 5 | 121,110,001 | Intergenic    | 0.67 | $4.42 \times 10^{-9}$  |
| rs7723698   | 5 | 145,453,133 | Intergenic    | 0.67 | $4.76 \times 10^{-8}$  |
| rs138516705 | 5 | 145,620,060 | <i>RBM27</i>  | 0.69 | $2.86 \times 10^{-8}$  |
| rs56667063  | 5 | 164,982,360 | Intergenic    | 0.66 | $2.19 \times 10^{-8}$  |
| rs73344225  | 5 | 164,989,490 | Intergenic    | 0.64 | $3.27 \times 10^{-8}$  |
| rs112571602 | 6 | 15,218,273  | Intergenic    | 0.60 | $4.33 \times 10^{-9}$  |
| rs115649989 | 6 | 32,431,488  | Intergenic    | 0.63 | $4.71 \times 10^{-8}$  |
| rs10948332  | 6 | 47,081,781  | Intergenic    | 0.66 | $2.51 \times 10^{-8}$  |
| rs74769936  | 6 | 47,322,096  | Intergenic    | 0.58 | $3.15 \times 10^{-8}$  |
| rs9369677   | 6 | 47,323,254  | Intergenic    | 0.69 | $1.03 \times 10^{-9}$  |
| rs9381536   | 6 | 47,325,161  | Intergenic    | 0.63 | $7.12 \times 10^{-9}$  |
| rs9296545   | 6 | 47,325,611  | Intergenic    | 0.69 | $1.03 \times 10^{-9}$  |
| rs7741773   | 6 | 47,327,079  | Intergenic    | 0.69 | $1.03 \times 10^{-9}$  |
| rs9369678   | 6 | 47,332,915  | Intergenic    | 0.56 | $4.65 \times 10^{-8}$  |
| rs9381542   | 6 | 47,334,713  | Intergenic    | 0.56 | $4.65 \times 10^{-8}$  |
| rs12661444  | 6 | 47,335,216  | Intergenic    | 0.56 | $4.65 \times 10^{-8}$  |
| rs4422623   | 6 | 47,344,280  | Intergenic    | 0.56 | $4.92 \times 10^{-8}$  |
| rs9369680   | 6 | 47,345,591  | Intergenic    | 0.58 | $2.80 \times 10^{-8}$  |
| rs9395253   | 6 | 47,348,783  | Intergenic    | 0.56 | $4.92 \times 10^{-8}$  |
| rs77652558  | 6 | 47,488,433  | <i>CD2AP</i>  | 0.69 | $6.25 \times 10^{-9}$  |
| rs76152299  | 6 | 47,542,679  | <i>CD2AP</i>  | 0.67 | $1.28 \times 10^{-8}$  |
| rs72873836  | 6 | 49,602,190  | <i>RHAG</i>   | 0.67 | $4.93 \times 10^{-9}$  |
| rs151062730 | 6 | 49,760,770  | Intergenic    | 0.66 | $3.02 \times 10^{-8}$  |
| rs35289230  | 6 | 84,718,901  | Intergenic    | 0.70 | $2.64 \times 10^{-8}$  |
| rs10455443  | 6 | 86,018,723  | Intergenic    | 0.65 | $2.49 \times 10^{-8}$  |
| rs71570828  | 6 | 117,224,212 | <i>RFX6</i>   | 0.63 | $1.60 \times 10^{-8}$  |

|             |   |             |                |      |                        |
|-------------|---|-------------|----------------|------|------------------------|
| rs17210773  | 6 | 117,271,489 | Intergenic     | 0.60 | $3.08 \times 10^{-8}$  |
| rs13212970  | 6 | 117,417,056 | Intergenic     | 0.59 | $4.34 \times 10^{-8}$  |
| rs144514109 | 6 | 128,619,539 | <i>PTPRK</i>   | 0.62 | $3.13 \times 10^{-8}$  |
| rs62425725  | 6 | 128,742,089 | <i>PTPRK</i>   | 0.65 | $2.15 \times 10^{-8}$  |
| rs72990913  | 6 | 129,455,490 | <i>LAMA2</i>   | 0.76 | $9.17 \times 10^{-10}$ |
| rs62428442  | 6 | 133,286,067 | Intergenic     | 0.61 | $4.97 \times 10^{-8}$  |
| rs77748084  | 6 | 144,048,299 | <i>PHACTR2</i> | 0.62 | $1.55 \times 10^{-8}$  |
| rs78228935  | 6 | 144,050,074 | <i>PHACTR2</i> | 0.74 | $7.31 \times 10^{-10}$ |
| rs73579888  | 6 | 144,051,801 | <i>PHACTR2</i> | 0.74 | $7.31 \times 10^{-10}$ |
| rs112853525 | 6 | 144,052,488 | <i>PHACTR2</i> | 0.74 | $7.31 \times 10^{-10}$ |
| rs111412914 | 6 | 144,052,585 | <i>PHACTR2</i> | 0.72 | $1.30 \times 10^{-9}$  |
| rs77297840  | 6 | 144,094,414 | <i>PHACTR2</i> | 0.75 | $5.48 \times 10^{-10}$ |
| rs7453812   | 6 | 153,405,199 | <i>RGS17</i>   | 0.71 | $6.24 \times 10^{-9}$  |
| rs76779653  | 6 | 161,608,252 | <i>AGPAT4</i>  | 0.58 | $2.22 \times 10^{-8}$  |
| rs118093961 | 6 | 161,634,420 | <i>AGPAT4</i>  | 0.74 | $2.76 \times 10^{-10}$ |
| rs62447743  | 7 | 9,039,330   | Intergenic     | 0.76 | $3.88 \times 10^{-10}$ |
| rs75967089  | 7 | 9,071,034   | Intergenic     | 0.70 | $1.17 \times 10^{-8}$  |
| rs62438781  | 7 | 9,072,918   | Intergenic     | 0.67 | $2.39 \times 10^{-8}$  |
| rs7799292   | 7 | 9,250,808   | Intergenic     | 0.60 | $4.54 \times 10^{-8}$  |
| rs78165033  | 7 | 9,262,726   | Intergenic     | 0.63 | $2.94 \times 10^{-8}$  |
| rs75380079  | 7 | 70,118,887  | <i>AUTS2</i>   | 0.65 | $3.36 \times 10^{-8}$  |
| rs117449388 | 7 | 71,865,742  | <i>CALN1</i>   | 0.66 | $3.13 \times 10^{-8}$  |
| rs73137258  | 7 | 78,461,166  | <i>MAGI2</i>   | 0.56 | $8.70 \times 10^{-9}$  |
| rs113886669 | 7 | 78,462,096  | <i>MAGI2</i>   | 0.58 | $5.70 \times 10^{-9}$  |
| rs73137287  | 7 | 78,468,543  | <i>MAGI2</i>   | 0.57 | $8.87 \times 10^{-9}$  |
| rs17455327  | 7 | 78,469,638  | <i>MAGI2</i>   | 0.57 | $8.87 \times 10^{-9}$  |
| rs73137294  | 7 | 78,472,503  | <i>MAGI2</i>   | 0.57 | $8.87 \times 10^{-9}$  |
| rs6951658   | 7 | 78,474,434  | <i>MAGI2</i>   | 0.57 | $8.87 \times 10^{-9}$  |
| rs6951989   | 7 | 78,474,634  | <i>MAGI2</i>   | 0.57 | $8.87 \times 10^{-9}$  |
| rs17390355  | 7 | 78,479,384  | <i>MAGI2</i>   | 0.57 | $8.87 \times 10^{-9}$  |
| rs73143027  | 7 | 78,479,732  | <i>MAGI2</i>   | 0.57 | $8.87 \times 10^{-9}$  |
| rs117038961 | 7 | 78,482,899  | <i>MAGI2</i>   | 0.54 | $2.43 \times 10^{-8}$  |
| rs6957268   | 7 | 78,484,313  | <i>MAGI2</i>   | 0.54 | $2.43 \times 10^{-8}$  |
| rs141650299 | 7 | 78,484,930  | <i>MAGI2</i>   | 0.54 | $2.43 \times 10^{-8}$  |
| rs142475793 | 7 | 78,486,327  | <i>MAGI2</i>   | 0.54 | $2.43 \times 10^{-8}$  |
| rs117190204 | 7 | 78,488,499  | <i>MAGI2</i>   | 0.54 | $2.43 \times 10^{-8}$  |
| rs73143039  | 7 | 78,492,050  | <i>MAGI2</i>   | 0.54 | $2.43 \times 10^{-8}$  |
| rs73143040  | 7 | 78,492,107  | <i>MAGI2</i>   | 0.54 | $2.43 \times 10^{-8}$  |
| rs73143043  | 7 | 78,494,960  | <i>MAGI2</i>   | 0.54 | $2.43 \times 10^{-8}$  |
| rs138002846 | 7 | 78,498,316  | <i>MAGI2</i>   | 0.53 | $3.58 \times 10^{-8}$  |
| rs73143055  | 7 | 78,499,447  | <i>MAGI2</i>   | 0.54 | $2.43 \times 10^{-8}$  |
| rs150944644 | 7 | 78,500,502  | <i>MAGI2</i>   | 0.54 | $2.43 \times 10^{-8}$  |
| rs73143059  | 7 | 78,501,805  | <i>MAGI2</i>   | 0.54 | $2.43 \times 10^{-8}$  |
| rs73143070  | 7 | 78,504,838  | <i>MAGI2</i>   | 0.54 | $2.43 \times 10^{-8}$  |
| rs73143084  | 7 | 78,509,543  | <i>MAGI2</i>   | 0.54 | $2.43 \times 10^{-8}$  |
| rs113459111 | 7 | 78,510,769  | <i>MAGI2</i>   | 0.53 | $3.18 \times 10^{-8}$  |
| rs7789403   | 7 | 78,513,786  | <i>MAGI2</i>   | 0.55 | $1.51 \times 10^{-8}$  |
| rs7790077   | 7 | 78,514,243  | <i>MAGI2</i>   | 0.56 | $1.17 \times 10^{-8}$  |
| rs73144911  | 7 | 78,514,783  | <i>MAGI2</i>   | 0.56 | $1.17 \times 10^{-8}$  |

|             |    |             |                  |      |                        |
|-------------|----|-------------|------------------|------|------------------------|
| rs7801273   | 7  | 78,517,523  | <i>MAGI2</i>     | 0.55 | $1.81 \times 10^{-8}$  |
| rs138424419 | 7  | 78,518,070  | <i>MAGI2</i>     | 0.55 | $1.81 \times 10^{-8}$  |
| rs145334411 | 7  | 78,520,514  | <i>MAGI2</i>     | 0.55 | $1.81 \times 10^{-8}$  |
| rs111296157 | 7  | 78,523,064  | <i>MAGI2</i>     | 0.55 | $1.81 \times 10^{-8}$  |
| rs73144917  | 7  | 78,525,452  | <i>MAGI2</i>     | 0.56 | $1.17 \times 10^{-8}$  |
| rs17469166  | 7  | 78,528,822  | <i>MAGI2</i>     | 0.55 | $1.38 \times 10^{-8}$  |
| rs17151649  | 7  | 78,537,119  | <i>MAGI2</i>     | 0.54 | $1.98 \times 10^{-8}$  |
| rs12112897  | 7  | 78,537,885  | <i>MAGI2</i>     | 0.53 | $3.32 \times 10^{-8}$  |
| rs73173756  | 7  | 101,014,050 | <i>COL26A1</i>   | 0.65 | $7.52 \times 10^{-9}$  |
| rs17643058  | 8  | 18,354,207  | Intergenic       | 0.64 | $3.30 \times 10^{-8}$  |
| rs79160222  | 8  | 18,358,216  | Intergenic       | 0.64 | $3.55 \times 10^{-8}$  |
| rs10097130  | 8  | 58,071,298  | Intergenic       | 0.67 | $1.03 \times 10^{-8}$  |
| rs2733726   | 8  | 77,727,127  | <i>ZFHX4</i>     | 0.63 | $9.12 \times 10^{-9}$  |
| rs2733727   | 8  | 77,727,516  | <i>ZFHX4</i>     | 0.63 | $9.12 \times 10^{-9}$  |
| rs76060276  | 8  | 77,737,131  | <i>ZFHX4</i>     | 0.62 | $9.58 \times 10^{-9}$  |
| rs78040517  | 8  | 89,819,870  | Intergenic       | 0.80 | $8.47 \times 10^{-11}$ |
| rs139191195 | 8  | 101,640,398 | <i>SNX31</i>     | 0.68 | $3.58 \times 10^{-8}$  |
| rs13282227  | 8  | 135,467,446 | Intergenic       | 0.69 | $2.48 \times 10^{-10}$ |
| rs77317861  | 8  | 136,303,364 | <i>LOC286094</i> | 0.65 | $1.38 \times 10^{-8}$  |
| rs111656004 | 8  | 142,211,156 | Intergenic       | 0.63 | $2.39 \times 10^{-8}$  |
| rs7860723   | 9  | 6,656,619   | Intergenic       | 0.61 | $2.89 \times 10^{-8}$  |
| rs112382558 | 9  | 6,657,785   | Intergenic       | 0.61 | $2.89 \times 10^{-8}$  |
| rs117253196 | 9  | 18,416,216  | Intergenic       | 0.71 | $9.57 \times 10^{-9}$  |
| rs115108225 | 9  | 21,594,061  | Intergenic       | 0.69 | $2.48 \times 10^{-8}$  |
| rs34331573  | 9  | 31,989,742  | Intergenic       | 0.64 | $3.34 \times 10^{-8}$  |
| rs116897696 | 9  | 78,896,852  | <i>PCSK5</i>     | 0.65 | $3.93 \times 10^{-8}$  |
| rs11139445  | 9  | 84,485,690  | Intergenic       | 0.58 | $1.40 \times 10^{-8}$  |
| rs1323769   | 9  | 85,825,804  | Intergenic       | 0.69 | $1.35 \times 10^{-8}$  |
| rs2378656   | 9  | 85,870,424  | <i>FRMD3</i>     | 0.66 | $3.15 \times 10^{-8}$  |
| rs186328302 | 9  | 108,135,047 | <i>SLC44A1</i>   | 0.73 | $5.06 \times 10^{-10}$ |
| rs151220028 | 9  | 112,096,628 | Intergenic       | 0.70 | $3.24 \times 10^{-9}$  |
| rs972776    | 9  | 112,107,823 | Intergenic       | 0.72 | $1.90 \times 10^{-9}$  |
| rs76067522  | 9  | 129,467,424 | Intergenic       | 0.73 | $6.44 \times 10^{-10}$ |
| rs34778470  | 9  | 129,474,661 | Intergenic       | 0.70 | $1.39 \times 10^{-9}$  |
| rs17593794  | 9  | 138,518,203 | <i>GLT6D1</i>    | 0.60 | $4.94 \times 10^{-8}$  |
| rs187250631 | 10 | 6,840,729   | <i>LINC00707</i> | 0.82 | $7.03 \times 10^{-10}$ |
| rs17339635  | 10 | 14,487,154  | Intergenic       | 0.72 | $9.85 \times 10^{-10}$ |
| rs11033556  | 11 | 4,747,517   | Intergenic       | 0.67 | $2.56 \times 10^{-8}$  |
| rs72923838  | 11 | 34,067,866  | Intergenic       | 0.66 | $3.31 \times 10^{-8}$  |
| rs113897841 | 11 | 34,082,842  | <i>CAPRIN1</i>   | 0.68 | $1.96 \times 10^{-8}$  |
| rs182807187 | 11 | 62,880,585  | <i>SLC22A24</i>  | 0.64 | $8.10 \times 10^{-9}$  |
| rs17149462  | 11 | 68,683,774  | <i>IGHMBP2</i>   | 0.68 | $1.24 \times 10^{-8}$  |
| rs80068116  | 11 | 68,733,360  | Intergenic       | 0.70 | $8.49 \times 10^{-9}$  |
| rs112934532 | 11 | 68,733,800  | Intergenic       | 0.70 | $8.49 \times 10^{-9}$  |
| rs11228432  | 11 | 68,743,990  | Intergenic       | 0.70 | $8.49 \times 10^{-9}$  |
| rs12364038  | 11 | 68,786,138  | Intergenic       | 0.67 | $4.04 \times 10^{-8}$  |
| rs12790927  | 11 | 76,429,796  | <i>GUCY2EP</i>   | 0.65 | $4.06 \times 10^{-8}$  |
| rs150227494 | 11 | 89,431,458  | <i>FOLH1B</i>    | 0.54 | $3.24 \times 10^{-8}$  |
| rs561590    | 11 | 111,047,295 | Intergenic       | 0.68 | $2.38 \times 10^{-8}$  |

|             |    |             |               |      |                       |
|-------------|----|-------------|---------------|------|-----------------------|
| rs112568086 | 12 | 45,461,201  | Intergenic    | 0.59 | $7.59 \times 10^{-9}$ |
| rs117049824 | 12 | 45,464,311  | Intergenic    | 0.59 | $7.59 \times 10^{-9}$ |
| rs56739303  | 12 | 45,465,477  | Intergenic    | 0.59 | $7.59 \times 10^{-9}$ |
| rs74080767  | 12 | 45,469,374  | Intergenic    | 0.59 | $7.59 \times 10^{-9}$ |
| rs78081649  | 12 | 45,469,842  | Intergenic    | 0.59 | $7.59 \times 10^{-9}$ |
| rs117053246 | 12 | 45,474,410  | Intergenic    | 0.59 | $7.59 \times 10^{-9}$ |
| rs117076294 | 12 | 45,476,517  | Intergenic    | 0.59 | $7.59 \times 10^{-9}$ |
| rs118080386 | 12 | 45,476,941  | Intergenic    | 0.59 | $7.59 \times 10^{-9}$ |
| rs150639746 | 12 | 45,478,296  | Intergenic    | 0.59 | $7.59 \times 10^{-9}$ |
| rs118048013 | 12 | 45,485,493  | Intergenic    | 0.59 | $7.59 \times 10^{-9}$ |
| rs56292866  | 12 | 45,489,207  | Intergenic    | 0.59 | $7.59 \times 10^{-9}$ |
| rs74080208  | 12 | 45,490,369  | Intergenic    | 0.59 | $7.59 \times 10^{-9}$ |
| rs74909886  | 12 | 45,492,590  | Intergenic    | 0.59 | $7.59 \times 10^{-9}$ |
| rs117583035 | 12 | 45,493,080  | Intergenic    | 0.59 | $7.59 \times 10^{-9}$ |
| rs75558935  | 12 | 45,494,940  | Intergenic    | 0.59 | $7.59 \times 10^{-9}$ |
| rs74080215  | 12 | 45,496,680  | Intergenic    | 0.59 | $7.59 \times 10^{-9}$ |
| rs2042098   | 12 | 45,496,855  | Intergenic    | 0.57 | $1.45 \times 10^{-8}$ |
| rs116864104 | 12 | 45,497,356  | Intergenic    | 0.59 | $7.59 \times 10^{-9}$ |
| rs74080216  | 12 | 45,498,195  | Intergenic    | 0.59 | $7.59 \times 10^{-9}$ |
| rs79438849  | 12 | 45,498,932  | Intergenic    | 0.59 | $7.59 \times 10^{-9}$ |
| rs75280014  | 12 | 45,499,403  | Intergenic    | 0.59 | $7.59 \times 10^{-9}$ |
| rs75028921  | 12 | 45,499,530  | Intergenic    | 0.57 | $1.45 \times 10^{-8}$ |
| rs12300558  | 12 | 45,499,748  | Intergenic    | 0.57 | $1.45 \times 10^{-8}$ |
| rs12313919  | 12 | 45,500,336  | Intergenic    | 0.57 | $1.45 \times 10^{-8}$ |
| rs78209723  | 12 | 45,501,480  | Intergenic    | 0.57 | $1.45 \times 10^{-8}$ |
| rs12306609  | 12 | 45,503,474  | Intergenic    | 0.58 | $1.06 \times 10^{-8}$ |
| rs79113099  | 12 | 45,504,359  | Intergenic    | 0.60 | $5.39 \times 10^{-9}$ |
| rs7969620   | 12 | 45,507,203  | Intergenic    | 0.57 | $1.75 \times 10^{-8}$ |
| rs35390084  | 12 | 71,078,528  | <i>PTPRR</i>  | 0.75 | $1.83 \times 10^{-9}$ |
| rs73183752  | 12 | 104,830,632 | Intergenic    | 0.68 | $1.99 \times 10^{-9}$ |
| rs10850126  | 12 | 113,492,978 | Intergenic    | 0.68 | $3.57 \times 10^{-9}$ |
| rs11066490  | 12 | 113,516,446 | <i>DTX1</i>   | 0.62 | $4.82 \times 10^{-8}$ |
| rs73233032  | 12 | 127,063,711 | Intergenic    | 0.64 | $1.58 \times 10^{-8}$ |
| rs78774634  | 13 | 26,268,359  | <i>ATP8A2</i> | 0.74 | $2.79 \times 10^{-9}$ |
| rs12876957  | 13 | 27,035,753  | Intergenic    | 0.68 | $2.93 \times 10^{-8}$ |
| rs140598505 | 13 | 35,318,120  | Intergenic    | 0.64 | $1.53 \times 10^{-8}$ |
| rs75638019  | 13 | 47,354,463  | <i>ESD</i>    | 0.69 | $2.45 \times 10^{-8}$ |
| rs61948301  | 13 | 47,369,199  | <i>ESD</i>    | 0.69 | $2.45 \times 10^{-8}$ |
| rs117772372 | 13 | 47,394,754  | Intergenic    | 0.68 | $4.59 \times 10^{-8}$ |
| rs61948307  | 13 | 47,405,736  | <i>HTR2A</i>  | 0.70 | $2.10 \times 10^{-8}$ |
| rs989959    | 13 | 75,422,522  | Intergenic    | 0.66 | $1.68 \times 10^{-8}$ |
| rs74559132  | 13 | 78,375,712  | Intergenic    | 0.67 | $4.08 \times 10^{-8}$ |
| rs75716101  | 13 | 78,378,790  | Intergenic    | 0.67 | $4.08 \times 10^{-8}$ |
| rs17778592  | 13 | 78,384,414  | Intergenic    | 0.67 | $4.08 \times 10^{-8}$ |
| rs9544634   | 13 | 78,495,934  | <i>EDNRB</i>  | 0.69 | $2.05 \times 10^{-8}$ |
| rs7358970   | 13 | 78,501,165  | <i>EDNRB</i>  | 0.69 | $2.05 \times 10^{-8}$ |
| rs77156815  | 13 | 78,505,585  | <i>EDNRB</i>  | 0.69 | $2.05 \times 10^{-8}$ |
| rs13378946  | 13 | 78,510,001  | <i>EDNRB</i>  | 0.69 | $2.05 \times 10^{-8}$ |
| rs147500560 | 13 | 78,511,320  | <i>EDNRB</i>  | 0.69 | $2.05 \times 10^{-8}$ |

|             |    |             |                   |      |                        |
|-------------|----|-------------|-------------------|------|------------------------|
| rs7491671   | 13 | 78,522,040  | <i>EDNRB</i>      | 0.69 | $2.05 \times 10^{-8}$  |
| rs9544646   | 13 | 78,531,839  | <i>EDNRB</i>      | 0.69 | $2.05 \times 10^{-8}$  |
| rs9530714   | 13 | 78,598,087  | <i>LINC00446</i>  | 0.69 | $2.05 \times 10^{-8}$  |
| rs9544682   | 13 | 78,638,833  | <i>RNF219-AS1</i> | 0.68 | $4.18 \times 10^{-8}$  |
| rs9600959   | 13 | 78,642,191  | <i>RNF219-AS1</i> | 0.68 | $4.18 \times 10^{-8}$  |
| rs9544685   | 13 | 78,647,303  | <i>RNF219-AS1</i> | 0.68 | $4.18 \times 10^{-8}$  |
| rs9544686   | 13 | 78,649,666  | <i>RNF219-AS1</i> | 0.68 | $4.18 \times 10^{-8}$  |
| rs9600960   | 13 | 78,653,341  | <i>RNF219-AS1</i> | 0.68 | $4.18 \times 10^{-8}$  |
| rs9593272   | 13 | 78,656,249  | <i>RNF219-AS1</i> | 0.68 | $4.18 \times 10^{-8}$  |
| rs9544693   | 13 | 78,662,484  | <i>RNF219-AS1</i> | 0.68 | $4.18 \times 10^{-8}$  |
| rs9593273   | 13 | 78,672,260  | <i>RNF219-AS1</i> | 0.68 | $4.18 \times 10^{-8}$  |
| rs17188711  | 13 | 93,563,911  | Intergenic        | 0.58 | $2.46 \times 10^{-8}$  |
| rs28498169  | 14 | 56,956,283  | Intergenic        | 0.61 | $3.92 \times 10^{-8}$  |
| rs8013503   | 14 | 56,957,478  | Intergenic        | 0.61 | $3.92 \times 10^{-8}$  |
| rs190683432 | 14 | 105,703,160 | <i>BRF1</i>       | 0.61 | $2.57 \times 10^{-8}$  |
| rs56267093  | 15 | 85,167,756  | Intergenic        | 0.65 | $2.06 \times 10^{-8}$  |
| rs75762958  | 15 | 85,177,464  | <i>SCAND2P</i>    | 0.65 | $2.06 \times 10^{-8}$  |
| rs72750865  | 15 | 85,180,800  | <i>SCAND2P</i>    | 0.65 | $2.06 \times 10^{-8}$  |
| rs66810580  | 15 | 85,198,350  | Intergenic        | 0.65 | $2.06 \times 10^{-8}$  |
| rs17598561  | 15 | 85,198,606  | <i>NMB</i>        | 0.65 | $2.06 \times 10^{-8}$  |
| rs1470807   | 15 | 87,328,117  | <i>AGBL1</i>      | 0.70 | $1.62 \times 10^{-9}$  |
| rs74517834  | 15 | 87,338,509  | <i>AGBL1</i>      | 0.69 | $2.02 \times 10^{-9}$  |
| rs11638907  | 15 | 92,590,756  | <i>SLCO3A1</i>    | 0.68 | $5.87 \times 10^{-9}$  |
| rs1060205   | 15 | 92,708,528  | <i>SLCO3A1</i>    | 0.64 | $3.37 \times 10^{-8}$  |
| rs56255214  | 16 | 1,026,166   | <i>LMF1</i>       | 0.75 | $2.94 \times 10^{-9}$  |
| rs3809673   | 16 | 1,029,912   | <i>LMF1</i>       | 0.73 | $5.87 \times 10^{-9}$  |
| rs72769452  | 16 | 1,035,591   | <i>SOX8</i>       | 0.71 | $4.49 \times 10^{-9}$  |
| rs74802497  | 16 | 6,030,025   | Intergenic        | 0.58 | $4.38 \times 10^{-8}$  |
| rs113285677 | 16 | 6,032,530   | Intergenic        | 0.60 | $3.10 \times 10^{-8}$  |
| rs116885412 | 16 | 8,606,507   | Intergenic        | 0.72 | $8.13 \times 10^{-10}$ |
| rs62020598  | 16 | 8,607,892   | Intergenic        | 0.69 | $1.95 \times 10^{-9}$  |
| rs114295607 | 16 | 10,764,486  | <i>TEKT5</i>      | 0.73 | $3.60 \times 10^{-11}$ |
| rs116456718 | 16 | 10,766,215  | <i>TEKT5</i>      | 0.73 | $3.60 \times 10^{-11}$ |
| rs17762887  | 16 | 10,768,084  | <i>TEKT5</i>      | 0.73 | $3.60 \times 10^{-11}$ |
| rs76655408  | 16 | 10,768,154  | <i>TEKT5</i>      | 0.65 | $6.57 \times 10^{-10}$ |
| rs79842190  | 16 | 10,768,185  | <i>TEKT5</i>      | 0.65 | $6.57 \times 10^{-10}$ |
| rs79225660  | 16 | 10,768,362  | <i>TEKT5</i>      | 0.73 | $3.60 \times 10^{-11}$ |
| rs117536175 | 16 | 10,770,878  | <i>TEKT5</i>      | 0.72 | $2.07 \times 10^{-10}$ |
| rs149367713 | 16 | 10,771,340  | <i>TEKT5</i>      | 0.66 | $1.56 \times 10^{-9}$  |
| rs16957526  | 16 | 10,774,378  | <i>TEKT5</i>      | 0.77 | $2.09 \times 10^{-11}$ |
| rs56071143  | 16 | 88,479,046  | Intergenic        | 0.75 | $2.06 \times 10^{-9}$  |
| rs80287397  | 16 | 88,480,148  | Intergenic        | 0.75 | $2.06 \times 10^{-9}$  |
| rs74556181  | 16 | 88,482,961  | Intergenic        | 0.73 | $3.88 \times 10^{-9}$  |
| rs76435067  | 16 | 88,483,007  | Intergenic        | 0.73 | $3.88 \times 10^{-9}$  |
| rs77767220  | 16 | 88,483,317  | Intergenic        | 0.73 | $3.88 \times 10^{-9}$  |
| rs77330683  | 16 | 88,485,006  | Intergenic        | 0.73 | $3.88 \times 10^{-9}$  |
| rs79291559  | 16 | 88,487,275  | Intergenic        | 0.73 | $3.45 \times 10^{-9}$  |
| rs55913039  | 16 | 88,489,283  | Intergenic        | 0.63 | $4.40 \times 10^{-8}$  |
| rs79081332  | 16 | 88,573,383  | <i>ZFPM1</i>      | 0.75 | $1.94 \times 10^{-9}$  |

|             |    |            |                  |      |                        |
|-------------|----|------------|------------------|------|------------------------|
| rs116292333 | 17 | 1,490,973  | <i>SLC43A2</i>   | 0.74 | $7.23 \times 10^{-10}$ |
| rs72820332  | 17 | 1,493,771  | <i>SLC43A2</i>   | 0.68 | $4.40 \times 10^{-9}$  |
| rs74702959  | 17 | 5,809,373  | <i>LOC339166</i> | 0.68 | $1.09 \times 10^{-8}$  |
| rs17714829  | 17 | 48,452,481 | <i>EMEI</i>      | 0.65 | $3.02 \times 10^{-9}$  |
| rs34927998  | 17 | 56,030,583 | <i>CUEDC1</i>    | 0.72 | $1.54 \times 10^{-9}$  |
| rs34778976  | 17 | 56,041,839 | Intergenic       | 0.72 | $1.93 \times 10^{-9}$  |
| rs12451676  | 17 | 56,044,061 | Intergenic       | 0.76 | $4.29 \times 10^{-10}$ |
| rs12953049  | 17 | 56,046,783 | Intergenic       | 0.63 | $1.34 \times 10^{-8}$  |
| rs12451572  | 17 | 56,046,844 | Intergenic       | 0.70 | $2.92 \times 10^{-9}$  |
| rs12942122  | 17 | 56,052,859 | <i>VEZFI</i>     | 0.72 | $1.60 \times 10^{-9}$  |
| rs12939279  | 17 | 56,056,706 | <i>VEZFI</i>     | 0.71 | $1.83 \times 10^{-9}$  |
| rs35999514  | 17 | 56,056,968 | <i>VEZFI</i>     | 0.70 | $2.92 \times 10^{-9}$  |
| rs12948279  | 17 | 56,057,181 | <i>VEZFI</i>     | 0.71 | $1.83 \times 10^{-9}$  |
| rs12453137  | 17 | 56,057,773 | <i>VEZFI</i>     | 0.71 | $1.83 \times 10^{-9}$  |
| rs12943664  | 17 | 56,059,883 | <i>VEZFI</i>     | 0.70 | $2.92 \times 10^{-9}$  |
| rs2228270   | 17 | 56,060,215 | <i>VEZFI</i>     | 0.70 | $3.29 \times 10^{-9}$  |
| rs35869410  | 17 | 56,060,793 | <i>VEZFI</i>     | 0.71 | $1.83 \times 10^{-9}$  |
| rs67275307  | 17 | 56,062,440 | <i>VEZFI</i>     | 0.70 | $2.92 \times 10^{-9}$  |
| rs35614268  | 17 | 56,066,132 | Intergenic       | 0.70 | $2.92 \times 10^{-9}$  |
| rs34649579  | 17 | 56,066,168 | Intergenic       | 0.70 | $2.92 \times 10^{-9}$  |
| rs35486142  | 17 | 56,071,681 | Intergenic       | 0.70 | $2.92 \times 10^{-9}$  |
| rs8071344   | 17 | 56,073,897 | Intergenic       | 0.70 | $3.29 \times 10^{-9}$  |
| rs8072156   | 17 | 56,074,128 | Intergenic       | 0.70 | $3.29 \times 10^{-9}$  |
| rs34976719  | 17 | 56,074,313 | Intergenic       | 0.64 | $2.13 \times 10^{-8}$  |
| rs12453846  | 17 | 56,075,369 | Intergenic       | 0.70 | $2.92 \times 10^{-9}$  |
| rs34474679  | 17 | 56,075,519 | Intergenic       | 0.70 | $2.92 \times 10^{-9}$  |
| rs34592492  | 17 | 56,079,037 | <i>SRSF1</i>     | 0.70 | $3.29 \times 10^{-9}$  |
| rs16942573  | 17 | 56,080,449 | <i>SRSF1</i>     | 0.72 | $2.12 \times 10^{-9}$  |
| rs34632420  | 17 | 56,089,235 | Intergenic       | 0.72 | $1.60 \times 10^{-9}$  |
| rs72839927  | 17 | 56,096,704 | Intergenic       | 0.72 | $1.60 \times 10^{-9}$  |
| rs12943228  | 17 | 56,098,978 | Intergenic       | 0.72 | $1.60 \times 10^{-9}$  |
| rs12944034  | 17 | 56,099,044 | Intergenic       | 0.72 | $1.60 \times 10^{-9}$  |
| rs35125995  | 17 | 56,110,445 | Intergenic       | 0.72 | $1.60 \times 10^{-9}$  |
| rs35614671  | 17 | 56,114,263 | Intergenic       | 0.71 | $1.83 \times 10^{-9}$  |
| rs66673146  | 17 | 56,126,589 | Intergenic       | 0.60 | $2.15 \times 10^{-8}$  |
| rs2585836   | 17 | 56,131,755 | Intergenic       | 0.60 | $2.13 \times 10^{-8}$  |
| rs12948186  | 17 | 56,175,361 | Intergenic       | 0.75 | $3.41 \times 10^{-10}$ |
| rs35552706  | 17 | 56,185,153 | Intergenic       | 0.73 | $1.17 \times 10^{-9}$  |
| rs36089182  | 17 | 56,227,116 | Intergenic       | 0.74 | $7.29 \times 10^{-10}$ |
| rs17836650  | 17 | 70,995,169 | <i>SLC39A11</i>  | 0.66 | $2.98 \times 10^{-8}$  |
| rs116636590 | 18 | 14,369,747 | Intergenic       | 0.66 | $1.23 \times 10^{-8}$  |
| rs146523855 | 18 | 75,133,589 | Intergenic       | 0.78 | $1.34 \times 10^{-10}$ |
| rs151193621 | 18 | 75,133,708 | Intergenic       | 0.74 | $4.20 \times 10^{-10}$ |
| rs73494356  | 18 | 75,135,405 | Intergenic       | 0.56 | $3.35 \times 10^{-8}$  |
| rs72993240  | 18 | 75,177,038 | Intergenic       | 0.73 | $2.84 \times 10^{-10}$ |
| rs2941814   | 18 | 76,568,753 | Intergenic       | 0.70 | $1.33 \times 10^{-9}$  |
| rs10418612  | 19 | 777,925    | Intergenic       | 0.73 | $5.71 \times 10^{-10}$ |
| rs10424126  | 19 | 777,986    | Intergenic       | 0.73 | $5.71 \times 10^{-10}$ |
| rs111413644 | 19 | 33,494,696 | <i>RHPN2</i>     | 0.75 | $2.57 \times 10^{-10}$ |

|             |            |            |                  |            |                        |                       |
|-------------|------------|------------|------------------|------------|------------------------|-----------------------|
| rs59559602  | 19         | 47,001,057 | <i>PPP5D1</i>    | 0.58       | $6.77 \times 10^{-9}$  |                       |
| rs74838769  | 19         | 47,008,425 | <i>PPP5D1</i>    | 0.55       | $1.97 \times 10^{-8}$  |                       |
| rs185099468 | 19         | 47,009,279 | <i>PPP5D1</i>    | 0.72       | $8.91 \times 10^{-11}$ |                       |
| rs2124908   | 19         | 52,037,559 | Intergenic       | 0.75       | $9.05 \times 10^{-10}$ |                       |
| rs1457093   | 19         | 52,047,847 | Intergenic       | 0.70       | $2.92 \times 10^{-9}$  |                       |
| rs3752133   | 19         | 52,049,899 | Intergenic       | 0.70       | $2.92 \times 10^{-9}$  |                       |
| rs1840826   | 19         | 52,051,381 | Intergenic       | 0.65       | $1.13 \times 10^{-8}$  |                       |
| rs74539314  | 19         | 52,081,522 | <i>ZNF175</i>    | 0.70       | $2.65 \times 10^{-9}$  |                       |
| rs77628825  | 19         | 52,081,523 | <i>ZNF175</i>    | 0.68       | $4.88 \times 10^{-9}$  |                       |
| rs34845045  | 19         | 55,430,877 | Intergenic       | 0.66       | $7.96 \times 10^{-9}$  |                       |
| rs11880295  | 19         | 55,432,529 | Intergenic       | 0.70       | $2.86 \times 10^{-9}$  |                       |
| rs4806624   | 19         | 55,436,805 | <i>NLRP7</i>     | 0.70       | $2.86 \times 10^{-9}$  |                       |
| rs4806625   | 19         | 55,436,977 | <i>NLRP7</i>     | 0.70       | $2.86 \times 10^{-9}$  |                       |
| rs34582807  | 19         | 55,437,996 | <i>NLRP7</i>     | 0.68       | $5.25 \times 10^{-9}$  |                       |
| rs12979871  | 19         | 55,439,321 | <i>NLRP7</i>     | 0.70       | $2.86 \times 10^{-9}$  |                       |
| rs11879978  | 19         | 55,444,231 | <i>NLRP7</i>     | 0.76       | $5.58 \times 10^{-10}$ |                       |
| rs13041373  | 20         | 8,115,957  | <i>PLCB1</i>     | 0.55       | $2.97 \times 10^{-8}$  |                       |
| rs148424791 | 20         | 19,004,606 | Intergenic       | 0.70       | $2.80 \times 10^{-10}$ |                       |
| rs149259960 | 20         | 22,508,182 | Intergenic       | 0.67       | $7.36 \times 10^{-9}$  |                       |
| rs73300991  | 20         | 22,551,326 | <i>LINC00261</i> | 0.63       | $3.97 \times 10^{-8}$  |                       |
| rs73145706  | 20         | 61,633,711 | Intergenic       | 0.56       | $3.89 \times 10^{-8}$  |                       |
| rs74629807  | 21         | 32,437,494 | Intergenic       | 0.58       | $2.88 \times 10^{-8}$  |                       |
| rs5992995   | 22         | 18,565,727 | <i>PEX26</i>     | 0.62       | $1.38 \times 10^{-8}$  |                       |
| rs5992169   | 22         | 18,572,431 | <i>PEX26</i>     | 0.63       | $1.02 \times 10^{-8}$  |                       |
| rs1043278   | 22         | 18,573,967 | Intergenic       | 0.61       | $2.25 \times 10^{-8}$  |                       |
| rs12160860  | 22         | 18,575,941 | Intergenic       | 0.61       | $2.25 \times 10^{-8}$  |                       |
| rs5992997   | 22         | 18,576,389 | Intergenic       | 0.61       | $2.25 \times 10^{-8}$  |                       |
| rs12157397  | 22         | 18,578,703 | Intergenic       | 0.63       | $1.02 \times 10^{-8}$  |                       |
| rs113679997 | 22         | 18,580,190 | Intergenic       | 0.65       | $5.95 \times 10^{-9}$  |                       |
| rs12160466  | 22         | 18,580,460 | Intergenic       | 0.62       | $1.38 \times 10^{-8}$  |                       |
| rs5992174   | 22         | 18,580,972 | Intergenic       | 0.63       | $9.66 \times 10^{-9}$  |                       |
| rs28839     | 22         | 18,582,402 | Intergenic       | 0.65       | $5.95 \times 10^{-9}$  |                       |
| rs467998    | 22         | 18,582,650 | Intergenic       | 0.65       | $5.95 \times 10^{-9}$  |                       |
| rs467937    | 22         | 18,583,720 | Intergenic       | 0.62       | $1.62 \times 10^{-8}$  |                       |
| rs467924    | 22         | 18,583,894 | Intergenic       | 0.66       | $4.77 \times 10^{-9}$  |                       |
| rs468219    | 22         | 18,585,577 | Intergenic       | 0.65       | $6.87 \times 10^{-9}$  |                       |
| rs468235    | 22         | 18,585,987 | Intergenic       | 0.66       | $4.77 \times 10^{-9}$  |                       |
| rs468789    | 22         | 18,586,169 | Intergenic       | 0.66       | $4.77 \times 10^{-9}$  |                       |
| rs5992176   | 22         | 18,589,643 | Intergenic       | 0.66       | $4.77 \times 10^{-9}$  |                       |
| rs462187    | 22         | 18,591,546 | Intergenic       | 0.66       | $4.77 \times 10^{-9}$  |                       |
| rs404145    | 22         | 18,591,678 | Intergenic       | 0.66       | $4.77 \times 10^{-9}$  |                       |
| rs425889    | 22         | 18,591,891 | Intergenic       | 0.66       | $4.77 \times 10^{-9}$  |                       |
| rs536730    | 22         | 27,719,151 | Intergenic       | 0.73       | $1.16 \times 10^{-9}$  |                       |
| rs531862    | 22         | 27,719,198 | Intergenic       | 0.73       | $1.16 \times 10^{-9}$  |                       |
| rs6005434   | 22         | 27,833,053 | Intergenic       | 0.53       | $1.17 \times 10^{-8}$  |                       |
| rs5997248   | 22         | 27,833,402 | Intergenic       | 0.53       | $1.17 \times 10^{-8}$  |                       |
| rs6005435   | 22         | 27,833,459 | Intergenic       | 0.53       | $1.17 \times 10^{-8}$  |                       |
| rs55844758  | 22         | 31,034,084 | <i>SLC35E4</i>   | 0.68       | $2.64 \times 10^{-8}$  |                       |
| <i>GHR</i>  | rs34143150 | 1          | 22,514,071       | Intergenic | 1.79                   | $1.39 \times 10^{-8}$ |

|             |   |             |               |      |                       |
|-------------|---|-------------|---------------|------|-----------------------|
| rs17356177  | 1 | 22,549,764  | Intergenic    | 1.74 | $2.69 \times 10^{-8}$ |
| rs7532303   | 1 | 44,864,049  | Intergenic    | 1.65 | $3.50 \times 10^{-8}$ |
| rs12405914  | 1 | 44,871,575  | <i>RNF220</i> | 1.65 | $3.50 \times 10^{-8}$ |
| rs77106564  | 1 | 44,872,010  | <i>RNF220</i> | 1.65 | $3.50 \times 10^{-8}$ |
| rs77924537  | 1 | 44,872,215  | <i>RNF220</i> | 1.65 | $3.50 \times 10^{-8}$ |
| rs12026556  | 1 | 70,282,490  | <i>LRRC7</i>  | 1.61 | $2.09 \times 10^{-8}$ |
| rs11209550  | 1 | 70,286,394  | <i>LRRC7</i>  | 1.61 | $2.09 \times 10^{-8}$ |
| rs148813684 | 1 | 70,287,359  | <i>LRRC7</i>  | 1.62 | $2.54 \times 10^{-8}$ |
| rs77207864  | 1 | 70,293,796  | <i>LRRC7</i>  | 1.77 | $2.92 \times 10^{-9}$ |
| rs1938581   | 1 | 70,294,568  | <i>LRRC7</i>  | 1.77 | $2.92 \times 10^{-9}$ |
| rs2175743   | 1 | 70,295,901  | <i>LRRC7</i>  | 1.77 | $2.92 \times 10^{-9}$ |
| rs78898899  | 1 | 70,297,315  | <i>LRRC7</i>  | 1.77 | $2.92 \times 10^{-9}$ |
| rs78975854  | 1 | 70,304,664  | <i>LRRC7</i>  | 1.77 | $2.92 \times 10^{-9}$ |
| rs12024702  | 1 | 70,305,436  | <i>LRRC7</i>  | 1.77 | $2.92 \times 10^{-9}$ |
| rs79416278  | 1 | 70,309,138  | <i>LRRC7</i>  | 1.77 | $2.92 \times 10^{-9}$ |
| rs6658642   | 1 | 70,311,793  | <i>LRRC7</i>  | 1.77 | $2.92 \times 10^{-9}$ |
| rs76484547  | 1 | 70,316,902  | <i>LRRC7</i>  | 1.77 | $2.92 \times 10^{-9}$ |
| rs1317127   | 1 | 70,320,076  | <i>LRRC7</i>  | 1.73 | $5.25 \times 10^{-9}$ |
| rs149196274 | 1 | 70,321,381  | <i>LRRC7</i>  | 1.73 | $5.25 \times 10^{-9}$ |
| rs12048784  | 1 | 70,321,965  | <i>LRRC7</i>  | 1.73 | $5.25 \times 10^{-9}$ |
| rs12035080  | 1 | 70,326,207  | <i>LRRC7</i>  | 1.73 | $5.25 \times 10^{-9}$ |
| rs17131060  | 1 | 70,329,599  | <i>LRRC7</i>  | 1.73 | $5.25 \times 10^{-9}$ |
| rs17131061  | 1 | 70,330,376  | <i>LRRC7</i>  | 1.73 | $5.25 \times 10^{-9}$ |
| rs75258903  | 1 | 70,332,350  | <i>LRRC7</i>  | 1.73 | $5.25 \times 10^{-9}$ |
| rs11209566  | 1 | 70,333,440  | <i>LRRC7</i>  | 1.73 | $5.25 \times 10^{-9}$ |
| rs17131066  | 1 | 70,337,409  | <i>LRRC7</i>  | 1.73 | $5.25 \times 10^{-9}$ |
| rs17425958  | 1 | 102,107,148 | Intergenic    | 1.60 | $3.68 \times 10^{-8}$ |
| rs61804497  | 1 | 102,113,725 | Intergenic    | 1.58 | $4.87 \times 10^{-8}$ |
| rs79442714  | 1 | 113,833,382 | Intergenic    | 1.73 | $4.05 \times 10^{-8}$ |
| rs12756965  | 1 | 113,839,149 | Intergenic    | 1.73 | $4.05 \times 10^{-8}$ |
| rs12045733  | 1 | 113,848,704 | Intergenic    | 1.73 | $4.05 \times 10^{-8}$ |
| rs12038527  | 1 | 113,848,729 | Intergenic    | 1.73 | $4.05 \times 10^{-8}$ |
| rs4839306   | 1 | 113,849,470 | Intergenic    | 1.73 | $4.05 \times 10^{-8}$ |
| rs12048530  | 1 | 113,851,139 | Intergenic    | 1.73 | $4.05 \times 10^{-8}$ |
| rs12046318  | 1 | 113,854,250 | Intergenic    | 1.73 | $4.05 \times 10^{-8}$ |
| rs35059446  | 1 | 113,858,904 | Intergenic    | 1.73 | $4.05 \times 10^{-8}$ |
| rs2226155   | 1 | 113,865,778 | Intergenic    | 1.65 | $1.03 \times 10^{-8}$ |
| rs1361765   | 1 | 113,866,202 | Intergenic    | 1.65 | $1.03 \times 10^{-8}$ |
| rs12024820  | 1 | 113,866,431 | Intergenic    | 1.65 | $1.03 \times 10^{-8}$ |
| rs6674942   | 1 | 113,866,749 | Intergenic    | 1.65 | $1.03 \times 10^{-8}$ |
| rs12025961  | 1 | 113,867,828 | Intergenic    | 1.65 | $1.03 \times 10^{-8}$ |
| rs12047722  | 1 | 113,868,398 | Intergenic    | 1.65 | $1.03 \times 10^{-8}$ |
| rs4838983   | 1 | 113,870,537 | Intergenic    | 1.65 | $1.03 \times 10^{-8}$ |
| rs4839309   | 1 | 113,871,003 | Intergenic    | 1.65 | $1.03 \times 10^{-8}$ |
| rs142534849 | 1 | 181,041,664 | Intergenic    | 1.72 | $3.24 \times 10^{-8}$ |
| rs6673310   | 1 | 192,597,985 | Intergenic    | 1.78 | $2.63 \times 10^{-8}$ |
| rs55992816  | 2 | 2,509,177   | Intergenic    | 1.79 | $2.15 \times 10^{-8}$ |
| rs60327756  | 2 | 16,408,983  | Intergenic    | 1.85 | $5.46 \times 10^{-9}$ |
| rs58629855  | 2 | 16,408,984  | Intergenic    | 1.85 | $5.46 \times 10^{-9}$ |



|             |   |             |               |      |                       |
|-------------|---|-------------|---------------|------|-----------------------|
| rs4832659   | 2 | 16,419,751  | Intergenic    | 1.74 | $3.72 \times 10^{-8}$ |
| rs62152138  | 2 | 103,324,335 | <i>SLC9A2</i> | 1.79 | $3.32 \times 10^{-8}$ |
| rs62175148  | 2 | 174,367,561 | Intergenic    | 1.42 | $4.18 \times 10^{-9}$ |
| rs17753758  | 2 | 174,381,005 | Intergenic    | 1.36 | $8.93 \times 10^{-9}$ |
| rs17364234  | 2 | 214,155,327 | <i>SPAG16</i> | 1.62 | $2.42 \times 10^{-8}$ |
| rs77999946  | 2 | 214,263,687 | <i>SPAG16</i> | 1.63 | $1.96 \times 10^{-8}$ |
| rs17701917  | 2 | 214,439,806 | <i>SPAG16</i> | 1.52 | $4.88 \times 10^{-8}$ |
| rs189859464 | 3 | 1,749,654   | Intergenic    | 1.60 | $3.33 \times 10^{-9}$ |
| rs1534246   | 3 | 73,947,467  | Intergenic    | 1.49 | $2.85 \times 10^{-8}$ |
| rs72912050  | 3 | 89,776,155  | Intergenic    | 1.69 | $4.77 \times 10^{-8}$ |
| rs12631105  | 3 | 89,776,624  | Intergenic    | 1.69 | $4.77 \times 10^{-8}$ |
| rs6781208   | 3 | 89,778,038  | Intergenic    | 1.69 | $4.77 \times 10^{-8}$ |
| rs6781309   | 3 | 89,778,128  | Intergenic    | 1.69 | $4.77 \times 10^{-8}$ |
| rs79778210  | 3 | 89,779,169  | Intergenic    | 1.69 | $4.77 \times 10^{-8}$ |
| rs57036056  | 3 | 89,783,903  | Intergenic    | 1.69 | $4.77 \times 10^{-8}$ |
| rs72912072  | 3 | 89,784,905  | Intergenic    | 1.69 | $4.77 \times 10^{-8}$ |
| rs10511146  | 3 | 89,790,208  | Intergenic    | 1.69 | $4.77 \times 10^{-8}$ |
| rs17027205  | 3 | 89,790,574  | Intergenic    | 1.69 | $4.77 \times 10^{-8}$ |
| rs6551423   | 3 | 89,792,790  | Intergenic    | 1.69 | $4.77 \times 10^{-8}$ |
| rs6773084   | 3 | 89,795,298  | Intergenic    | 1.78 | $2.24 \times 10^{-8}$ |
| rs7430934   | 3 | 89,800,760  | Intergenic    | 1.78 | $2.24 \times 10^{-8}$ |
| rs144610471 | 3 | 89,801,865  | Intergenic    | 1.78 | $2.33 \times 10^{-8}$ |
| rs76069798  | 3 | 89,818,218  | Intergenic    | 1.78 | $2.24 \times 10^{-8}$ |
| rs77479756  | 3 | 89,818,982  | Intergenic    | 1.78 | $2.24 \times 10^{-8}$ |
| rs12636191  | 3 | 89,823,336  | Intergenic    | 1.78 | $2.24 \times 10^{-8}$ |
| rs111303123 | 3 | 89,826,743  | Intergenic    | 1.78 | $2.24 \times 10^{-8}$ |
| rs6771600   | 3 | 89,828,209  | Intergenic    | 1.78 | $2.24 \times 10^{-8}$ |
| rs74986556  | 3 | 89,830,249  | Intergenic    | 1.78 | $2.24 \times 10^{-8}$ |
| rs76256245  | 3 | 89,830,289  | Intergenic    | 1.78 | $2.24 \times 10^{-8}$ |
| rs1915728   | 3 | 89,832,810  | Intergenic    | 1.78 | $2.24 \times 10^{-8}$ |
| rs1851051   | 3 | 89,840,346  | Intergenic    | 1.78 | $2.24 \times 10^{-8}$ |
| rs17027228  | 3 | 89,841,166  | Intergenic    | 1.78 | $2.24 \times 10^{-8}$ |
| rs74541906  | 3 | 89,854,686  | Intergenic    | 1.78 | $2.24 \times 10^{-8}$ |
| rs79617218  | 3 | 89,858,299  | Intergenic    | 1.78 | $2.24 \times 10^{-8}$ |
| rs6806871   | 3 | 89,861,343  | Intergenic    | 1.78 | $2.24 \times 10^{-8}$ |
| rs74718075  | 3 | 89,862,089  | Intergenic    | 1.78 | $2.24 \times 10^{-8}$ |
| rs79036643  | 3 | 89,862,391  | Intergenic    | 1.78 | $2.24 \times 10^{-8}$ |
| rs150763639 | 3 | 89,864,338  | Intergenic    | 1.78 | $2.24 \times 10^{-8}$ |
| rs80172038  | 3 | 89,865,683  | Intergenic    | 1.78 | $2.24 \times 10^{-8}$ |
| rs2177058   | 3 | 89,880,144  | Intergenic    | 1.78 | $2.24 \times 10^{-8}$ |
| rs6551435   | 3 | 89,882,196  | Intergenic    | 1.78 | $2.24 \times 10^{-8}$ |
| rs149571900 | 3 | 89,883,366  | Intergenic    | 1.78 | $2.24 \times 10^{-8}$ |
| rs79174609  | 3 | 89,884,518  | Intergenic    | 1.78 | $2.24 \times 10^{-8}$ |
| rs9683159   | 3 | 89,907,687  | Intergenic    | 1.78 | $2.24 \times 10^{-8}$ |
| rs113766991 | 3 | 89,914,798  | Intergenic    | 1.78 | $2.24 \times 10^{-8}$ |
| rs7637958   | 3 | 89,925,048  | Intergenic    | 1.78 | $2.24 \times 10^{-8}$ |
| rs76381775  | 3 | 89,960,211  | Intergenic    | 1.78 | $2.24 \times 10^{-8}$ |
| rs1949650   | 3 | 89,963,168  | Intergenic    | 1.78 | $2.24 \times 10^{-8}$ |
| rs74494604  | 3 | 89,967,879  | Intergenic    | 1.78 | $2.24 \times 10^{-8}$ |

|             |   |             |                     |      |                        |
|-------------|---|-------------|---------------------|------|------------------------|
| rs79318377  | 3 | 144,035,182 | Intergenic          | 1.75 | $2.32 \times 10^{-8}$  |
| rs76121376  | 3 | 171,716,427 | Intergenic          | 1.51 | $1.78 \times 10^{-8}$  |
| rs2720910   | 3 | 194,734,651 | Intergenic          | 1.57 | $3.14 \times 10^{-8}$  |
| rs116486576 | 4 | 7,350,579   | <i>SORCS2</i>       | 2.15 | $3.26 \times 10^{-12}$ |
| rs12513387  | 4 | 24,243,680  | Intergenic          | 1.72 | $4.23 \times 10^{-8}$  |
| rs186976037 | 4 | 31,817,981  | Intergenic          | 1.68 | $1.05 \times 10^{-9}$  |
| rs13129886  | 4 | 130,922,726 | Intergenic          | 1.92 | $7.38 \times 10^{-10}$ |
| rs13113563  | 4 | 130,929,195 | Intergenic          | 1.92 | $7.38 \times 10^{-10}$ |
| rs13147782  | 4 | 131,034,260 | Intergenic          | 1.90 | $9.04 \times 10^{-9}$  |
| rs10000443  | 4 | 131,064,600 | Intergenic          | 1.74 | $1.15 \times 10^{-8}$  |
| rs10011007  | 4 | 131,064,690 | Intergenic          | 1.81 | $4.51 \times 10^{-9}$  |
| rs28592799  | 4 | 131,065,258 | Intergenic          | 1.81 | $4.51 \times 10^{-9}$  |
| rs10008557  | 4 | 131,072,168 | Intergenic          | 1.81 | $4.51 \times 10^{-9}$  |
| rs11947093  | 4 | 131,087,342 | Intergenic          | 1.85 | $2.89 \times 10^{-9}$  |
| rs28376800  | 4 | 131,095,591 | Intergenic          | 1.85 | $2.89 \times 10^{-9}$  |
| rs72714251  | 4 | 141,075,184 | <i>MAML3</i>        | 2.09 | $9.59 \times 10^{-13}$ |
| rs72719967  | 4 | 153,222,778 | Intergenic          | 1.80 | $3.46 \times 10^{-8}$  |
| rs7678272   | 4 | 153,229,868 | Intergenic          | 1.77 | $4.18 \times 10^{-8}$  |
| rs115973927 | 4 | 181,655,290 | Intergenic          | 1.79 | $4.36 \times 10^{-8}$  |
| rs13144644  | 4 | 186,663,922 | <i>SORBS2</i>       | 1.84 | $1.82 \times 10^{-9}$  |
| rs35991414  | 4 | 186,697,952 | <i>SORBS2</i>       | 1.74 | $3.46 \times 10^{-9}$  |
| rs185793609 | 5 | 30,359,017  | Intergenic          | 1.63 | $3.50 \times 10^{-8}$  |
| rs73246227  | 5 | 117,457,849 | <i>LOC102467224</i> | 1.85 | $1.03 \times 10^{-8}$  |
| rs78962704  | 5 | 117,463,322 | <i>LOC102467224</i> | 1.77 | $2.30 \times 10^{-8}$  |
| rs111720900 | 5 | 117,484,254 | <i>LOC102467224</i> | 1.77 | $2.30 \times 10^{-8}$  |
| rs59291909  | 5 | 117,486,947 | <i>LOC102467224</i> | 1.77 | $2.30 \times 10^{-8}$  |
| rs58706630  | 5 | 117,488,641 | <i>LOC102467224</i> | 1.77 | $2.30 \times 10^{-8}$  |
| rs1382724   | 5 | 117,492,656 | <i>LOC102467224</i> | 1.77 | $2.30 \times 10^{-8}$  |
| rs1382723   | 5 | 117,492,859 | <i>LOC102467224</i> | 1.77 | $2.30 \times 10^{-8}$  |
| rs6894503   | 5 | 117,492,998 | <i>LOC102467224</i> | 1.77 | $2.30 \times 10^{-8}$  |
| rs73246132  | 5 | 117,494,765 | <i>LOC102467224</i> | 1.77 | $2.30 \times 10^{-8}$  |
| rs151145004 | 5 | 117,510,361 | <i>LOC102467224</i> | 1.76 | $2.44 \times 10^{-8}$  |
| rs73246174  | 5 | 117,510,430 | <i>LOC102467224</i> | 1.76 | $2.44 \times 10^{-8}$  |
| rs73246178  | 5 | 117,510,611 | <i>LOC102467224</i> | 1.76 | $2.44 \times 10^{-8}$  |
| rs73246751  | 5 | 117,518,968 | <i>LOC102467224</i> | 1.76 | $2.44 \times 10^{-8}$  |
| rs74569203  | 5 | 117,521,908 | <i>LOC102467224</i> | 1.71 | $3.36 \times 10^{-8}$  |
| rs17143707  | 5 | 117,522,041 | <i>LOC102467224</i> | 1.74 | $2.56 \times 10^{-8}$  |
| rs115412659 | 5 | 148,150,080 | Intergenic          | 1.70 | $4.98 \times 10^{-8}$  |
| rs111934886 | 6 | 14,339,896  | Intergenic          | 2.13 | $7.51 \times 10^{-11}$ |
| rs45613533  | 6 | 37,359,222  | <i>RNF8</i>         | 1.70 | $1.20 \times 10^{-8}$  |
| rs73024503  | 6 | 162,326,020 | <i>PARK2</i>        | 1.55 | $1.37 \times 10^{-8}$  |
| rs76821212  | 6 | 165,921,617 | <i>PDE10A</i>       | 2.03 | $2.31 \times 10^{-10}$ |
| rs76570644  | 7 | 1,178,838   | Intergenic          | 1.90 | $1.46 \times 10^{-10}$ |
| rs189549017 | 7 | 10,620,006  | Intergenic          | 1.83 | $1.08 \times 10^{-8}$  |
| rs62446904  | 7 | 30,754,538  | Intergenic          | 1.85 | $1.32 \times 10^{-9}$  |
| rs74657816  | 7 | 46,670,682  | Intergenic          | 1.76 | $9.00 \times 10^{-9}$  |
| rs35473791  | 7 | 78,380,708  | <i>MAGI2</i>        | 1.50 | $2.52 \times 10^{-8}$  |
| rs12705407  | 7 | 106,817,433 | <i>HBPI</i>         | 2.14 | $5.60 \times 10^{-12}$ |
| rs12705408  | 7 | 106,871,952 | <i>COG5</i>         | 2.09 | $1.00 \times 10^{-11}$ |

|             |    |             |                       |      |                        |
|-------------|----|-------------|-----------------------|------|------------------------|
| rs11762802  | 7  | 106,961,882 | <i>COG5</i>           | 2.30 | $6.62 \times 10^{-13}$ |
| rs73207299  | 8  | 11,691,145  | <i>FDFT1</i>          | 1.54 | $2.79 \times 10^{-8}$  |
| rs73209015  | 8  | 11,700,967  | <i>CTSB</i>           | 1.54 | $2.79 \times 10^{-8}$  |
| rs7838546   | 8  | 31,947,880  | <i>NRG1; NRG1-IT1</i> | 1.50 | $3.64 \times 10^{-8}$  |
| rs112981873 | 8  | 74,798,939  | Intergenic            | 1.58 | $4.12 \times 10^{-8}$  |
| rs62518566  | 8  | 124,654,036 | Intergenic            | 1.52 | $2.06 \times 10^{-8}$  |
| rs182222543 | 9  | 66,272,947  | Intergenic            | 1.48 | $3.43 \times 10^{-9}$  |
| rs4747848   | 10 | 10,161,275  | Intergenic            | 2.04 | $1.32 \times 10^{-11}$ |
| rs140459811 | 10 | 24,183,910  | <i>KIAA1217</i>       | 1.59 | $4.56 \times 10^{-8}$  |
| rs7917505   | 10 | 70,974,481  | Intergenic            | 1.91 | $3.33 \times 10^{-9}$  |
| rs10823525  | 10 | 72,114,565  | <i>LRRC20</i>         | 1.58 | $2.17 \times 10^{-8}$  |
| rs78745769  | 10 | 72,115,208  | <i>LRRC20</i>         | 1.45 | $2.33 \times 10^{-8}$  |
| rs10823526  | 10 | 72,115,475  | <i>LRRC20</i>         | 1.48 | $1.78 \times 10^{-8}$  |
| rs10823528  | 10 | 72,115,839  | <i>LRRC20</i>         | 1.48 | $1.78 \times 10^{-8}$  |
| rs115151048 | 10 | 72,121,454  | <i>LRRC20</i>         | 1.48 | $1.78 \times 10^{-8}$  |
| rs76702380  | 10 | 72,129,054  | <i>LRRC20</i>         | 1.48 | $1.78 \times 10^{-8}$  |
| rs2127584   | 10 | 72,132,013  | <i>LRRC20</i>         | 1.48 | $1.78 \times 10^{-8}$  |
| rs45450199  | 10 | 72,182,110  | <i>EIF4EBP2</i>       | 1.41 | $4.27 \times 10^{-8}$  |
| rs11592130  | 10 | 89,520,241  | <i>ATAD1</i>          | 1.81 | $1.94 \times 10^{-9}$  |
| rs11185946  | 10 | 91,744,898  | Intergenic            | 1.33 | $2.29 \times 10^{-8}$  |
| rs72819163  | 10 | 108,082,813 | Intergenic            | 2.14 | $9.09 \times 10^{-11}$ |
| rs79988456  | 10 | 108,446,150 | <i>SORCSI</i>         | 1.72 | $3.60 \times 10^{-8}$  |
| rs117723370 | 10 | 108,556,637 | <i>SORCSI</i>         | 1.76 | $2.08 \times 10^{-8}$  |
| rs17181929  | 10 | 108,559,676 | <i>SORCSI</i>         | 1.82 | $1.15 \times 10^{-8}$  |
| rs142910305 | 11 | 89,332,684  | Intergenic            | 1.65 | $1.35 \times 10^{-8}$  |
| rs2000916   | 11 | 106,403,449 | Intergenic            | 1.59 | $6.96 \times 10^{-9}$  |
| rs2000917   | 11 | 106,403,663 | Intergenic            | 2.11 | $3.05 \times 10^{-11}$ |
| rs1945075   | 11 | 106,406,584 | Intergenic            | 1.47 | $2.99 \times 10^{-8}$  |
| rs35891003  | 11 | 106,407,376 | Intergenic            | 2.18 | $2.40 \times 10^{-11}$ |
| rs35591067  | 11 | 106,407,476 | Intergenic            | 2.18 | $2.40 \times 10^{-11}$ |
| rs71488218  | 11 | 106,408,734 | Intergenic            | 2.18 | $2.40 \times 10^{-11}$ |
| rs111536413 | 11 | 106,408,764 | Intergenic            | 1.57 | $1.25 \times 10^{-8}$  |
| rs67340024  | 11 | 106,409,125 | Intergenic            | 1.47 | $2.99 \times 10^{-8}$  |
| rs35059716  | 11 | 106,409,535 | Intergenic            | 1.47 | $2.99 \times 10^{-8}$  |
| rs1945066   | 11 | 106,410,615 | Intergenic            | 2.18 | $2.40 \times 10^{-11}$ |
| rs60781140  | 11 | 106,410,810 | Intergenic            | 1.47 | $2.99 \times 10^{-8}$  |
| rs1945065   | 11 | 106,411,576 | Intergenic            | 1.47 | $2.99 \times 10^{-8}$  |
| rs1945064   | 11 | 106,411,935 | Intergenic            | 1.47 | $2.99 \times 10^{-8}$  |
| rs111372550 | 11 | 106,412,481 | Intergenic            | 1.47 | $2.99 \times 10^{-8}$  |
| rs151104176 | 11 | 106,413,006 | Intergenic            | 1.47 | $2.99 \times 10^{-8}$  |
| rs112829654 | 11 | 106,413,193 | Intergenic            | 2.14 | $3.45 \times 10^{-11}$ |
| rs17105823  | 11 | 106,413,556 | Intergenic            | 1.47 | $2.99 \times 10^{-8}$  |
| rs1945063   | 11 | 106,414,112 | Intergenic            | 1.47 | $2.99 \times 10^{-8}$  |
| rs1945062   | 11 | 106,414,284 | Intergenic            | 1.47 | $2.99 \times 10^{-8}$  |
| rs71488219  | 11 | 106,414,727 | Intergenic            | 2.18 | $2.40 \times 10^{-11}$ |
| rs66746934  | 11 | 106,415,469 | Intergenic            | 1.47 | $2.99 \times 10^{-8}$  |
| rs35064702  | 11 | 106,416,694 | Intergenic            | 2.18 | $2.40 \times 10^{-11}$ |
| rs34917464  | 11 | 106,417,187 | Intergenic            | 1.47 | $2.99 \times 10^{-8}$  |
| rs35182337  | 11 | 106,418,566 | Intergenic            | 2.18 | $2.40 \times 10^{-11}$ |

|             |    |             |                |      |                        |
|-------------|----|-------------|----------------|------|------------------------|
| rs35990922  | 11 | 106,418,626 | Intergenic     | 1.47 | $2.99 \times 10^{-8}$  |
| rs12795470  | 11 | 106,418,877 | Intergenic     | 1.47 | $2.99 \times 10^{-8}$  |
| rs12795694  | 11 | 106,418,978 | Intergenic     | 1.47 | $2.99 \times 10^{-8}$  |
| rs7949190   | 11 | 124,596,741 | Intergenic     | 1.61 | $2.53 \times 10^{-8}$  |
| rs7949826   | 11 | 124,597,044 | Intergenic     | 1.59 | $3.37 \times 10^{-8}$  |
| rs73575692  | 11 | 128,723,557 | <i>KCNJI</i>   | 1.75 | $3.83 \times 10^{-8}$  |
| rs113085163 | 11 | 128,723,879 | <i>KCNJI</i>   | 1.75 | $3.83 \times 10^{-8}$  |
| rs72472267  | 11 | 133,455,513 | Intergenic     | 1.69 | $3.54 \times 10^{-9}$  |
| rs75193006  | 12 | 32,361,562  | <i>BICD1</i>   | 1.73 | $1.92 \times 10^{-8}$  |
| rs10745477  | 12 | 88,741,050  | Intergenic     | 1.55 | $3.37 \times 10^{-8}$  |
| rs10745478  | 12 | 88,746,811  | Intergenic     | 1.64 | $9.37 \times 10^{-9}$  |
| rs141073155 | 12 | 94,740,098  | <i>CEP83</i>   | 1.67 | $1.19 \times 10^{-8}$  |
| rs142713725 | 13 | 88,877,310  | Intergenic     | 1.72 | $1.53 \times 10^{-8}$  |
| rs1959395   | 14 | 83,928,612  | Intergenic     | 1.69 | $3.71 \times 10^{-8}$  |
| rs75782643  | 14 | 90,785,989  | <i>NRDE2</i>   | 1.79 | $4.17 \times 10^{-8}$  |
| rs79684894  | 14 | 90,791,704  | <i>NRDE2</i>   | 1.79 | $4.17 \times 10^{-8}$  |
| rs143398009 | 14 | 98,470,614  | Intergenic     | 1.49 | $4.99 \times 10^{-8}$  |
| rs141134139 | 14 | 106,800,176 | Intergenic     | 1.56 | $9.18 \times 10^{-9}$  |
| rs35279276  | 15 | 56,383,205  | <i>RFX7</i>    | 1.69 | $1.31 \times 10^{-8}$  |
| rs34161200  | 15 | 56,784,198  | Intergenic     | 1.72 | $8.78 \times 10^{-9}$  |
| rs12899275  | 15 | 85,521,127  | Intergenic     | 1.64 | $3.56 \times 10^{-8}$  |
| rs17657561  | 15 | 88,003,592  | Intergenic     | 1.78 | $4.93 \times 10^{-8}$  |
| rs80080592  | 15 | 92,792,642  | Intergenic     | 1.56 | $1.29 \times 10^{-8}$  |
| rs12050999  | 16 | 5,245,550   | Intergenic     | 1.82 | $1.06 \times 10^{-8}$  |
| rs10852650  | 16 | 5,251,168   | Intergenic     | 1.69 | $3.62 \times 10^{-8}$  |
| rs10852651  | 16 | 5,251,175   | Intergenic     | 1.69 | $3.62 \times 10^{-8}$  |
| rs78649715  | 16 | 5,261,545   | Intergenic     | 1.81 | $1.20 \times 10^{-8}$  |
| rs75893813  | 16 | 5,264,690   | Intergenic     | 1.81 | $1.20 \times 10^{-8}$  |
| rs60465971  | 16 | 5,267,215   | Intergenic     | 1.73 | $2.78 \times 10^{-8}$  |
| rs56256368  | 16 | 5,268,538   | Intergenic     | 1.77 | $2.01 \times 10^{-8}$  |
| rs56208627  | 16 | 5,268,667   | Intergenic     | 1.77 | $2.01 \times 10^{-8}$  |
| rs9932433   | 16 | 5,269,502   | Intergenic     | 1.77 | $2.01 \times 10^{-8}$  |
| rs13331940  | 16 | 5,269,820   | Intergenic     | 1.77 | $2.01 \times 10^{-8}$  |
| rs13331989  | 16 | 5,269,898   | Intergenic     | 1.77 | $2.01 \times 10^{-8}$  |
| rs9928451   | 16 | 5,271,022   | Intergenic     | 1.77 | $2.01 \times 10^{-8}$  |
| rs12232454  | 16 | 5,271,209   | Intergenic     | 1.77 | $2.01 \times 10^{-8}$  |
| rs59338239  | 16 | 5,271,629   | Intergenic     | 1.77 | $2.01 \times 10^{-8}$  |
| rs74783278  | 16 | 5,273,452   | Intergenic     | 1.77 | $2.01 \times 10^{-8}$  |
| rs77004033  | 16 | 5,276,073   | Intergenic     | 1.77 | $2.01 \times 10^{-8}$  |
| rs78047823  | 16 | 5,276,457   | Intergenic     | 1.77 | $2.01 \times 10^{-8}$  |
| rs117811257 | 16 | 5,276,484   | Intergenic     | 1.77 | $2.01 \times 10^{-8}$  |
| rs74249180  | 16 | 5,276,532   | Intergenic     | 1.77 | $2.01 \times 10^{-8}$  |
| rs12596315  | 16 | 19,488,434  | <i>TMC5</i>    | 1.75 | $8.82 \times 10^{-11}$ |
| rs62026182  | 16 | 19,519,911  | <i>GDE1</i>    | 1.72 | $2.54 \times 10^{-10}$ |
| rs72798056  | 16 | 50,184,574  | Intergenic     | 1.62 | $4.53 \times 10^{-8}$  |
| rs181029676 | 17 | 64,558,223  | <i>PRKCA</i>   | 1.85 | $5.61 \times 10^{-9}$  |
| rs62081992  | 18 | 14,257,266  | Intergenic     | 1.59 | $1.62 \times 10^{-8}$  |
| rs6131728   | 20 | 15,808,487  | <i>MACROD2</i> | 1.84 | $2.67 \times 10^{-9}$  |
| rs16996627  | 20 | 15,808,549  | <i>MACROD2</i> | 1.84 | $2.67 \times 10^{-9}$  |

|              |             |    |            |                |                             |
|--------------|-------------|----|------------|----------------|-----------------------------|
|              | rs6135568   | 20 | 15,829,764 | <i>MACROD2</i> | 1.81 4.91×10 <sup>-9</sup>  |
|              | rs73898562  | 20 | 15,843,015 | <i>MACROD2</i> | 1.65 3.08×10 <sup>-8</sup>  |
|              | rs6131734   | 20 | 15,846,783 | <i>MACROD2</i> | 1.62 4.78×10 <sup>-8</sup>  |
|              | rs12624918  | 20 | 15,854,901 | <i>MACROD2</i> | 1.75 1.78×10 <sup>-8</sup>  |
|              | rs12624919  | 20 | 15,854,910 | <i>MACROD2</i> | 1.63 4.65×10 <sup>-8</sup>  |
|              | rs12106174  | 20 | 16,508,484 | <i>KIF16B</i>  | 1.19 1.76×10 <sup>-8</sup>  |
|              | rs11699351  | 20 | 30,414,578 | <i>MYLK2</i>   | 2.29 2.31×10 <sup>-12</sup> |
|              | rs75200100  | 20 | 57,841,857 | Intergenic     | 1.49 2.34×10 <sup>-9</sup>  |
|              | rs79138162  | 20 | 57,853,496 | Intergenic     | 1.35 1.59×10 <sup>-8</sup>  |
|              | rs112716132 | 22 | 27,463,211 | Intergenic     | 1.76 1.14×10 <sup>-8</sup>  |
|              | rs6006621   | 22 | 44,419,407 | <i>PARVB</i>   | 1.88 5.88×10 <sup>-9</sup>  |
| <i>GNG12</i> | rs2404215   | 1  | 53,634,228 | Intergenic     | 0.25 3.48×10 <sup>-8</sup>  |
|              | rs75565762  | 1  | 60,841,810 | Intergenic     | 0.22 4.09×10 <sup>-9</sup>  |
|              | rs79676211  | 1  | 60,842,214 | Intergenic     | 0.22 4.09×10 <sup>-9</sup>  |
|              | rs113917246 | 1  | 72,176,973 | <i>NEGR1</i>   | 0.31 2.55×10 <sup>-10</sup> |
|              | rs72944123  | 1  | 72,184,768 | <i>NEGR1</i>   | 0.31 2.55×10 <sup>-10</sup> |
|              | rs57583829  | 1  | 72,187,974 | <i>NEGR1</i>   | 0.31 2.55×10 <sup>-10</sup> |
|              | rs72944128  | 1  | 72,191,623 | <i>NEGR1</i>   | 0.31 2.55×10 <sup>-10</sup> |
|              | rs72944129  | 1  | 72,195,446 | <i>NEGR1</i>   | 0.31 2.55×10 <sup>-10</sup> |
|              | rs74782184  | 1  | 72,197,134 | <i>NEGR1</i>   | 0.31 2.55×10 <sup>-10</sup> |
|              | rs12039538  | 1  | 72,198,671 | <i>NEGR1</i>   | 0.28 2.22×10 <sup>-9</sup>  |
|              | rs72944192  | 1  | 72,201,200 | <i>NEGR1</i>   | 0.31 2.55×10 <sup>-10</sup> |
|              | rs59851000  | 1  | 72,203,126 | <i>NEGR1</i>   | 0.31 2.55×10 <sup>-10</sup> |
|              | rs79404144  | 1  | 72,206,083 | <i>NEGR1</i>   | 0.32 1.46×10 <sup>-10</sup> |
|              | rs12037107  | 1  | 72,206,302 | <i>NEGR1</i>   | 0.31 2.55×10 <sup>-10</sup> |
|              | rs12030035  | 1  | 72,208,083 | <i>NEGR1</i>   | 0.31 2.55×10 <sup>-10</sup> |
|              | rs17091704  | 1  | 72,208,917 | <i>NEGR1</i>   | 0.31 2.55×10 <sup>-10</sup> |
|              | rs72944200  | 1  | 72,211,415 | <i>NEGR1</i>   | 0.31 2.55×10 <sup>-10</sup> |
|              | rs17091710  | 1  | 72,211,943 | <i>NEGR1</i>   | 0.31 2.55×10 <sup>-10</sup> |
|              | rs60397116  | 1  | 72,212,080 | <i>NEGR1</i>   | 0.31 2.55×10 <sup>-10</sup> |
|              | rs72946003  | 1  | 72,214,403 | <i>NEGR1</i>   | 0.31 2.55×10 <sup>-10</sup> |
|              | rs12043796  | 1  | 72,215,029 | <i>NEGR1</i>   | 0.31 2.55×10 <sup>-10</sup> |
|              | rs12023733  | 1  | 72,215,994 | <i>NEGR1</i>   | 0.31 2.55×10 <sup>-10</sup> |
|              | rs12023757  | 1  | 72,216,111 | <i>NEGR1</i>   | 0.31 2.55×10 <sup>-10</sup> |
|              | rs6671557   | 1  | 72,220,321 | <i>NEGR1</i>   | 0.32 1.46×10 <sup>-10</sup> |
|              | rs6697610   | 1  | 72,224,124 | <i>NEGR1</i>   | 0.31 2.55×10 <sup>-10</sup> |
|              | rs1459796   | 1  | 72,225,877 | <i>NEGR1</i>   | 0.31 2.55×10 <sup>-10</sup> |
|              | rs6424447   | 1  | 72,227,685 | <i>NEGR1</i>   | 0.31 2.55×10 <sup>-10</sup> |
|              | rs72946013  | 1  | 72,229,829 | <i>NEGR1</i>   | 0.32 1.37×10 <sup>-10</sup> |
|              | rs75459942  | 1  | 72,229,975 | <i>NEGR1</i>   | 0.32 1.37×10 <sup>-10</sup> |
|              | rs7541406   | 1  | 72,230,600 | <i>NEGR1</i>   | 0.32 1.37×10 <sup>-10</sup> |
|              | rs7546909   | 1  | 72,231,804 | <i>NEGR1</i>   | 0.29 1.02×10 <sup>-9</sup>  |
|              | rs72946022  | 1  | 72,235,227 | <i>NEGR1</i>   | 0.32 1.37×10 <sup>-10</sup> |
|              | rs72946034  | 1  | 72,238,267 | <i>NEGR1</i>   | 0.32 1.37×10 <sup>-10</sup> |
|              | rs6697370   | 1  | 72,238,691 | <i>NEGR1</i>   | 0.32 1.37×10 <sup>-10</sup> |
|              | rs12048869  | 1  | 72,244,453 | <i>NEGR1</i>   | 0.32 1.37×10 <sup>-10</sup> |
|              | rs7528030   | 1  | 72,247,277 | <i>NEGR1</i>   | 0.32 1.37×10 <sup>-10</sup> |
|              | rs12091362  | 1  | 72,249,523 | <i>NEGR1</i>   | 0.29 7.25×10 <sup>-10</sup> |
|              | rs12024388  | 1  | 72,253,577 | <i>NEGR1</i>   | 0.32 1.37×10 <sup>-10</sup> |

|             |    |             |                         |      |                        |
|-------------|----|-------------|-------------------------|------|------------------------|
| rs17091758  | 1  | 72,254,435  | <i>NEGR1</i>            | 0.32 | $1.37 \times 10^{-10}$ |
| rs11584866  | 1  | 72,255,977  | <i>NEGR1</i>            | 0.32 | $1.37 \times 10^{-10}$ |
| rs11588321  | 1  | 72,273,615  | <i>NEGR1; NEGR1-IT1</i> | 0.31 | $1.50 \times 10^{-10}$ |
| rs57227393  | 1  | 72,274,874  | <i>NEGR1; NEGR1-IT1</i> | 0.31 | $1.50 \times 10^{-10}$ |
| rs57839383  | 1  | 72,275,162  | <i>NEGR1; NEGR1-IT1</i> | 0.31 | $1.50 \times 10^{-10}$ |
| rs6701156   | 1  | 72,275,559  | <i>NEGR1; NEGR1-IT1</i> | 0.31 | $1.50 \times 10^{-10}$ |
| rs12074943  | 1  | 72,278,754  | <i>NEGR1; NEGR1-IT1</i> | 0.31 | $1.50 \times 10^{-10}$ |
| rs11209848  | 1  | 72,279,522  | <i>NEGR1; NEGR1-IT1</i> | 0.31 | $1.50 \times 10^{-10}$ |
| rs12078969  | 1  | 72,281,171  | <i>NEGR1; NEGR1-IT1</i> | 0.31 | $1.50 \times 10^{-10}$ |
| rs11902461  | 2  | 101,387,569 | Intergenic              | 0.30 | $4.81 \times 10^{-10}$ |
| rs72932979  | 2  | 159,387,819 | <i>PKP4</i>             | 0.23 | $4.37 \times 10^{-8}$  |
| rs72936956  | 2  | 159,416,104 | <i>PKP4</i>             | 0.23 | $4.64 \times 10^{-8}$  |
| rs111619399 | 2  | 159,455,245 | <i>PKP4</i>             | 0.23 | $4.64 \times 10^{-8}$  |
| rs147035326 | 3  | 40,655,466  | Intergenic              | 0.21 | $2.18 \times 10^{-8}$  |
| rs79410835  | 4  | 155,324,656 | <i>DCHS2</i>            | 0.28 | $1.18 \times 10^{-8}$  |
| rs73854735  | 4  | 155,325,552 | <i>DCHS2</i>            | 0.28 | $1.18 \times 10^{-8}$  |
| rs114203084 | 4  | 155,326,270 | <i>DCHS2</i>            | 0.28 | $1.18 \times 10^{-8}$  |
| rs114131286 | 4  | 155,326,645 | <i>DCHS2</i>            | 0.28 | $1.18 \times 10^{-8}$  |
| rs56155318  | 4  | 155,326,731 | <i>DCHS2</i>            | 0.28 | $1.18 \times 10^{-8}$  |
| rs77693626  | 4  | 155,328,505 | <i>DCHS2</i>            | 0.28 | $1.18 \times 10^{-8}$  |
| rs73854737  | 4  | 155,328,557 | <i>DCHS2</i>            | 0.28 | $1.18 \times 10^{-8}$  |
| rs28423376  | 4  | 155,330,056 | <i>DCHS2</i>            | 0.28 | $1.18 \times 10^{-8}$  |
| rs10007868  | 4  | 155,330,651 | <i>DCHS2</i>            | 0.28 | $1.18 \times 10^{-8}$  |
| rs10019687  | 4  | 155,332,367 | <i>DCHS2</i>            | 0.28 | $1.18 \times 10^{-8}$  |
| rs6839125   | 4  | 155,335,578 | <i>DCHS2</i>            | 0.28 | $2.63 \times 10^{-8}$  |
| rs114256572 | 4  | 155,335,897 | <i>DCHS2</i>            | 0.28 | $2.63 \times 10^{-8}$  |
| rs6536005   | 4  | 155,336,095 | <i>DCHS2</i>            | 0.28 | $2.63 \times 10^{-8}$  |
| rs74588432  | 6  | 140,249,098 | Intergenic              | 0.27 | $1.39 \times 10^{-8}$  |
| rs34231471  | 7  | 141,865,701 | Intergenic              | 0.29 | $1.27 \times 10^{-9}$  |
| rs73174816  | 13 | 41,352,622  | Intergenic              | 0.24 | $4.11 \times 10^{-9}$  |
| rs72646376  | 13 | 93,830,757  | Intergenic              | 0.26 | $3.70 \times 10^{-9}$  |
| rs12597420  | 16 | 81,171,330  | <i>PKDIL2</i>           | 0.28 | $9.05 \times 10^{-9}$  |
| rs11150347  | 16 | 81,171,411  | <i>PKDIL2</i>           | 0.28 | $9.05 \times 10^{-9}$  |
| rs28575151  | 16 | 81,171,903  | <i>PKDIL2</i>           | 0.28 | $9.05 \times 10^{-9}$  |
| rs4889243   | 16 | 81,173,030  | <i>PKDIL2</i>           | 0.28 | $9.05 \times 10^{-9}$  |
| rs77104177  | 16 | 81,173,051  | <i>PKDIL2</i>           | 0.28 | $9.05 \times 10^{-9}$  |
| rs12918619  | 16 | 81,173,136  | <i>PKDIL2</i>           | 0.28 | $9.05 \times 10^{-9}$  |
| rs28670519  | 16 | 81,173,741  | <i>PKDIL2</i>           | 0.28 | $1.76 \times 10^{-9}$  |
| rs76564490  | 16 | 81,177,874  | <i>PKDIL2</i>           | 0.25 | $4.08 \times 10^{-8}$  |
| rs7203293   | 16 | 81,179,280  | <i>PKDIL2</i>           | 0.24 | $3.87 \times 10^{-8}$  |
| rs140500028 | 16 | 88,527,691  | <i>ZFPM1</i>            | 0.28 | $1.46 \times 10^{-8}$  |
| rs75778010  | 19 | 48,268,900  | Intergenic              | 0.31 | $1.70 \times 10^{-10}$ |
| <i>GNG8</i> |    |             |                         |      |                        |
| rs143050684 | 2  | 161,264,315 | <i>RBMS1</i>            | 0.50 | $4.35 \times 10^{-8}$  |
| rs73018782  | 2  | 169,844,794 | <i>ABCB11</i>           | 0.55 | $1.07 \times 10^{-9}$  |
| rs60897043  | 2  | 169,845,099 | <i>ABCB11</i>           | 0.55 | $1.07 \times 10^{-9}$  |
| rs28846465  | 2  | 169,846,180 | <i>ABCB11</i>           | 0.55 | $1.07 \times 10^{-9}$  |
| rs4148780   | 2  | 169,847,203 | <i>ABCB11</i>           | 0.55 | $1.07 \times 10^{-9}$  |
| rs2287613   | 2  | 169,847,758 | <i>ABCB11</i>           | 0.55 | $1.07 \times 10^{-9}$  |
| rs61504845  | 2  | 169,856,729 | <i>ABCB11</i>           | 0.55 | $1.07 \times 10^{-9}$  |

|               |             |    |             |                  |      |                        |
|---------------|-------------|----|-------------|------------------|------|------------------------|
|               | rs73020774  | 2  | 169,857,087 | <i>ABCB11</i>    | 0.55 | $1.07 \times 10^{-9}$  |
|               | rs13400716  | 2  | 169,857,476 | <i>ABCB11</i>    | 0.55 | $1.07 \times 10^{-9}$  |
|               | rs6733156   | 2  | 169,857,566 | <i>ABCB11</i>    | 0.55 | $1.07 \times 10^{-9}$  |
|               | rs11898632  | 2  | 169,858,577 | <i>ABCB11</i>    | 0.55 | $1.07 \times 10^{-9}$  |
|               | rs112779928 | 2  | 169,859,716 | <i>ABCB11</i>    | 0.55 | $1.07 \times 10^{-9}$  |
|               | rs2892806   | 2  | 169,860,302 | <i>ABCB11</i>    | 0.55 | $1.07 \times 10^{-9}$  |
|               | rs56706166  | 2  | 169,860,690 | <i>ABCB11</i>    | 0.55 | $1.07 \times 10^{-9}$  |
|               | rs10200158  | 2  | 169,860,718 | <i>ABCB11</i>    | 0.55 | $1.07 \times 10^{-9}$  |
|               | rs11890609  | 2  | 169,861,727 | <i>ABCB11</i>    | 0.55 | $1.07 \times 10^{-9}$  |
|               | rs10196426  | 2  | 169,863,259 | <i>ABCB11</i>    | 0.55 | $1.20 \times 10^{-9}$  |
|               | rs10184113  | 2  | 169,863,381 | <i>ABCB11</i>    | 0.55 | $1.07 \times 10^{-9}$  |
|               | rs73020800  | 2  | 169,864,638 | <i>ABCB11</i>    | 0.55 | $1.07 \times 10^{-9}$  |
|               | rs73022704  | 2  | 169,864,985 | <i>ABCB11</i>    | 0.55 | $1.07 \times 10^{-9}$  |
|               | rs12613034  | 2  | 169,866,414 | <i>ABCB11</i>    | 0.55 | $1.07 \times 10^{-9}$  |
|               | rs6751775   | 2  | 169,867,230 | <i>ABCB11</i>    | 0.55 | $1.07 \times 10^{-9}$  |
|               | rs3770600   | 2  | 169,868,253 | <i>ABCB11</i>    | 0.55 | $1.07 \times 10^{-9}$  |
|               | rs10179758  | 2  | 169,868,814 | <i>ABCB11</i>    | 0.55 | $1.07 \times 10^{-9}$  |
|               | rs6759871   | 2  | 169,869,331 | <i>ABCB11</i>    | 0.55 | $1.07 \times 10^{-9}$  |
|               | rs2241339   | 2  | 169,870,295 | <i>ABCB11</i>    | 0.55 | $1.07 \times 10^{-9}$  |
|               | rs4148776   | 2  | 169,870,882 | <i>ABCB11</i>    | 0.55 | $1.07 \times 10^{-9}$  |
|               | rs10172795  | 2  | 169,872,462 | <i>ABCB11</i>    | 0.55 | $1.07 \times 10^{-9}$  |
|               | rs11892966  | 2  | 169,875,736 | <i>ABCB11</i>    | 0.55 | $1.07 \times 10^{-9}$  |
|               | rs73024744  | 2  | 169,877,791 | <i>ABCB11</i>    | 0.55 | $1.07 \times 10^{-9}$  |
|               | rs13387523  | 2  | 169,878,438 | <i>ABCB11</i>    | 0.55 | $3.12 \times 10^{-10}$ |
| <i>IGF1R</i>  | rs17864188  | 7  | 126,945,192 | Intergenic       | 0.26 | $4.82 \times 10^{-8}$  |
|               | rs111519389 | 7  | 126,950,238 | Intergenic       | 0.26 | $4.82 \times 10^{-8}$  |
|               | rs17862354  | 7  | 126,962,160 | Intergenic       | 0.26 | $4.82 \times 10^{-8}$  |
|               | rs17862357  | 7  | 126,973,697 | Intergenic       | 0.26 | $4.82 \times 10^{-8}$  |
|               | rs17862363  | 7  | 127,001,382 | Intergenic       | 0.26 | $4.82 \times 10^{-8}$  |
|               | rs17867837  | 7  | 127,006,827 | Intergenic       | 0.26 | $4.82 \times 10^{-8}$  |
|               | rs17867838  | 7  | 127,007,978 | Intergenic       | 0.26 | $4.82 \times 10^{-8}$  |
|               | rs117187446 | 7  | 127,066,432 | Intergenic       | 0.27 | $4.67 \times 10^{-8}$  |
|               | rs117612403 | 7  | 127,066,906 | Intergenic       | 0.27 | $4.67 \times 10^{-8}$  |
|               | rs80126810  | 12 | 11,346,513  | Intergenic       | 0.28 | $3.88 \times 10^{-10}$ |
| <i>IKBKB</i>  | rs112759756 | 18 | 6,780,462   | Intergenic       | 7.09 | $2.51 \times 10^{-8}$  |
|               | rs118019062 | 20 | 41,640,413  | <i>PTPRT</i>     | 6.72 | $7.63 \times 10^{-9}$  |
| <i>IKBKG</i>  | rs911503    | 14 | 36,485,635  | Intergenic       | 1.96 | $3.12 \times 10^{-8}$  |
| <i>IL2RA</i>  | rs11762786  | 7  | 156,382,428 | <i>LINC01006</i> | 2.97 | $6.51 \times 10^{-9}$  |
| <i>ILAR</i>   | rs10824468  | 10 | 78,671,628  | <i>KCNMA1</i>    | 3.00 | $4.28 \times 10^{-8}$  |
| <i>IL6R</i>   | rs112677917 | 11 | 40,221,687  | <i>LRRC4C</i>    | 6.68 | $9.76 \times 10^{-11}$ |
|               | rs72795903  | 16 | 28,989,633  | <i>SPNS1</i>     | 6.33 | $2.06 \times 10^{-9}$  |
| <i>ITGA11</i> | rs7532303   | 1  | 44,864,049  | Intergenic       | 0.31 | $1.67 \times 10^{-8}$  |
|               | rs12405914  | 1  | 44,871,575  | <i>RNF220</i>    | 0.31 | $1.67 \times 10^{-8}$  |
|               | rs77106564  | 1  | 44,872,010  | <i>RNF220</i>    | 0.31 | $1.67 \times 10^{-8}$  |
|               | rs77924537  | 1  | 44,872,215  | <i>RNF220</i>    | 0.31 | $1.67 \times 10^{-8}$  |
|               | rs112437613 | 1  | 57,647,715  | <i>DABI</i>      | 0.29 | $3.41 \times 10^{-8}$  |
|               | rs10889183  | 1  | 60,999,977  | Intergenic       | 0.33 | $4.13 \times 10^{-8}$  |
|               | rs4454572   | 1  | 61,003,101  | Intergenic       | 0.33 | $4.13 \times 10^{-8}$  |
|               | rs112593979 | 1  | 72,663,293  | <i>NEGR1</i>     | 0.35 | $1.41 \times 10^{-9}$  |

|             |   |             |               |      |                        |
|-------------|---|-------------|---------------|------|------------------------|
| rs11164685  | 1 | 103,598,908 | Intergenic    | 0.30 | $3.03 \times 10^{-8}$  |
| rs79442714  | 1 | 113,833,382 | Intergenic    | 0.33 | $5.60 \times 10^{-9}$  |
| rs12756965  | 1 | 113,839,149 | Intergenic    | 0.33 | $5.60 \times 10^{-9}$  |
| rs12045733  | 1 | 113,848,704 | Intergenic    | 0.33 | $5.60 \times 10^{-9}$  |
| rs12038527  | 1 | 113,848,729 | Intergenic    | 0.33 | $5.60 \times 10^{-9}$  |
| rs4839306   | 1 | 113,849,470 | Intergenic    | 0.33 | $5.60 \times 10^{-9}$  |
| rs12048530  | 1 | 113,851,139 | Intergenic    | 0.33 | $5.60 \times 10^{-9}$  |
| rs12046318  | 1 | 113,854,250 | Intergenic    | 0.33 | $5.60 \times 10^{-9}$  |
| rs35059446  | 1 | 113,858,904 | Intergenic    | 0.33 | $5.60 \times 10^{-9}$  |
| rs142534849 | 1 | 181,041,664 | Intergenic    | 0.34 | $1.60 \times 10^{-9}$  |
| rs78878780  | 1 | 219,017,425 | Intergenic    | 0.38 | $3.78 \times 10^{-11}$ |
| rs80220156  | 1 | 219,017,470 | Intergenic    | 0.38 | $3.78 \times 10^{-11}$ |
| rs17574573  | 1 | 219,024,035 | Intergenic    | 0.38 | $3.78 \times 10^{-11}$ |
| rs76709448  | 1 | 219,028,085 | Intergenic    | 0.38 | $3.78 \times 10^{-11}$ |
| rs74329588  | 1 | 219,030,178 | Intergenic    | 0.38 | $3.78 \times 10^{-11}$ |
| rs80261364  | 1 | 219,039,895 | Intergenic    | 0.36 | $1.15 \times 10^{-10}$ |
| rs17574961  | 1 | 219,040,761 | Intergenic    | 0.36 | $1.15 \times 10^{-10}$ |
| rs79769748  | 1 | 219,042,771 | Intergenic    | 0.36 | $1.15 \times 10^{-10}$ |
| rs79112139  | 1 | 219,043,164 | Intergenic    | 0.36 | $1.15 \times 10^{-10}$ |
| rs80121977  | 1 | 219,046,348 | Intergenic    | 0.36 | $1.15 \times 10^{-10}$ |
| rs924269    | 1 | 219,051,503 | Intergenic    | 0.36 | $1.15 \times 10^{-10}$ |
| rs17575281  | 1 | 219,053,082 | Intergenic    | 0.34 | $3.78 \times 10^{-10}$ |
| rs59987725  | 1 | 219,055,174 | Intergenic    | 0.35 | $2.21 \times 10^{-10}$ |
| rs115992574 | 2 | 14,798,479  | Intergenic    | 0.34 | $5.07 \times 10^{-10}$ |
| rs76404547  | 2 | 14,848,655  | Intergenic    | 0.31 | $3.41 \times 10^{-9}$  |
| rs79873290  | 2 | 14,956,721  | Intergenic    | 0.34 | $6.23 \times 10^{-10}$ |
| rs75893593  | 2 | 32,767,202  | <i>BIRC6</i>  | 0.27 | $2.12 \times 10^{-8}$  |
| rs17011993  | 2 | 32,769,351  | <i>BIRC6</i>  | 0.33 | $5.28 \times 10^{-10}$ |
| rs3917268   | 2 | 102,778,862 | <i>IL1R1</i>  | 0.32 | $1.21 \times 10^{-8}$  |
| rs3917291   | 2 | 102,782,166 | <i>IL1R1</i>  | 0.31 | $1.93 \times 10^{-8}$  |
| rs3917314   | 2 | 102,790,863 | <i>IL1R1</i>  | 0.30 | $4.43 \times 10^{-8}$  |
| rs3917320   | 2 | 102,792,875 | <i>IL1R1</i>  | 0.31 | $1.93 \times 10^{-8}$  |
| rs3917325   | 2 | 102,793,907 | <i>IL1R1</i>  | 0.31 | $1.93 \times 10^{-8}$  |
| rs3917328   | 2 | 102,794,541 | <i>IL1R1</i>  | 0.31 | $1.93 \times 10^{-8}$  |
| rs13003489  | 2 | 102,801,502 | Intergenic    | 0.31 | $1.93 \times 10^{-8}$  |
| rs13017584  | 2 | 102,803,444 | <i>IL1RL2</i> | 0.31 | $1.93 \times 10^{-8}$  |
| rs13009757  | 2 | 102,912,174 | Intergenic    | 0.30 | $9.56 \times 10^{-9}$  |
| rs62152138  | 2 | 103,324,335 | <i>SLC9A2</i> | 0.34 | $5.60 \times 10^{-9}$  |
| rs7562520   | 2 | 160,019,065 | <i>TANCI</i>  | 0.31 | $3.53 \times 10^{-8}$  |
| rs116041633 | 2 | 233,240,889 | Intergenic    | 0.31 | $2.37 \times 10^{-8}$  |
| rs56035150  | 3 | 2,357,581   | <i>CNTN4</i>  | 0.34 | $7.46 \times 10^{-11}$ |
| rs77976373  | 3 | 2,372,455   | <i>CNTN4</i>  | 0.34 | $7.46 \times 10^{-11}$ |
| rs79007158  | 3 | 2,380,198   | <i>CNTN4</i>  | 0.34 | $7.46 \times 10^{-11}$ |
| rs75549677  | 3 | 2,385,042   | <i>CNTN4</i>  | 0.27 | $7.73 \times 10^{-9}$  |
| rs75533829  | 3 | 2,410,457   | <i>CNTN4</i>  | 0.27 | $7.80 \times 10^{-9}$  |
| rs3913588   | 3 | 2,416,252   | <i>CNTN4</i>  | 0.28 | $4.85 \times 10^{-9}$  |
| rs17013461  | 3 | 2,416,684   | <i>CNTN4</i>  | 0.28 | $4.85 \times 10^{-9}$  |
| rs17013465  | 3 | 2,416,697   | <i>CNTN4</i>  | 0.28 | $4.85 \times 10^{-9}$  |
| rs17013467  | 3 | 2,417,521   | <i>CNTN4</i>  | 0.28 | $4.85 \times 10^{-9}$  |



|             |   |             |              |      |                        |
|-------------|---|-------------|--------------|------|------------------------|
| rs17013472  | 3 | 2,418,494   | <i>CNTN4</i> | 0.28 | $4.85 \times 10^{-9}$  |
| rs57270584  | 3 | 2,419,885   | <i>CNTN4</i> | 0.28 | $4.85 \times 10^{-9}$  |
| rs1827452   | 3 | 2,420,109   | <i>CNTN4</i> | 0.28 | $4.85 \times 10^{-9}$  |
| rs17013494  | 3 | 2,420,610   | <i>CNTN4</i> | 0.28 | $4.85 \times 10^{-9}$  |
| rs79739371  | 3 | 2,421,656   | <i>CNTN4</i> | 0.28 | $4.85 \times 10^{-9}$  |
| rs17013524  | 3 | 2,423,127   | <i>CNTN4</i> | 0.28 | $4.85 \times 10^{-9}$  |
| rs78855680  | 3 | 2,423,237   | <i>CNTN4</i> | 0.28 | $4.85 \times 10^{-9}$  |
| rs74691141  | 3 | 2,424,326   | <i>CNTN4</i> | 0.27 | $8.23 \times 10^{-9}$  |
| rs11926996  | 3 | 2,426,089   | <i>CNTN4</i> | 0.29 | $2.18 \times 10^{-9}$  |
| rs74854613  | 3 | 32,344,350  | <i>CMTM8</i> | 0.29 | $3.05 \times 10^{-8}$  |
| rs34406434  | 3 | 89,432,122  | <i>EPHA3</i> | 0.30 | $1.69 \times 10^{-8}$  |
| rs9880275   | 3 | 90,039,009  | Intergenic   | 0.32 | $1.14 \times 10^{-8}$  |
| rs9815846   | 3 | 90,040,987  | Intergenic   | 0.32 | $1.14 \times 10^{-8}$  |
| rs7620479   | 3 | 90,180,643  | Intergenic   | 0.31 | $3.09 \times 10^{-9}$  |
| rs7428470   | 3 | 90,207,606  | Intergenic   | 0.27 | $2.78 \times 10^{-8}$  |
| rs9828400   | 3 | 90,214,028  | Intergenic   | 0.28 | $9.96 \times 10^{-9}$  |
| rs6798310   | 3 | 90,224,813  | Intergenic   | 0.28 | $9.96 \times 10^{-9}$  |
| rs6787796   | 3 | 90,225,446  | Intergenic   | 0.28 | $9.96 \times 10^{-9}$  |
| rs7653160   | 3 | 90,242,405  | Intergenic   | 0.28 | $9.96 \times 10^{-9}$  |
| rs7432423   | 3 | 90,247,905  | Intergenic   | 0.28 | $9.96 \times 10^{-9}$  |
| rs6803112   | 3 | 90,264,768  | Intergenic   | 0.28 | $9.96 \times 10^{-9}$  |
| rs9865441   | 3 | 90,266,420  | Intergenic   | 0.28 | $9.96 \times 10^{-9}$  |
| rs7429659   | 3 | 90,274,805  | Intergenic   | 0.28 | $9.96 \times 10^{-9}$  |
| rs6551462   | 3 | 90,287,332  | Intergenic   | 0.28 | $9.96 \times 10^{-9}$  |
| rs2316811   | 3 | 90,313,054  | Intergenic   | 0.28 | $1.42 \times 10^{-8}$  |
| rs112050167 | 3 | 90,324,265  | Intergenic   | 0.28 | $1.27 \times 10^{-8}$  |
| rs115336235 | 3 | 90,358,752  | Intergenic   | 0.30 | $4.40 \times 10^{-9}$  |
| rs137963600 | 3 | 90,360,952  | Intergenic   | 0.28 | $1.42 \times 10^{-8}$  |
| rs149438476 | 3 | 90,362,869  | Intergenic   | 0.30 | $5.70 \times 10^{-9}$  |
| rs116179516 | 3 | 90,402,280  | Intergenic   | 0.28 | $1.42 \times 10^{-8}$  |
| rs144390463 | 3 | 90,420,614  | Intergenic   | 0.28 | $1.42 \times 10^{-8}$  |
| rs150306267 | 3 | 90,424,253  | Intergenic   | 0.28 | $1.42 \times 10^{-8}$  |
| rs141135945 | 3 | 90,428,237  | Intergenic   | 0.29 | $5.56 \times 10^{-10}$ |
| rs150483042 | 3 | 90,431,083  | Intergenic   | 0.31 | $2.36 \times 10^{-9}$  |
| rs184655552 | 3 | 90,432,562  | Intergenic   | 0.31 | $3.14 \times 10^{-9}$  |
| rs144677859 | 3 | 90,435,679  | Intergenic   | 0.31 | $2.22 \times 10^{-9}$  |
| rs141940565 | 3 | 90,435,940  | Intergenic   | 0.31 | $2.22 \times 10^{-9}$  |
| rs35668670  | 3 | 90,437,848  | Intergenic   | 0.28 | $1.42 \times 10^{-8}$  |
| rs115126456 | 3 | 90,441,404  | Intergenic   | 0.28 | $1.42 \times 10^{-8}$  |
| rs115941982 | 3 | 90,468,230  | Intergenic   | 0.28 | $1.27 \times 10^{-8}$  |
| rs58841348  | 3 | 90,470,443  | Intergenic   | 0.28 | $1.27 \times 10^{-8}$  |
| rs141308579 | 3 | 90,483,384  | Intergenic   | 0.31 | $2.56 \times 10^{-8}$  |
| rs143661400 | 3 | 90,483,386  | Intergenic   | 0.31 | $2.56 \times 10^{-8}$  |
| rs116080896 | 3 | 90,484,094  | Intergenic   | 0.28 | $1.29 \times 10^{-8}$  |
| rs114196277 | 3 | 188,458,771 | <i>LPP</i>   | 0.32 | $1.30 \times 10^{-9}$  |
| rs2720915   | 3 | 194,722,729 | Intergenic   | 0.29 | $1.91 \times 10^{-8}$  |
| rs2720914   | 3 | 194,722,866 | Intergenic   | 0.29 | $1.91 \times 10^{-8}$  |
| rs2720911   | 3 | 194,726,720 | Intergenic   | 0.29 | $1.91 \times 10^{-8}$  |
| rs2676832   | 3 | 194,727,026 | Intergenic   | 0.29 | $1.91 \times 10^{-8}$  |

|             |   |             |               |      |                        |
|-------------|---|-------------|---------------|------|------------------------|
| rs114358991 | 4 | 1,047,424   | Intergenic    | 0.33 | $2.63 \times 10^{-8}$  |
| rs13128743  | 4 | 7,301,089   | <i>SORCS2</i> | 0.33 | $2.95 \times 10^{-9}$  |
| rs10937801  | 4 | 7,302,000   | <i>SORCS2</i> | 0.25 | $1.98 \times 10^{-8}$  |
| rs1532665   | 4 | 7,303,572   | <i>SORCS2</i> | 0.24 | $3.17 \times 10^{-8}$  |
| rs1532664   | 4 | 7,303,726   | <i>SORCS2</i> | 0.24 | $3.17 \times 10^{-8}$  |
| rs1546266   | 4 | 7,304,807   | <i>SORCS2</i> | 0.24 | $4.91 \times 10^{-8}$  |
| rs36192013  | 4 | 8,740,880   | Intergenic    | 0.31 | $1.02 \times 10^{-8}$  |
| rs7669150   | 4 | 16,085,522  | <i>PROM1</i>  | 0.27 | $4.41 \times 10^{-8}$  |
| rs55932807  | 4 | 90,753,339  | <i>SNCA</i>   | 0.30 | $2.89 \times 10^{-8}$  |
| rs79507245  | 4 | 102,046,408 | <i>PPP3CA</i> | 0.34 | $2.36 \times 10^{-9}$  |
| rs74675949  | 4 | 102,046,629 | <i>PPP3CA</i> | 0.34 | $2.36 \times 10^{-9}$  |
| rs78209620  | 4 | 102,047,770 | <i>PPP3CA</i> | 0.34 | $2.36 \times 10^{-9}$  |
| rs78888749  | 4 | 102,047,812 | <i>PPP3CA</i> | 0.34 | $2.36 \times 10^{-9}$  |
| rs113609659 | 4 | 102,049,484 | <i>PPP3CA</i> | 0.33 | $4.82 \times 10^{-9}$  |
| rs115008357 | 4 | 102,050,892 | <i>PPP3CA</i> | 0.34 | $2.36 \times 10^{-9}$  |
| rs142191092 | 4 | 102,052,036 | <i>PPP3CA</i> | 0.34 | $2.36 \times 10^{-9}$  |
| rs139686096 | 4 | 102,054,847 | <i>PPP3CA</i> | 0.34 | $2.36 \times 10^{-9}$  |
| rs113473645 | 4 | 102,057,622 | <i>PPP3CA</i> | 0.34 | $2.36 \times 10^{-9}$  |
| rs111885453 | 4 | 102,059,408 | <i>PPP3CA</i> | 0.34 | $2.36 \times 10^{-9}$  |
| rs150119589 | 4 | 102,060,085 | <i>PPP3CA</i> | 0.34 | $2.36 \times 10^{-9}$  |
| rs113188556 | 4 | 102,060,940 | <i>PPP3CA</i> | 0.34 | $2.36 \times 10^{-9}$  |
| rs113496555 | 4 | 102,061,144 | <i>PPP3CA</i> | 0.34 | $2.36 \times 10^{-9}$  |
| rs112039584 | 4 | 102,061,563 | <i>PPP3CA</i> | 0.34 | $2.36 \times 10^{-9}$  |
| rs80183680  | 4 | 102,061,572 | <i>PPP3CA</i> | 0.34 | $2.36 \times 10^{-9}$  |
| rs116229517 | 4 | 102,061,766 | <i>PPP3CA</i> | 0.34 | $2.36 \times 10^{-9}$  |
| rs112122964 | 4 | 102,061,822 | <i>PPP3CA</i> | 0.34 | $2.36 \times 10^{-9}$  |
| rs74631130  | 4 | 102,062,069 | <i>PPP3CA</i> | 0.34 | $2.36 \times 10^{-9}$  |
| rs111752790 | 4 | 102,063,270 | <i>PPP3CA</i> | 0.34 | $2.36 \times 10^{-9}$  |
| rs113744576 | 4 | 102,064,126 | <i>PPP3CA</i> | 0.34 | $2.36 \times 10^{-9}$  |
| rs112973280 | 4 | 102,064,899 | <i>PPP3CA</i> | 0.34 | $2.36 \times 10^{-9}$  |
| rs112695279 | 4 | 102,065,144 | <i>PPP3CA</i> | 0.34 | $2.36 \times 10^{-9}$  |
| rs75372805  | 4 | 102,065,533 | <i>PPP3CA</i> | 0.34 | $2.36 \times 10^{-9}$  |
| rs17240082  | 4 | 102,065,719 | <i>PPP3CA</i> | 0.34 | $2.36 \times 10^{-9}$  |
| rs113471888 | 4 | 102,069,519 | <i>PPP3CA</i> | 0.34 | $2.36 \times 10^{-9}$  |
| rs112522326 | 4 | 102,071,777 | <i>PPP3CA</i> | 0.34 | $2.36 \times 10^{-9}$  |
| rs111792710 | 4 | 102,073,273 | <i>PPP3CA</i> | 0.34 | $2.36 \times 10^{-9}$  |
| rs192402944 | 4 | 129,628,719 | Intergenic    | 0.29 | $4.58 \times 10^{-8}$  |
| rs184741912 | 4 | 129,628,720 | Intergenic    | 0.29 | $4.58 \times 10^{-8}$  |
| rs189724000 | 4 | 129,628,727 | Intergenic    | 0.29 | $3.39 \times 10^{-8}$  |
| rs13147782  | 4 | 131,034,260 | Intergenic    | 0.33 | $3.88 \times 10^{-8}$  |
| rs116135844 | 4 | 168,179,343 | Intergenic    | 0.37 | $4.27 \times 10^{-10}$ |
| rs59370581  | 4 | 168,846,612 | Intergenic    | 0.36 | $4.29 \times 10^{-11}$ |
| rs115973927 | 4 | 181,655,290 | Intergenic    | 0.37 | $3.48 \times 10^{-10}$ |
| rs184754365 | 4 | 182,551,359 | Intergenic    | 0.30 | $2.24 \times 10^{-8}$  |
| rs72706718  | 5 | 1,884,638   | <i>IRX4</i>   | 0.32 | $2.48 \times 10^{-8}$  |
| rs72706719  | 5 | 1,885,964   | <i>IRX4</i>   | 0.32 | $2.48 \times 10^{-8}$  |
| rs16899797  | 5 | 31,804,402  | <i>PDZD2</i>  | 0.28 | $4.53 \times 10^{-8}$  |
| rs4867383   | 5 | 31,807,304  | <i>PDZD2</i>  | 0.29 | $3.88 \times 10^{-8}$  |
| rs72755993  | 5 | 41,398,835  | <i>PLCXD3</i> | 0.29 | $2.31 \times 10^{-9}$  |

|             |   |             |                     |      |                        |
|-------------|---|-------------|---------------------|------|------------------------|
| rs252751    | 5 | 77,389,213  | <i>AP3B1</i>        | 0.29 | $3.30 \times 10^{-8}$  |
| rs73246227  | 5 | 117,457,849 | <i>LOC102467224</i> | 0.33 | $2.65 \times 10^{-8}$  |
| rs151145004 | 5 | 117,510,361 | <i>LOC102467224</i> | 0.32 | $2.81 \times 10^{-8}$  |
| rs73246174  | 5 | 117,510,430 | <i>LOC102467224</i> | 0.32 | $2.81 \times 10^{-8}$  |
| rs73246178  | 5 | 117,510,611 | <i>LOC102467224</i> | 0.32 | $2.81 \times 10^{-8}$  |
| rs73246751  | 5 | 117,518,968 | <i>LOC102467224</i> | 0.32 | $2.81 \times 10^{-8}$  |
| rs17143707  | 5 | 117,522,041 | <i>LOC102467224</i> | 0.31 | $4.60 \times 10^{-8}$  |
| rs11948947  | 5 | 150,971,790 | Intergenic          | 0.32 | $2.21 \times 10^{-8}$  |
| rs9502434   | 6 | 6,326,042   | Intergenic          | 0.31 | $1.89 \times 10^{-8}$  |
| rs9504762   | 6 | 6,332,865   | Intergenic          | 0.29 | $3.90 \times 10^{-8}$  |
| rs17379732  | 6 | 6,342,180   | Intergenic          | 0.30 | $2.42 \times 10^{-8}$  |
| rs17142071  | 6 | 6,342,377   | Intergenic          | 0.30 | $2.42 \times 10^{-8}$  |
| rs111934886 | 6 | 14,339,896  | Intergenic          | 0.34 | $8.49 \times 10^{-9}$  |
| rs149324894 | 6 | 32,481,795  | Intergenic          | 0.23 | $1.65 \times 10^{-8}$  |
| rs12207336  | 6 | 65,882,792  | <i>EYS</i>          | 0.31 | $1.47 \times 10^{-8}$  |
| rs79091857  | 6 | 115,205,433 | Intergenic          | 0.31 | $6.63 \times 10^{-9}$  |
| rs76821212  | 6 | 165,921,617 | <i>PDE10A</i>       | 0.34 | $3.45 \times 10^{-9}$  |
| rs62436764  | 6 | 167,456,485 | Intergenic          | 0.34 | $3.15 \times 10^{-9}$  |
| rs55782534  | 7 | 9,381,826   | Intergenic          | 0.32 | $4.69 \times 10^{-8}$  |
| rs73088242  | 7 | 25,197,526  | <i>C7orf31</i>      | 0.28 | $2.96 \times 10^{-8}$  |
| rs62446904  | 7 | 30,754,538  | Intergenic          | 0.34 | $1.44 \times 10^{-9}$  |
| rs74657816  | 7 | 46,670,682  | Intergenic          | 0.34 | $5.87 \times 10^{-10}$ |
| rs73158622  | 7 | 139,449,008 | <i>HIPK2</i>        | 0.34 | $1.79 \times 10^{-9}$  |
| rs73739645  | 7 | 156,044,610 | Intergenic          | 0.31 | $1.30 \times 10^{-8}$  |
| rs11974690  | 7 | 156,047,516 | Intergenic          | 0.31 | $1.30 \times 10^{-8}$  |
| rs10234772  | 7 | 156,047,717 | Intergenic          | 0.31 | $1.68 \times 10^{-8}$  |
| rs11973416  | 7 | 156,047,826 | Intergenic          | 0.31 | $1.30 \times 10^{-8}$  |
| rs57629563  | 7 | 156,048,245 | Intergenic          | 0.31 | $1.30 \times 10^{-8}$  |
| rs57178781  | 7 | 156,048,937 | Intergenic          | 0.31 | $1.30 \times 10^{-8}$  |
| rs73739653  | 7 | 156,049,991 | Intergenic          | 0.31 | $1.30 \times 10^{-8}$  |
| rs11973944  | 7 | 156,053,063 | Intergenic          | 0.31 | $1.30 \times 10^{-8}$  |
| rs73739660  | 7 | 156,056,493 | Intergenic          | 0.29 | $3.59 \times 10^{-8}$  |
| rs73739661  | 7 | 156,056,802 | Intergenic          | 0.29 | $3.59 \times 10^{-8}$  |
| rs11977766  | 7 | 156,057,327 | Intergenic          | 0.29 | $3.59 \times 10^{-8}$  |
| rs55693286  | 7 | 156,059,923 | Intergenic          | 0.30 | $2.62 \times 10^{-8}$  |
| rs55906846  | 8 | 8,922,476   | Intergenic          | 0.31 | $7.06 \times 10^{-9}$  |
| rs11777327  | 8 | 8,996,329   | <i>PPP1R3B</i>      | 0.30 | $1.09 \times 10^{-8}$  |
| rs17704885  | 8 | 8,997,562   | <i>PPP1R3B</i>      | 0.30 | $8.04 \times 10^{-9}$  |
| rs4289770   | 8 | 10,487,222  | <i>RPIL1</i>        | 0.32 | $6.52 \times 10^{-9}$  |
| rs17222373  | 8 | 74,546,481  | <i>STAU2</i>        | 0.32 | $4.58 \times 10^{-9}$  |
| rs112655948 | 8 | 81,512,601  | Intergenic          | 0.31 | $1.74 \times 10^{-8}$  |
| rs75425780  | 8 | 81,514,508  | Intergenic          | 0.30 | $2.20 \times 10^{-8}$  |
| rs80217028  | 8 | 81,517,118  | Intergenic          | 0.30 | $2.20 \times 10^{-8}$  |
| rs113743401 | 8 | 81,517,545  | Intergenic          | 0.30 | $2.20 \times 10^{-8}$  |
| rs79125477  | 8 | 81,523,135  | Intergenic          | 0.31 | $2.08 \times 10^{-8}$  |
| rs150034497 | 8 | 82,482,289  | Intergenic          | 0.32 | $4.84 \times 10^{-8}$  |
| rs10093136  | 8 | 99,401,982  | Intergenic          | 0.32 | $3.52 \times 10^{-8}$  |
| rs72734082  | 8 | 136,718,766 | Intergenic          | 0.32 | $4.33 \times 10^{-9}$  |
| rs147486424 | 9 | 92,945,616  | Intergenic          | 0.28 | $1.78 \times 10^{-8}$  |

|             |    |             |               |      |                       |
|-------------|----|-------------|---------------|------|-----------------------|
| rs79540864  | 9  | 92,948,067  | Intergenic    | 0.27 | $2.84 \times 10^{-8}$ |
| rs147414187 | 9  | 92,952,046  | Intergenic    | 0.27 | $3.66 \times 10^{-8}$ |
| rs56244040  | 9  | 92,953,458  | Intergenic    | 0.27 | $3.66 \times 10^{-8}$ |
| rs111396481 | 9  | 92,967,753  | Intergenic    | 0.27 | $3.66 \times 10^{-8}$ |
| rs112441344 | 9  | 92,969,766  | Intergenic    | 0.27 | $3.66 \times 10^{-8}$ |
| rs144166209 | 9  | 92,975,418  | Intergenic    | 0.28 | $1.81 \times 10^{-8}$ |
| rs117943175 | 9  | 92,979,660  | Intergenic    | 0.27 | $4.24 \times 10^{-8}$ |
| rs74882880  | 9  | 92,986,030  | Intergenic    | 0.27 | $1.90 \times 10^{-8}$ |
| rs9696920   | 9  | 94,829,588  | <i>SPTLC1</i> | 0.31 | $4.00 \times 10^{-8}$ |
| rs7919350   | 10 | 6,363,948   | Intergenic    | 0.32 | $2.35 \times 10^{-9}$ |
| rs78967058  | 10 | 54,404,231  | Intergenic    | 0.30 | $1.48 \times 10^{-8}$ |
| rs116983082 | 10 | 60,466,398  | <i>BICCI</i>  | 0.31 | $5.71 \times 10^{-9}$ |
| rs7917505   | 10 | 70,974,481  | Intergenic    | 0.33 | $2.43 \times 10^{-8}$ |
| rs61873932  | 10 | 102,903,882 | Intergenic    | 0.28 | $3.18 \times 10^{-8}$ |
| rs61873933  | 10 | 102,904,521 | Intergenic    | 0.28 | $3.18 \times 10^{-8}$ |
| rs143946272 | 10 | 103,116,650 | <i>BTRC</i>   | 0.25 | $2.72 \times 10^{-8}$ |
| rs77691531  | 10 | 103,123,526 | <i>BTRC</i>   | 0.25 | $2.72 \times 10^{-8}$ |
| rs149480420 | 10 | 103,134,103 | <i>BTRC</i>   | 0.24 | $3.63 \times 10^{-8}$ |
| rs138970392 | 10 | 103,138,438 | <i>BTRC</i>   | 0.25 | $2.72 \times 10^{-8}$ |
| rs17760556  | 10 | 103,138,615 | <i>BTRC</i>   | 0.25 | $2.72 \times 10^{-8}$ |
| rs80151341  | 10 | 103,139,960 | <i>BTRC</i>   | 0.25 | $2.72 \times 10^{-8}$ |
| rs76838593  | 10 | 103,143,264 | <i>BTRC</i>   | 0.25 | $2.72 \times 10^{-8}$ |
| rs117932321 | 10 | 103,149,531 | <i>BTRC</i>   | 0.25 | $2.72 \times 10^{-8}$ |
| rs17760784  | 10 | 103,156,416 | <i>BTRC</i>   | 0.25 | $2.72 \times 10^{-8}$ |
| rs77334916  | 10 | 103,178,507 | <i>BTRC</i>   | 0.25 | $2.72 \times 10^{-8}$ |
| rs78810836  | 10 | 103,178,514 | <i>BTRC</i>   | 0.25 | $2.72 \times 10^{-8}$ |
| rs149161195 | 10 | 103,181,917 | <i>BTRC</i>   | 0.25 | $2.72 \times 10^{-8}$ |
| rs117998275 | 10 | 103,183,891 | <i>BTRC</i>   | 0.25 | $2.72 \times 10^{-8}$ |
| rs7900797   | 10 | 103,192,220 | <i>BTRC</i>   | 0.25 | $2.72 \times 10^{-8}$ |
| rs7098584   | 10 | 103,209,336 | <i>BTRC</i>   | 0.25 | $2.72 \times 10^{-8}$ |
| rs79528180  | 10 | 103,218,179 | <i>BTRC</i>   | 0.25 | $2.72 \times 10^{-8}$ |
| rs76114299  | 10 | 103,219,315 | <i>BTRC</i>   | 0.25 | $2.72 \times 10^{-8}$ |
| rs4387286   | 10 | 103,220,793 | <i>BTRC</i>   | 0.25 | $2.72 \times 10^{-8}$ |
| rs148303736 | 10 | 103,230,149 | <i>BTRC</i>   | 0.26 | $2.09 \times 10^{-8}$ |
| rs76807333  | 10 | 103,234,534 | <i>BTRC</i>   | 0.25 | $2.72 \times 10^{-8}$ |
| rs74415794  | 10 | 103,238,858 | <i>BTRC</i>   | 0.25 | $2.72 \times 10^{-8}$ |
| rs75820490  | 10 | 103,253,308 | <i>BTRC</i>   | 0.25 | $2.72 \times 10^{-8}$ |
| rs77012276  | 10 | 103,256,869 | <i>BTRC</i>   | 0.25 | $2.72 \times 10^{-8}$ |
| rs116952915 | 10 | 103,265,796 | <i>BTRC</i>   | 0.25 | $2.72 \times 10^{-8}$ |
| rs17767748  | 10 | 103,285,900 | <i>BTRC</i>   | 0.25 | $2.72 \times 10^{-8}$ |
| rs75919232  | 10 | 103,289,312 | <i>BTRC</i>   | 0.25 | $2.72 \times 10^{-8}$ |
| rs7073902   | 10 | 103,291,893 | <i>BTRC</i>   | 0.25 | $2.72 \times 10^{-8}$ |
| rs77209663  | 10 | 103,300,166 | <i>BTRC</i>   | 0.25 | $2.72 \times 10^{-8}$ |
| rs79010936  | 10 | 103,300,909 | <i>BTRC</i>   | 0.25 | $1.93 \times 10^{-8}$ |
| rs77325250  | 10 | 103,320,638 | Intergenic    | 0.25 | $2.72 \times 10^{-8}$ |
| rs77564076  | 10 | 103,320,818 | Intergenic    | 0.25 | $2.72 \times 10^{-8}$ |
| rs79692612  | 10 | 103,322,878 | Intergenic    | 0.25 | $2.72 \times 10^{-8}$ |
| rs114076639 | 10 | 103,333,323 | Intergenic    | 0.24 | $3.83 \times 10^{-8}$ |
| rs3730478   | 10 | 103,339,142 | <i>POLL</i>   | 0.24 | $3.83 \times 10^{-8}$ |

|             |    |             |                |      |                        |
|-------------|----|-------------|----------------|------|------------------------|
| rs3730463   | 10 | 103,344,589 | <i>POLL</i>    | 0.24 | $3.83 \times 10^{-8}$  |
| rs117416511 | 10 | 103,351,588 | <i>DPCD</i>    | 0.24 | $3.83 \times 10^{-8}$  |
| rs116357148 | 10 | 103,352,082 | <i>DPCD</i>    | 0.24 | $3.83 \times 10^{-8}$  |
| rs190065357 | 10 | 134,951,797 | Intergenic     | 0.37 | $1.68 \times 10^{-10}$ |
| rs192694504 | 11 | 2,215,419   | Intergenic     | 0.36 | $2.67 \times 10^{-9}$  |
| rs57499191  | 11 | 42,983,878  | Intergenic     | 0.38 | $5.13 \times 10^{-11}$ |
| rs61904091  | 11 | 95,383,824  | Intergenic     | 0.25 | $1.00 \times 10^{-8}$  |
| rs17799724  | 11 | 95,387,178  | Intergenic     | 0.25 | $2.27 \times 10^{-8}$  |
| rs1941401   | 11 | 114,173,810 | <i>NNMT</i>    | 0.30 | $2.80 \times 10^{-8}$  |
| rs1941400   | 11 | 114,173,835 | <i>NNMT</i>    | 0.30 | $2.80 \times 10^{-8}$  |
| rs11214940  | 11 | 114,182,670 | <i>NNMT</i>    | 0.30 | $2.80 \times 10^{-8}$  |
| rs76634920  | 11 | 114,184,587 | Intergenic     | 0.30 | $2.80 \times 10^{-8}$  |
| rs11611293  | 12 | 13,113,491  | Intergenic     | 0.25 | $3.68 \times 10^{-8}$  |
| rs67897587  | 12 | 13,293,153  | Intergenic     | 0.43 | $1.72 \times 10^{-13}$ |
| rs76519925  | 12 | 83,937,790  | Intergenic     | 0.29 | $2.41 \times 10^{-8}$  |
| rs35480839  | 12 | 85,297,523  | <i>SLC6A15</i> | 0.35 | $2.42 \times 10^{-9}$  |
| rs12823911  | 12 | 85,320,802  | Intergenic     | 0.34 | $2.94 \times 10^{-9}$  |
| rs1703078   | 12 | 89,018,883  | Intergenic     | 0.33 | $6.70 \times 10^{-9}$  |
| rs12372274  | 12 | 89,049,195  | Intergenic     | 0.31 | $4.43 \times 10^{-8}$  |
| rs7960533   | 12 | 114,087,473 | Intergenic     | 0.31 | $3.58 \times 10^{-8}$  |
| rs16942976  | 12 | 114,088,724 | Intergenic     | 0.31 | $3.58 \times 10^{-8}$  |
| rs12312601  | 12 | 114,088,737 | Intergenic     | 0.31 | $3.58 \times 10^{-8}$  |
| rs12314110  | 12 | 114,088,797 | Intergenic     | 0.31 | $3.58 \times 10^{-8}$  |
| rs28659869  | 12 | 114,089,625 | Intergenic     | 0.31 | $3.58 \times 10^{-8}$  |
| rs35188057  | 12 | 114,092,777 | Intergenic     | 0.31 | $3.58 \times 10^{-8}$  |
| rs192947014 | 12 | 121,365,216 | Intergenic     | 0.31 | $4.55 \times 10^{-9}$  |
| rs10507309  | 13 | 22,996,106  | Intergenic     | 0.29 | $4.56 \times 10^{-8}$  |
| rs117463805 | 13 | 50,803,819  | <i>DLEU1</i>   | 0.31 | $1.11 \times 10^{-8}$  |
| rs72658018  | 13 | 113,230,049 | <i>TUBGCP3</i> | 0.32 | $3.81 \times 10^{-8}$  |
| rs116205966 | 14 | 37,034,979  | Intergenic     | 0.29 | $3.50 \times 10^{-8}$  |
| rs77290882  | 14 | 37,035,012  | Intergenic     | 0.29 | $3.50 \times 10^{-8}$  |
| rs80232634  | 14 | 37,038,801  | Intergenic     | 0.29 | $3.50 \times 10^{-8}$  |
| rs79658468  | 14 | 37,039,439  | Intergenic     | 0.29 | $3.50 \times 10^{-8}$  |
| rs3809435   | 14 | 37,052,632  | Intergenic     | 0.29 | $3.50 \times 10^{-8}$  |
| rs3809438   | 14 | 37,053,331  | Intergenic     | 0.29 | $3.50 \times 10^{-8}$  |
| rs3809439   | 14 | 37,053,602  | Intergenic     | 0.29 | $3.50 \times 10^{-8}$  |
| rs17104784  | 14 | 37,059,309  | Intergenic     | 0.29 | $3.50 \times 10^{-8}$  |
| rs75413287  | 14 | 37,072,002  | Intergenic     | 0.29 | $3.35 \times 10^{-8}$  |
| rs149692925 | 14 | 37,072,933  | Intergenic     | 0.29 | $3.35 \times 10^{-8}$  |
| rs79009436  | 14 | 37,073,674  | Intergenic     | 0.29 | $3.35 \times 10^{-8}$  |
| rs74610566  | 14 | 37,075,302  | Intergenic     | 0.30 | $2.21 \times 10^{-8}$  |
| rs75729501  | 14 | 37,078,409  | Intergenic     | 0.30 | $2.21 \times 10^{-8}$  |
| rs117276383 | 14 | 37,079,764  | Intergenic     | 0.30 | $2.21 \times 10^{-8}$  |
| rs117704811 | 14 | 37,084,482  | Intergenic     | 0.30 | $2.08 \times 10^{-8}$  |
| rs118083282 | 14 | 37,084,791  | Intergenic     | 0.30 | $2.21 \times 10^{-8}$  |
| rs79056984  | 14 | 37,085,147  | Intergenic     | 0.30 | $2.21 \times 10^{-8}$  |
| rs78936886  | 14 | 37,085,442  | Intergenic     | 0.30 | $2.21 \times 10^{-8}$  |
| rs75327183  | 15 | 56,814,218  | Intergenic     | 0.33 | $2.98 \times 10^{-8}$  |
| rs58074387  | 15 | 74,191,225  | Intergenic     | 0.31 | $4.46 \times 10^{-8}$  |

|              |             |    |             |                                   |       |                        |
|--------------|-------------|----|-------------|-----------------------------------|-------|------------------------|
|              | rs3987678   | 16 | 28,652,709  | Intergenic                        | 0.31  | $1.53 \times 10^{-8}$  |
|              | rs72798056  | 16 | 50,184,574  | Intergenic                        | 0.30  | $3.37 \times 10^{-8}$  |
|              | rs17281013  | 16 | 56,320,435  | <i>GNAO1</i>                      | 0.29  | $2.64 \times 10^{-8}$  |
|              | rs8043572   | 16 | 56,323,232  | <i>GNAO1</i>                      | 0.29  | $2.64 \times 10^{-8}$  |
|              | rs192073405 | 17 | 69,639,501  | Intergenic                        | 0.41  | $4.59 \times 10^{-13}$ |
|              | rs143620169 | 17 | 73,224,653  | <i>NUP85</i>                      | 0.35  | $1.24 \times 10^{-9}$  |
|              | rs79858696  | 17 | 73,233,599  | <i>GGA3</i>                       | 0.35  | $9.28 \times 10^{-10}$ |
|              | rs149164    | 20 | 12,894,601  | <i>LOC101929486</i>               | 0.32  | $3.46 \times 10^{-8}$  |
|              | rs636066    | 20 | 12,903,104  | <i>LOC101929486</i>               | 0.32  | $3.46 \times 10^{-8}$  |
|              | rs181717    | 20 | 12,917,095  | <i>LOC101929486; LOC102606466</i> | 0.32  | $3.37 \times 10^{-8}$  |
|              | rs56302497  | 20 | 53,086,256  | Intergenic                        | 0.30  | $2.36 \times 10^{-8}$  |
|              | rs68091706  | 20 | 53,087,669  | Intergenic                        | 0.29  | $3.40 \times 10^{-8}$  |
|              | rs6023266   | 20 | 53,088,542  | Intergenic                        | 0.29  | $3.40 \times 10^{-8}$  |
|              | rs186046502 | 20 | 60,898,308  | <i>LAMA5</i>                      | 0.31  | $2.14 \times 10^{-8}$  |
|              | rs112629906 | 20 | 61,199,642  | Intergenic                        | 0.37  | $1.49 \times 10^{-10}$ |
|              | rs112886784 | 20 | 61,206,397  | Intergenic                        | 0.33  | $2.94 \times 10^{-9}$  |
|              | rs117388418 | 20 | 61,279,131  | <i>SLCO4A1</i>                    | 0.34  | $5.54 \times 10^{-11}$ |
|              | rs34419428  | 20 | 61,288,015  | <i>SLCO4A1</i>                    | 0.39  | $5.17 \times 10^{-12}$ |
|              | rs75000682  | 21 | 42,662,479  | Intergenic                        | 0.35  | $2.85 \times 10^{-9}$  |
|              | rs75896199  | 21 | 42,678,194  | Intergenic                        | 0.34  | $4.38 \times 10^{-9}$  |
|              | rs57347504  | 21 | 42,678,481  | Intergenic                        | 0.34  | $4.38 \times 10^{-9}$  |
|              | rs112075738 | 21 | 42,680,958  | Intergenic                        | 0.34  | $4.38 \times 10^{-9}$  |
|              | rs11910683  | 21 | 42,690,922  | <i>FAM3B</i>                      | 0.34  | $4.38 \times 10^{-9}$  |
|              | rs2838011   | 21 | 42,694,667  | <i>FAM3B</i>                      | 0.33  | $8.39 \times 10^{-9}$  |
|              | rs2838013   | 21 | 42,695,161  | <i>FAM3B</i>                      | 0.33  | $8.39 \times 10^{-9}$  |
|              | rs6517664   | 21 | 42,704,983  | <i>FAM3B</i>                      | 0.32  | $2.39 \times 10^{-8}$  |
|              | rs8129297   | 21 | 42,709,596  | <i>FAM3B</i>                      | 0.33  | $8.39 \times 10^{-9}$  |
|              | rs28478237  | 21 | 42,712,315  | <i>FAM3B</i>                      | 0.35  | $2.00 \times 10^{-10}$ |
|              | rs28476518  | 21 | 42,712,517  | <i>FAM3B</i>                      | 0.35  | $2.00 \times 10^{-10}$ |
|              | rs28451078  | 21 | 42,712,519  | <i>FAM3B</i>                      | 0.35  | $2.00 \times 10^{-10}$ |
|              | rs75055531  | 21 | 42,712,996  | <i>FAM3B</i>                      | 0.35  | $2.00 \times 10^{-10}$ |
|              | rs77974492  | 21 | 42,713,863  | <i>FAM3B</i>                      | 0.35  | $2.00 \times 10^{-10}$ |
|              | rs28478227  | 21 | 42,714,108  | <i>FAM3B</i>                      | 0.34  | $2.90 \times 10^{-10}$ |
|              | rs112716132 | 22 | 27,463,211  | Intergenic                        | 0.32  | $1.24 \times 10^{-8}$  |
|              | rs6006621   | 22 | 44,419,407  | <i>PARVB</i>                      | 0.33  | $1.52 \times 10^{-8}$  |
| <i>ITGA6</i> | rs3127819   | 10 | 46,999,019  | <i>GPRIN2</i>                     | -0.92 | $1.92 \times 10^{-9}$  |
|              | rs3127682   | 10 | 46,999,465  | <i>GPRIN2</i>                     | -0.92 | $1.92 \times 10^{-9}$  |
|              | rs3127821   | 10 | 46,999,747  | <i>GPRIN2</i>                     | -0.92 | $1.92 \times 10^{-9}$  |
|              | rs3127823   | 10 | 47,000,079  | <i>GPRIN2</i>                     | -0.92 | $1.92 \times 10^{-9}$  |
|              | rs7912299   | 10 | 47,000,239  | <i>GPRIN2</i>                     | -0.92 | $1.92 \times 10^{-9}$  |
| <i>ITGAV</i> | rs35073780  | 1  | 117,411,009 | Intergenic                        | 1.21  | $1.55 \times 10^{-8}$  |
|              | rs6544949   | 2  | 23,787,723  | <i>KLHL29</i>                     | 1.61  | $7.90 \times 10^{-9}$  |
|              | rs72849620  | 2  | 23,788,815  | <i>KLHL29</i>                     | 1.61  | $7.90 \times 10^{-9}$  |
|              | rs72849625  | 2  | 23,791,785  | <i>KLHL29</i>                     | 1.61  | $7.90 \times 10^{-9}$  |
|              | rs72849631  | 2  | 23,793,448  | <i>KLHL29</i>                     | 1.61  | $7.90 \times 10^{-9}$  |
|              | rs76903023  | 2  | 85,615,750  | <i>ELMOD3</i>                     | 1.62  | $2.24 \times 10^{-8}$  |
|              | rs72646053  | 4  | 59,214,206  | Intergenic                        | 1.63  | $2.72 \times 10^{-8}$  |
|              | rs142312273 | 7  | 69,689,322  | <i>AUTS2</i>                      | 1.58  | $4.06 \times 10^{-8}$  |
|              | rs75454689  | 8  | 33,827,581  | Intergenic                        | 1.56  | $1.70 \times 10^{-9}$  |

|              |             |    |             |                       |      |                        |
|--------------|-------------|----|-------------|-----------------------|------|------------------------|
|              | rs113896449 | 8  | 112,372,300 | Intergenic            | 1.12 | $2.84 \times 10^{-9}$  |
|              | rs73709198  | 8  | 119,754,591 | Intergenic            | 1.61 | $1.45 \times 10^{-8}$  |
|              | rs77178878  | 9  | 138,197,316 | Intergenic            | 1.29 | $4.12 \times 10^{-8}$  |
|              | rs12360054  | 10 | 10,510,697  | Intergenic            | 1.61 | $4.65 \times 10^{-9}$  |
|              | rs11013721  | 10 | 24,099,710  | <i>KIAA1217</i>       | 1.58 | $9.61 \times 10^{-9}$  |
|              | rs61878765  | 11 | 44,624,149  | <i>CD82</i>           | 1.56 | $3.77 \times 10^{-8}$  |
|              | rs7980462   | 12 | 56,535,326  | <i>ESYT1</i>          | 1.38 | $2.72 \times 10^{-8}$  |
|              | rs9541625   | 13 | 69,490,725  | Intergenic            | 1.71 | $8.72 \times 10^{-9}$  |
|              | rs17621546  | 17 | 35,407,828  | <i>AATF</i>           | 1.41 | $7.61 \times 10^{-9}$  |
|              | rs2187048   | 18 | 35,033,025  | <i>CELF4</i>          | 1.23 | $1.79 \times 10^{-8}$  |
|              | rs7236596   | 18 | 35,033,611  | <i>CELF4</i>          | 1.23 | $1.79 \times 10^{-8}$  |
| <i>ITGB5</i> | rs74807395  | 1  | 72,243,867  | <i>NEGR1</i>          | 1.65 | $4.35 \times 10^{-8}$  |
|              | rs55705629  | 1  | 81,822,629  | Intergenic            | 1.15 | $4.26 \times 10^{-8}$  |
|              | rs12756555  | 1  | 81,827,251  | Intergenic            | 1.42 | $3.72 \times 10^{-10}$ |
|              | rs61768907  | 1  | 81,841,624  | Intergenic            | 1.13 | $4.68 \times 10^{-8}$  |
|              | rs55938551  | 2  | 242,033,593 | <i>MTERFD2; SNED1</i> | 1.63 | $3.21 \times 10^{-8}$  |
|              | rs59495246  | 3  | 112,050,638 | Intergenic            | 1.66 | $3.39 \times 10^{-9}$  |
|              | rs61651681  | 3  | 112,050,646 | Intergenic            | 1.66 | $3.39 \times 10^{-9}$  |
|              | rs73856005  | 3  | 112,052,833 | <i>CD200</i>          | 1.70 | $5.06 \times 10^{-9}$  |
|              | rs16859476  | 3  | 112,060,256 | <i>CD200</i>          | 1.65 | $1.00 \times 10^{-8}$  |
|              | rs12106675  | 3  | 112,061,773 | <i>CD200</i>          | 1.65 | $1.00 \times 10^{-8}$  |
|              | rs4575866   | 3  | 112,062,307 | <i>CD200</i>          | 1.65 | $1.00 \times 10^{-8}$  |
|              | rs4582023   | 3  | 112,062,449 | <i>CD200</i>          | 1.65 | $1.00 \times 10^{-8}$  |
|              | rs16859484  | 3  | 112,063,485 | <i>CD200</i>          | 1.65 | $1.00 \times 10^{-8}$  |
|              | rs3817425   | 3  | 112,063,705 | <i>CD200</i>          | 1.65 | $1.00 \times 10^{-8}$  |
|              | rs11921546  | 3  | 112,064,263 | <i>CD200</i>          | 1.65 | $1.00 \times 10^{-8}$  |
|              | rs60497880  | 3  | 112,064,266 | <i>CD200</i>          | 1.65 | $1.00 \times 10^{-8}$  |
|              | rs60673403  | 3  | 112,064,830 | <i>CD200</i>          | 1.65 | $1.00 \times 10^{-8}$  |
|              | rs59863561  | 3  | 112,064,879 | <i>CD200</i>          | 1.62 | $1.59 \times 10^{-8}$  |
|              | rs1050572   | 3  | 112,066,562 | <i>CD200</i>          | 1.65 | $1.00 \times 10^{-8}$  |
|              | rs2399417   | 3  | 112,067,241 | <i>CD200</i>          | 1.62 | $1.17 \times 10^{-8}$  |
|              | rs2399418   | 3  | 112,067,438 | <i>CD200</i>          | 1.65 | $1.00 \times 10^{-8}$  |
|              | rs59981538  | 3  | 112,068,064 | <i>CD200</i>          | 1.65 | $1.00 \times 10^{-8}$  |
|              | rs60377655  | 3  | 112,068,440 | <i>CD200</i>          | 1.65 | $1.00 \times 10^{-8}$  |
|              | rs57404826  | 3  | 112,068,517 | <i>CD200</i>          | 1.65 | $1.00 \times 10^{-8}$  |
|              | rs113182723 | 3  | 179,242,704 | Intergenic            | 1.94 | $1.98 \times 10^{-9}$  |
|              | rs150745577 | 3  | 179,242,808 | Intergenic            | 1.94 | $1.98 \times 10^{-9}$  |
|              | rs4687412   | 3  | 193,079,117 | <i>ATP13A5</i>        | 1.84 | $6.58 \times 10^{-9}$  |
|              | rs1521275   | 3  | 193,079,424 | <i>ATP13A5</i>        | 1.84 | $6.58 \times 10^{-9}$  |
|              | rs4234629   | 3  | 193,081,516 | <i>ATP13A5</i>        | 1.84 | $6.58 \times 10^{-9}$  |
|              | rs4234630   | 3  | 193,081,748 | <i>ATP13A5</i>        | 1.84 | $6.58 \times 10^{-9}$  |
|              | rs923496    | 3  | 193,081,830 | <i>ATP13A5</i>        | 1.84 | $6.58 \times 10^{-9}$  |
|              | rs2037427   | 3  | 193,082,557 | <i>ATP13A5</i>        | 1.84 | $6.58 \times 10^{-9}$  |
|              | rs1489929   | 3  | 193,083,021 | <i>ATP13A5</i>        | 1.84 | $6.58 \times 10^{-9}$  |
|              | rs1489928   | 3  | 193,083,140 | <i>ATP13A5</i>        | 1.84 | $6.58 \times 10^{-9}$  |
|              | rs1813604   | 3  | 193,083,891 | <i>ATP13A5</i>        | 1.84 | $6.58 \times 10^{-9}$  |
|              | rs1352631   | 3  | 193,084,066 | <i>ATP13A5</i>        | 1.84 | $6.58 \times 10^{-9}$  |
|              | rs1352629   | 3  | 193,084,295 | <i>ATP13A5</i>        | 1.84 | $6.58 \times 10^{-9}$  |
|              | rs6778209   | 3  | 193,084,914 | <i>ATP13A5</i>        | 1.84 | $6.58 \times 10^{-9}$  |

|             |    |             |                 |      |                        |
|-------------|----|-------------|-----------------|------|------------------------|
| rs6778217   | 3  | 193,084,920 | <i>ATP13A5</i>  | 1.84 | $6.58 \times 10^{-9}$  |
| rs7638331   | 3  | 193,086,512 | <i>ATP13A5</i>  | 1.81 | $9.04 \times 10^{-9}$  |
| rs2220523   | 3  | 193,087,044 | <i>ATP13A5</i>  | 1.77 | $1.01 \times 10^{-8}$  |
| rs9873417   | 3  | 193,087,357 | <i>ATP13A5</i>  | 1.84 | $6.58 \times 10^{-9}$  |
| rs1387706   | 3  | 193,087,860 | <i>ATP13A5</i>  | 1.84 | $6.58 \times 10^{-9}$  |
| rs1851217   | 3  | 193,088,011 | <i>ATP13A5</i>  | 1.84 | $6.58 \times 10^{-9}$  |
| rs1387708   | 3  | 193,088,442 | <i>ATP13A5</i>  | 1.84 | $6.58 \times 10^{-9}$  |
| rs1387707   | 3  | 193,088,509 | <i>ATP13A5</i>  | 1.84 | $6.58 \times 10^{-9}$  |
| rs4687413   | 3  | 193,088,870 | <i>ATP13A5</i>  | 1.84 | $6.58 \times 10^{-9}$  |
| rs1489939   | 3  | 193,089,281 | <i>ATP13A5</i>  | 1.84 | $6.58 \times 10^{-9}$  |
| rs1489937   | 3  | 193,089,495 | <i>ATP13A5</i>  | 1.84 | $6.58 \times 10^{-9}$  |
| rs4687414   | 3  | 193,089,580 | <i>ATP13A5</i>  | 1.84 | $6.58 \times 10^{-9}$  |
| rs2171848   | 3  | 193,090,255 | <i>ATP13A5</i>  | 1.84 | $6.58 \times 10^{-9}$  |
| rs6444712   | 3  | 193,090,260 | <i>ATP13A5</i>  | 1.84 | $6.58 \times 10^{-9}$  |
| rs1565354   | 3  | 193,090,398 | <i>ATP13A5</i>  | 1.84 | $6.58 \times 10^{-9}$  |
| rs1565353   | 3  | 193,090,633 | <i>ATP13A5</i>  | 1.84 | $6.58 \times 10^{-9}$  |
| rs7621312   | 3  | 193,090,834 | <i>ATP13A5</i>  | 1.84 | $6.58 \times 10^{-9}$  |
| rs7621397   | 3  | 193,090,858 | <i>ATP13A5</i>  | 1.84 | $6.58 \times 10^{-9}$  |
| rs4687416   | 3  | 193,091,558 | <i>ATP13A5</i>  | 1.84 | $6.58 \times 10^{-9}$  |
| rs9844823   | 3  | 193,092,603 | <i>ATP13A5</i>  | 1.84 | $6.58 \times 10^{-9}$  |
| rs1602189   | 3  | 193,092,922 | <i>ATP13A5</i>  | 1.84 | $6.58 \times 10^{-9}$  |
| rs1915571   | 3  | 193,093,271 | <i>ATP13A5</i>  | 1.84 | $6.58 \times 10^{-9}$  |
| rs4687417   | 3  | 193,094,381 | <i>ATP13A5</i>  | 1.70 | $3.16 \times 10^{-8}$  |
| rs4686634   | 3  | 193,094,411 | <i>ATP13A5</i>  | 1.84 | $6.58 \times 10^{-9}$  |
| rs1489935   | 3  | 193,096,077 | <i>ATP13A5</i>  | 1.79 | $1.18 \times 10^{-8}$  |
| rs4687420   | 3  | 193,098,050 | Intergenic      | 1.79 | $1.18 \times 10^{-8}$  |
| rs4687421   | 3  | 193,098,217 | Intergenic      | 1.79 | $1.26 \times 10^{-8}$  |
| rs6444713   | 3  | 193,098,911 | Intergenic      | 1.74 | $2.22 \times 10^{-8}$  |
| rs6444714   | 3  | 193,100,563 | Intergenic      | 1.79 | $1.26 \times 10^{-8}$  |
| rs16879739  | 6  | 17,456,735  | <i>CAP2</i>     | 1.93 | $1.78 \times 10^{-8}$  |
| rs139141718 | 6  | 20,874,637  | <i>CDKALI</i>   | 2.01 | $8.11 \times 10^{-9}$  |
| rs78104904  | 9  | 111,991,227 | <i>EPB41LAB</i> | 1.82 | $3.98 \times 10^{-8}$  |
| rs61606572  | 11 | 3,855,142   | <i>RHOG</i>     | 1.59 | $3.45 \times 10^{-8}$  |
| rs148149865 | 11 | 58,488,436  | <i>GLYAT</i>    | 2.11 | $1.25 \times 10^{-9}$  |
| rs1333541   | 13 | 71,291,081  | Intergenic      | 1.61 | $4.82 \times 10^{-9}$  |
| rs2792213   | 14 | 65,771,339  | Intergenic      | 2.03 | $2.19 \times 10^{-8}$  |
| rs117147549 | 14 | 65,912,463  | <i>FUT8</i>     | 1.89 | $1.36 \times 10^{-8}$  |
| rs10146602  | 14 | 89,693,105  | <i>FOXN3</i>    | 1.90 | $3.52 \times 10^{-8}$  |
| rs11624027  | 14 | 89,694,080  | <i>FOXN3</i>    | 1.90 | $3.52 \times 10^{-8}$  |
| rs185036609 | 14 | 106,471,245 | Intergenic      | 2.27 | $1.08 \times 10^{-14}$ |
| rs190814253 | 14 | 106,471,253 | Intergenic      | 2.18 | $5.41 \times 10^{-14}$ |
| rs141136074 | 14 | 106,471,280 | Intergenic      | 2.18 | $5.41 \times 10^{-14}$ |
| rs116043222 | 14 | 106,600,403 | Intergenic      | 1.89 | $9.22 \times 10^{-9}$  |
| rs115327084 | 14 | 106,600,426 | Intergenic      | 2.14 | $5.50 \times 10^{-10}$ |
| rs35607576  | 14 | 106,871,303 | Intergenic      | 1.75 | $1.59 \times 10^{-8}$  |
| rs74901541  | 15 | 71,514,019  | <i>THSD4</i>    | 1.79 | $4.85 \times 10^{-9}$  |
| rs28700084  | 15 | 71,514,666  | <i>THSD4</i>    | 1.79 | $4.85 \times 10^{-9}$  |
| rs28674550  | 15 | 71,526,871  | <i>THSD4</i>    | 1.85 | $4.56 \times 10^{-9}$  |
| rs28578042  | 15 | 71,527,010  | <i>THSD4</i>    | 1.85 | $4.56 \times 10^{-9}$  |



|              |             |    |             |               |      |                        |
|--------------|-------------|----|-------------|---------------|------|------------------------|
|              | rs16955314  | 15 | 71,527,133  | <i>THSD4</i>  | 1.85 | $4.56 \times 10^{-9}$  |
|              | rs181977918 | 18 | 75,133,321  | Intergenic    | 1.79 | $1.76 \times 10^{-8}$  |
|              | rs74891480  | 19 | 20,660,656  | Intergenic    | 1.86 | $1.16 \times 10^{-9}$  |
|              | rs117782107 | 20 | 13,117,956  | <i>SPTLC3</i> | 1.88 | $2.73 \times 10^{-9}$  |
| <i>KITLG</i> | rs74436626  | 1  | 20,459,647  | Intergenic    | 0.15 | $1.14 \times 10^{-8}$  |
|              | rs11581920  | 1  | 113,508,066 | Intergenic    | 0.16 | $2.05 \times 10^{-8}$  |
|              | rs3753428   | 1  | 147,010,018 | Intergenic    | 0.17 | $1.05 \times 10^{-9}$  |
|              | rs28633140  | 1  | 147,015,933 | <i>BCL9</i>   | 0.16 | $5.91 \times 10^{-10}$ |
|              | rs11240077  | 1  | 147,016,448 | <i>BCL9</i>   | 0.17 | $2.50 \times 10^{-10}$ |
|              | rs10494252  | 1  | 147,016,936 | <i>BCL9</i>   | 0.17 | $2.50 \times 10^{-10}$ |
|              | rs138996047 | 1  | 147,018,018 | <i>BCL9</i>   | 0.16 | $7.22 \times 10^{-10}$ |
|              | rs1027423   | 1  | 147,018,529 | <i>BCL9</i>   | 0.17 | $1.33 \times 10^{-10}$ |
|              | rs12076319  | 1  | 147,018,782 | <i>BCL9</i>   | 0.17 | $1.33 \times 10^{-10}$ |
|              | rs17160408  | 1  | 147,020,638 | <i>BCL9</i>   | 0.17 | $1.33 \times 10^{-10}$ |
|              | rs12081028  | 1  | 147,022,697 | <i>BCL9</i>   | 0.17 | $1.33 \times 10^{-10}$ |
|              | rs10494251  | 1  | 147,023,894 | <i>BCL9</i>   | 0.17 | $1.33 \times 10^{-10}$ |
|              | rs10494250  | 1  | 147,024,047 | <i>BCL9</i>   | 0.17 | $1.33 \times 10^{-10}$ |
|              | rs76170364  | 1  | 147,039,994 | <i>BCL9</i>   | 0.17 | $1.33 \times 10^{-10}$ |
|              | rs17160461  | 1  | 147,049,876 | <i>BCL9</i>   | 0.17 | $2.09 \times 10^{-10}$ |
|              | rs78653484  | 1  | 147,183,927 | Intergenic    | 0.15 | $8.16 \times 10^{-9}$  |
|              | rs16848623  | 1  | 201,426,353 | Intergenic    | 0.14 | $7.51 \times 10^{-9}$  |
|              | rs144854914 | 1  | 211,072,012 | <i>KCNHI</i>  | 0.15 | $1.45 \times 10^{-8}$  |
|              | rs73125648  | 1  | 244,224,801 | Intergenic    | 0.17 | $1.87 \times 10^{-9}$  |
|              | rs112097301 | 2  | 31,923,217  | Intergenic    | 0.13 | $2.55 \times 10^{-8}$  |
|              | rs7573162   | 2  | 31,958,666  | Intergenic    | 0.12 | $1.55 \times 10^{-8}$  |
|              | rs75782206  | 2  | 36,157,474  | Intergenic    | 0.16 | $6.85 \times 10^{-9}$  |
|              | rs77147626  | 2  | 36,158,212  | Intergenic    | 0.16 | $6.85 \times 10^{-9}$  |
|              | rs79879987  | 2  | 36,160,879  | Intergenic    | 0.16 | $6.85 \times 10^{-9}$  |
|              | rs76460982  | 2  | 36,164,286  | Intergenic    | 0.15 | $1.15 \times 10^{-8}$  |
|              | rs79777103  | 2  | 36,164,694  | Intergenic    | 0.16 | $6.85 \times 10^{-9}$  |
|              | rs75971787  | 2  | 36,164,696  | Intergenic    | 0.16 | $6.85 \times 10^{-9}$  |
|              | rs114687343 | 2  | 36,165,218  | Intergenic    | 0.16 | $6.85 \times 10^{-9}$  |
|              | rs17017873  | 2  | 36,166,844  | Intergenic    | 0.16 | $6.85 \times 10^{-9}$  |
|              | rs74319278  | 2  | 36,167,584  | Intergenic    | 0.16 | $6.85 \times 10^{-9}$  |
|              | rs79170974  | 2  | 36,169,513  | Intergenic    | 0.16 | $6.85 \times 10^{-9}$  |
|              | rs76432971  | 2  | 36,170,064  | Intergenic    | 0.16 | $6.85 \times 10^{-9}$  |
|              | rs17017878  | 2  | 36,171,216  | Intergenic    | 0.16 | $6.85 \times 10^{-9}$  |
|              | rs80230366  | 2  | 36,172,457  | Intergenic    | 0.16 | $6.85 \times 10^{-9}$  |
|              | rs17017881  | 2  | 36,173,043  | Intergenic    | 0.16 | $6.85 \times 10^{-9}$  |
|              | rs17017884  | 2  | 36,173,089  | Intergenic    | 0.16 | $6.85 \times 10^{-9}$  |
|              | rs17017886  | 2  | 36,173,264  | Intergenic    | 0.16 | $6.85 \times 10^{-9}$  |
|              | rs17017891  | 2  | 36,174,296  | Intergenic    | 0.16 | $6.85 \times 10^{-9}$  |
|              | rs17017892  | 2  | 36,174,910  | Intergenic    | 0.16 | $6.85 \times 10^{-9}$  |
|              | rs78913475  | 2  | 36,175,055  | Intergenic    | 0.16 | $6.85 \times 10^{-9}$  |
|              | rs75521975  | 2  | 36,175,135  | Intergenic    | 0.16 | $6.85 \times 10^{-9}$  |
|              | rs114580394 | 2  | 36,175,146  | Intergenic    | 0.16 | $6.85 \times 10^{-9}$  |
|              | rs17017897  | 2  | 36,175,841  | Intergenic    | 0.16 | $6.85 \times 10^{-9}$  |
|              | rs75475237  | 2  | 36,176,113  | Intergenic    | 0.16 | $6.85 \times 10^{-9}$  |
|              | rs17017901  | 2  | 36,176,629  | Intergenic    | 0.16 | $6.85 \times 10^{-9}$  |

|             |   |             |                            |      |                        |
|-------------|---|-------------|----------------------------|------|------------------------|
| rs17017915  | 2 | 36,176,892  | Intergenic                 | 0.16 | $6.85 \times 10^{-9}$  |
| rs77156921  | 2 | 36,176,910  | Intergenic                 | 0.16 | $6.85 \times 10^{-9}$  |
| rs78912121  | 2 | 36,177,115  | Intergenic                 | 0.16 | $6.85 \times 10^{-9}$  |
| rs75749575  | 2 | 36,177,214  | Intergenic                 | 0.16 | $6.85 \times 10^{-9}$  |
| rs77250066  | 2 | 36,177,653  | Intergenic                 | 0.16 | $6.85 \times 10^{-9}$  |
| rs17838357  | 2 | 36,177,785  | Intergenic                 | 0.16 | $6.85 \times 10^{-9}$  |
| rs115733761 | 2 | 36,177,977  | Intergenic                 | 0.16 | $6.85 \times 10^{-9}$  |
| rs143729842 | 2 | 36,178,146  | Intergenic                 | 0.16 | $6.85 \times 10^{-9}$  |
| rs76855363  | 2 | 36,178,567  | Intergenic                 | 0.16 | $6.85 \times 10^{-9}$  |
| rs77734410  | 4 | 81,038,162  | Intergenic                 | 0.17 | $2.92 \times 10^{-9}$  |
| rs7683141   | 4 | 111,100,198 | <i>ELOVL6</i>              | 0.15 | $2.28 \times 10^{-8}$  |
| rs72672363  | 4 | 115,228,560 | Intergenic                 | 0.13 | $4.39 \times 10^{-8}$  |
| rs4835576   | 4 | 145,043,098 | <i>GYP A</i>               | 0.16 | $2.25 \times 10^{-8}$  |
| rs7696242   | 4 | 145,044,186 | <i>GYP A</i>               | 0.16 | $2.25 \times 10^{-8}$  |
| rs79882885  | 4 | 187,260,837 | <i>F11-AS1</i>             | 0.15 | $3.31 \times 10^{-8}$  |
| rs75171718  | 5 | 79,990,131  | <i>MSH3</i>                | 0.15 | $1.19 \times 10^{-9}$  |
| rs5003758   | 5 | 83,182,193  | Intergenic                 | 0.16 | $2.35 \times 10^{-9}$  |
| rs72791183  | 5 | 111,963,677 | Intergenic                 | 0.14 | $4.21 \times 10^{-8}$  |
| rs13160323  | 5 | 138,341,236 | <i>SIL1</i>                | 0.15 | $1.26 \times 10^{-8}$  |
| rs149810160 | 5 | 147,918,965 | <i>HTR4</i>                | 0.14 | $3.93 \times 10^{-8}$  |
| rs34182166  | 5 | 150,582,494 | <i>CCDC69</i>              | 0.15 | $1.99 \times 10^{-8}$  |
| rs3756644   | 5 | 153,780,979 | <i>GALNT10; SAP30L-AS1</i> | 0.14 | $4.07 \times 10^{-8}$  |
| rs74530243  | 5 | 157,594,148 | Intergenic                 | 0.15 | $1.72 \times 10^{-9}$  |
| rs927465    | 5 | 157,596,056 | Intergenic                 | 0.15 | $1.72 \times 10^{-9}$  |
| rs17242549  | 5 | 157,597,476 | Intergenic                 | 0.15 | $1.72 \times 10^{-9}$  |
| rs11742423  | 5 | 157,598,895 | Intergenic                 | 0.15 | $1.72 \times 10^{-9}$  |
| rs11741492  | 5 | 157,606,532 | Intergenic                 | 0.15 | $1.72 \times 10^{-9}$  |
| rs56014022  | 5 | 157,610,571 | Intergenic                 | 0.15 | $1.72 \times 10^{-9}$  |
| rs147220874 | 5 | 157,611,807 | Intergenic                 | 0.15 | $4.71 \times 10^{-9}$  |
| rs11743966  | 5 | 157,614,481 | Intergenic                 | 0.15 | $1.72 \times 10^{-9}$  |
| rs11748189  | 5 | 157,614,896 | Intergenic                 | 0.15 | $1.72 \times 10^{-9}$  |
| rs72802571  | 5 | 157,615,035 | Intergenic                 | 0.15 | $1.72 \times 10^{-9}$  |
| rs4588578   | 5 | 157,615,637 | Intergenic                 | 0.15 | $1.72 \times 10^{-9}$  |
| rs1874161   | 5 | 157,615,710 | Intergenic                 | 0.15 | $1.72 \times 10^{-9}$  |
| rs1874160   | 5 | 157,616,148 | Intergenic                 | 0.15 | $1.72 \times 10^{-9}$  |
| rs12110218  | 5 | 157,617,896 | Intergenic                 | 0.15 | $1.72 \times 10^{-9}$  |
| rs12110224  | 5 | 157,618,221 | Intergenic                 | 0.15 | $1.72 \times 10^{-9}$  |
| rs10055637  | 5 | 157,618,288 | Intergenic                 | 0.15 | $1.72 \times 10^{-9}$  |
| rs11747817  | 5 | 157,618,680 | Intergenic                 | 0.15 | $1.72 \times 10^{-9}$  |
| rs115960274 | 5 | 164,005,709 | Intergenic                 | 0.16 | $2.89 \times 10^{-8}$  |
| rs72817570  | 5 | 164,584,901 | Intergenic                 | 0.14 | $3.26 \times 10^{-8}$  |
| rs72817572  | 5 | 164,585,655 | Intergenic                 | 0.14 | $3.26 \times 10^{-8}$  |
| rs34223351  | 5 | 164,586,498 | Intergenic                 | 0.14 | $3.26 \times 10^{-8}$  |
| rs34233411  | 5 | 164,586,654 | Intergenic                 | 0.14 | $3.26 \times 10^{-8}$  |
| rs8180513   | 5 | 168,749,112 | Intergenic                 | 0.15 | $1.64 \times 10^{-8}$  |
| rs2057064   | 6 | 41,632,020  | Intergenic                 | 0.15 | $1.18 \times 10^{-10}$ |
| rs13216349  | 6 | 75,151,471  | <i>LOC101928516</i>        | 0.13 | $3.96 \times 10^{-8}$  |
| rs2533450   | 7 | 69,086,665  | <i>AUTS2</i>               | 0.14 | $1.05 \times 10^{-8}$  |
| rs653929    | 7 | 69,187,050  | <i>AUTS2</i>               | 0.14 | $6.42 \times 10^{-9}$  |

|             |    |             |                         |      |                        |
|-------------|----|-------------|-------------------------|------|------------------------|
| rs802046    | 7  | 86,951,809  | Intergenic              | 0.15 | $1.25 \times 10^{-8}$  |
| rs112714763 | 7  | 86,969,315  | <i>TP53TG1</i>          | 0.15 | $2.63 \times 10^{-8}$  |
| rs112796991 | 7  | 86,983,328  | <i>CROT</i>             | 0.15 | $2.63 \times 10^{-8}$  |
| rs802024    | 7  | 86,985,719  | <i>CROT</i>             | 0.15 | $2.63 \times 10^{-8}$  |
| rs802025    | 7  | 86,986,632  | <i>CROT</i>             | 0.15 | $2.63 \times 10^{-8}$  |
| rs117766049 | 7  | 129,684,199 | <i>ZC3HC1</i>           | 0.15 | $1.23 \times 10^{-8}$  |
| rs117814185 | 7  | 130,532,260 | Intergenic              | 0.16 | $3.28 \times 10^{-9}$  |
| rs113314246 | 7  | 135,418,147 | <i>FAM180A</i>          | 0.14 | $5.28 \times 10^{-9}$  |
| rs75170699  | 7  | 135,425,191 | <i>FAM180A</i>          | 0.14 | $5.28 \times 10^{-9}$  |
| rs80096630  | 7  | 135,432,784 | <i>FAM180A</i>          | 0.14 | $3.28 \times 10^{-9}$  |
| rs112692348 | 7  | 135,434,483 | Intergenic              | 0.14 | $5.28 \times 10^{-9}$  |
| rs73169197  | 7  | 155,701,424 | Intergenic              | 0.15 | $1.56 \times 10^{-8}$  |
| rs78876270  | 8  | 8,724,296   | <i>MFHAS1</i>           | 0.13 | $4.01 \times 10^{-8}$  |
| rs6474703   | 9  | 12,336,801  | Intergenic              | 0.16 | $9.42 \times 10^{-10}$ |
| rs6474704   | 9  | 12,336,809  | Intergenic              | 0.15 | $2.32 \times 10^{-9}$  |
| rs76483310  | 9  | 18,804,514  | <i>ADAMTSL1</i>         | 0.15 | $2.05 \times 10^{-8}$  |
| rs9410528   | 9  | 82,125,143  | Intergenic              | 0.15 | $1.88 \times 10^{-8}$  |
| rs2779541   | 9  | 101,389,839 | <i>GABBR2</i>           | 0.13 | $4.93 \times 10^{-8}$  |
| rs2778917   | 9  | 101,390,273 | <i>GABBR2</i>           | 0.13 | $4.93 \times 10^{-8}$  |
| rs1930138   | 9  | 101,429,694 | <i>GABBR2</i>           | 0.13 | $4.96 \times 10^{-8}$  |
| rs516930    | 9  | 101,444,133 | <i>GABBR2</i>           | 0.13 | $1.97 \times 10^{-8}$  |
| rs12775723  | 10 | 12,492,177  | <i>CAMK1D</i>           | 0.15 | $2.00 \times 10^{-8}$  |
| rs73595808  | 10 | 19,716,100  | <i>MALRD1</i>           | 0.16 | $1.01 \times 10^{-8}$  |
| rs3004203   | 10 | 27,689,092  | <i>PTCHD3</i>           | 0.15 | $1.72 \times 10^{-8}$  |
| rs7125369   | 11 | 42,771,556  | Intergenic              | 0.15 | $2.23 \times 10^{-8}$  |
| rs60965002  | 11 | 42,772,716  | Intergenic              | 0.15 | $2.23 \times 10^{-8}$  |
| rs60522351  | 11 | 42,772,925  | Intergenic              | 0.15 | $2.23 \times 10^{-8}$  |
| rs148493095 | 11 | 42,774,590  | Intergenic              | 0.15 | $2.23 \times 10^{-8}$  |
| rs146594721 | 11 | 42,775,170  | Intergenic              | 0.15 | $2.23 \times 10^{-8}$  |
| rs59994772  | 11 | 42,778,594  | Intergenic              | 0.15 | $2.23 \times 10^{-8}$  |
| rs113768087 | 11 | 81,026,144  | Intergenic              | 0.16 | $3.28 \times 10^{-9}$  |
| rs76951239  | 11 | 81,032,805  | Intergenic              | 0.17 | $1.57 \times 10^{-9}$  |
| rs7103369   | 11 | 81,122,821  | Intergenic              | 0.15 | $4.71 \times 10^{-9}$  |
| rs36124182  | 12 | 24,214,934  | <i>SOX5</i>             | 0.15 | $1.11 \times 10^{-8}$  |
| rs12319043  | 12 | 24,233,568  | <i>SOX5</i>             | 0.14 | $2.99 \times 10^{-8}$  |
| rs75342935  | 12 | 24,246,016  | <i>SOX5</i>             | 0.15 | $1.36 \times 10^{-8}$  |
| rs17408255  | 12 | 24,255,994  | <i>SOX5</i>             | 0.15 | $1.36 \times 10^{-8}$  |
| rs11047261  | 12 | 24,257,228  | <i>SOX5</i>             | 0.15 | $1.36 \times 10^{-8}$  |
| rs12313817  | 12 | 24,260,884  | <i>SOX5</i>             | 0.15 | $1.36 \times 10^{-8}$  |
| rs75673453  | 12 | 118,989,792 | Intergenic              | 0.15 | $3.39 \times 10^{-8}$  |
| rs184647600 | 13 | 49,635,517  | <i>FNDC3A</i>           | 0.14 | $1.97 \times 10^{-8}$  |
| rs55812543  | 13 | 113,745,989 | <i>MCF2L</i>            | 0.15 | $1.92 \times 10^{-8}$  |
| rs75027256  | 14 | 51,976,087  | <i>FRMD6; FRMD6-AS2</i> | 0.14 | $7.24 \times 10^{-9}$  |
| rs28702736  | 14 | 62,435,456  | Intergenic              | 0.15 | $7.23 \times 10^{-9}$  |
| rs2372425   | 14 | 83,962,756  | Intergenic              | 0.15 | $2.30 \times 10^{-8}$  |
| rs17694128  | 14 | 83,977,073  | Intergenic              | 0.15 | $2.30 \times 10^{-8}$  |
| rs17621157  | 14 | 83,978,650  | Intergenic              | 0.15 | $2.30 \times 10^{-8}$  |
| rs76414300  | 14 | 83,980,412  | Intergenic              | 0.15 | $2.30 \times 10^{-8}$  |
| rs185357657 | 15 | 30,893,443  | Intergenic              | 0.15 | $3.96 \times 10^{-8}$  |

|             |    |            |                     |      |                        |
|-------------|----|------------|---------------------|------|------------------------|
| rs166723    | 15 | 39,520,759 | Intergenic          | 0.15 | $1.91 \times 10^{-8}$  |
| rs78540980  | 15 | 65,418,010 | <i>PDCD7</i>        | 0.13 | $4.05 \times 10^{-8}$  |
| rs11637917  | 15 | 65,856,459 | <i>PTPLAD1</i>      | 0.15 | $9.23 \times 10^{-9}$  |
| rs112556408 | 15 | 66,050,927 | <i>DENND4A</i>      | 0.16 | $1.72 \times 10^{-9}$  |
| rs74890395  | 15 | 66,052,091 | <i>DENND4A</i>      | 0.17 | $6.35 \times 10^{-10}$ |
| rs112538248 | 15 | 66,124,595 | Intergenic          | 0.15 | $1.88 \times 10^{-8}$  |
| rs78865086  | 15 | 66,126,145 | Intergenic          | 0.15 | $1.88 \times 10^{-8}$  |
| rs73475467  | 15 | 66,128,255 | Intergenic          | 0.15 | $1.88 \times 10^{-8}$  |
| rs11635670  | 15 | 66,286,114 | <i>MEGF11</i>       | 0.15 | $2.46 \times 10^{-8}$  |
| rs79955167  | 15 | 66,287,444 | <i>MEGF11</i>       | 0.15 | $2.46 \times 10^{-8}$  |
| rs77751535  | 15 | 66,288,134 | <i>MEGF11</i>       | 0.15 | $2.46 \times 10^{-8}$  |
| rs74334280  | 15 | 66,288,184 | <i>MEGF11</i>       | 0.15 | $2.46 \times 10^{-8}$  |
| rs28564180  | 15 | 66,288,726 | <i>MEGF11</i>       | 0.15 | $4.04 \times 10^{-8}$  |
| rs76620910  | 15 | 66,295,960 | <i>MEGF11</i>       | 0.15 | $2.46 \times 10^{-8}$  |
| rs76394551  | 15 | 66,304,999 | <i>MEGF11</i>       | 0.15 | $2.42 \times 10^{-8}$  |
| rs2160305   | 16 | 54,006,217 | <i>FTO</i>          | 0.15 | $4.96 \times 10^{-8}$  |
| rs75990376  | 16 | 79,792,970 | <i>LOC102467146</i> | 0.16 | $2.84 \times 10^{-10}$ |
| rs9925929   | 16 | 79,798,511 | <i>LOC102467146</i> | 0.16 | $2.84 \times 10^{-10}$ |
| rs78303331  | 17 | 5,771,490  | <i>LOC339166</i>    | 0.15 | $4.59 \times 10^{-8}$  |
| rs36122742  | 17 | 60,567,313 | <i>TLK2</i>         | 0.15 | $3.55 \times 10^{-8}$  |
| rs117969406 | 17 | 77,688,797 | Intergenic          | 0.15 | $1.12 \times 10^{-8}$  |
| rs4889986   | 17 | 77,692,127 | Intergenic          | 0.15 | $1.12 \times 10^{-8}$  |
| rs72490478  | 17 | 77,692,979 | Intergenic          | 0.15 | $2.56 \times 10^{-8}$  |
| rs62076895  | 18 | 3,199,538  | <i>MYOM1</i>        | 0.14 | $4.95 \times 10^{-8}$  |
| rs9964300   | 18 | 3,215,030  | <i>MYOM1</i>        | 0.17 | $2.88 \times 10^{-9}$  |
| rs1662313   | 18 | 3,217,953  | <i>MYOM1</i>        | 0.15 | $1.10 \times 10^{-8}$  |
| rs1791068   | 18 | 3,219,215  | <i>MYOM1</i>        | 0.15 | $1.10 \times 10^{-8}$  |
| rs1791062   | 18 | 3,219,744  | <i>MYOM1</i>        | 0.15 | $1.10 \times 10^{-8}$  |
| rs1791133   | 18 | 3,220,050  | <i>MYOM1</i>        | 0.15 | $1.10 \times 10^{-8}$  |
| rs1791131   | 18 | 3,220,354  | Intergenic          | 0.15 | $1.10 \times 10^{-8}$  |
| rs1662312   | 18 | 3,220,450  | Intergenic          | 0.15 | $1.10 \times 10^{-8}$  |
| rs9963109   | 18 | 3,220,497  | Intergenic          | 0.15 | $1.10 \times 10^{-8}$  |
| rs9955283   | 18 | 3,220,731  | Intergenic          | 0.15 | $1.10 \times 10^{-8}$  |
| rs9963511   | 18 | 3,220,885  | Intergenic          | 0.15 | $1.41 \times 10^{-8}$  |
| rs1808916   | 18 | 3,221,035  | Intergenic          | 0.15 | $1.10 \times 10^{-8}$  |
| rs1808915   | 18 | 3,221,166  | Intergenic          | 0.15 | $1.41 \times 10^{-8}$  |
| rs894565    | 18 | 3,221,660  | Intergenic          | 0.15 | $1.10 \times 10^{-8}$  |
| rs894564    | 18 | 3,221,739  | Intergenic          | 0.15 | $1.41 \times 10^{-8}$  |
| rs9959375   | 18 | 3,222,795  | Intergenic          | 0.15 | $1.10 \times 10^{-8}$  |
| rs9950110   | 18 | 3,223,005  | Intergenic          | 0.15 | $1.10 \times 10^{-8}$  |
| rs9949484   | 18 | 3,223,132  | Intergenic          | 0.15 | $1.10 \times 10^{-8}$  |
| rs9962345   | 18 | 3,223,413  | Intergenic          | 0.15 | $1.10 \times 10^{-8}$  |
| rs1662310   | 18 | 3,223,762  | Intergenic          | 0.15 | $1.10 \times 10^{-8}$  |
| rs7238780   | 18 | 3,224,807  | Intergenic          | 0.14 | $1.86 \times 10^{-8}$  |
| rs752396    | 18 | 3,226,089  | Intergenic          | 0.15 | $1.10 \times 10^{-8}$  |
| rs11664526  | 18 | 3,227,554  | Intergenic          | 0.15 | $5.18 \times 10^{-9}$  |
| rs1662307   | 18 | 3,228,096  | Intergenic          | 0.16 | $3.97 \times 10^{-9}$  |
| rs9957993   | 18 | 3,228,493  | Intergenic          | 0.16 | $3.97 \times 10^{-9}$  |
| rs1662305   | 18 | 3,229,023  | Intergenic          | 0.16 | $3.97 \times 10^{-9}$  |

|             |             |    |             |                 |      |                        |
|-------------|-------------|----|-------------|-----------------|------|------------------------|
|             | rs28552959  | 18 | 3,229,690   | Intergenic      | 0.15 | $5.75 \times 10^{-9}$  |
|             | rs2920346   | 18 | 3,229,743   | Intergenic      | 0.16 | $3.97 \times 10^{-9}$  |
|             | rs62076898  | 18 | 3,231,615   | Intergenic      | 0.16 | $3.97 \times 10^{-9}$  |
|             | rs35500334  | 18 | 3,233,236   | Intergenic      | 0.16 | $1.58 \times 10^{-9}$  |
|             | rs1791069   | 18 | 3,233,609   | Intergenic      | 0.16 | $1.58 \times 10^{-9}$  |
|             | rs34730670  | 18 | 3,237,947   | Intergenic      | 0.16 | $2.61 \times 10^{-9}$  |
|             | rs4447514   | 18 | 3,237,973   | Intergenic      | 0.16 | $2.61 \times 10^{-9}$  |
|             | rs16976822  | 18 | 11,886,867  | <i>MPPE1</i>    | 0.14 | $3.96 \times 10^{-8}$  |
|             | rs16976823  | 18 | 11,887,031  | <i>MPPE1</i>    | 0.14 | $3.96 \times 10^{-8}$  |
|             | rs9951817   | 18 | 11,887,388  | <i>MPPE1</i>    | 0.14 | $3.96 \times 10^{-8}$  |
|             | rs116582165 | 18 | 66,625,544  | <i>CCDC102B</i> | 0.16 | $1.44 \times 10^{-8}$  |
|             | rs12975335  | 19 | 22,846,680  | <i>ZNF492</i>   | 0.16 | $1.17 \times 10^{-9}$  |
|             | rs62118831  | 19 | 22,846,697  | <i>ZNF492</i>   | 0.17 | $8.06 \times 10^{-11}$ |
|             | rs73069649  | 19 | 56,777,592  | Intergenic      | 0.15 | $4.75 \times 10^{-8}$  |
|             | rs9789836   | 20 | 1,178,409   | Intergenic      | 0.16 | $1.18 \times 10^{-8}$  |
|             | rs74397637  | 20 | 54,837,046  | Intergenic      | 0.12 | $3.00 \times 10^{-8}$  |
|             | rs17457993  | 20 | 54,837,218  | Intergenic      | 0.12 | $3.00 \times 10^{-8}$  |
|             | rs77843524  | 20 | 54,837,236  | Intergenic      | 0.12 | $3.00 \times 10^{-8}$  |
|             | rs78102068  | 20 | 54,837,294  | Intergenic      | 0.11 | $4.96 \times 10^{-8}$  |
|             | rs75341483  | 20 | 54,837,471  | Intergenic      | 0.12 | $3.00 \times 10^{-8}$  |
|             | rs75108000  | 20 | 54,838,516  | Intergenic      | 0.12 | $2.08 \times 10^{-8}$  |
|             | rs17003413  | 22 | 43,313,954  | <i>PACIN2</i>   | 0.15 | $4.42 \times 10^{-8}$  |
| <i>KIT</i>  | rs113426339 | 1  | 178,947,559 | Intergenic      | 0.06 | $3.52 \times 10^{-8}$  |
|             | rs12520827  | 5  | 113,396,378 | Intergenic      | 0.05 | $5.54 \times 10^{-9}$  |
|             | rs145306580 | 9  | 4,190,807   | <i>GLIS3</i>    | 0.07 | $5.15 \times 10^{-9}$  |
| <i>KRAS</i> | rs4078119   | 1  | 101,819,489 | Intergenic      | 1.72 | $5.75 \times 10^{-9}$  |
|             | rs12568209  | 1  | 101,820,149 | Intergenic      | 1.72 | $5.75 \times 10^{-9}$  |
|             | rs58904095  | 1  | 101,825,899 | Intergenic      | 1.77 | $3.22 \times 10^{-9}$  |
|             | rs2087709   | 1  | 101,827,992 | Intergenic      | 1.77 | $3.22 \times 10^{-9}$  |
|             | rs115540792 | 1  | 101,828,584 | Intergenic      | 1.77 | $3.22 \times 10^{-9}$  |
|             | rs7538660   | 1  | 101,833,755 | Intergenic      | 1.77 | $3.22 \times 10^{-9}$  |
|             | rs76297543  | 1  | 101,834,525 | Intergenic      | 1.77 | $3.22 \times 10^{-9}$  |
|             | rs11164181  | 1  | 101,845,846 | Intergenic      | 1.92 | $3.80 \times 10^{-9}$  |
|             | rs111381284 | 5  | 44,496,612  | Intergenic      | 1.84 | $5.06 \times 10^{-9}$  |
|             | rs17320222  | 5  | 44,499,291  | Intergenic      | 1.77 | $1.01 \times 10^{-8}$  |
|             | rs78297490  | 5  | 44,542,953  | Intergenic      | 1.80 | $8.73 \times 10^{-9}$  |
|             | rs11953011  | 5  | 44,627,658  | Intergenic      | 1.74 | $9.65 \times 10^{-9}$  |
|             | rs181701912 | 5  | 44,888,831  | Intergenic      | 1.45 | $4.49 \times 10^{-9}$  |
|             | rs4988787   | 7  | 8,994,004   | Intergenic      | 1.71 | $1.93 \times 10^{-10}$ |
|             | rs917940    | 7  | 8,994,995   | Intergenic      | 1.78 | $8.18 \times 10^{-11}$ |
|             | rs6972076   | 7  | 8,995,240   | Intergenic      | 1.78 | $8.18 \times 10^{-11}$ |
|             | rs6972078   | 7  | 8,995,243   | Intergenic      | 1.78 | $8.18 \times 10^{-11}$ |
|             | rs2192597   | 7  | 8,995,694   | Intergenic      | 1.76 | $7.61 \times 10^{-11}$ |
|             | rs2110558   | 7  | 8,995,761   | Intergenic      | 1.77 | $5.83 \times 10^{-11}$ |
|             | rs6463861   | 7  | 8,996,028   | Intergenic      | 1.78 | $8.18 \times 10^{-11}$ |
|             | rs10238110  | 7  | 8,996,316   | Intergenic      | 2.12 | $3.44 \times 10^{-12}$ |
|             | rs4033270   | 7  | 8,998,665   | Intergenic      | 1.78 | $8.18 \times 10^{-11}$ |
|             | rs4725149   | 7  | 8,999,140   | Intergenic      | 1.72 | $1.58 \times 10^{-10}$ |
|             | rs2024377   | 7  | 9,001,674   | Intergenic      | 1.78 | $8.18 \times 10^{-11}$ |

|              |             |   |             |                |      |                        |
|--------------|-------------|---|-------------|----------------|------|------------------------|
|              | rs6971402   | 7 | 9,002,103   | Intergenic     | 1.78 | $8.18 \times 10^{-11}$ |
|              | rs6971697   | 7 | 9,002,250   | Intergenic     | 1.78 | $8.18 \times 10^{-11}$ |
|              | rs6959898   | 7 | 9,010,322   | Intergenic     | 1.91 | $5.83 \times 10^{-10}$ |
|              | rs9655535   | 7 | 9,011,671   | Intergenic     | 1.91 | $5.83 \times 10^{-10}$ |
| <i>LAMAI</i> | rs6677231   | 1 | 35,042,287  | Intergenic     | 0.10 | $4.62 \times 10^{-8}$  |
|              | rs74973423  | 1 | 41,905,705  | Intergenic     | 0.12 | $1.27 \times 10^{-8}$  |
|              | rs76294340  | 1 | 57,014,332  | <i>PPAP2B</i>  | 0.10 | $2.83 \times 10^{-8}$  |
|              | rs75346781  | 1 | 57,015,017  | <i>PPAP2B</i>  | 0.10 | $2.83 \times 10^{-8}$  |
|              | rs4853431   | 2 | 79,297,474  | Intergenic     | 0.12 | $6.89 \times 10^{-9}$  |
|              | rs67844640  | 2 | 154,003,627 | Intergenic     | 0.10 | $1.18 \times 10^{-8}$  |
|              | rs6756148   | 2 | 199,371,044 | Intergenic     | 0.08 | $3.67 \times 10^{-8}$  |
|              | rs78832831  | 3 | 15,546,568  | <i>COLQ</i>    | 0.12 | $4.21 \times 10^{-9}$  |
|              | rs13087509  | 3 | 22,514,136  | Intergenic     | 0.09 | $3.39 \times 10^{-8}$  |
|              | rs6441714   | 3 | 102,985,514 | Intergenic     | 0.07 | $5.03 \times 10^{-9}$  |
|              | rs16829413  | 3 | 118,904,916 | <i>UPK1B</i>   | 0.11 | $3.95 \times 10^{-10}$ |
|              | rs67108505  | 3 | 118,908,168 | <i>UPK1B</i>   | 0.11 | $3.95 \times 10^{-10}$ |
|              | rs56193405  | 3 | 118,908,334 | <i>UPK1B</i>   | 0.11 | $1.67 \times 10^{-9}$  |
|              | rs13320556  | 3 | 118,913,677 | <i>UPK1B</i>   | 0.13 | $2.18 \times 10^{-11}$ |
|              | rs13324867  | 3 | 118,914,724 | <i>UPK1B</i>   | 0.10 | $4.42 \times 10^{-10}$ |
|              | rs13315549  | 3 | 118,917,422 | <i>UPK1B</i>   | 0.12 | $2.57 \times 10^{-10}$ |
|              | rs9844248   | 3 | 118,922,183 | <i>UPK1B</i>   | 0.12 | $1.39 \times 10^{-10}$ |
|              | rs6766503   | 3 | 118,940,383 | <i>B4GALT4</i> | 0.12 | $2.57 \times 10^{-10}$ |
|              | rs28428903  | 3 | 118,941,387 | <i>B4GALT4</i> | 0.13 | $1.14 \times 10^{-10}$ |
|              | rs12487052  | 3 | 118,942,475 | <i>B4GALT4</i> | 0.12 | $2.57 \times 10^{-10}$ |
|              | rs4234656   | 3 | 118,948,155 | <i>B4GALT4</i> | 0.12 | $2.57 \times 10^{-10}$ |
|              | rs12492305  | 3 | 118,953,691 | <i>B4GALT4</i> | 0.12 | $2.57 \times 10^{-10}$ |
|              | rs6805930   | 3 | 118,955,611 | <i>B4GALT4</i> | 0.12 | $2.57 \times 10^{-10}$ |
|              | rs2594731   | 3 | 118,963,980 | Intergenic     | 0.12 | $2.57 \times 10^{-10}$ |
|              | rs79728677  | 4 | 14,705,366  | Intergenic     | 0.10 | $5.98 \times 10^{-10}$ |
|              | rs74991977  | 4 | 14,705,416  | Intergenic     | 0.10 | $5.98 \times 10^{-10}$ |
|              | rs76707362  | 4 | 14,712,144  | Intergenic     | 0.10 | $5.98 \times 10^{-10}$ |
|              | rs77620321  | 4 | 14,712,226  | Intergenic     | 0.10 | $5.98 \times 10^{-10}$ |
|              | rs78279840  | 4 | 14,712,603  | Intergenic     | 0.10 | $5.98 \times 10^{-10}$ |
|              | rs77645207  | 4 | 14,713,460  | Intergenic     | 0.10 | $5.98 \times 10^{-10}$ |
|              | rs77618414  | 4 | 14,713,994  | Intergenic     | 0.10 | $5.98 \times 10^{-10}$ |
|              | rs76479616  | 4 | 14,714,272  | Intergenic     | 0.10 | $5.98 \times 10^{-10}$ |
|              | rs78172472  | 4 | 14,714,691  | Intergenic     | 0.10 | $5.98 \times 10^{-10}$ |
|              | rs77695728  | 4 | 14,715,009  | Intergenic     | 0.10 | $5.98 \times 10^{-10}$ |
|              | rs75488677  | 4 | 14,715,053  | Intergenic     | 0.10 | $5.98 \times 10^{-10}$ |
|              | rs79204056  | 4 | 14,715,126  | Intergenic     | 0.10 | $5.98 \times 10^{-10}$ |
|              | rs78559953  | 4 | 14,715,164  | Intergenic     | 0.10 | $5.98 \times 10^{-10}$ |
|              | rs75981573  | 4 | 14,715,458  | Intergenic     | 0.10 | $5.98 \times 10^{-10}$ |
|              | rs79970143  | 4 | 14,715,781  | Intergenic     | 0.10 | $5.98 \times 10^{-10}$ |
|              | rs76717304  | 4 | 14,716,034  | Intergenic     | 0.10 | $5.98 \times 10^{-10}$ |
|              | rs80065600  | 4 | 14,716,106  | Intergenic     | 0.10 | $5.98 \times 10^{-10}$ |
|              | rs114770862 | 4 | 14,716,888  | Intergenic     | 0.10 | $5.98 \times 10^{-10}$ |
|              | rs79625692  | 4 | 14,716,949  | Intergenic     | 0.10 | $1.00 \times 10^{-9}$  |
|              | rs77503811  | 4 | 14,717,068  | Intergenic     | 0.10 | $5.98 \times 10^{-10}$ |
|              | rs77289065  | 4 | 14,717,275  | Intergenic     | 0.10 | $5.98 \times 10^{-10}$ |

|             |   |             |                  |      |                        |
|-------------|---|-------------|------------------|------|------------------------|
| rs74878175  | 4 | 14,717,391  | Intergenic       | 0.10 | $5.98 \times 10^{-10}$ |
| rs76034446  | 4 | 14,717,395  | Intergenic       | 0.10 | $5.98 \times 10^{-10}$ |
| rs77052203  | 4 | 14,717,643  | Intergenic       | 0.10 | $5.98 \times 10^{-10}$ |
| rs76478713  | 4 | 14,717,660  | Intergenic       | 0.10 | $5.98 \times 10^{-10}$ |
| rs80209817  | 4 | 14,717,676  | Intergenic       | 0.10 | $5.98 \times 10^{-10}$ |
| rs76602302  | 4 | 14,717,920  | Intergenic       | 0.10 | $5.98 \times 10^{-10}$ |
| rs75420187  | 4 | 14,718,318  | Intergenic       | 0.10 | $5.98 \times 10^{-10}$ |
| rs78067842  | 4 | 14,718,328  | Intergenic       | 0.10 | $5.98 \times 10^{-10}$ |
| rs143640407 | 4 | 14,726,454  | Intergenic       | 0.12 | $1.94 \times 10^{-11}$ |
| rs112694700 | 4 | 14,729,063  | Intergenic       | 0.14 | $3.72 \times 10^{-13}$ |
| rs79154919  | 4 | 14,732,089  | Intergenic       | 0.14 | $4.17 \times 10^{-13}$ |
| rs17623927  | 4 | 20,762,322  | <i>KCNIP4</i>    | 0.11 | $3.06 \times 10^{-9}$  |
| rs28651812  | 4 | 57,168,457  | <i>KIAA1211</i>  | 0.09 | $3.49 \times 10^{-8}$  |
| rs74403828  | 4 | 57,170,138  | <i>KIAA1211</i>  | 0.09 | $1.77 \times 10^{-8}$  |
| rs11736632  | 4 | 57,172,335  | <i>KIAA1211</i>  | 0.11 | $6.28 \times 10^{-10}$ |
| rs2697209   | 4 | 63,335,776  | Intergenic       | 0.12 | $4.16 \times 10^{-9}$  |
| rs77779319  | 4 | 182,508,854 | Intergenic       | 0.13 | $8.53 \times 10^{-11}$ |
| rs4958976   | 5 | 177,349,356 | Intergenic       | 0.10 | $4.40 \times 10^{-8}$  |
| rs74769936  | 6 | 47,322,096  | Intergenic       | 0.11 | $3.59 \times 10^{-9}$  |
| rs186415025 | 6 | 77,920,168  | Intergenic       | 0.12 | $7.02 \times 10^{-9}$  |
| rs72923610  | 6 | 91,438,094  | Intergenic       | 0.09 | $3.31 \times 10^{-8}$  |
| rs12664631  | 6 | 91,448,046  | Intergenic       | 0.09 | $3.31 \times 10^{-8}$  |
| rs143022854 | 6 | 91,448,290  | Intergenic       | 0.09 | $3.31 \times 10^{-8}$  |
| rs12206219  | 6 | 142,434,511 | Intergenic       | 0.09 | $1.92 \times 10^{-8}$  |
| rs77370456  | 6 | 142,485,489 | <i>VTA1</i>      | 0.10 | $1.24 \times 10^{-8}$  |
| rs12192519  | 6 | 142,521,654 | <i>VTA1</i>      | 0.09 | $2.71 \times 10^{-8}$  |
| rs78970535  | 6 | 142,855,375 | <i>LOC153910</i> | 0.11 | $9.41 \times 10^{-9}$  |
| rs2627286   | 8 | 2,792,169   | Intergenic       | 0.10 | $1.98 \times 10^{-8}$  |
| rs7010713   | 8 | 2,796,574   | <i>CSMD1</i>     | 0.11 | $2.19 \times 10^{-8}$  |
| rs76931398  | 8 | 2,796,980   | <i>CSMD1</i>     | 0.11 | $2.19 \times 10^{-8}$  |
| rs75864120  | 8 | 2,806,636   | <i>CSMD1</i>     | 0.11 | $9.10 \times 10^{-9}$  |
| rs117094499 | 8 | 2,811,150   | <i>CSMD1</i>     | 0.11 | $1.14 \times 10^{-8}$  |
| rs151017158 | 8 | 2,831,641   | <i>CSMD1</i>     | 0.12 | $4.28 \times 10^{-9}$  |
| rs113798870 | 8 | 2,834,332   | <i>CSMD1</i>     | 0.12 | $4.28 \times 10^{-9}$  |
| rs79446325  | 8 | 2,840,584   | <i>CSMD1</i>     | 0.12 | $4.28 \times 10^{-9}$  |
| rs113799212 | 8 | 2,841,896   | <i>CSMD1</i>     | 0.12 | $4.28 \times 10^{-9}$  |
| rs112074569 | 8 | 2,841,956   | <i>CSMD1</i>     | 0.12 | $4.28 \times 10^{-9}$  |
| rs74370015  | 8 | 2,842,159   | <i>CSMD1</i>     | 0.12 | $4.28 \times 10^{-9}$  |
| rs76698791  | 8 | 2,843,303   | <i>CSMD1</i>     | 0.12 | $4.28 \times 10^{-9}$  |
| rs113222134 | 8 | 2,844,792   | <i>CSMD1</i>     | 0.12 | $4.28 \times 10^{-9}$  |
| rs74829597  | 8 | 2,845,476   | <i>CSMD1</i>     | 0.11 | $5.48 \times 10^{-9}$  |
| rs78173892  | 8 | 2,847,267   | <i>CSMD1</i>     | 0.13 | $1.22 \times 10^{-9}$  |
| rs75031764  | 8 | 2,847,383   | <i>CSMD1</i>     | 0.13 | $1.22 \times 10^{-9}$  |
| rs75583381  | 8 | 2,847,749   | <i>CSMD1</i>     | 0.12 | $9.03 \times 10^{-10}$ |
| rs675492    | 8 | 2,847,793   | <i>CSMD1</i>     | 0.11 | $1.89 \times 10^{-9}$  |
| rs113827317 | 8 | 2,848,915   | <i>CSMD1</i>     | 0.12 | $2.39 \times 10^{-9}$  |
| rs74726699  | 8 | 2,851,730   | <i>CSMD1</i>     | 0.12 | $4.28 \times 10^{-9}$  |
| rs111902488 | 8 | 2,852,710   | <i>CSMD1</i>     | 0.12 | $4.28 \times 10^{-9}$  |
| rs150958172 | 8 | 3,652,825   | <i>CSMD1</i>     | 0.11 | $2.03 \times 10^{-8}$  |

|             |    |             |               |      |                        |
|-------------|----|-------------|---------------|------|------------------------|
| rs73239493  | 8  | 27,121,839  | Intergenic    | 0.12 | $2.02 \times 10^{-9}$  |
| rs7843876   | 8  | 68,335,509  | <i>CPA6</i>   | 0.12 | $9.92 \times 10^{-9}$  |
| rs3886996   | 8  | 70,227,638  | Intergenic    | 0.13 | $9.53 \times 10^{-10}$ |
| rs34279900  | 8  | 128,650,492 | Intergenic    | 0.14 | $1.64 \times 10^{-12}$ |
| rs16907536  | 12 | 12,085,777  | Intergenic    | 0.09 | $3.17 \times 10^{-8}$  |
| rs11614805  | 12 | 20,745,536  | <i>PDE3A</i>  | 0.12 | $7.43 \times 10^{-9}$  |
| rs11608933  | 12 | 20,745,624  | <i>PDE3A</i>  | 0.12 | $7.43 \times 10^{-9}$  |
| rs60768792  | 12 | 20,751,178  | <i>PDE3A</i>  | 0.12 | $7.43 \times 10^{-9}$  |
| rs78215403  | 12 | 20,752,722  | <i>PDE3A</i>  | 0.12 | $1.07 \times 10^{-8}$  |
| rs75350945  | 12 | 20,754,415  | <i>PDE3A</i>  | 0.12 | $1.07 \times 10^{-8}$  |
| rs192706913 | 12 | 20,756,496  | <i>PDE3A</i>  | 0.12 | $1.07 \times 10^{-8}$  |
| rs80013638  | 12 | 20,756,767  | <i>PDE3A</i>  | 0.12 | $1.07 \times 10^{-8}$  |
| rs75758830  | 12 | 20,756,802  | <i>PDE3A</i>  | 0.12 | $1.07 \times 10^{-8}$  |
| rs117816662 | 12 | 20,757,173  | <i>PDE3A</i>  | 0.12 | $6.72 \times 10^{-9}$  |
| rs78190456  | 12 | 20,757,465  | <i>PDE3A</i>  | 0.12 | $1.07 \times 10^{-8}$  |
| rs11611208  | 12 | 20,758,613  | <i>PDE3A</i>  | 0.12 | $1.07 \times 10^{-8}$  |
| rs76021746  | 12 | 20,759,312  | <i>PDE3A</i>  | 0.12 | $1.07 \times 10^{-8}$  |
| rs117315355 | 12 | 20,759,533  | <i>PDE3A</i>  | 0.11 | $1.93 \times 10^{-8}$  |
| rs6487113   | 12 | 20,759,985  | <i>PDE3A</i>  | 0.11 | $3.47 \times 10^{-8}$  |
| rs7964099   | 12 | 20,764,100  | <i>PDE3A</i>  | 0.12 | $1.07 \times 10^{-8}$  |
| rs76357740  | 12 | 20,764,279  | <i>PDE3A</i>  | 0.12 | $1.07 \times 10^{-8}$  |
| rs7308381   | 12 | 20,766,685  | <i>PDE3A</i>  | 0.11 | $2.36 \times 10^{-8}$  |
| rs78245070  | 12 | 20,768,027  | <i>PDE3A</i>  | 0.11 | $2.36 \times 10^{-8}$  |
| rs76785459  | 12 | 20,769,617  | <i>PDE3A</i>  | 0.11 | $2.36 \times 10^{-8}$  |
| rs11610456  | 12 | 20,770,008  | <i>PDE3A</i>  | 0.11 | $2.36 \times 10^{-8}$  |
| rs9668712   | 12 | 20,776,764  | <i>PDE3A</i>  | 0.11 | $2.36 \times 10^{-8}$  |
| rs11611971  | 12 | 20,777,782  | <i>PDE3A</i>  | 0.11 | $2.36 \times 10^{-8}$  |
| rs76769379  | 12 | 20,784,241  | <i>PDE3A</i>  | 0.12 | $6.65 \times 10^{-9}$  |
| rs12307274  | 12 | 20,785,542  | <i>PDE3A</i>  | 0.11 | $1.51 \times 10^{-8}$  |
| rs76543675  | 12 | 20,789,278  | <i>PDE3A</i>  | 0.12 | $1.10 \times 10^{-8}$  |
| rs11615708  | 12 | 20,789,548  | <i>PDE3A</i>  | 0.12 | $1.10 \times 10^{-8}$  |
| rs80041598  | 12 | 20,794,447  | <i>PDE3A</i>  | 0.11 | $2.42 \times 10^{-8}$  |
| rs74528726  | 12 | 20,794,563  | <i>PDE3A</i>  | 0.13 | $1.60 \times 10^{-9}$  |
| rs61978204  | 14 | 70,642,537  | <i>SLC8A3</i> | 0.10 | $2.13 \times 10^{-8}$  |
| rs9972608   | 15 | 27,905,337  | Intergenic    | 0.09 | $6.68 \times 10^{-9}$  |
| rs62001293  | 15 | 27,909,092  | Intergenic    | 0.09 | $5.64 \times 10^{-9}$  |
| rs11853117  | 15 | 27,910,801  | Intergenic    | 0.09 | $7.18 \times 10^{-9}$  |
| rs3097531   | 15 | 27,910,951  | Intergenic    | 0.08 | $3.36 \times 10^{-8}$  |
| rs12591822  | 15 | 27,911,483  | Intergenic    | 0.09 | $7.18 \times 10^{-9}$  |
| rs17746385  | 15 | 27,911,949  | Intergenic    | 0.09 | $7.18 \times 10^{-9}$  |
| rs3098578   | 15 | 27,912,716  | Intergenic    | 0.08 | $3.36 \times 10^{-8}$  |
| rs3098579   | 15 | 27,912,880  | Intergenic    | 0.08 | $3.36 \times 10^{-8}$  |
| rs3098582   | 15 | 27,913,398  | Intergenic    | 0.08 | $3.36 \times 10^{-8}$  |
| rs57784695  | 15 | 101,636,431 | Intergenic    | 0.10 | $4.59 \times 10^{-9}$  |
| rs117861357 | 17 | 25,308,787  | Intergenic    | 0.11 | $2.30 \times 10^{-8}$  |
| rs78695172  | 17 | 25,377,285  | Intergenic    | 0.11 | $3.57 \times 10^{-8}$  |
| rs8089682   | 18 | 28,574,472  | <i>DSC3</i>   | 0.12 | $1.56 \times 10^{-9}$  |
| rs12965995  | 18 | 28,575,626  | <i>DSC3</i>   | 0.12 | $1.56 \times 10^{-9}$  |
| rs1789051   | 18 | 28,576,533  | <i>DSC3</i>   | 0.12 | $1.56 \times 10^{-9}$  |



|              |             |    |             |                      |       |                        |
|--------------|-------------|----|-------------|----------------------|-------|------------------------|
|              | rs35877601  | 18 | 28,577,315  | <i>DSC3</i>          | 0.12  | $1.56 \times 10^{-9}$  |
|              | rs17716604  | 18 | 47,654,952  | <i>MYO5B</i>         | 0.12  | $1.56 \times 10^{-9}$  |
|              | rs12980482  | 19 | 19,792,816  | Intergenic           | 0.13  | $1.49 \times 10^{-9}$  |
|              | rs112637369 | 22 | 24,026,240  | <i>GUSBP11</i>       | 0.11  | $1.29 \times 10^{-9}$  |
|              | rs76947034  | 22 | 24,035,679  | <i>GUSBP11; RGL4</i> | 0.11  | $7.75 \times 10^{-10}$ |
|              | rs6004528   | 22 | 25,669,780  | Intergenic           | 0.08  | $4.42 \times 10^{-9}$  |
|              | rs77216574  | 22 | 25,688,138  | Intergenic           | 0.11  | $1.77 \times 10^{-8}$  |
|              | rs146186595 | 22 | 25,689,257  | Intergenic           | 0.11  | $1.77 \times 10^{-8}$  |
| <i>LAMB1</i> | rs72670917  | 1  | 39,077,160  | Intergenic           | 1.39  | $1.40 \times 10^{-8}$  |
|              | rs72670919  | 1  | 39,077,554  | Intergenic           | 1.39  | $1.40 \times 10^{-8}$  |
|              | rs75466349  | 1  | 39,077,626  | Intergenic           | 1.39  | $1.40 \times 10^{-8}$  |
|              | rs72670920  | 1  | 39,077,644  | Intergenic           | 1.39  | $1.40 \times 10^{-8}$  |
|              | rs56042036  | 1  | 39,077,914  | Intergenic           | 1.39  | $1.40 \times 10^{-8}$  |
|              | rs67038721  | 1  | 39,087,924  | Intergenic           | 1.33  | $3.91 \times 10^{-8}$  |
|              | rs72656105  | 1  | 39,108,736  | Intergenic           | 1.33  | $3.91 \times 10^{-8}$  |
|              | rs11939141  | 4  | 96,380,589  | <i>UNC5C</i>         | 1.45  | $4.16 \times 10^{-8}$  |
|              | rs17402898  | 7  | 8,309,069   | Intergenic           | 1.31  | $3.01 \times 10^{-8}$  |
| <i>LAMB3</i> | rs76510931  | 1  | 35,043,331  | Intergenic           | 0.52  | $4.43 \times 10^{-8}$  |
|              | rs55751920  | 1  | 35,046,752  | Intergenic           | 0.52  | $3.27 \times 10^{-8}$  |
|              | rs11983244  | 7  | 14,200,667  | <i>DGKB</i>          | 0.49  | $1.77 \times 10^{-8}$  |
|              | rs139651235 | 8  | 109,993,018 | Intergenic           | 0.51  | $4.98 \times 10^{-8}$  |
|              | rs67897587  | 12 | 13,293,153  | Intergenic           | 0.52  | $1.30 \times 10^{-8}$  |
|              | rs17717574  | 16 | 6,012,336   | Intergenic           | 0.42  | $1.28 \times 10^{-9}$  |
| <i>LAMC1</i> | rs79375470  | 3  | 150,408,364 | <i>ERICH6</i>        | 10.28 | $2.27 \times 10^{-8}$  |
|              | rs239509    | 6  | 80,691,070  | Intergenic           | 8.91  | $3.79 \times 10^{-8}$  |
|              | rs183034640 | 17 | 48,378,305  | Intergenic           | 8.12  | $4.54 \times 10^{-8}$  |
| <i>LAMC2</i> | rs17386406  | 1  | 8,643,497   | <i>RERE</i>          | 0.54  | $1.06 \times 10^{-9}$  |
|              | rs74060148  | 1  | 15,324,642  | <i>KAZN</i>          | 0.50  | $4.69 \times 10^{-8}$  |
|              | rs11205415  | 1  | 249,120,684 | Intergenic           | 0.49  | $2.40 \times 10^{-8}$  |
|              | rs11205416  | 1  | 249,120,794 | Intergenic           | 0.53  | $5.28 \times 10^{-9}$  |
|              | rs7565217   | 2  | 47,248,466  | <i>TTC7A</i>         | 0.42  | $3.35 \times 10^{-8}$  |
|              | rs7565682   | 2  | 47,248,833  | <i>TTC7A</i>         | 0.42  | $2.67 \times 10^{-8}$  |
|              | rs7565683   | 2  | 47,248,834  | <i>TTC7A</i>         | 0.42  | $2.67 \times 10^{-8}$  |
|              | rs78932664  | 3  | 22,064,740  | Intergenic           | 0.53  | $4.74 \times 10^{-8}$  |
|              | rs142576515 | 3  | 121,765,754 | Intergenic           | 0.50  | $1.11 \times 10^{-8}$  |
|              | rs55965158  | 3  | 175,006,562 | <i>NAALADL2</i>      | 0.48  | $2.13 \times 10^{-11}$ |
|              | rs56250770  | 3  | 175,009,526 | <i>NAALADL2</i>      | 0.48  | $2.13 \times 10^{-11}$ |
|              | rs10936837  | 3  | 175,014,005 | <i>NAALADL2</i>      | 0.37  | $4.03 \times 10^{-8}$  |
|              | rs10936838  | 3  | 175,014,019 | <i>NAALADL2</i>      | 0.37  | $4.03 \times 10^{-8}$  |
|              | rs76606542  | 3  | 178,110,638 | Intergenic           | 0.56  | $3.28 \times 10^{-8}$  |
|              | rs9822877   | 3  | 178,111,729 | Intergenic           | 0.56  | $3.28 \times 10^{-8}$  |
|              | rs13434209  | 3  | 178,112,406 | Intergenic           | 0.56  | $3.28 \times 10^{-8}$  |
|              | rs77650620  | 3  | 178,117,420 | Intergenic           | 0.56  | $3.28 \times 10^{-8}$  |
|              | rs76148250  | 3  | 178,119,737 | Intergenic           | 0.56  | $3.28 \times 10^{-8}$  |
|              | rs79982808  | 3  | 178,119,788 | Intergenic           | 0.56  | $3.28 \times 10^{-8}$  |
|              | rs67267562  | 4  | 67,128,141  | Intergenic           | 0.47  | $2.75 \times 10^{-9}$  |
|              | rs34626813  | 4  | 67,128,705  | Intergenic           | 0.47  | $2.75 \times 10^{-9}$  |
|              | rs67857601  | 4  | 67,142,691  | Intergenic           | 0.46  | $3.32 \times 10^{-9}$  |
|              | rs34321123  | 4  | 67,142,703  | Intergenic           | 0.46  | $3.32 \times 10^{-9}$  |

|             |    |             |                           |      |                       |
|-------------|----|-------------|---------------------------|------|-----------------------|
| rs17218887  | 4  | 108,297,878 | Intergenic                | 0.62 | $3.25 \times 10^{-9}$ |
| rs75182356  | 4  | 128,539,231 | Intergenic                | 0.42 | $1.80 \times 10^{-8}$ |
| rs1370973   | 5  | 148,646,445 | Intergenic                | 0.48 | $5.42 \times 10^{-9}$ |
| rs10515624  | 5  | 148,646,653 | Intergenic                | 0.49 | $2.51 \times 10^{-9}$ |
| rs182201265 | 6  | 123,766,133 | <i>LOC101927990; TRDN</i> | 0.43 | $3.16 \times 10^{-8}$ |
| rs113269145 | 7  | 68,890,254  | Intergenic                | 0.48 | $3.07 \times 10^{-8}$ |
| rs79708239  | 7  | 89,153,735  | Intergenic                | 0.56 | $6.87 \times 10^{-9}$ |
| rs1988969   | 7  | 89,169,683  | Intergenic                | 0.58 | $4.19 \times 10^{-9}$ |
| rs138171318 | 7  | 89,170,544  | Intergenic                | 0.58 | $4.19 \times 10^{-9}$ |
| rs35916261  | 7  | 89,180,706  | Intergenic                | 0.58 | $4.19 \times 10^{-9}$ |
| rs13238112  | 7  | 89,208,828  | Intergenic                | 0.58 | $4.19 \times 10^{-9}$ |
| rs73162118  | 7  | 145,894,179 | <i>CNTNAP2</i>            | 0.58 | $8.12 \times 10^{-9}$ |
| rs76410706  | 8  | 134,649,307 | Intergenic                | 0.56 | $2.55 \times 10^{-8}$ |
| rs17471115  | 9  | 2,270,173   | Intergenic                | 0.45 | $3.19 \times 10^{-8}$ |
| rs188411780 | 9  | 66,293,852  | Intergenic                | 0.59 | $1.14 \times 10^{-8}$ |
| rs114512480 | 9  | 66,313,626  | Intergenic                | 0.57 | $1.25 \times 10^{-8}$ |
| rs138787382 | 9  | 66,337,862  | Intergenic                | 0.58 | $9.67 \times 10^{-9}$ |
| rs141482512 | 9  | 66,338,242  | Intergenic                | 0.59 | $5.84 \times 10^{-9}$ |
| rs146714337 | 9  | 66,342,179  | Intergenic                | 0.57 | $1.25 \times 10^{-8}$ |
| rs184956483 | 9  | 66,343,556  | Intergenic                | 0.56 | $9.76 \times 10^{-9}$ |
| rs113589188 | 9  | 101,106,072 | <i>GABBR2</i>             | 0.56 | $3.78 \times 10^{-8}$ |
| rs72759648  | 9  | 101,106,440 | <i>GABBR2</i>             | 0.56 | $3.78 \times 10^{-8}$ |
| rs147918689 | 10 | 31,390,686  | Intergenic                | 0.57 | $4.63 \times 10^{-8}$ |
| rs10733783  | 10 | 64,833,459  | Intergenic                | 0.59 | $1.36 \times 10^{-8}$ |
| rs2136577   | 10 | 64,834,514  | Intergenic                | 0.55 | $4.71 \times 10^{-8}$ |
| rs2036790   | 10 | 64,834,786  | Intergenic                | 0.57 | $2.29 \times 10^{-8}$ |
| rs1396963   | 10 | 64,835,130  | Intergenic                | 0.57 | $2.29 \times 10^{-8}$ |
| rs10761699  | 10 | 64,840,056  | Intergenic                | 0.57 | $2.29 \times 10^{-8}$ |
| rs7893891   | 10 | 64,841,660  | Intergenic                | 0.57 | $2.29 \times 10^{-8}$ |
| rs10733784  | 10 | 64,844,186  | Intergenic                | 0.57 | $2.29 \times 10^{-8}$ |
| rs10761701  | 10 | 64,846,524  | Intergenic                | 0.57 | $2.29 \times 10^{-8}$ |
| rs113745971 | 10 | 64,847,058  | Intergenic                | 0.56 | $1.18 \times 10^{-8}$ |
| rs12263266  | 10 | 64,848,863  | Intergenic                | 0.52 | $4.94 \times 10^{-8}$ |
| rs72824931  | 10 | 64,849,482  | Intergenic                | 0.52 | $4.94 \times 10^{-8}$ |
| rs7896294   | 10 | 64,986,445  | <i>JMJD1C</i>             | 0.57 | $3.05 \times 10^{-8}$ |
| rs12259115  | 10 | 64,993,101  | <i>JMJD1C</i>             | 0.57 | $3.05 \times 10^{-8}$ |
| rs7907747   | 10 | 64,993,984  | <i>JMJD1C</i>             | 0.57 | $3.05 \times 10^{-8}$ |
| rs7907993   | 10 | 64,994,157  | <i>JMJD1C</i>             | 0.57 | $3.05 \times 10^{-8}$ |
| rs6479890   | 10 | 65,000,493  | <i>JMJD1C</i>             | 0.57 | $3.05 \times 10^{-8}$ |
| rs78745769  | 10 | 72,115,208  | <i>LRRC20</i>             | 0.48 | $1.02 \times 10^{-8}$ |
| rs10823526  | 10 | 72,115,475  | <i>LRRC20</i>             | 0.50 | $4.57 \times 10^{-9}$ |
| rs10823528  | 10 | 72,115,839  | <i>LRRC20</i>             | 0.50 | $4.57 \times 10^{-9}$ |
| rs115151048 | 10 | 72,121,454  | <i>LRRC20</i>             | 0.50 | $4.57 \times 10^{-9}$ |
| rs76702380  | 10 | 72,129,054  | <i>LRRC20</i>             | 0.50 | $4.57 \times 10^{-9}$ |
| rs2127584   | 10 | 72,132,013  | <i>LRRC20</i>             | 0.50 | $4.57 \times 10^{-9}$ |
| rs45450199  | 10 | 72,182,110  | <i>EIF4EBP2</i>           | 0.51 | $1.21 \times 10^{-9}$ |
| rs72824341  | 10 | 82,313,928  | <i>SH2D4B</i>             | 0.54 | $2.33 \times 10^{-8}$ |
| rs148744689 | 10 | 82,325,879  | <i>SH2D4B</i>             | 0.53 | $2.58 \times 10^{-8}$ |
| rs146230721 | 10 | 82,346,195  | <i>SH2D4B</i>             | 0.54 | $2.07 \times 10^{-8}$ |

|              |             |    |             |               |      |                        |
|--------------|-------------|----|-------------|---------------|------|------------------------|
|              | rs192810909 | 10 | 82,346,690  | <i>SH2D4B</i> | 0.52 | $3.90 \times 10^{-8}$  |
|              | rs72805746  | 10 | 82,361,942  | <i>SH2D4B</i> | 0.51 | $3.68 \times 10^{-8}$  |
|              | rs72809868  | 10 | 83,292,537  | Intergenic    | 0.66 | $3.23 \times 10^{-10}$ |
|              | rs56121726  | 10 | 83,295,594  | Intergenic    | 0.66 | $3.23 \times 10^{-10}$ |
|              | rs59545274  | 10 | 83,314,472  | Intergenic    | 0.60 | $8.44 \times 10^{-9}$  |
|              | rs7912649   | 10 | 83,315,909  | Intergenic    | 0.61 | $9.35 \times 10^{-9}$  |
|              | rs72809901  | 10 | 83,319,884  | Intergenic    | 0.63 | $3.48 \times 10^{-9}$  |
|              | rs66584082  | 10 | 83,324,483  | Intergenic    | 0.59 | $8.72 \times 10^{-9}$  |
|              | rs72816049  | 10 | 83,351,851  | Intergenic    | 0.64 | $2.81 \times 10^{-9}$  |
|              | rs7092774   | 10 | 83,352,442  | Intergenic    | 0.64 | $2.81 \times 10^{-9}$  |
|              | rs72816051  | 10 | 83,352,644  | Intergenic    | 0.64 | $2.81 \times 10^{-9}$  |
|              | rs72816056  | 10 | 83,354,081  | Intergenic    | 0.64 | $2.81 \times 10^{-9}$  |
|              | rs72816059  | 10 | 83,355,333  | Intergenic    | 0.64 | $2.81 \times 10^{-9}$  |
|              | rs72816060  | 10 | 83,355,414  | Intergenic    | 0.64 | $2.81 \times 10^{-9}$  |
|              | rs72816064  | 10 | 83,356,665  | Intergenic    | 0.64 | $2.81 \times 10^{-9}$  |
|              | rs72816065  | 10 | 83,357,520  | Intergenic    | 0.64 | $2.81 \times 10^{-9}$  |
|              | rs78166894  | 10 | 83,358,335  | Intergenic    | 0.64 | $2.81 \times 10^{-9}$  |
|              | rs141773517 | 10 | 83,358,825  | Intergenic    | 0.64 | $2.81 \times 10^{-9}$  |
|              | rs74623904  | 10 | 83,359,635  | Intergenic    | 0.64 | $2.81 \times 10^{-9}$  |
|              | rs72816069  | 10 | 83,359,891  | Intergenic    | 0.64 | $2.81 \times 10^{-9}$  |
|              | rs72816070  | 10 | 83,360,089  | Intergenic    | 0.64 | $2.81 \times 10^{-9}$  |
|              | rs72816072  | 10 | 83,360,186  | Intergenic    | 0.64 | $2.81 \times 10^{-9}$  |
|              | rs139422498 | 10 | 83,360,572  | Intergenic    | 0.64 | $2.81 \times 10^{-9}$  |
|              | rs72816073  | 10 | 83,362,338  | Intergenic    | 0.64 | $2.81 \times 10^{-9}$  |
|              | rs72816074  | 10 | 83,362,400  | Intergenic    | 0.64 | $2.81 \times 10^{-9}$  |
|              | rs72816076  | 10 | 83,362,421  | Intergenic    | 0.64 | $2.81 \times 10^{-9}$  |
|              | rs72816078  | 10 | 83,362,599  | Intergenic    | 0.64 | $2.81 \times 10^{-9}$  |
|              | rs72816080  | 10 | 83,363,337  | Intergenic    | 0.64 | $2.81 \times 10^{-9}$  |
|              | rs72816082  | 10 | 83,363,718  | Intergenic    | 0.64 | $2.81 \times 10^{-9}$  |
|              | rs72816093  | 10 | 83,366,246  | Intergenic    | 0.62 | $6.14 \times 10^{-9}$  |
|              | rs117640372 | 10 | 83,369,504  | Intergenic    | 0.58 | $1.98 \times 10^{-8}$  |
|              | rs56356362  | 10 | 83,371,521  | Intergenic    | 0.64 | $2.90 \times 10^{-9}$  |
|              | rs72817825  | 10 | 83,374,827  | Intergenic    | 0.55 | $4.22 \times 10^{-8}$  |
|              | rs151176250 | 10 | 83,376,295  | Intergenic    | 0.62 | $4.71 \times 10^{-9}$  |
|              | rs183456282 | 10 | 83,395,561  | Intergenic    | 0.64 | $1.94 \times 10^{-9}$  |
|              | rs4586108   | 11 | 26,765,167  | Intergenic    | 0.46 | $1.14 \times 10^{-8}$  |
|              | rs10466389  | 11 | 26,771,716  | Intergenic    | 0.45 | $1.32 \times 10^{-8}$  |
|              | rs74459769  | 11 | 95,987,098  | <i>MAML2</i>  | 0.52 | $3.18 \times 10^{-8}$  |
|              | rs2076799   | 13 | 36,721,182  | Intergenic    | 0.56 | $4.27 \times 10^{-8}$  |
|              | rs2322894   | 13 | 36,736,922  | Intergenic    | 0.56 | $4.54 \times 10^{-8}$  |
|              | rs1410636   | 13 | 36,737,086  | Intergenic    | 0.56 | $4.54 \times 10^{-8}$  |
|              | rs1410635   | 13 | 36,737,113  | Intergenic    | 0.56 | $4.54 \times 10^{-8}$  |
|              | rs1898283   | 13 | 53,229,252  | <i>SUGT1</i>  | 0.57 | $9.54 \times 10^{-9}$  |
|              | rs181119556 | 15 | 20,760,461  | Intergenic    | 0.53 | $2.85 \times 10^{-10}$ |
|              | rs12149512  | 16 | 4,227,505   | Intergenic    | 0.57 | $1.65 \times 10^{-8}$  |
|              | rs12324980  | 16 | 4,250,114   | <i>SRL</i>    | 0.58 | $1.62 \times 10^{-8}$  |
|              | rs17136871  | 16 | 4,252,645   | <i>SRL</i>    | 0.56 | $3.78 \times 10^{-8}$  |
| <i>LPAR5</i> | rs191981859 | 11 | 116,809,251 | <i>SIK3</i>   | 1.01 | $2.12 \times 10^{-8}$  |
| <i>MAPK1</i> | rs72861432  | 11 | 13,187,603  | Intergenic    | 5.99 | $3.42 \times 10^{-8}$  |

|             |             |    |             |                 |      |                        |
|-------------|-------------|----|-------------|-----------------|------|------------------------|
| <i>MET</i>  | rs73184769  | 3  | 175,061,183 | <i>NAALADL2</i> | 0.04 | $1.13 \times 10^{-8}$  |
|             | rs149410839 | 3  | 180,153,254 | Intergenic      | 0.07 | $6.11 \times 10^{-9}$  |
|             | rs17339635  | 10 | 14,487,154  | Intergenic      | 0.06 | $4.56 \times 10^{-8}$  |
|             | rs146615136 | 13 | 22,028,207  | <i>ZDHHC20</i>  | 0.06 | $3.94 \times 10^{-8}$  |
|             | rs73159315  | 22 | 39,213,327  | Intergenic      | 0.05 | $2.72 \times 10^{-8}$  |
| <i>MTOR</i> | rs74327628  | 4  | 42,196,927  | Intergenic      | 9.57 | $9.49 \times 10^{-9}$  |
|             | rs111501395 | 4  | 42,197,378  | Intergenic      | 9.57 | $9.49 \times 10^{-9}$  |
| <i>MYB</i>  | rs148283323 | 1  | 24,329,617  | Intergenic      | 2.97 | $1.03 \times 10^{-9}$  |
|             | rs147880708 | 1  | 73,704,258  | Intergenic      | 2.88 | $1.44 \times 10^{-8}$  |
|             | rs61469378  | 1  | 85,331,918  | <i>LPAR3</i>    | 3.06 | $7.55 \times 10^{-10}$ |
|             | rs787148    | 2  | 144,663,911 | Intergenic      | 2.15 | $4.66 \times 10^{-8}$  |
|             | rs78148102  | 2  | 159,819,408 | Intergenic      | 2.62 | $1.62 \times 10^{-8}$  |
|             | rs842073    | 2  | 159,824,573 | Intergenic      | 2.60 | $1.56 \times 10^{-8}$  |
|             | rs1719079   | 2  | 159,841,372 | <i>TANCI</i>    | 2.60 | $1.56 \times 10^{-8}$  |
|             | rs264599    | 2  | 159,882,085 | <i>TANCI</i>    | 2.60 | $1.56 \times 10^{-8}$  |
|             | rs77910980  | 2  | 159,882,854 | <i>TANCI</i>    | 2.60 | $1.56 \times 10^{-8}$  |
|             | rs77137053  | 2  | 159,921,122 | <i>TANCI</i>    | 2.78 | $5.01 \times 10^{-9}$  |
|             | rs147441210 | 4  | 9,003,867   | Intergenic      | 2.77 | $3.35 \times 10^{-8}$  |
|             | rs144540401 | 4  | 29,216,658  | Intergenic      | 2.82 | $4.72 \times 10^{-8}$  |
|             | rs72910722  | 6  | 85,422,673  | Intergenic      | 2.76 | $2.76 \times 10^{-8}$  |
|             | rs12215883  | 6  | 85,423,614  | Intergenic      | 2.76 | $2.76 \times 10^{-8}$  |
|             | rs184854229 | 7  | 37,773      | Intergenic      | 2.72 | $3.47 \times 10^{-8}$  |
|             | rs150989719 | 7  | 387,508     | Intergenic      | 2.68 | $4.28 \times 10^{-8}$  |
|             | rs149979215 | 7  | 481,372     | Intergenic      | 2.39 | $2.18 \times 10^{-8}$  |
|             | rs992616    | 8  | 17,996,141  | Intergenic      | 2.64 | $2.75 \times 10^{-8}$  |
|             | rs1858723   | 8  | 17,996,624  | Intergenic      | 2.64 | $2.75 \times 10^{-8}$  |
|             | rs75291628  | 8  | 20,729,845  | Intergenic      | 2.77 | $1.59 \times 10^{-8}$  |
|             | rs117281412 | 8  | 20,732,974  | Intergenic      | 2.77 | $1.59 \times 10^{-8}$  |
|             | rs79261861  | 8  | 20,734,514  | Intergenic      | 2.77 | $1.59 \times 10^{-8}$  |
|             | rs17361080  | 8  | 35,999,348  | Intergenic      | 2.74 | $4.17 \times 10^{-8}$  |
|             | rs182250531 | 8  | 52,338,369  | <i>PXDNL</i>    | 2.82 | $2.70 \times 10^{-8}$  |
|             | rs17720343  | 8  | 70,509,789  | <i>SULF1</i>    | 2.46 | $4.06 \times 10^{-8}$  |
|             | rs11015813  | 10 | 27,774,276  | Intergenic      | 2.89 | $3.21 \times 10^{-8}$  |
|             | rs11015814  | 10 | 27,774,832  | Intergenic      | 2.89 | $3.21 \times 10^{-8}$  |
|             | rs61285402  | 10 | 27,776,827  | Intergenic      | 2.89 | $3.21 \times 10^{-8}$  |
|             | rs74969813  | 10 | 27,839,861  | Intergenic      | 2.89 | $3.21 \times 10^{-8}$  |
|             | rs11015874  | 10 | 27,850,032  | Intergenic      | 2.89 | $3.34 \times 10^{-8}$  |
|             | rs11015880  | 10 | 27,861,452  | Intergenic      | 2.93 | $2.24 \times 10^{-8}$  |
|             | rs78740100  | 10 | 53,831,221  | <i>PRKGI</i>    | 2.80 | $7.14 \times 10^{-9}$  |
|             | rs11227408  | 11 | 65,868,971  | <i>PACSI</i>    | 2.80 | $3.26 \times 10^{-8}$  |
|             | rs7134150   | 12 | 20,591,332  | <i>PDE3A</i>    | 2.67 | $2.03 \times 10^{-8}$  |
|             | rs73239573  | 12 | 20,592,268  | <i>PDE3A</i>    | 3.00 | $1.50 \times 10^{-9}$  |
|             | rs11045247  | 12 | 20,592,624  | <i>PDE3A</i>    | 2.57 | $1.66 \times 10^{-8}$  |
|             | rs12314390  | 12 | 20,597,977  | <i>PDE3A</i>    | 3.03 | $1.38 \times 10^{-9}$  |
|             | rs117857467 | 17 | 41,836,456  | Intergenic      | 2.76 | $3.75 \times 10^{-9}$  |
|             | rs62078607  | 17 | 41,848,271  | <i>DUSP3</i>    | 2.70 | $5.80 \times 10^{-9}$  |
|             | rs192299491 | 17 | 43,560,815  | <i>PLEKHM1</i>  | 2.79 | $3.00 \times 10^{-9}$  |
|             | rs71358642  | 18 | 62,485,590  | Intergenic      | 2.69 | $1.59 \times 10^{-8}$  |
|             | rs71366981  | 18 | 62,489,177  | Intergenic      | 2.69 | $1.59 \times 10^{-8}$  |

|              |             |    |             |                |       |                       |
|--------------|-------------|----|-------------|----------------|-------|-----------------------|
|              | rs12966734  | 18 | 62,492,981  | Intergenic     | 2.49  | $2.66 \times 10^{-8}$ |
|              | rs112779919 | 21 | 44,024,054  | Intergenic     | 3.00  | $2.02 \times 10^{-9}$ |
| <i>NGFR</i>  | rs181198447 | 5  | 154,659,520 | Intergenic     | 0.10  | $2.13 \times 10^{-8}$ |
| <i>NR4A1</i> | rs17570382  | 15 | 38,572,996  | <i>SPRED1</i>  | 1.66  | $2.88 \times 10^{-8}$ |
| <i>PCK1</i>  | rs12122364  | 1  | 67,361,195  | <i>WDR78</i>   | 0.03  | $5.16 \times 10^{-9}$ |
|              | rs56193101  | 6  | 151,263,035 | <i>MTHFD1L</i> | 0.03  | $3.85 \times 10^{-8}$ |
| <i>PDGFA</i> | rs13147782  | 4  | 131,034,260 | Intergenic     | 3.95  | $1.02 \times 10^{-8}$ |
|              | rs10425914  | 19 | 35,952,955  | Intergenic     | 3.97  | $2.18 \times 10^{-9}$ |
| <i>PDGFB</i> | rs5757584   | 22 | 39,662,550  | Intergenic     | -0.44 | $2.34 \times 10^{-8}$ |
|              | rs5757585   | 22 | 39,663,185  | Intergenic     | -0.44 | $2.18 \times 10^{-8}$ |
|              | rs5757587   | 22 | 39,663,513  | Intergenic     | -0.45 | $5.17 \times 10^{-9}$ |
|              | rs5750784   | 22 | 39,664,180  | Intergenic     | -0.45 | $3.93 \times 10^{-9}$ |
|              | rs1569495   | 22 | 39,665,142  | Intergenic     | -0.45 | $3.93 \times 10^{-9}$ |
|              | rs5757590   | 22 | 39,668,409  | Intergenic     | -0.45 | $3.93 \times 10^{-9}$ |
|              | rs968451    | 22 | 39,670,851  | Intergenic     | -0.45 | $4.25 \times 10^{-9}$ |
|              | rs5750785   | 22 | 39,671,141  | Intergenic     | -0.45 | $4.67 \times 10^{-9}$ |
|              | rs5757601   | 22 | 39,671,534  | Intergenic     | -0.46 | $3.57 \times 10^{-9}$ |
|              | rs17000962  | 22 | 39,680,187  | Intergenic     | -0.45 | $4.38 \times 10^{-9}$ |
|              | rs12628705  | 22 | 39,693,518  | Intergenic     | -0.44 | $1.00 \times 10^{-8}$ |
|              | rs11704615  | 22 | 39,696,834  | Intergenic     | -0.44 | $1.24 \times 10^{-8}$ |
|              | rs57078777  | 22 | 39,697,458  | Intergenic     | -0.44 | $1.24 \times 10^{-8}$ |
|              | rs11703434  | 22 | 39,698,915  | Intergenic     | -0.44 | $1.24 \times 10^{-8}$ |
|              | rs11704385  | 22 | 39,700,994  | Intergenic     | -0.43 | $1.61 \times 10^{-8}$ |
|              | rs62228376  | 22 | 39,701,097  | Intergenic     | -0.44 | $1.24 \times 10^{-8}$ |
|              | rs75712317  | 22 | 39,701,165  | Intergenic     | -0.44 | $1.00 \times 10^{-8}$ |
|              | rs62228377  | 22 | 39,701,703  | Intergenic     | -0.45 | $4.25 \times 10^{-8}$ |
|              | rs971964    | 22 | 39,702,473  | Intergenic     | -0.44 | $1.24 \times 10^{-8}$ |
|              | rs5757609   | 22 | 39,707,845  | Intergenic     | -0.43 | $6.58 \times 10^{-9}$ |
|              | rs5757610   | 22 | 39,707,979  | Intergenic     | -0.43 | $6.58 \times 10^{-9}$ |
|              | rs5757611   | 22 | 39,708,357  | Intergenic     | -0.43 | $6.58 \times 10^{-9}$ |
|              | rs2076125   | 22 | 39,711,351  | <i>RPL3</i>    | -0.43 | $6.58 \times 10^{-9}$ |
|              | rs2007418   | 22 | 39,712,394  | <i>RPL3</i>    | -0.43 | $6.58 \times 10^{-9}$ |
|              | rs12628367  | 22 | 39,717,104  | Intergenic     | -0.42 | $1.21 \times 10^{-8}$ |
|              | rs5757614   | 22 | 39,717,554  | Intergenic     | -0.43 | $6.58 \times 10^{-9}$ |
|              | rs12627970  | 22 | 39,721,745  | Intergenic     | -0.43 | $6.58 \times 10^{-9}$ |
|              | rs12627761  | 22 | 39,724,137  | Intergenic     | -0.43 | $6.58 \times 10^{-9}$ |
|              | rs5757618   | 22 | 39,724,551  | Intergenic     | -0.43 | $6.58 \times 10^{-9}$ |
|              | rs5757619   | 22 | 39,724,558  | Intergenic     | -0.43 | $6.58 \times 10^{-9}$ |
|              | rs5750789   | 22 | 39,725,280  | Intergenic     | -0.43 | $2.60 \times 10^{-8}$ |
|              | rs5757622   | 22 | 39,728,861  | Intergenic     | -0.43 | $2.60 \times 10^{-8}$ |
|              | rs28591484  | 22 | 39,729,249  | Intergenic     | -0.43 | $2.60 \times 10^{-8}$ |
|              | rs62228404  | 22 | 39,730,795  | Intergenic     | -0.43 | $2.60 \times 10^{-8}$ |
|              | rs12163078  | 22 | 39,731,680  | Intergenic     | -0.43 | $2.60 \times 10^{-8}$ |
|              | rs12627838  | 22 | 39,733,521  | Intergenic     | -0.43 | $2.60 \times 10^{-8}$ |
|              | rs5757624   | 22 | 39,737,350  | Intergenic     | -0.43 | $2.60 \times 10^{-8}$ |
|              | rs5757625   | 22 | 39,738,243  | Intergenic     | -0.44 | $1.06 \times 10^{-8}$ |
|              | rs74804869  | 22 | 39,741,840  | Intergenic     | -0.41 | $6.09 \times 10^{-9}$ |
|              | rs3747177   | 22 | 39,746,168  | <i>SYNGR1</i>  | -0.42 | $4.60 \times 10^{-9}$ |
|              | rs2267407   | 22 | 39,747,050  | <i>SYNGR1</i>  | -0.41 | $4.77 \times 10^{-9}$ |

|               |             |    |             |                     |       |                        |
|---------------|-------------|----|-------------|---------------------|-------|------------------------|
|               | rs1807560   | 22 | 39,748,912  | <i>SYNGR1</i>       | -0.42 | $4.60 \times 10^{-9}$  |
|               | rs5757628   | 22 | 39,749,981  | <i>SYNGR1</i>       | -0.42 | $2.77 \times 10^{-9}$  |
|               | rs715505    | 22 | 39,751,251  | <i>SYNGR1</i>       | -0.41 | $6.48 \times 10^{-9}$  |
|               | rs61616683  | 22 | 39,755,773  | <i>SYNGR1</i>       | -0.42 | $2.77 \times 10^{-9}$  |
|               | rs2049985   | 22 | 39,756,650  | <i>SYNGR1</i>       | -0.42 | $2.77 \times 10^{-9}$  |
| <i>PDGFRA</i> | rs2071997   | 1  | 4,758,169   | <i>AJAPI</i>        | 0.94  | $2.99 \times 10^{-9}$  |
|               | rs72638828  | 1  | 4,767,563   | <i>AJAPI</i>        | 0.88  | $1.20 \times 10^{-8}$  |
|               | rs77713630  | 1  | 13,932,387  | <i>PDPN</i>         | 0.83  | $4.07 \times 10^{-8}$  |
|               | rs55965106  | 1  | 30,661,274  | Intergenic          | 0.85  | $1.09 \times 10^{-8}$  |
|               | rs115303998 | 1  | 38,475,505  | Intergenic          | 0.85  | $4.44 \times 10^{-8}$  |
|               | rs12067225  | 1  | 38,483,498  | <i>UTP11L</i>       | 0.95  | $5.75 \times 10^{-9}$  |
|               | rs12083739  | 1  | 38,497,969  | Intergenic          | 0.95  | $5.75 \times 10^{-9}$  |
|               | rs16824560  | 1  | 38,502,279  | Intergenic          | 0.95  | $5.75 \times 10^{-9}$  |
|               | rs12093705  | 1  | 38,502,404  | Intergenic          | 0.95  | $5.75 \times 10^{-9}$  |
|               | rs77019850  | 1  | 38,506,265  | Intergenic          | 0.95  | $5.75 \times 10^{-9}$  |
|               | rs112597088 | 1  | 38,506,725  | Intergenic          | 0.95  | $5.75 \times 10^{-9}$  |
|               | rs77878024  | 1  | 38,507,033  | Intergenic          | 0.95  | $5.75 \times 10^{-9}$  |
|               | rs78118424  | 1  | 38,507,180  | Intergenic          | 0.95  | $5.75 \times 10^{-9}$  |
|               | rs77098561  | 1  | 38,507,323  | Intergenic          | 0.95  | $5.75 \times 10^{-9}$  |
|               | rs78948181  | 1  | 38,507,441  | Intergenic          | 0.95  | $5.75 \times 10^{-9}$  |
|               | rs12095900  | 1  | 38,508,795  | Intergenic          | 0.95  | $5.75 \times 10^{-9}$  |
|               | rs12091855  | 1  | 38,508,948  | Intergenic          | 0.95  | $5.75 \times 10^{-9}$  |
|               | rs75290293  | 1  | 38,514,645  | Intergenic          | 0.95  | $5.75 \times 10^{-9}$  |
|               | rs12093120  | 1  | 38,515,266  | Intergenic          | 0.95  | $5.75 \times 10^{-9}$  |
|               | rs75320540  | 1  | 38,516,381  | Intergenic          | 0.95  | $5.75 \times 10^{-9}$  |
|               | rs12058961  | 1  | 38,517,310  | Intergenic          | 0.95  | $5.75 \times 10^{-9}$  |
|               | rs12095995  | 1  | 38,517,347  | Intergenic          | 0.95  | $5.75 \times 10^{-9}$  |
|               | rs147391979 | 1  | 47,635,349  | Intergenic          | 0.89  | $9.47 \times 10^{-9}$  |
|               | rs74754244  | 1  | 60,244,994  | <i>LOC101926944</i> | 0.93  | $2.49 \times 10^{-9}$  |
|               | rs11208345  | 1  | 64,518,525  | <i>ROR1</i>         | 0.86  | $2.93 \times 10^{-8}$  |
|               | rs17557128  | 1  | 71,643,690  | <i>ZRANB2-AS2</i>   | 0.94  | $3.66 \times 10^{-9}$  |
|               | rs17560420  | 1  | 71,835,333  | Intergenic          | 1.01  | $7.91 \times 10^{-10}$ |
|               | rs34898186  | 1  | 81,146,298  | Intergenic          | 0.89  | $5.47 \times 10^{-9}$  |
|               | rs148110752 | 1  | 85,653,530  | <i>SYDE2</i>        | 0.85  | $1.22 \times 10^{-8}$  |
|               | rs7542970   | 1  | 99,907,647  | Intergenic          | 0.90  | $1.26 \times 10^{-8}$  |
|               | rs17646665  | 1  | 109,912,051 | <i>SORT1</i>        | 1.00  | $5.06 \times 10^{-10}$ |
|               | rs2272272   | 1  | 110,009,802 | <i>SYPL2</i>        | 0.97  | $1.39 \times 10^{-9}$  |
|               | rs56018934  | 1  | 110,060,710 | Intergenic          | 0.97  | $1.53 \times 10^{-9}$  |
|               | rs56074066  | 1  | 153,472,415 | Intergenic          | 0.83  | $1.92 \times 10^{-8}$  |
|               | rs7535476   | 1  | 153,514,241 | <i>S100A5</i>       | 0.88  | $1.43 \times 10^{-8}$  |
|               | rs1810765   | 1  | 153,515,120 | Intergenic          | 0.86  | $2.30 \times 10^{-8}$  |
|               | rs743687    | 1  | 153,515,525 | Intergenic          | 0.86  | $2.30 \times 10^{-8}$  |
|               | rs9660389   | 1  | 153,582,067 | <i>S100A16</i>      | 1.00  | $7.85 \times 10^{-10}$ |
|               | rs9660416   | 1  | 153,582,264 | <i>S100A16</i>      | 1.00  | $7.85 \times 10^{-10}$ |
|               | rs9728059   | 1  | 153,594,644 | <i>S100A13</i>      | 0.92  | $4.65 \times 10^{-9}$  |
|               | rs9728400   | 1  | 153,595,056 | <i>S100A13</i>      | 0.90  | $6.55 \times 10^{-9}$  |
|               | rs61805740  | 1  | 153,607,004 | <i>CHTOP</i>        | 0.99  | $1.12 \times 10^{-9}$  |
|               | rs10158761  | 1  | 153,611,426 | <i>CHTOP</i>        | 0.99  | $1.12 \times 10^{-9}$  |
|               | rs7549308   | 1  | 153,614,712 | <i>CHTOP</i>        | 0.99  | $1.12 \times 10^{-9}$  |

|             |   |             |               |      |                       |
|-------------|---|-------------|---------------|------|-----------------------|
| rs12750815  | 1 | 200,624,809 | <i>DDX59</i>  | 0.90 | $5.88 \times 10^{-9}$ |
| rs34810707  | 1 | 222,950,692 | Intergenic    | 0.80 | $3.28 \times 10^{-8}$ |
| rs59287052  | 1 | 229,100,798 | Intergenic    | 0.85 | $1.17 \times 10^{-8}$ |
| rs7546521   | 1 | 229,103,599 | Intergenic    | 0.85 | $1.59 \times 10^{-8}$ |
| rs7546906   | 1 | 229,103,917 | Intergenic    | 0.85 | $1.59 \times 10^{-8}$ |
| rs12081816  | 1 | 229,104,679 | Intergenic    | 0.85 | $1.59 \times 10^{-8}$ |
| rs12086691  | 1 | 229,105,052 | Intergenic    | 0.85 | $1.59 \times 10^{-8}$ |
| rs61825064  | 1 | 229,105,822 | Intergenic    | 0.81 | $4.66 \times 10^{-8}$ |
| rs61825065  | 1 | 229,106,506 | Intergenic    | 0.81 | $4.17 \times 10^{-8}$ |
| rs61825066  | 1 | 229,106,644 | Intergenic    | 0.81 | $4.17 \times 10^{-8}$ |
| rs7513940   | 1 | 229,107,279 | Intergenic    | 0.81 | $4.17 \times 10^{-8}$ |
| rs111795175 | 1 | 229,107,829 | Intergenic    | 0.81 | $4.17 \times 10^{-8}$ |
| rs61825067  | 1 | 229,108,057 | Intergenic    | 0.81 | $4.17 \times 10^{-8}$ |
| rs61825068  | 1 | 229,108,108 | Intergenic    | 0.81 | $4.17 \times 10^{-8}$ |
| rs61825070  | 1 | 229,108,414 | Intergenic    | 0.81 | $4.17 \times 10^{-8}$ |
| rs145447338 | 1 | 237,493,720 | <i>RYR2</i>   | 0.83 | $3.48 \times 10^{-8}$ |
| rs72766846  | 1 | 242,752,720 | Intergenic    | 0.88 | $9.40 \times 10^{-9}$ |
| rs6734056   | 2 | 1,815,366   | <i>MYTIL</i>  | 0.90 | $3.46 \times 10^{-8}$ |
| rs113087455 | 2 | 3,720,117   | <i>ALLC</i>   | 0.86 | $1.82 \times 10^{-9}$ |
| rs184609957 | 2 | 57,418,227  | Intergenic    | 0.80 | $1.34 \times 10^{-8}$ |
| rs62150097  | 2 | 72,392,916  | Intergenic    | 0.91 | $1.37 \times 10^{-8}$ |
| rs57013742  | 2 | 72,401,702  | Intergenic    | 0.95 | $5.69 \times 10^{-9}$ |
| rs62150118  | 2 | 72,404,853  | Intergenic    | 0.91 | $1.37 \times 10^{-8}$ |
| rs62150119  | 2 | 72,407,793  | <i>EXOC6B</i> | 0.91 | $1.37 \times 10^{-8}$ |
| rs62150120  | 2 | 72,411,493  | <i>EXOC6B</i> | 0.88 | $3.21 \times 10^{-8}$ |
| rs17007927  | 2 | 72,413,594  | <i>EXOC6B</i> | 0.88 | $3.21 \times 10^{-8}$ |
| rs6748698   | 2 | 72,414,107  | <i>EXOC6B</i> | 0.88 | $3.21 \times 10^{-8}$ |
| rs6705261   | 2 | 72,414,565  | <i>EXOC6B</i> | 0.88 | $3.21 \times 10^{-8}$ |
| rs6705347   | 2 | 72,414,575  | <i>EXOC6B</i> | 0.88 | $3.21 \times 10^{-8}$ |
| rs58339219  | 2 | 72,415,328  | <i>EXOC6B</i> | 0.88 | $3.21 \times 10^{-8}$ |
| rs62150123  | 2 | 72,416,709  | <i>EXOC6B</i> | 0.86 | $4.37 \times 10^{-8}$ |
| rs55813510  | 2 | 72,417,191  | <i>EXOC6B</i> | 0.88 | $3.21 \times 10^{-8}$ |
| rs17007929  | 2 | 72,418,724  | <i>EXOC6B</i> | 0.88 | $3.21 \times 10^{-8}$ |
| rs13339845  | 2 | 72,419,864  | <i>EXOC6B</i> | 0.88 | $3.21 \times 10^{-8}$ |
| rs17007933  | 2 | 72,420,151  | <i>EXOC6B</i> | 0.88 | $3.21 \times 10^{-8}$ |
| rs17007934  | 2 | 72,424,769  | <i>EXOC6B</i> | 0.91 | $1.37 \times 10^{-8}$ |
| rs55994075  | 2 | 72,425,112  | <i>EXOC6B</i> | 0.91 | $1.37 \times 10^{-8}$ |
| rs6707549   | 2 | 72,427,119  | <i>EXOC6B</i> | 0.88 | $3.21 \times 10^{-8}$ |
| rs10490039  | 2 | 72,429,239  | <i>EXOC6B</i> | 0.88 | $3.21 \times 10^{-8}$ |
| rs17007937  | 2 | 72,432,759  | <i>EXOC6B</i> | 0.91 | $1.37 \times 10^{-8}$ |
| rs2192012   | 2 | 72,433,660  | <i>EXOC6B</i> | 0.91 | $1.37 \times 10^{-8}$ |
| rs72910329  | 2 | 72,436,567  | <i>EXOC6B</i> | 0.91 | $1.37 \times 10^{-8}$ |
| rs72910330  | 2 | 72,437,144  | <i>EXOC6B</i> | 0.91 | $1.37 \times 10^{-8}$ |
| rs62147574  | 2 | 72,437,602  | <i>EXOC6B</i> | 0.91 | $1.37 \times 10^{-8}$ |
| rs58032693  | 2 | 72,439,600  | <i>EXOC6B</i> | 0.91 | $1.37 \times 10^{-8}$ |
| rs58173605  | 2 | 72,439,951  | <i>EXOC6B</i> | 0.91 | $1.37 \times 10^{-8}$ |
| rs61391258  | 2 | 72,440,145  | <i>EXOC6B</i> | 0.91 | $1.37 \times 10^{-8}$ |
| rs62147580  | 2 | 72,441,356  | <i>EXOC6B</i> | 0.91 | $1.37 \times 10^{-8}$ |
| rs62147581  | 2 | 72,441,476  | <i>EXOC6B</i> | 0.85 | $3.89 \times 10^{-8}$ |

|             |   |             |                |      |                        |
|-------------|---|-------------|----------------|------|------------------------|
| rs62147586  | 2 | 72,447,285  | <i>EXOC6B</i>  | 0.95 | $5.69 \times 10^{-9}$  |
| rs72910350  | 2 | 72,448,427  | <i>EXOC6B</i>  | 0.91 | $1.37 \times 10^{-8}$  |
| rs10490040  | 2 | 72,449,443  | <i>EXOC6B</i>  | 0.91 | $1.37 \times 10^{-8}$  |
| rs62147587  | 2 | 72,449,468  | <i>EXOC6B</i>  | 0.95 | $5.69 \times 10^{-9}$  |
| rs62147588  | 2 | 72,449,484  | <i>EXOC6B</i>  | 0.95 | $5.69 \times 10^{-9}$  |
| rs62147590  | 2 | 72,451,666  | <i>EXOC6B</i>  | 0.95 | $5.69 \times 10^{-9}$  |
| rs1002415   | 2 | 72,455,057  | <i>EXOC6B</i>  | 0.93 | $6.83 \times 10^{-9}$  |
| rs13389007  | 2 | 72,455,964  | <i>EXOC6B</i>  | 0.95 | $5.69 \times 10^{-9}$  |
| rs59269913  | 2 | 72,457,217  | <i>EXOC6B</i>  | 0.95 | $5.69 \times 10^{-9}$  |
| rs56152907  | 2 | 72,459,305  | <i>EXOC6B</i>  | 0.95 | $5.69 \times 10^{-9}$  |
| rs62147598  | 2 | 72,459,614  | <i>EXOC6B</i>  | 0.95 | $5.69 \times 10^{-9}$  |
| rs77024759  | 2 | 72,461,309  | <i>EXOC6B</i>  | 0.95 | $5.69 \times 10^{-9}$  |
| rs62147600  | 2 | 72,461,497  | <i>EXOC6B</i>  | 0.95 | $5.69 \times 10^{-9}$  |
| rs62147601  | 2 | 72,463,898  | <i>EXOC6B</i>  | 0.95 | $5.69 \times 10^{-9}$  |
| rs62147622  | 2 | 72,466,296  | <i>EXOC6B</i>  | 0.95 | $5.69 \times 10^{-9}$  |
| rs62147623  | 2 | 72,467,134  | <i>EXOC6B</i>  | 0.95 | $5.69 \times 10^{-9}$  |
| rs62147624  | 2 | 72,471,378  | <i>EXOC6B</i>  | 0.95 | $5.69 \times 10^{-9}$  |
| rs62147625  | 2 | 72,471,453  | <i>EXOC6B</i>  | 0.95 | $5.69 \times 10^{-9}$  |
| rs10171231  | 2 | 72,480,536  | <i>EXOC6B</i>  | 0.92 | $9.52 \times 10^{-9}$  |
| rs62147627  | 2 | 72,485,205  | <i>EXOC6B</i>  | 0.92 | $9.52 \times 10^{-9}$  |
| rs62147630  | 2 | 72,489,047  | <i>EXOC6B</i>  | 0.92 | $9.52 \times 10^{-9}$  |
| rs62147631  | 2 | 72,492,585  | <i>EXOC6B</i>  | 0.90 | $1.16 \times 10^{-8}$  |
| rs61450122  | 2 | 72,495,697  | <i>EXOC6B</i>  | 0.92 | $9.52 \times 10^{-9}$  |
| rs62147637  | 2 | 72,500,268  | <i>EXOC6B</i>  | 0.92 | $9.52 \times 10^{-9}$  |
| rs62149279  | 2 | 72,558,981  | <i>EXOC6B</i>  | 0.91 | $1.16 \times 10^{-8}$  |
| rs62149280  | 2 | 72,559,455  | <i>EXOC6B</i>  | 0.93 | $6.07 \times 10^{-9}$  |
| rs62149330  | 2 | 72,704,811  | <i>EXOC6B</i>  | 0.95 | $5.52 \times 10^{-9}$  |
| rs62149336  | 2 | 72,745,105  | <i>EXOC6B</i>  | 0.91 | $9.15 \times 10^{-9}$  |
| rs189988206 | 2 | 108,346,116 | Intergenic     | 0.88 | $1.10 \times 10^{-8}$  |
| rs142867749 | 2 | 121,499,447 | Intergenic     | 0.84 | $1.45 \times 10^{-8}$  |
| rs78683586  | 2 | 121,520,061 | Intergenic     | 0.85 | $1.48 \times 10^{-8}$  |
| rs707493    | 2 | 121,521,899 | Intergenic     | 0.83 | $2.71 \times 10^{-8}$  |
| rs112657232 | 2 | 146,069,157 | Intergenic     | 0.93 | $7.75 \times 10^{-10}$ |
| rs76591903  | 2 | 164,613,084 | Intergenic     | 0.93 | $3.18 \times 10^{-9}$  |
| rs77276463  | 2 | 164,650,836 | Intergenic     | 0.92 | $4.16 \times 10^{-9}$  |
| rs77202089  | 2 | 213,767,601 | Intergenic     | 0.85 | $3.29 \times 10^{-8}$  |
| rs116802361 | 2 | 213,770,479 | Intergenic     | 0.86 | $4.15 \times 10^{-8}$  |
| rs7605968   | 2 | 217,843,682 | Intergenic     | 0.89 | $2.33 \times 10^{-8}$  |
| rs78077388  | 2 | 231,428,377 | Intergenic     | 0.97 | $1.69 \times 10^{-9}$  |
| rs80032159  | 2 | 231,430,248 | Intergenic     | 0.97 | $1.69 \times 10^{-9}$  |
| rs6707287   | 2 | 237,539,157 | Intergenic     | 0.80 | $2.50 \times 10^{-8}$  |
| rs143049900 | 3 | 29,401,020  | <i>RBMS3</i>   | 0.81 | $1.12 \times 10^{-8}$  |
| rs191333741 | 3 | 32,007,446  | <i>OSBPL10</i> | 0.81 | $1.82 \times 10^{-8}$  |
| rs112887771 | 3 | 33,749,936  | <i>CLASP2</i>  | 0.89 | $1.57 \times 10^{-8}$  |
| rs62245694  | 3 | 65,850,448  | <i>MAGII</i>   | 0.87 | $2.30 \times 10^{-8}$  |
| rs78486318  | 3 | 123,414,202 | <i>MYLK</i>    | 0.79 | $3.79 \times 10^{-8}$  |
| rs79737758  | 3 | 127,033,722 | Intergenic     | 0.84 | $3.00 \times 10^{-8}$  |
| rs111433903 | 3 | 185,588,107 | Intergenic     | 0.84 | $1.16 \times 10^{-8}$  |
| rs55639153  | 3 | 192,867,905 | Intergenic     | 0.82 | $2.17 \times 10^{-8}$  |



|             |   |             |                 |      |                        |
|-------------|---|-------------|-----------------|------|------------------------|
| rs73196836  | 3 | 192,897,226 | Intergenic      | 0.81 | $2.55 \times 10^{-8}$  |
| rs9680912   | 3 | 197,845,233 | Intergenic      | 0.91 | $2.27 \times 10^{-9}$  |
| rs13140818  | 4 | 30,837,989  | <i>PCDH7</i>    | 0.96 | $2.47 \times 10^{-9}$  |
| rs34547954  | 4 | 30,844,667  | <i>PCDH7</i>    | 0.96 | $2.47 \times 10^{-9}$  |
| rs56398319  | 4 | 45,671,692  | Intergenic      | 0.87 | $1.90 \times 10^{-8}$  |
| rs116590395 | 4 | 45,697,173  | Intergenic      | 0.84 | $3.07 \times 10^{-8}$  |
| rs74951460  | 4 | 45,754,024  | Intergenic      | 0.99 | $9.15 \times 10^{-10}$ |
| rs79977543  | 4 | 45,769,176  | Intergenic      | 0.97 | $9.70 \times 10^{-10}$ |
| rs17638375  | 4 | 45,777,947  | Intergenic      | 0.97 | $9.70 \times 10^{-10}$ |
| rs148521262 | 4 | 46,215,849  | Intergenic      | 0.80 | $4.25 \times 10^{-8}$  |
| rs114372540 | 4 | 46,297,741  | <i>GABRA2</i>   | 0.85 | $1.75 \times 10^{-8}$  |
| rs75533665  | 4 | 46,308,231  | <i>GABRA2</i>   | 0.85 | $1.75 \times 10^{-8}$  |
| rs78659165  | 4 | 46,336,973  | <i>GABRA2</i>   | 0.85 | $1.75 \times 10^{-8}$  |
| rs17537359  | 4 | 46,341,106  | <i>GABRA2</i>   | 0.85 | $1.75 \times 10^{-8}$  |
| rs79854595  | 4 | 46,374,069  | <i>GABRA2</i>   | 0.95 | $3.39 \times 10^{-9}$  |
| rs111660079 | 4 | 71,703,200  | <i>GRSFI</i>    | 0.87 | $7.26 \times 10^{-9}$  |
| rs79117691  | 4 | 71,810,431  | <i>MOB1B</i>    | 0.86 | $9.57 \times 10^{-9}$  |
| rs79509453  | 4 | 75,280,269  | Intergenic      | 0.83 | $3.34 \times 10^{-8}$  |
| rs75779450  | 4 | 75,281,932  | Intergenic      | 0.91 | $8.52 \times 10^{-9}$  |
| rs8180348   | 4 | 75,327,088  | Intergenic      | 0.85 | $2.48 \times 10^{-8}$  |
| rs78123185  | 4 | 91,654,081  | <i>CCSER1</i>   | 0.94 | $7.40 \times 10^{-9}$  |
| rs77704340  | 4 | 105,226,817 | Intergenic      | 0.88 | $1.47 \times 10^{-8}$  |
| rs2726175   | 4 | 108,632,261 | <i>PAPSS1</i>   | 0.77 | $4.29 \times 10^{-8}$  |
| rs17183807  | 4 | 182,234,918 | Intergenic      | 0.84 | $2.06 \times 10^{-8}$  |
| rs75281711  | 4 | 182,710,937 | Intergenic      | 0.84 | $4.20 \times 10^{-8}$  |
| rs7679898   | 4 | 190,355,762 | Intergenic      | 0.82 | $1.37 \times 10^{-8}$  |
| rs77561888  | 5 | 4,801,731   | Intergenic      | 0.95 | $2.13 \times 10^{-9}$  |
| rs79619750  | 5 | 17,821,874  | Intergenic      | 0.82 | $4.94 \times 10^{-8}$  |
| rs75226414  | 5 | 17,911,018  | Intergenic      | 0.83 | $3.49 \times 10^{-8}$  |
| rs10069923  | 5 | 18,034,385  | Intergenic      | 0.84 | $9.52 \times 10^{-9}$  |
| rs10066941  | 5 | 18,034,392  | Intergenic      | 0.77 | $4.44 \times 10^{-8}$  |
| rs10060996  | 5 | 18,034,395  | Intergenic      | 0.82 | $1.75 \times 10^{-8}$  |
| rs6889983   | 5 | 41,898,342  | Intergenic      | 0.83 | $1.11 \times 10^{-8}$  |
| rs78443884  | 5 | 55,221,681  | Intergenic      | 0.94 | $8.12 \times 10^{-9}$  |
| rs146746286 | 5 | 55,222,866  | Intergenic      | 0.92 | $1.13 \times 10^{-8}$  |
| rs78474013  | 5 | 55,226,602  | Intergenic      | 0.90 | $2.11 \times 10^{-8}$  |
| rs78973579  | 5 | 100,632,099 | Intergenic      | 0.86 | $4.96 \times 10^{-8}$  |
| rs145480261 | 5 | 100,632,978 | Intergenic      | 0.86 | $4.96 \times 10^{-8}$  |
| rs79583134  | 5 | 113,878,402 | Intergenic      | 0.89 | $1.91 \times 10^{-8}$  |
| rs142493716 | 5 | 114,161,962 | Intergenic      | 0.85 | $4.20 \times 10^{-8}$  |
| rs17465433  | 5 | 114,318,903 | Intergenic      | 0.87 | $4.39 \times 10^{-8}$  |
| rs67186626  | 5 | 118,616,559 | <i>TNFAIP8</i>  | 0.84 | $3.04 \times 10^{-8}$  |
| rs72786118  | 5 | 118,628,798 | <i>TNFAIP8</i>  | 0.83 | $4.68 \times 10^{-8}$  |
| rs6892980   | 5 | 118,635,662 | <i>TNFAIP8</i>  | 0.83 | $4.68 \times 10^{-8}$  |
| rs72786125  | 5 | 118,646,065 | <i>TNFAIP8</i>  | 0.83 | $4.68 \times 10^{-8}$  |
| rs260873    | 5 | 173,261,597 | Intergenic      | 0.85 | $1.79 \times 10^{-8}$  |
| rs260876    | 5 | 173,262,738 | Intergenic      | 0.85 | $1.79 \times 10^{-8}$  |
| rs2659190   | 5 | 173,264,384 | Intergenic      | 0.85 | $1.79 \times 10^{-8}$  |
| rs56022632  | 5 | 179,600,711 | <i>RASGEF1C</i> | 0.91 | $9.37 \times 10^{-9}$  |

|             |   |             |                  |      |                       |
|-------------|---|-------------|------------------|------|-----------------------|
| rs55754257  | 6 | 5,271,455   | <i>FARS2</i>     | 0.82 | $4.90 \times 10^{-8}$ |
| rs7753956   | 6 | 20,538,044  | <i>CDKALI</i>    | 0.81 | $4.87 \times 10^{-8}$ |
| rs7753670   | 6 | 20,538,045  | <i>CDKALI</i>    | 0.81 | $4.87 \times 10^{-8}$ |
| rs77880726  | 6 | 20,618,098  | <i>CDKALI</i>    | 0.81 | $3.72 \times 10^{-8}$ |
| rs115521560 | 6 | 32,019,382  | <i>TNXB</i>      | 0.97 | $2.57 \times 10^{-9}$ |
| rs190197731 | 6 | 33,009,588  | Intergenic       | 0.86 | $2.39 \times 10^{-8}$ |
| rs41273094  | 6 | 37,606,190  | <i>MDGA1</i>     | 0.86 | $2.34 \times 10^{-8}$ |
| rs11753500  | 6 | 37,606,827  | <i>MDGA1</i>     | 0.86 | $2.34 \times 10^{-8}$ |
| rs75714694  | 6 | 39,226,061  | Intergenic       | 0.90 | $9.24 \times 10^{-9}$ |
| rs1547079   | 6 | 135,749,202 | <i>AHII</i>      | 0.90 | $1.44 \times 10^{-8}$ |
| rs1547080   | 6 | 135,749,315 | <i>AHII</i>      | 0.90 | $1.44 \times 10^{-8}$ |
| rs2757640   | 6 | 135,752,813 | <i>AHII</i>      | 0.90 | $1.44 \times 10^{-8}$ |
| rs737561    | 6 | 135,754,471 | <i>AHII</i>      | 0.90 | $1.44 \times 10^{-8}$ |
| rs2614271   | 6 | 135,759,104 | <i>AHII</i>      | 0.90 | $1.44 \times 10^{-8}$ |
| rs2614272   | 6 | 135,761,086 | <i>AHII</i>      | 0.90 | $1.44 \times 10^{-8}$ |
| rs2757645   | 6 | 135,763,866 | <i>AHII</i>      | 0.90 | $1.44 \times 10^{-8}$ |
| rs4896148   | 6 | 135,798,221 | <i>AHII</i>      | 0.85 | $3.69 \times 10^{-8}$ |
| rs9385724   | 6 | 135,807,442 | <i>AHII</i>      | 0.90 | $1.44 \times 10^{-8}$ |
| rs7769298   | 6 | 135,809,811 | <i>AHII</i>      | 0.90 | $1.44 \times 10^{-8}$ |
| rs6928455   | 6 | 135,818,135 | <i>AHII</i>      | 0.90 | $1.44 \times 10^{-8}$ |
| rs7771001   | 6 | 135,827,751 | <i>LINC00271</i> | 0.90 | $1.44 \times 10^{-8}$ |
| rs4896151   | 6 | 135,829,796 | <i>LINC00271</i> | 0.90 | $1.44 \times 10^{-8}$ |
| rs7753598   | 6 | 135,837,192 | <i>LINC00271</i> | 0.90 | $1.44 \times 10^{-8}$ |
| rs73564174  | 6 | 135,844,235 | <i>LINC00271</i> | 0.88 | $1.60 \times 10^{-8}$ |
| rs6899366   | 6 | 135,845,145 | <i>LINC00271</i> | 0.94 | $6.16 \times 10^{-9}$ |
| rs9483847   | 6 | 135,872,148 | <i>LINC00271</i> | 0.90 | $1.44 \times 10^{-8}$ |
| rs9494273   | 6 | 135,876,343 | <i>LINC00271</i> | 0.90 | $1.44 \times 10^{-8}$ |
| rs79314354  | 6 | 135,876,368 | <i>LINC00271</i> | 0.90 | $1.44 \times 10^{-8}$ |
| rs73548042  | 6 | 135,877,051 | <i>LINC00271</i> | 0.90 | $1.44 \times 10^{-8}$ |
| rs9494274   | 6 | 135,880,480 | <i>LINC00271</i> | 0.90 | $1.44 \times 10^{-8}$ |
| rs9483849   | 6 | 135,883,459 | <i>LINC00271</i> | 0.90 | $1.44 \times 10^{-8}$ |
| rs9494278   | 6 | 135,885,150 | <i>LINC00271</i> | 0.90 | $1.44 \times 10^{-8}$ |
| rs2327644   | 6 | 135,887,986 | <i>LINC00271</i> | 0.89 | $1.49 \times 10^{-8}$ |
| rs9402720   | 6 | 135,893,950 | <i>LINC00271</i> | 0.90 | $1.44 \times 10^{-8}$ |
| rs761358    | 6 | 135,895,908 | <i>LINC00271</i> | 0.90 | $1.44 \times 10^{-8}$ |
| rs2092556   | 6 | 135,899,344 | <i>LINC00271</i> | 0.90 | $1.44 \times 10^{-8}$ |
| rs2092557   | 6 | 135,899,406 | <i>LINC00271</i> | 0.85 | $3.57 \times 10^{-8}$ |
| rs9385727   | 6 | 135,900,517 | <i>LINC00271</i> | 0.90 | $1.44 \times 10^{-8}$ |
| rs4895453   | 6 | 135,903,717 | <i>LINC00271</i> | 0.90 | $1.44 \times 10^{-8}$ |
| rs9376109   | 6 | 135,904,201 | <i>LINC00271</i> | 0.90 | $1.44 \times 10^{-8}$ |
| rs9321510   | 6 | 135,904,344 | <i>LINC00271</i> | 0.90 | $1.44 \times 10^{-8}$ |
| rs7738149   | 6 | 135,905,911 | <i>LINC00271</i> | 0.90 | $1.44 \times 10^{-8}$ |
| rs10457011  | 6 | 135,907,028 | <i>LINC00271</i> | 0.90 | $1.44 \times 10^{-8}$ |
| rs6939015   | 6 | 135,909,369 | <i>LINC00271</i> | 0.90 | $1.44 \times 10^{-8}$ |
| rs6901371   | 6 | 135,910,246 | <i>LINC00271</i> | 0.90 | $1.44 \times 10^{-8}$ |
| rs6570017   | 6 | 135,911,312 | <i>LINC00271</i> | 0.90 | $1.44 \times 10^{-8}$ |
| rs7750367   | 6 | 135,911,705 | <i>LINC00271</i> | 0.90 | $1.44 \times 10^{-8}$ |
| rs7750001   | 6 | 135,911,726 | <i>LINC00271</i> | 0.90 | $1.44 \times 10^{-8}$ |
| rs7750455   | 6 | 135,912,007 | <i>LINC00271</i> | 0.90 | $1.44 \times 10^{-8}$ |

|             |   |             |                     |      |                       |
|-------------|---|-------------|---------------------|------|-----------------------|
| rs12199810  | 6 | 135,912,356 | <i>LINC00271</i>    | 0.90 | $1.44 \times 10^{-8}$ |
| rs73005187  | 6 | 148,213,847 | Intergenic          | 0.96 | $1.41 \times 10^{-9}$ |
| rs73009227  | 6 | 148,266,265 | Intergenic          | 0.93 | $2.03 \times 10^{-9}$ |
| rs7755568   | 6 | 153,076,955 | <i>VIP</i>          | 0.85 | $4.76 \times 10^{-8}$ |
| rs76286622  | 6 | 156,278,679 | Intergenic          | 0.81 | $1.73 \times 10^{-8}$ |
| rs183784545 | 6 | 170,728,095 | Intergenic          | 0.92 | $1.00 \times 10^{-8}$ |
| rs113342503 | 7 | 543,455     | <i>PDGFA</i>        | 0.88 | $5.04 \times 10^{-9}$ |
| rs3807507   | 7 | 16,791,813  | Intergenic          | 0.92 | $1.01 \times 10^{-8}$ |
| rs10227609  | 7 | 27,547,752  | Intergenic          | 0.93 | $6.38 \times 10^{-9}$ |
| rs10231814  | 7 | 27,548,852  | Intergenic          | 0.92 | $6.69 \times 10^{-9}$ |
| rs192570103 | 7 | 45,420,818  | Intergenic          | 0.86 | $2.24 \times 10^{-8}$ |
| rs73120083  | 7 | 51,406,354  | Intergenic          | 0.90 | $1.98 \times 10^{-9}$ |
| rs60180169  | 7 | 86,500,761  | Intergenic          | 0.84 | $1.69 \times 10^{-8}$ |
| rs74498030  | 7 | 92,056,778  | Intergenic          | 0.93 | $9.99 \times 10^{-9}$ |
| rs146492539 | 7 | 102,397,984 | <i>FAM185A</i>      | 0.83 | $1.29 \times 10^{-8}$ |
| rs111878132 | 7 | 129,412,870 | Intergenic          | 0.91 | $2.25 \times 10^{-8}$ |
| rs11509175  | 7 | 148,698,494 | Intergenic          | 0.91 | $7.31 \times 10^{-9}$ |
| rs142632040 | 7 | 151,230,546 | Intergenic          | 0.83 | $2.29 \times 10^{-8}$ |
| rs17501986  | 8 | 16,979,116  | <i>MICU3</i>        | 0.82 | $2.72 \times 10^{-8}$ |
| rs10088713  | 8 | 52,923,780  | Intergenic          | 0.95 | $3.12 \times 10^{-9}$ |
| rs148835832 | 8 | 69,626,660  | <i>C8orf34</i>      | 0.96 | $1.62 \times 10^{-9}$ |
| rs77747156  | 8 | 72,823,774  | <i>LOC100132891</i> | 0.86 | $2.84 \times 10^{-8}$ |
| rs117318601 | 8 | 74,285,456  | Intergenic          | 1.00 | $1.25 \times 10^{-9}$ |
| rs35693157  | 8 | 103,207,648 | Intergenic          | 0.81 | $3.29 \times 10^{-8}$ |
| rs748020    | 8 | 125,615,666 | <i>MTSSI</i>        | 0.90 | $4.92 \times 10^{-9}$ |
| rs75912457  | 9 | 13,806,413  | Intergenic          | 0.81 | $4.87 \times 10^{-8}$ |
| rs76625048  | 9 | 111,187,033 | Intergenic          | 0.80 | $3.48 \times 10^{-8}$ |
| rs11789283  | 9 | 111,189,685 | Intergenic          | 0.80 | $3.48 \times 10^{-8}$ |
| rs75622013  | 9 | 111,191,289 | Intergenic          | 0.80 | $3.48 \times 10^{-8}$ |
| rs78988889  | 9 | 111,192,836 | Intergenic          | 0.80 | $3.48 \times 10^{-8}$ |
| rs116942211 | 9 | 111,196,400 | Intergenic          | 0.80 | $3.48 \times 10^{-8}$ |
| rs34455546  | 9 | 111,197,580 | Intergenic          | 0.80 | $3.48 \times 10^{-8}$ |
| rs78708592  | 9 | 111,198,211 | Intergenic          | 0.80 | $3.48 \times 10^{-8}$ |
| rs75369110  | 9 | 111,198,395 | Intergenic          | 0.80 | $3.48 \times 10^{-8}$ |
| rs11791386  | 9 | 111,199,204 | Intergenic          | 0.80 | $3.48 \times 10^{-8}$ |
| rs79289833  | 9 | 111,205,524 | Intergenic          | 0.80 | $3.48 \times 10^{-8}$ |
| rs117931220 | 9 | 111,208,303 | Intergenic          | 0.82 | $2.77 \times 10^{-8}$ |
| rs76437301  | 9 | 111,210,693 | Intergenic          | 0.82 | $2.77 \times 10^{-8}$ |
| rs75847842  | 9 | 111,211,027 | Intergenic          | 0.82 | $2.77 \times 10^{-8}$ |
| rs78059003  | 9 | 111,211,202 | Intergenic          | 0.82 | $2.77 \times 10^{-8}$ |
| rs11791681  | 9 | 111,211,790 | Intergenic          | 0.82 | $2.77 \times 10^{-8}$ |
| rs117228370 | 9 | 111,212,116 | Intergenic          | 0.82 | $2.77 \times 10^{-8}$ |
| rs11792813  | 9 | 111,213,713 | Intergenic          | 0.82 | $2.77 \times 10^{-8}$ |
| rs117001923 | 9 | 111,215,031 | Intergenic          | 0.82 | $2.77 \times 10^{-8}$ |
| rs117422220 | 9 | 111,215,240 | Intergenic          | 0.82 | $2.77 \times 10^{-8}$ |
| rs148524963 | 9 | 111,215,546 | Intergenic          | 0.82 | $2.77 \times 10^{-8}$ |
| rs75863099  | 9 | 111,216,637 | Intergenic          | 0.82 | $2.77 \times 10^{-8}$ |
| rs79150470  | 9 | 111,216,712 | Intergenic          | 0.82 | $2.77 \times 10^{-8}$ |
| rs76169971  | 9 | 111,216,881 | Intergenic          | 0.82 | $2.77 \times 10^{-8}$ |

|             |    |             |                     |      |                       |
|-------------|----|-------------|---------------------|------|-----------------------|
| rs79953945  | 9  | 111,216,951 | Intergenic          | 0.82 | $2.77 \times 10^{-8}$ |
| rs77160051  | 9  | 111,217,312 | Intergenic          | 0.82 | $2.77 \times 10^{-8}$ |
| rs76011702  | 9  | 111,218,554 | Intergenic          | 0.82 | $2.77 \times 10^{-8}$ |
| rs11790776  | 9  | 111,218,815 | Intergenic          | 0.82 | $2.77 \times 10^{-8}$ |
| rs79702132  | 9  | 111,221,084 | Intergenic          | 0.82 | $2.77 \times 10^{-8}$ |
| rs79149655  | 9  | 111,221,452 | Intergenic          | 0.82 | $2.77 \times 10^{-8}$ |
| rs118050757 | 9  | 111,221,509 | Intergenic          | 0.82 | $2.77 \times 10^{-8}$ |
| rs11792603  | 9  | 111,231,437 | Intergenic          | 0.82 | $2.77 \times 10^{-8}$ |
| rs11795088  | 9  | 111,231,609 | Intergenic          | 0.82 | $2.77 \times 10^{-8}$ |
| rs11795100  | 9  | 111,231,677 | Intergenic          | 0.82 | $2.77 \times 10^{-8}$ |
| rs11795107  | 9  | 111,231,747 | Intergenic          | 0.82 | $2.77 \times 10^{-8}$ |
| rs75134352  | 9  | 111,232,022 | Intergenic          | 0.82 | $2.77 \times 10^{-8}$ |
| rs75824730  | 9  | 111,232,356 | Intergenic          | 0.82 | $2.77 \times 10^{-8}$ |
| rs79924554  | 9  | 111,232,431 | Intergenic          | 0.82 | $2.77 \times 10^{-8}$ |
| rs76572758  | 9  | 111,232,525 | Intergenic          | 0.82 | $2.77 \times 10^{-8}$ |
| rs76568758  | 9  | 111,232,587 | Intergenic          | 0.82 | $2.77 \times 10^{-8}$ |
| rs11793635  | 9  | 111,232,786 | Intergenic          | 0.82 | $2.77 \times 10^{-8}$ |
| rs11793660  | 9  | 111,232,885 | Intergenic          | 0.82 | $2.77 \times 10^{-8}$ |
| rs11793670  | 9  | 111,233,122 | Intergenic          | 0.80 | $3.48 \times 10^{-8}$ |
| rs76695330  | 9  | 111,234,152 | Intergenic          | 0.82 | $2.77 \times 10^{-8}$ |
| rs80285538  | 9  | 111,234,296 | Intergenic          | 0.82 | $2.77 \times 10^{-8}$ |
| rs76586402  | 9  | 111,234,988 | Intergenic          | 0.82 | $2.77 \times 10^{-8}$ |
| rs78099991  | 9  | 111,235,072 | Intergenic          | 0.82 | $2.77 \times 10^{-8}$ |
| rs75964459  | 9  | 111,235,327 | Intergenic          | 0.82 | $2.77 \times 10^{-8}$ |
| rs79399238  | 9  | 111,235,347 | Intergenic          | 0.82 | $2.77 \times 10^{-8}$ |
| rs78706615  | 9  | 111,235,494 | Intergenic          | 0.82 | $2.77 \times 10^{-8}$ |
| rs28472497  | 9  | 111,236,232 | Intergenic          | 0.82 | $2.77 \times 10^{-8}$ |
| rs79206216  | 9  | 111,236,663 | Intergenic          | 0.82 | $2.77 \times 10^{-8}$ |
| rs78100318  | 9  | 111,237,144 | Intergenic          | 0.82 | $2.77 \times 10^{-8}$ |
| rs78409632  | 9  | 111,237,210 | Intergenic          | 0.82 | $2.77 \times 10^{-8}$ |
| rs76463536  | 9  | 111,237,360 | Intergenic          | 0.82 | $2.77 \times 10^{-8}$ |
| rs78603953  | 9  | 111,238,375 | Intergenic          | 0.82 | $2.77 \times 10^{-8}$ |
| rs117548041 | 9  | 111,239,197 | Intergenic          | 0.82 | $2.77 \times 10^{-8}$ |
| rs80087940  | 9  | 111,239,406 | Intergenic          | 0.82 | $2.77 \times 10^{-8}$ |
| rs4842003   | 9  | 138,469,962 | <i>LOC100130954</i> | 0.85 | $1.45 \times 10^{-8}$ |
| rs149710354 | 10 | 32,163,825  | <i>ARHGAP12</i>     | 0.88 | $7.89 \times 10^{-9}$ |
| rs138842148 | 10 | 44,635,901  | Intergenic          | 0.86 | $2.48 \times 10^{-8}$ |
| rs80229115  | 10 | 67,160,808  | Intergenic          | 0.85 | $1.56 \times 10^{-8}$ |
| rs148962069 | 10 | 67,943,910  | <i>CTNNA3</i>       | 0.89 | $1.70 \times 10^{-8}$ |
| rs118029533 | 10 | 67,953,378  | <i>CTNNA3</i>       | 0.89 | $1.70 \times 10^{-8}$ |
| rs75064987  | 10 | 67,963,587  | <i>CTNNA3</i>       | 0.95 | $4.46 \times 10^{-9}$ |
| rs116861785 | 10 | 68,000,935  | <i>CTNNA3</i>       | 0.88 | $1.72 \times 10^{-8}$ |
| rs78881304  | 10 | 68,012,194  | <i>CTNNA3</i>       | 0.88 | $1.72 \times 10^{-8}$ |
| rs117911839 | 10 | 68,051,162  | <i>CTNNA3</i>       | 0.90 | $1.02 \times 10^{-8}$ |
| rs72804042  | 10 | 73,660,795  | Intergenic          | 0.88 | $1.44 \times 10^{-8}$ |
| rs11814711  | 10 | 73,674,311  | Intergenic          | 0.81 | $4.91 \times 10^{-8}$ |
| rs61851387  | 10 | 80,971,456  | <i>ZMIZ1</i>        | 0.83 | $3.24 \times 10^{-8}$ |
| rs61851432  | 10 | 81,068,503  | <i>ZMIZ1</i>        | 0.87 | $2.57 \times 10^{-8}$ |
| rs34755137  | 10 | 104,326,807 | <i>SUFU</i>         | 0.90 | $1.64 \times 10^{-8}$ |

|             |    |             |                 |      |                       |
|-------------|----|-------------|-----------------|------|-----------------------|
| rs11198464  | 10 | 120,269,140 | Intergenic      | 0.82 | $3.71 \times 10^{-8}$ |
| rs75622275  | 10 | 120,274,981 | Intergenic      | 0.82 | $3.71 \times 10^{-8}$ |
| rs1878427   | 10 | 120,278,805 | Intergenic      | 0.82 | $3.71 \times 10^{-8}$ |
| rs78191986  | 10 | 120,288,127 | Intergenic      | 0.82 | $3.71 \times 10^{-8}$ |
| rs76527683  | 10 | 120,288,291 | Intergenic      | 0.82 | $3.71 \times 10^{-8}$ |
| rs12255218  | 10 | 120,289,112 | Intergenic      | 0.82 | $3.71 \times 10^{-8}$ |
| rs55861953  | 10 | 120,334,998 | Intergenic      | 0.82 | $3.71 \times 10^{-8}$ |
| rs55742702  | 10 | 120,337,467 | Intergenic      | 0.82 | $3.71 \times 10^{-8}$ |
| rs2478396   | 10 | 122,223,465 | <i>PPAPDC1A</i> | 0.89 | $3.43 \times 10^{-8}$ |
| rs2463157   | 10 | 122,230,436 | <i>PPAPDC1A</i> | 0.94 | $1.05 \times 10^{-8}$ |
| rs12225521  | 11 | 398,487     | <i>PKP3</i>     | 0.88 | $1.90 \times 10^{-8}$ |
| rs112079256 | 11 | 18,163,766  | Intergenic      | 0.81 | $3.11 \times 10^{-8}$ |
| rs4328214   | 11 | 23,974,293  | Intergenic      | 0.81 | $3.99 \times 10^{-8}$ |
| rs71539700  | 11 | 64,614,053  | Intergenic      | 0.87 | $1.18 \times 10^{-8}$ |
| rs117156612 | 11 | 79,946,365  | Intergenic      | 0.90 | $2.25 \times 10^{-8}$ |
| rs77675320  | 11 | 79,965,253  | Intergenic      | 0.90 | $1.90 \times 10^{-8}$ |
| rs10458956  | 11 | 110,249,521 | Intergenic      | 0.92 | $6.08 \times 10^{-9}$ |
| rs12225141  | 11 | 110,250,955 | Intergenic      | 0.87 | $2.18 \times 10^{-8}$ |
| rs11213379  | 11 | 110,258,399 | Intergenic      | 0.87 | $3.17 \times 10^{-8}$ |
| rs4754442   | 11 | 110,258,883 | Intergenic      | 0.88 | $1.94 \times 10^{-8}$ |
| rs11213383  | 11 | 110,259,766 | Intergenic      | 0.88 | $1.94 \times 10^{-8}$ |
| rs10466564  | 11 | 110,260,925 | Intergenic      | 0.88 | $1.94 \times 10^{-8}$ |
| rs10466565  | 11 | 110,260,968 | Intergenic      | 0.88 | $1.94 \times 10^{-8}$ |
| rs10466566  | 11 | 110,261,035 | Intergenic      | 0.88 | $1.94 \times 10^{-8}$ |
| rs10128698  | 11 | 110,261,921 | Intergenic      | 0.85 | $3.52 \times 10^{-8}$ |
| rs10891096  | 11 | 110,262,743 | Intergenic      | 0.88 | $1.94 \times 10^{-8}$ |
| rs12295722  | 11 | 110,266,637 | Intergenic      | 0.88 | $1.94 \times 10^{-8}$ |
| rs12288784  | 11 | 110,266,787 | Intergenic      | 0.85 | $3.52 \times 10^{-8}$ |
| rs4753890   | 11 | 110,271,912 | Intergenic      | 0.88 | $1.94 \times 10^{-8}$ |
| rs111890121 | 11 | 110,276,553 | Intergenic      | 0.88 | $1.94 \times 10^{-8}$ |
| rs11600412  | 11 | 110,277,028 | Intergenic      | 0.85 | $3.52 \times 10^{-8}$ |
| rs12286289  | 11 | 110,284,974 | Intergenic      | 0.88 | $1.94 \times 10^{-8}$ |
| rs12279767  | 11 | 110,286,345 | Intergenic      | 0.85 | $3.52 \times 10^{-8}$ |
| rs11537140  | 11 | 110,290,587 | Intergenic      | 0.85 | $2.97 \times 10^{-8}$ |
| rs4612769   | 11 | 110,292,442 | Intergenic      | 0.83 | $4.94 \times 10^{-8}$ |
| rs4309126   | 11 | 110,292,583 | Intergenic      | 0.88 | $1.94 \times 10^{-8}$ |
| rs11213393  | 11 | 110,293,177 | Intergenic      | 0.85 | $3.52 \times 10^{-8}$ |
| rs11213396  | 11 | 110,296,603 | Intergenic      | 0.88 | $1.94 \times 10^{-8}$ |
| rs12271353  | 11 | 110,298,026 | Intergenic      | 0.88 | $1.94 \times 10^{-8}$ |
| rs3759018   | 11 | 110,299,437 | Intergenic      | 0.90 | $1.70 \times 10^{-8}$ |
| rs12294963  | 11 | 110,324,894 | <i>FDXI</i>     | 0.88 | $1.94 \times 10^{-8}$ |
| rs10891117  | 11 | 110,326,306 | <i>FDXI</i>     | 0.88 | $1.94 \times 10^{-8}$ |
| rs112562144 | 11 | 110,327,380 | <i>FDXI</i>     | 0.88 | $1.94 \times 10^{-8}$ |
| rs11213416  | 11 | 110,335,761 | Intergenic      | 0.89 | $1.42 \times 10^{-8}$ |
| rs11213417  | 11 | 110,335,791 | Intergenic      | 0.88 | $1.94 \times 10^{-8}$ |
| rs7930277   | 11 | 110,336,589 | Intergenic      | 0.83 | $4.94 \times 10^{-8}$ |
| rs12273095  | 11 | 110,337,897 | Intergenic      | 0.88 | $1.94 \times 10^{-8}$ |
| rs12280232  | 11 | 110,341,416 | Intergenic      | 0.88 | $1.94 \times 10^{-8}$ |
| rs11604389  | 11 | 110,343,502 | Intergenic      | 0.98 | $1.51 \times 10^{-9}$ |

|             |    |             |            |      |                       |
|-------------|----|-------------|------------|------|-----------------------|
| rs10789774  | 11 | 110,345,609 | Intergenic | 0.85 | $3.52 \times 10^{-8}$ |
| rs11213426  | 11 | 110,349,093 | Intergenic | 0.88 | $1.94 \times 10^{-8}$ |
| rs12279406  | 11 | 110,353,314 | Intergenic | 0.86 | $2.77 \times 10^{-8}$ |
| rs10891123  | 11 | 110,354,193 | Intergenic | 0.88 | $1.94 \times 10^{-8}$ |
| rs10891124  | 11 | 110,357,002 | Intergenic | 0.86 | $2.77 \times 10^{-8}$ |
| rs11213434  | 11 | 110,357,423 | Intergenic | 0.88 | $1.94 \times 10^{-8}$ |
| rs12416743  | 11 | 110,358,849 | Intergenic | 0.89 | $1.38 \times 10^{-8}$ |
| rs73018155  | 11 | 110,359,517 | Intergenic | 0.88 | $1.94 \times 10^{-8}$ |
| rs56261230  | 11 | 110,361,952 | Intergenic | 0.94 | $3.86 \times 10^{-9}$ |
| rs894560    | 11 | 110,362,655 | Intergenic | 0.84 | $4.63 \times 10^{-8}$ |
| rs79860085  | 11 | 123,577,937 | Intergenic | 0.88 | $1.27 \times 10^{-8}$ |
| rs75522719  | 11 | 123,586,519 | Intergenic | 0.86 | $1.97 \times 10^{-8}$ |
| rs77286281  | 11 | 123,616,807 | Intergenic | 0.84 | $3.07 \times 10^{-8}$ |
| rs11605363  | 11 | 123,670,457 | Intergenic | 0.83 | $2.89 \times 10^{-8}$ |
| rs11219462  | 11 | 123,990,245 | VWA5A      | 0.93 | $1.55 \times 10^{-9}$ |
| rs76833948  | 11 | 128,596,369 | FLII       | 0.88 | $2.26 \times 10^{-8}$ |
| rs61909570  | 11 | 131,012,797 | Intergenic | 0.89 | $2.03 \times 10^{-8}$ |
| rs79273268  | 11 | 134,223,355 | GLB1L2     | 0.97 | $2.42 \times 10^{-9}$ |
| rs72647360  | 12 | 861,105     | Intergenic | 0.83 | $2.85 \times 10^{-8}$ |
| rs113260958 | 12 | 880,820     | WNK1       | 0.83 | $3.80 \times 10^{-8}$ |
| rs77936233  | 12 | 888,504     | WNK1       | 1.00 | $1.12 \times 10^{-9}$ |
| rs12314329  | 12 | 909,731     | WNK1       | 0.87 | $1.18 \times 10^{-8}$ |
| rs11064544  | 12 | 921,471     | WNK1       | 0.87 | $1.18 \times 10^{-8}$ |
| rs72648617  | 12 | 924,905     | WNK1       | 0.87 | $1.18 \times 10^{-8}$ |
| rs78772771  | 12 | 982,088     | WNK1       | 0.94 | $3.42 \times 10^{-9}$ |
| rs72650711  | 12 | 990,401     | WNK1       | 0.94 | $3.42 \times 10^{-9}$ |
| rs113230037 | 12 | 991,512     | WNK1       | 0.94 | $3.42 \times 10^{-9}$ |
| rs72650739  | 12 | 996,060     | WNK1       | 0.94 | $3.42 \times 10^{-9}$ |
| rs72650748  | 12 | 997,504     | WNK1       | 0.94 | $3.42 \times 10^{-9}$ |
| rs111850351 | 12 | 1,000,565   | WNK1       | 0.91 | $5.94 \times 10^{-9}$ |
| rs56291311  | 12 | 1,003,988   | WNK1       | 0.91 | $5.94 \times 10^{-9}$ |
| rs11571468  | 12 | 1,024,688   | RAD52      | 0.91 | $5.94 \times 10^{-9}$ |
| rs11571461  | 12 | 1,026,319   | RAD52      | 0.91 | $5.94 \times 10^{-9}$ |
| rs111359153 | 12 | 1,028,796   | RAD52      | 0.91 | $5.94 \times 10^{-9}$ |
| rs74809499  | 12 | 1,029,865   | RAD52      | 0.91 | $5.94 \times 10^{-9}$ |
| rs11571453  | 12 | 1,034,278   | RAD52      | 0.91 | $5.94 \times 10^{-9}$ |
| rs11571446  | 12 | 1,035,817   | RAD52      | 0.91 | $5.94 \times 10^{-9}$ |
| rs11571439  | 12 | 1,036,754   | RAD52      | 0.91 | $5.94 \times 10^{-9}$ |
| rs11571435  | 12 | 1,037,288   | RAD52      | 0.91 | $5.94 \times 10^{-9}$ |
| rs79707121  | 12 | 1,044,493   | RAD52      | 0.91 | $5.94 \times 10^{-9}$ |
| rs11571370  | 12 | 1,060,077   | Intergenic | 0.89 | $9.59 \times 10^{-9}$ |
| rs111428366 | 12 | 1,064,889   | Intergenic | 0.95 | $2.03 \times 10^{-9}$ |
| rs76202538  | 12 | 1,068,333   | Intergenic | 0.95 | $2.03 \times 10^{-9}$ |
| rs77148121  | 12 | 1,078,064   | Intergenic | 0.84 | $2.33 \times 10^{-8}$ |
| rs60762427  | 12 | 1,078,225   | Intergenic | 0.82 | $3.44 \times 10^{-8}$ |
| rs76902794  | 12 | 21,885,429  | Intergenic | 0.84 | $2.64 \times 10^{-8}$ |
| rs117373058 | 12 | 27,277,185  | Intergenic | 0.83 | $4.45 \times 10^{-8}$ |
| rs56944757  | 12 | 27,757,515  | PPFIBP1    | 0.85 | $1.71 \times 10^{-8}$ |
| rs6487619   | 12 | 27,769,030  | PPFIBP1    | 0.82 | $3.11 \times 10^{-8}$ |

|             |    |            |                |      |                        |
|-------------|----|------------|----------------|------|------------------------|
| rs10842953  | 12 | 27,771,749 | <i>PPFIBP1</i> | 0.82 | $3.11 \times 10^{-8}$  |
| rs147524932 | 12 | 28,098,494 | Intergenic     | 0.86 | $1.82 \times 10^{-8}$  |
| rs16919514  | 12 | 32,386,414 | <i>BICD1</i>   | 0.94 | $7.33 \times 10^{-9}$  |
| rs7969641   | 12 | 44,310,268 | <i>TMEM117</i> | 0.87 | $4.22 \times 10^{-9}$  |
| rs11182326  | 12 | 44,310,333 | <i>TMEM117</i> | 0.87 | $4.22 \times 10^{-9}$  |
| rs11182327  | 12 | 44,310,418 | <i>TMEM117</i> | 0.79 | $1.42 \times 10^{-8}$  |
| rs10880586  | 12 | 44,310,604 | <i>TMEM117</i> | 0.79 | $1.42 \times 10^{-8}$  |
| rs11182328  | 12 | 44,311,277 | <i>TMEM117</i> | 0.87 | $4.22 \times 10^{-9}$  |
| rs10880588  | 12 | 44,311,787 | <i>TMEM117</i> | 0.79 | $1.42 \times 10^{-8}$  |
| rs10785470  | 12 | 44,311,983 | <i>TMEM117</i> | 0.79 | $1.42 \times 10^{-8}$  |
| rs10785471  | 12 | 44,311,998 | <i>TMEM117</i> | 0.79 | $1.42 \times 10^{-8}$  |
| rs7964465   | 12 | 44,312,649 | <i>TMEM117</i> | 0.79 | $1.42 \times 10^{-8}$  |
| rs10785472  | 12 | 44,312,774 | <i>TMEM117</i> | 0.79 | $1.42 \times 10^{-8}$  |
| rs12369569  | 12 | 44,313,000 | <i>TMEM117</i> | 0.79 | $1.42 \times 10^{-8}$  |
| rs10880589  | 12 | 44,313,193 | <i>TMEM117</i> | 0.79 | $1.42 \times 10^{-8}$  |
| rs7956825   | 12 | 44,313,718 | <i>TMEM117</i> | 0.79 | $1.42 \times 10^{-8}$  |
| rs7974501   | 12 | 44,313,794 | <i>TMEM117</i> | 0.79 | $1.42 \times 10^{-8}$  |
| rs7971487   | 12 | 44,313,830 | <i>TMEM117</i> | 0.79 | $1.42 \times 10^{-8}$  |
| rs7957074   | 12 | 44,313,906 | <i>TMEM117</i> | 0.79 | $1.42 \times 10^{-8}$  |
| rs73100931  | 12 | 44,314,388 | <i>TMEM117</i> | 0.79 | $1.42 \times 10^{-8}$  |
| rs11182329  | 12 | 44,314,564 | <i>TMEM117</i> | 0.79 | $1.42 \times 10^{-8}$  |
| rs10880591  | 12 | 44,314,630 | <i>TMEM117</i> | 0.79 | $1.42 \times 10^{-8}$  |
| rs2031056   | 12 | 44,315,008 | <i>TMEM117</i> | 0.79 | $1.42 \times 10^{-8}$  |
| rs10748379  | 12 | 44,315,397 | <i>TMEM117</i> | 0.79 | $1.42 \times 10^{-8}$  |
| rs10748380  | 12 | 44,315,492 | <i>TMEM117</i> | 0.79 | $1.42 \times 10^{-8}$  |
| rs4238092   | 12 | 44,315,762 | <i>TMEM117</i> | 0.87 | $4.22 \times 10^{-9}$  |
| rs4238093   | 12 | 44,315,925 | <i>TMEM117</i> | 0.79 | $1.42 \times 10^{-8}$  |
| rs10506232  | 12 | 44,316,485 | <i>TMEM117</i> | 0.79 | $1.42 \times 10^{-8}$  |
| rs10785473  | 12 | 44,316,584 | <i>TMEM117</i> | 0.79 | $1.42 \times 10^{-8}$  |
| rs11182332  | 12 | 44,317,599 | <i>TMEM117</i> | 1.01 | $1.83 \times 10^{-10}$ |
| rs10785474  | 12 | 44,318,428 | <i>TMEM117</i> | 0.79 | $1.42 \times 10^{-8}$  |
| rs10785477  | 12 | 44,318,723 | <i>TMEM117</i> | 0.79 | $1.42 \times 10^{-8}$  |
| rs10785478  | 12 | 44,320,156 | <i>TMEM117</i> | 0.79 | $1.42 \times 10^{-8}$  |
| rs10785479  | 12 | 44,320,184 | <i>TMEM117</i> | 0.79 | $1.42 \times 10^{-8}$  |
| rs11182337  | 12 | 44,320,875 | <i>TMEM117</i> | 0.79 | $1.42 \times 10^{-8}$  |
| rs12301015  | 12 | 44,321,160 | <i>TMEM117</i> | 0.87 | $4.22 \times 10^{-9}$  |
| rs11829881  | 12 | 44,322,395 | <i>TMEM117</i> | 0.87 | $4.22 \times 10^{-9}$  |
| rs11830410  | 12 | 44,322,978 | <i>TMEM117</i> | 0.97 | $8.34 \times 10^{-10}$ |
| rs4417371   | 12 | 44,327,407 | <i>TMEM117</i> | 0.79 | $1.42 \times 10^{-8}$  |
| rs3925072   | 12 | 44,327,565 | <i>TMEM117</i> | 0.79 | $1.42 \times 10^{-8}$  |
| rs3925073   | 12 | 44,327,736 | <i>TMEM117</i> | 0.79 | $1.42 \times 10^{-8}$  |
| rs11182339  | 12 | 44,331,841 | <i>TMEM117</i> | 0.77 | $2.16 \times 10^{-8}$  |
| rs12305959  | 12 | 44,332,618 | <i>TMEM117</i> | 0.79 | $1.42 \times 10^{-8}$  |
| rs7312373   | 12 | 44,332,843 | <i>TMEM117</i> | 0.79 | $1.42 \times 10^{-8}$  |
| rs10880597  | 12 | 44,336,172 | <i>TMEM117</i> | 0.79 | $1.42 \times 10^{-8}$  |
| rs10880598  | 12 | 44,336,375 | <i>TMEM117</i> | 0.79 | $1.42 \times 10^{-8}$  |
| rs10880599  | 12 | 44,337,662 | <i>TMEM117</i> | 0.77 | $1.97 \times 10^{-8}$  |
| rs73100975  | 12 | 44,339,016 | <i>TMEM117</i> | 0.79 | $1.42 \times 10^{-8}$  |
| rs11182341  | 12 | 44,339,216 | <i>TMEM117</i> | 0.79 | $1.42 \times 10^{-8}$  |

|             |    |             |                           |                             |
|-------------|----|-------------|---------------------------|-----------------------------|
| rs12303804  | 12 | 44,340,018  | <i>TMEM117</i>            | 0.87 4.22×10 <sup>-9</sup>  |
| rs10785482  | 12 | 44,342,910  | <i>TMEM117</i>            | 0.79 1.42×10 <sup>-8</sup>  |
| rs12309681  | 12 | 44,343,202  | <i>TMEM117</i>            | 0.87 4.22×10 <sup>-9</sup>  |
| rs10880600  | 12 | 44,343,641  | <i>TMEM117</i>            | 0.80 9.50×10 <sup>-9</sup>  |
| rs10880601  | 12 | 44,343,768  | <i>TMEM117</i>            | 0.79 1.42×10 <sup>-8</sup>  |
| rs73085705  | 12 | 44,345,490  | <i>TMEM117</i>            | 1.01 1.83×10 <sup>-10</sup> |
| rs12315094  | 12 | 44,345,773  | <i>TMEM117</i>            | 0.87 4.22×10 <sup>-9</sup>  |
| rs11182345  | 12 | 44,347,202  | <i>TMEM117</i>            | 0.87 4.22×10 <sup>-9</sup>  |
| rs10880604  | 12 | 44,349,398  | <i>TMEM117</i>            | 0.79 1.42×10 <sup>-8</sup>  |
| rs10880605  | 12 | 44,349,669  | <i>TMEM117</i>            | 0.79 1.42×10 <sup>-8</sup>  |
| rs11182346  | 12 | 44,350,097  | <i>TMEM117</i>            | 0.79 1.42×10 <sup>-8</sup>  |
| rs141826304 | 12 | 49,711,077  | <i>LOC101927267</i>       | 0.85 2.17×10 <sup>-8</sup>  |
| rs1270901   | 12 | 49,835,245  | <i>SPATS2</i>             | 0.83 3.51×10 <sup>-8</sup>  |
| rs73112192  | 12 | 50,043,760  | <i>FMNL3</i>              | 0.85 2.70×10 <sup>-8</sup>  |
| rs6581474   | 12 | 63,607,898  | Intergenic                | 0.87 1.17×10 <sup>-8</sup>  |
| rs116945474 | 12 | 100,161,401 | <i>ANKS1B</i>             | 0.85 1.82×10 <sup>-8</sup>  |
| rs117095921 | 12 | 100,161,834 | <i>ANKS1B</i>             | 0.85 1.82×10 <sup>-8</sup>  |
| rs34998821  | 12 | 107,010,970 | <i>LOC100287944; RFX4</i> | 0.91 1.15×10 <sup>-8</sup>  |
| rs71452919  | 12 | 107,021,528 | <i>LOC100287944; RFX4</i> | 0.91 1.15×10 <sup>-8</sup>  |
| rs34956441  | 12 | 107,034,597 | <i>LOC100287944; RFX4</i> | 0.91 1.15×10 <sup>-8</sup>  |
| rs71452921  | 12 | 107,053,762 | <i>LOC100287944; RFX4</i> | 0.91 1.15×10 <sup>-8</sup>  |
| rs12827304  | 12 | 107,101,769 | <i>LOC100287944; RFX4</i> | 0.91 1.15×10 <sup>-8</sup>  |
| rs12833344  | 12 | 107,142,307 | <i>LOC100287944; RFX4</i> | 0.92 9.08×10 <sup>-9</sup>  |
| rs78694549  | 12 | 107,205,456 | <i>RIC8B</i>              | 0.95 5.92×10 <sup>-9</sup>  |
| rs71452928  | 12 | 107,259,529 | <i>RIC8B</i>              | 0.91 1.15×10 <sup>-8</sup>  |
| rs118045072 | 12 | 107,279,615 | <i>RIC8B</i>              | 0.93 8.53×10 <sup>-9</sup>  |
| rs79486147  | 12 | 121,746,542 | <i>ANAPC5</i>             | 0.89 3.24×10 <sup>-8</sup>  |
| rs11838915  | 13 | 22,631,900  | Intergenic                | 0.85 2.30×10 <sup>-8</sup>  |
| rs2146681   | 13 | 22,635,412  | Intergenic                | 0.85 2.30×10 <sup>-8</sup>  |
| rs12859446  | 13 | 22,646,974  | Intergenic                | 0.90 6.70×10 <sup>-9</sup>  |
| rs3927455   | 13 | 43,285,214  | Intergenic                | 0.93 1.62×10 <sup>-9</sup>  |
| rs34760901  | 13 | 46,014,253  | Intergenic                | 0.73 4.44×10 <sup>-8</sup>  |
| rs112539271 | 13 | 46,026,944  | Intergenic                | 0.75 3.69×10 <sup>-8</sup>  |
| rs71431371  | 13 | 46,026,985  | Intergenic                | 0.76 3.21×10 <sup>-8</sup>  |
| rs12877658  | 13 | 46,027,084  | Intergenic                | 0.76 2.93×10 <sup>-8</sup>  |
| rs74873051  | 13 | 46,035,031  | Intergenic                | 0.94 1.37×10 <sup>-9</sup>  |
| rs71431373  | 13 | 46,041,497  | <i>COG3</i>               | 0.77 3.17×10 <sup>-8</sup>  |
| rs71431375  | 13 | 46,042,206  | <i>COG3</i>               | 0.80 1.67×10 <sup>-8</sup>  |
| rs35391963  | 13 | 46,042,998  | <i>COG3</i>               | 0.77 2.87×10 <sup>-8</sup>  |
| rs12585422  | 13 | 46,045,087  | <i>COG3</i>               | 0.77 2.87×10 <sup>-8</sup>  |
| rs12877431  | 13 | 46,048,613  | <i>COG3</i>               | 0.77 2.87×10 <sup>-8</sup>  |
| rs3751352   | 13 | 46,050,658  | <i>COG3</i>               | 0.77 2.87×10 <sup>-8</sup>  |
| rs3829342   | 13 | 46,050,745  | <i>COG3</i>               | 0.77 2.87×10 <sup>-8</sup>  |
| rs3794331   | 13 | 46,053,544  | <i>COG3</i>               | 0.77 2.87×10 <sup>-8</sup>  |
| rs34436430  | 13 | 46,055,795  | <i>COG3</i>               | 0.77 2.87×10 <sup>-8</sup>  |
| rs12583589  | 13 | 46,056,913  | <i>COG3</i>               | 0.77 2.87×10 <sup>-8</sup>  |
| rs12583793  | 13 | 46,057,286  | <i>COG3</i>               | 0.77 2.87×10 <sup>-8</sup>  |
| rs12585290  | 13 | 46,062,159  | <i>COG3</i>               | 0.77 2.87×10 <sup>-8</sup>  |
| rs35772078  | 13 | 46,062,563  | <i>COG3</i>               | 0.75 4.99×10 <sup>-8</sup>  |



|             |    |             |                            |      |                       |
|-------------|----|-------------|----------------------------|------|-----------------------|
| rs12877513  | 13 | 46,062,869  | <i>COG3</i>                | 0.75 | $4.99 \times 10^{-8}$ |
| rs12869186  | 13 | 46,064,675  | <i>COG3</i>                | 0.75 | $4.99 \times 10^{-8}$ |
| rs76888824  | 13 | 46,068,416  | <i>COG3</i>                | 0.75 | $4.99 \times 10^{-8}$ |
| rs12871388  | 13 | 46,068,483  | <i>COG3</i>                | 0.75 | $4.99 \times 10^{-8}$ |
| rs71431379  | 13 | 46,069,203  | <i>COG3</i>                | 0.75 | $4.99 \times 10^{-8}$ |
| rs71431380  | 13 | 46,072,566  | <i>COG3</i>                | 0.75 | $4.99 \times 10^{-8}$ |
| rs35441087  | 13 | 46,075,524  | <i>COG3</i>                | 0.75 | $4.99 \times 10^{-8}$ |
| rs34973279  | 13 | 46,080,863  | <i>COG3</i>                | 0.75 | $4.99 \times 10^{-8}$ |
| rs71431381  | 13 | 46,085,369  | <i>COG3</i>                | 0.75 | $4.99 \times 10^{-8}$ |
| rs34843311  | 13 | 46,088,121  | <i>COG3</i>                | 0.75 | $4.99 \times 10^{-8}$ |
| rs35485445  | 13 | 46,098,728  | <i>COG3</i>                | 0.75 | $4.99 \times 10^{-8}$ |
| rs9652191   | 13 | 46,108,679  | <i>COG3</i>                | 0.75 | $4.99 \times 10^{-8}$ |
| rs9595339   | 13 | 46,108,691  | <i>COG3</i>                | 0.75 | $4.99 \times 10^{-8}$ |
| rs75847672  | 13 | 46,116,436  | <i>ERICH6B</i>             | 0.82 | $9.12 \times 10^{-9}$ |
| rs12430521  | 13 | 71,574,642  | Intergenic                 | 0.94 | $1.04 \times 10^{-9}$ |
| rs77621781  | 13 | 100,498,719 | <i>CLYBL; LOC101927437</i> | 0.86 | $2.88 \times 10^{-8}$ |
| rs76756924  | 13 | 100,511,798 | <i>CLYBL; LOC101927437</i> | 0.92 | $6.60 \times 10^{-9}$ |
| rs12587813  | 14 | 25,170,852  | Intergenic                 | 0.85 | $2.19 \times 10^{-8}$ |
| rs72638491  | 14 | 25,179,546  | Intergenic                 | 0.83 | $4.05 \times 10^{-8}$ |
| rs10135160  | 14 | 25,187,007  | Intergenic                 | 0.83 | $4.05 \times 10^{-8}$ |
| rs61976784  | 14 | 25,187,939  | Intergenic                 | 0.83 | $4.05 \times 10^{-8}$ |
| rs7159732   | 14 | 25,189,706  | Intergenic                 | 0.83 | $4.05 \times 10^{-8}$ |
| rs61976787  | 14 | 25,195,408  | Intergenic                 | 0.83 | $4.05 \times 10^{-8}$ |
| rs72638492  | 14 | 25,196,787  | Intergenic                 | 0.83 | $4.05 \times 10^{-8}$ |
| rs12323449  | 14 | 25,196,793  | Intergenic                 | 0.83 | $4.05 \times 10^{-8}$ |
| rs61976788  | 14 | 25,197,424  | Intergenic                 | 0.83 | $4.05 \times 10^{-8}$ |
| rs147369410 | 14 | 25,201,284  | Intergenic                 | 0.83 | $4.05 \times 10^{-8}$ |
| rs61976791  | 14 | 25,206,801  | Intergenic                 | 0.93 | $6.70 \times 10^{-9}$ |
| rs73288879  | 14 | 51,502,593  | <i>TRIM9</i>               | 0.83 | $2.69 \times 10^{-8}$ |
| rs113785288 | 14 | 51,506,524  | <i>TRIM9</i>               | 0.83 | $2.69 \times 10^{-8}$ |
| rs73288888  | 14 | 51,508,525  | <i>TRIM9</i>               | 0.80 | $4.66 \times 10^{-8}$ |
| rs73288894  | 14 | 51,514,642  | <i>TRIM9</i>               | 0.83 | $2.69 \times 10^{-8}$ |
| rs73288895  | 14 | 51,515,228  | <i>TRIM9</i>               | 0.83 | $2.69 \times 10^{-8}$ |
| rs76481199  | 14 | 51,515,424  | <i>TRIM9</i>               | 0.83 | $2.69 \times 10^{-8}$ |
| rs59978383  | 14 | 51,516,134  | <i>TRIM9</i>               | 0.83 | $2.69 \times 10^{-8}$ |
| rs41525444  | 14 | 55,136,767  | <i>SAMD4A</i>              | 0.85 | $3.62 \times 10^{-8}$ |
| rs17185050  | 14 | 68,046,913  | <i>PLEKHH1</i>             | 0.81 | $3.98 \times 10^{-8}$ |
| rs7148140   | 14 | 88,587,741  | Intergenic                 | 0.87 | $9.99 \times 10^{-9}$ |
| rs111686083 | 14 | 94,565,997  | <i>IFI27L1</i>             | 0.95 | $1.23 \times 10^{-9}$ |
| rs1243163   | 14 | 94,844,706  | <i>SERPINA1</i>            | 0.94 | $2.79 \times 10^{-9}$ |
| rs113040969 | 14 | 94,852,812  | <i>SERPINA1</i>            | 0.94 | $2.79 \times 10^{-9}$ |
| rs112209366 | 14 | 94,874,633  | Intergenic                 | 0.79 | $4.47 \times 10^{-8}$ |
| rs148563267 | 15 | 22,823,001  | Intergenic                 | 0.81 | $3.58 \times 10^{-8}$ |
| rs79461254  | 15 | 22,829,399  | Intergenic                 | 0.81 | $3.24 \times 10^{-8}$ |
| rs148862869 | 15 | 22,831,198  | Intergenic                 | 0.91 | $8.84 \times 10^{-9}$ |
| rs188997843 | 15 | 22,831,822  | Intergenic                 | 0.94 | $4.06 \times 10^{-9}$ |
| rs75194988  | 15 | 64,186,359  | Intergenic                 | 0.96 | $3.97 \times 10^{-9}$ |
| rs72741031  | 15 | 67,198,566  | Intergenic                 | 0.83 | $2.04 \times 10^{-8}$ |
| rs80279633  | 15 | 97,561,675  | Intergenic                 | 0.91 | $3.31 \times 10^{-9}$ |

|             |    |            |             |      |                       |
|-------------|----|------------|-------------|------|-----------------------|
| rs77316226  | 15 | 97,566,542 | Intergenic  | 0.91 | $3.31 \times 10^{-9}$ |
| rs74949876  | 15 | 97,570,531 | Intergenic  | 0.91 | $3.31 \times 10^{-9}$ |
| rs78192416  | 15 | 97,572,117 | Intergenic  | 0.89 | $4.42 \times 10^{-9}$ |
| rs75081365  | 15 | 97,576,106 | Intergenic  | 0.89 | $4.42 \times 10^{-9}$ |
| rs75027914  | 15 | 97,580,025 | Intergenic  | 0.91 | $3.31 \times 10^{-9}$ |
| rs1399070   | 15 | 97,581,901 | Intergenic  | 0.91 | $3.31 \times 10^{-9}$ |
| rs112346031 | 15 | 97,584,663 | Intergenic  | 0.91 | $3.31 \times 10^{-9}$ |
| rs75470401  | 15 | 97,586,599 | Intergenic  | 0.91 | $3.31 \times 10^{-9}$ |
| rs12934777  | 16 | 13,808,752 | Intergenic  | 0.85 | $3.11 \times 10^{-8}$ |
| rs11074571  | 16 | 23,713,065 | <i>ERN2</i> | 0.87 | $2.81 \times 10^{-8}$ |
| rs75025260  | 16 | 78,825,170 | <i>WFOX</i> | 0.86 | $2.32 \times 10^{-8}$ |
| rs117900066 | 16 | 78,825,428 | <i>WFOX</i> | 0.84 | $3.24 \times 10^{-8}$ |
| rs118022621 | 16 | 78,826,034 | <i>WFOX</i> | 0.86 | $2.20 \times 10^{-8}$ |
| rs73575631  | 16 | 78,826,299 | <i>WFOX</i> | 0.86 | $2.20 \times 10^{-8}$ |
| rs7189879   | 16 | 78,826,367 | <i>WFOX</i> | 0.84 | $2.96 \times 10^{-8}$ |
| rs117855422 | 16 | 78,826,747 | <i>WFOX</i> | 0.86 | $2.20 \times 10^{-8}$ |
| rs117276031 | 16 | 78,827,076 | <i>WFOX</i> | 0.86 | $2.20 \times 10^{-8}$ |
| rs117052407 | 16 | 78,827,213 | <i>WFOX</i> | 0.86 | $2.20 \times 10^{-8}$ |
| rs62038631  | 16 | 78,827,528 | <i>WFOX</i> | 0.83 | $3.41 \times 10^{-8}$ |
| rs62038632  | 16 | 78,828,557 | <i>WFOX</i> | 0.83 | $3.41 \times 10^{-8}$ |
| rs62038633  | 16 | 78,828,838 | <i>WFOX</i> | 0.83 | $3.41 \times 10^{-8}$ |
| rs62038634  | 16 | 78,832,101 | <i>WFOX</i> | 0.81 | $3.89 \times 10^{-8}$ |
| rs62038635  | 16 | 78,834,303 | <i>WFOX</i> | 0.83 | $2.65 \times 10^{-8}$ |
| rs62038638  | 16 | 78,834,449 | <i>WFOX</i> | 0.85 | $1.99 \times 10^{-8}$ |
| rs112463288 | 16 | 78,835,122 | <i>WFOX</i> | 0.85 | $1.99 \times 10^{-8}$ |
| rs62038640  | 16 | 78,836,182 | <i>WFOX</i> | 0.85 | $1.99 \times 10^{-8}$ |
| rs62038641  | 16 | 78,836,195 | <i>WFOX</i> | 0.85 | $1.99 \times 10^{-8}$ |
| rs62038642  | 16 | 78,836,219 | <i>WFOX</i> | 0.85 | $1.99 \times 10^{-8}$ |
| rs62038643  | 16 | 78,836,412 | <i>WFOX</i> | 0.83 | $2.89 \times 10^{-8}$ |
| rs62038644  | 16 | 78,836,498 | <i>WFOX</i> | 0.83 | $2.89 \times 10^{-8}$ |
| rs79974905  | 16 | 78,878,405 | <i>WFOX</i> | 0.84 | $3.93 \times 10^{-8}$ |
| rs76362068  | 16 | 78,878,979 | <i>WFOX</i> | 0.86 | $2.12 \times 10^{-8}$ |
| rs112045810 | 16 | 78,879,773 | <i>WFOX</i> | 0.86 | $2.12 \times 10^{-8}$ |
| rs80051429  | 16 | 78,881,302 | <i>WFOX</i> | 0.86 | $2.12 \times 10^{-8}$ |
| rs78788905  | 16 | 78,881,730 | <i>WFOX</i> | 0.86 | $2.12 \times 10^{-8}$ |
| rs13335885  | 16 | 78,882,650 | <i>WFOX</i> | 0.85 | $3.66 \times 10^{-8}$ |
| rs75244456  | 16 | 78,882,894 | <i>WFOX</i> | 0.86 | $2.12 \times 10^{-8}$ |
| rs79676606  | 16 | 78,883,576 | <i>WFOX</i> | 0.83 | $4.68 \times 10^{-8}$ |
| rs76751158  | 16 | 78,883,628 | <i>WFOX</i> | 0.89 | $1.31 \times 10^{-8}$ |
| rs112168623 | 16 | 78,885,583 | <i>WFOX</i> | 0.89 | $1.31 \times 10^{-8}$ |
| rs74035122  | 16 | 78,886,189 | <i>WFOX</i> | 0.83 | $3.80 \times 10^{-8}$ |
| rs148305710 | 16 | 78,888,650 | <i>WFOX</i> | 0.86 | $1.74 \times 10^{-8}$ |
| rs78882345  | 16 | 78,888,872 | <i>WFOX</i> | 0.89 | $1.31 \times 10^{-8}$ |
| rs74576447  | 16 | 78,889,221 | <i>WFOX</i> | 0.89 | $1.31 \times 10^{-8}$ |
| rs79695127  | 16 | 78,894,691 | <i>WFOX</i> | 0.87 | $1.79 \times 10^{-8}$ |
| rs112746092 | 16 | 78,895,750 | <i>WFOX</i> | 0.89 | $1.58 \times 10^{-8}$ |
| rs184871667 | 16 | 78,896,131 | <i>WFOX</i> | 0.91 | $1.27 \times 10^{-8}$ |
| rs76873778  | 16 | 78,896,449 | <i>WFOX</i> | 0.92 | $8.72 \times 10^{-9}$ |
| rs111261059 | 16 | 78,896,852 | <i>WFOX</i> | 0.92 | $8.72 \times 10^{-9}$ |

|               |             |    |             |                     |       |                        |
|---------------|-------------|----|-------------|---------------------|-------|------------------------|
|               | rs78346572  | 16 | 78,897,618  | <i>WWOX</i>         | 0.92  | $8.72 \times 10^{-9}$  |
|               | rs190475654 | 16 | 89,268,380  | Intergenic          | 0.80  | $1.78 \times 10^{-8}$  |
|               | rs137863414 | 17 | 144,412     | <i>RPH3AL</i>       | 0.89  | $2.61 \times 10^{-8}$  |
|               | rs78304829  | 17 | 21,203,820  | <i>MAP2K3</i>       | -1.73 | $4.58 \times 10^{-9}$  |
|               | rs75854955  | 17 | 21,203,825  | <i>MAP2K3</i>       | -1.73 | $4.58 \times 10^{-9}$  |
|               | rs34105301  | 17 | 21,203,893  | <i>MAP2K3</i>       | -1.73 | $4.58 \times 10^{-9}$  |
|               | rs62057672  | 17 | 21,203,934  | <i>MAP2K3</i>       | -1.73 | $4.58 \times 10^{-9}$  |
|               | rs62057673  | 17 | 21,203,949  | <i>MAP2K3</i>       | -1.57 | $2.56 \times 10^{-8}$  |
|               | rs62057674  | 17 | 21,203,998  | <i>MAP2K3</i>       | 1.88  | $1.12 \times 10^{-9}$  |
|               | rs56216806  | 17 | 21,204,192  | <i>MAP2K3</i>       | 1.71  | $1.41 \times 10^{-9}$  |
|               | rs55796947  | 17 | 21,204,210  | <i>MAP2K3</i>       | 1.71  | $1.41 \times 10^{-9}$  |
|               | rs72831582  | 17 | 21,205,406  | <i>MAP2K3</i>       | 1.61  | $4.82 \times 10^{-8}$  |
|               | rs1657695   | 17 | 21,208,413  | <i>MAP2K3</i>       | -1.76 | $2.35 \times 10^{-9}$  |
|               | rs1657684   | 17 | 21,217,411  | <i>MAP2K3</i>       | -1.55 | $4.26 \times 10^{-8}$  |
|               | rs117260204 | 17 | 29,754,079  | <i>RAB11FIP4</i>    | 0.95  | $5.98 \times 10^{-9}$  |
|               | rs143420844 | 17 | 48,503,419  | Intergenic          | 0.94  | $6.21 \times 10^{-9}$  |
|               | rs77582510  | 17 | 71,141,917  | Intergenic          | 0.78  | $4.75 \times 10^{-8}$  |
|               | rs79487192  | 17 | 71,147,296  | Intergenic          | 0.78  | $4.79 \times 10^{-8}$  |
|               | rs138848149 | 18 | 350,797     | <i>COLEC12</i>      | 0.82  | $3.37 \times 10^{-8}$  |
|               | rs117949098 | 18 | 9,668,569   | Intergenic          | 0.84  | $4.90 \times 10^{-8}$  |
|               | rs117333808 | 18 | 31,634,885  | <i>NOLA</i>         | 0.89  | $1.53 \times 10^{-8}$  |
|               | rs117181130 | 18 | 31,643,521  | <i>NOLA</i>         | 0.89  | $1.53 \times 10^{-8}$  |
|               | rs181600518 | 18 | 53,032,497  | <i>TCF4</i>         | 0.93  | $9.42 \times 10^{-9}$  |
|               | rs75654082  | 18 | 67,280,948  | <i>DOK6</i>         | 0.83  | $3.28 \times 10^{-8}$  |
|               | rs72618590  | 19 | 1,037,941   | <i>CNN2</i>         | 0.91  | $5.98 \times 10^{-9}$  |
|               | rs117187726 | 19 | 1,077,674   | <i>HMHA1</i>        | 0.91  | $8.90 \times 10^{-9}$  |
|               | rs7253257   | 19 | 4,228,337   | Intergenic          | 0.98  | $1.88 \times 10^{-9}$  |
|               | rs11671081  | 19 | 20,212,026  | <i>ZNF90</i>        | 1.00  | $1.05 \times 10^{-9}$  |
|               | rs35138704  | 19 | 35,897,981  | <i>LOC100128682</i> | 0.75  | $4.37 \times 10^{-8}$  |
|               | rs117878840 | 19 | 40,238,379  | Intergenic          | 0.88  | $1.40 \times 10^{-8}$  |
|               | rs10408005  | 19 | 44,437,489  | <i>ZNF45</i>        | 0.82  | $1.39 \times 10^{-8}$  |
|               | rs73065065  | 19 | 52,417,100  | Intergenic          | 0.87  | $1.18 \times 10^{-8}$  |
|               | rs73057650  | 19 | 54,198,788  | Intergenic          | 0.85  | $2.68 \times 10^{-8}$  |
|               | rs79854277  | 20 | 29,811,379  | Intergenic          | 1.00  | $1.64 \times 10^{-10}$ |
|               | rs79950712  | 20 | 29,844,516  | Intergenic          | 0.94  | $6.31 \times 10^{-10}$ |
|               | rs76073627  | 20 | 29,844,621  | Intergenic          | 0.94  | $6.31 \times 10^{-10}$ |
|               | rs28448705  | 20 | 61,178,845  | Intergenic          | 0.83  | $3.82 \times 10^{-8}$  |
|               | rs188482663 | 21 | 44,449,827  | <i>PKNOX1</i>       | 0.80  | $4.15 \times 10^{-8}$  |
|               | rs17402286  | 22 | 26,894,879  | <i>TFIP11</i>       | 0.93  | $6.03 \times 10^{-9}$  |
|               | rs17404166  | 22 | 26,969,802  | <i>TPST2</i>        | 0.89  | $1.36 \times 10^{-8}$  |
|               | rs73163286  | 22 | 27,059,724  | <i>MIAT</i>         | 0.92  | $8.73 \times 10^{-9}$  |
|               | rs138027893 | 22 | 32,335,786  | <i>C22orf24</i>     | 0.82  | $3.75 \times 10^{-8}$  |
| <i>PHLPP2</i> | rs56262219  | 8  | 6,142,344   | Intergenic          | 0.68  | $1.88 \times 10^{-8}$  |
| <i>PIK3CA</i> | rs77458083  | 2  | 11,002,868  | Intergenic          | 4.41  | $4.67 \times 10^{-8}$  |
|               | rs9862771   | 3  | 143,828,430 | Intergenic          | 4.64  | $6.70 \times 10^{-9}$  |
|               | rs9841242   | 3  | 143,949,314 | Intergenic          | 6.71  | $1.67 \times 10^{-12}$ |
|               | rs11766153  | 7  | 35,353,014  | Intergenic          | 3.42  | $1.29 \times 10^{-8}$  |
|               | rs2075123   | 7  | 35,354,260  | <i>LOC401324</i>    | 3.24  | $4.57 \times 10^{-8}$  |
|               | rs190184664 | 11 | 401,756     | <i>PKP3</i>         | 4.10  | $4.27 \times 10^{-8}$  |

|                |             |    |             |                   |      |                        |
|----------------|-------------|----|-------------|-------------------|------|------------------------|
|                | rs4768117   | 12 | 39,665,227  | Intergenic        | 4.96 | $3.15 \times 10^{-10}$ |
|                | rs4768736   | 12 | 39,685,533  | Intergenic        | 4.41 | $3.97 \times 10^{-9}$  |
|                | rs1013202   | 12 | 39,697,638  | <i>KIF21A</i>     | 4.30 | $5.64 \times 10^{-9}$  |
|                | rs78090720  | 12 | 39,744,381  | <i>KIF21A</i>     | 4.30 | $5.64 \times 10^{-9}$  |
|                | rs80329996  | 12 | 39,766,618  | <i>KIF21A</i>     | 4.30 | $5.64 \times 10^{-9}$  |
|                | rs76126034  | 12 | 39,948,455  | <i>ABCD2</i>      | 4.34 | $3.16 \times 10^{-9}$  |
|                | rs12423225  | 12 | 39,977,900  | <i>ABCD2</i>      | 4.28 | $5.04 \times 10^{-9}$  |
|                | rs12582802  | 12 | 39,985,206  | <i>ABCD2</i>      | 4.40 | $2.43 \times 10^{-9}$  |
|                | rs16950399  | 15 | 27,997,638  | Intergenic        | 4.62 | $1.67 \times 10^{-8}$  |
|                | rs16950402  | 15 | 28,001,858  | <i>OCA2</i>       | 4.70 | $1.38 \times 10^{-8}$  |
|                | rs73370353  | 15 | 28,002,262  | <i>OCA2</i>       | 4.55 | $2.80 \times 10^{-8}$  |
|                | rs17668418  | 18 | 31,068,387  | Intergenic        | 4.52 | $4.02 \times 10^{-8}$  |
| <i>PIK3R3</i>  | rs111253804 | 7  | 71,006,385  | <i>WBSCR17</i>    | 3.92 | $2.99 \times 10^{-9}$  |
| <i>PPP2CB</i>  | rs7615616   | 3  | 177,219,559 | <i>LINC00578</i>  | 1.09 | $3.33 \times 10^{-8}$  |
|                | rs2133623   | 3  | 177,250,426 | <i>LINC00578</i>  | 1.12 | $4.64 \times 10^{-8}$  |
| <i>PPP2R2C</i> | rs17488560  | 10 | 24,055,881  | <i>KIAA1217</i>   | 0.08 | $1.77 \times 10^{-8}$  |
| <i>PPP2R5A</i> | rs10863953  | 1  | 212,365,800 | Intergenic        | 0.65 | $2.23 \times 10^{-8}$  |
|                | rs7530375   | 1  | 212,371,305 | Intergenic        | 0.64 | $2.84 \times 10^{-8}$  |
|                | rs11119879  | 1  | 212,372,348 | Intergenic        | 0.64 | $2.84 \times 10^{-8}$  |
|                | rs10863954  | 1  | 212,373,286 | Intergenic        | 0.64 | $2.84 \times 10^{-8}$  |
|                | rs1967114   | 1  | 212,375,336 | Intergenic        | 0.65 | $2.09 \times 10^{-8}$  |
|                | rs11119883  | 1  | 212,387,260 | Intergenic        | 0.66 | $1.37 \times 10^{-8}$  |
|                | rs4558048   | 1  | 212,388,789 | Intergenic        | 0.64 | $3.12 \times 10^{-8}$  |
|                | rs12028026  | 1  | 212,390,135 | Intergenic        | 0.66 | $1.76 \times 10^{-8}$  |
| <i>PPP2R5D</i> | rs71500632  | 1  | 71,533,033  | <i>ZRANB2</i>     | 2.48 | $1.16 \times 10^{-8}$  |
|                | rs12748327  | 1  | 71,597,419  | <i>ZRANB2-AS2</i> | 2.49 | $1.52 \times 10^{-8}$  |
|                | rs11578076  | 1  | 71,633,719  | <i>ZRANB2-AS2</i> | 2.42 | $2.06 \times 10^{-8}$  |
|                | rs12085188  | 1  | 106,644,224 | Intergenic        | 2.46 | $3.14 \times 10^{-8}$  |
|                | rs1334484   | 1  | 106,644,303 | Intergenic        | 2.46 | $3.14 \times 10^{-8}$  |
|                | rs12998270  | 2  | 118,995,694 | Intergenic        | 2.62 | $2.80 \times 10^{-8}$  |
|                | rs34766043  | 2  | 119,001,719 | Intergenic        | 2.62 | $2.80 \times 10^{-8}$  |
|                | rs34870009  | 2  | 119,010,835 | Intergenic        | 2.91 | $9.22 \times 10^{-9}$  |
|                | rs67061610  | 2  | 119,059,751 | Intergenic        | 2.80 | $1.89 \times 10^{-8}$  |
|                | rs180985129 | 2  | 129,205,502 | Intergenic        | 2.50 | $7.64 \times 10^{-9}$  |
|                | rs7694095   | 4  | 88,701,214  | Intergenic        | 2.72 | $2.96 \times 10^{-8}$  |
|                | rs55950365  | 5  | 72,601,127  | Intergenic        | 2.23 | $1.36 \times 10^{-8}$  |
|                | rs74863536  | 6  | 136,778,260 | <i>MAP7</i>       | 2.22 | $4.11 \times 10^{-8}$  |
|                | rs76061187  | 7  | 13,293,857  | Intergenic        | 3.07 | $3.34 \times 10^{-9}$  |
|                | rs112100380 | 9  | 98,202,016  | Intergenic        | 2.90 | $1.46 \times 10^{-8}$  |
|                | rs78309973  | 9  | 111,941,810 | <i>EPB41LAB</i>   | 2.90 | $4.55 \times 10^{-8}$  |
|                | rs12376648  | 9  | 111,950,394 | <i>EPB41LAB</i>   | 2.90 | $4.55 \times 10^{-8}$  |
|                | rs73517300  | 9  | 111,952,926 | <i>EPB41LAB</i>   | 2.90 | $4.55 \times 10^{-8}$  |
|                | rs73519210  | 9  | 111,956,157 | <i>EPB41LAB</i>   | 2.90 | $4.55 \times 10^{-8}$  |
|                | rs10979741  | 9  | 111,956,494 | <i>EPB41LAB</i>   | 2.90 | $4.55 \times 10^{-8}$  |
|                | rs10979743  | 9  | 111,957,173 | <i>EPB41LAB</i>   | 2.90 | $4.55 \times 10^{-8}$  |
|                | rs10816783  | 9  | 111,958,426 | <i>EPB41LAB</i>   | 2.90 | $4.55 \times 10^{-8}$  |
|                | rs79727364  | 9  | 111,964,694 | <i>EPB41LAB</i>   | 2.90 | $4.55 \times 10^{-8}$  |
|                | rs7026902   | 9  | 111,965,202 | <i>EPB41LAB</i>   | 2.90 | $4.55 \times 10^{-8}$  |
|                | rs10979744  | 9  | 111,966,928 | <i>EPB41LAB</i>   | 2.90 | $4.55 \times 10^{-8}$  |

|                |             |    |             |                              |      |                        |
|----------------|-------------|----|-------------|------------------------------|------|------------------------|
|                | rs10979745  | 9  | 111,968,861 | <i>EPB41LAB</i>              | 2.90 | $4.55 \times 10^{-8}$  |
|                | rs10979746  | 9  | 111,968,934 | <i>EPB41LAB</i>              | 2.90 | $4.55 \times 10^{-8}$  |
|                | rs10979747  | 9  | 111,969,135 | <i>EPB41LAB</i>              | 2.90 | $4.55 \times 10^{-8}$  |
|                | rs112867677 | 9  | 111,977,792 | <i>EPB41LAB</i>              | 2.86 | $3.89 \times 10^{-8}$  |
|                | rs149938415 | 10 | 87,346,847  | <i>GRID1-ASI</i>             | 2.92 | $1.07 \times 10^{-8}$  |
|                | rs77976920  | 10 | 87,356,377  | <i>GRID1-ASI</i>             | 2.92 | $1.07 \times 10^{-8}$  |
|                | rs76088362  | 10 | 87,629,180  | <i>GRID1</i>                 | 3.10 | $6.65 \times 10^{-9}$  |
|                | rs182533869 | 11 | 23,007,867  | Intergenic                   | 3.03 | $2.48 \times 10^{-9}$  |
|                | rs76663324  | 13 | 62,062,128  | Intergenic                   | 2.36 | $3.10 \times 10^{-8}$  |
|                | rs77825385  | 14 | 59,324,562  | <i>LOC102723742</i>          | 3.01 | $1.53 \times 10^{-8}$  |
|                | rs11637534  | 15 | 41,208,139  | Intergenic                   | 3.31 | $2.63 \times 10^{-10}$ |
| <i>PRKCA</i>   | rs10753542  | 1  | 23,065,902  | <i>EPHB2</i>                 | 0.62 | $1.95 \times 10^{-10}$ |
|                | rs75877521  | 2  | 306,489     | Intergenic                   | 0.45 | $3.93 \times 10^{-8}$  |
|                | rs11678872  | 2  | 45,568,888  | Intergenic                   | 0.61 | $1.24 \times 10^{-8}$  |
|                | rs74491823  | 3  | 143,593,286 | Intergenic                   | 0.72 | $1.75 \times 10^{-11}$ |
|                | rs35190805  | 3  | 146,587,878 | Intergenic                   | 0.50 | $1.20 \times 10^{-8}$  |
|                | rs13133632  | 4  | 70,197,624  | Intergenic                   | 0.51 | $1.50 \times 10^{-8}$  |
|                | rs73818525  | 5  | 158,863,387 | Intergenic                   | 0.57 | $8.27 \times 10^{-9}$  |
|                | rs112629596 | 6  | 48,904,398  | Intergenic                   | 0.60 | $8.19 \times 10^{-10}$ |
|                | rs9457557   | 6  | 159,545,322 | Intergenic                   | 0.67 | $3.30 \times 10^{-10}$ |
|                | rs62431955  | 6  | 159,545,755 | Intergenic                   | 0.67 | $6.06 \times 10^{-10}$ |
|                | rs56383199  | 6  | 159,551,255 | Intergenic                   | 0.67 | $6.06 \times 10^{-10}$ |
|                | rs61197787  | 6  | 159,551,624 | Intergenic                   | 0.67 | $3.30 \times 10^{-10}$ |
|                | rs76683707  | 7  | 10,135,723  | Intergenic                   | 0.57 | $2.00 \times 10^{-8}$  |
|                | rs10963435  | 9  | 18,076,712  | Intergenic                   | 0.73 | $8.95 \times 10^{-12}$ |
|                | rs10963444  | 9  | 18,094,734  | Intergenic                   | 0.63 | $5.56 \times 10^{-9}$  |
|                | rs117450265 | 9  | 128,823,268 | Intergenic                   | 0.45 | $1.87 \times 10^{-8}$  |
|                | rs11010962  | 10 | 37,249,196  | Intergenic                   | 0.54 | $4.59 \times 10^{-8}$  |
|                | rs699575    | 12 | 63,294,839  | <i>PPMIH</i>                 | 0.55 | $1.04 \times 10^{-8}$  |
|                | rs182946220 | 14 | 53,313,177  | Intergenic                   | 0.64 | $2.68 \times 10^{-9}$  |
|                | rs186910020 | 14 | 53,313,181  | Intergenic                   | 0.57 | $3.35 \times 10^{-8}$  |
|                | rs113386802 | 17 | 768,645     | <i>NXN</i>                   | 0.60 | $2.12 \times 10^{-8}$  |
|                | rs75396458  | 17 | 769,249     | <i>NXN</i>                   | 0.60 | $2.12 \times 10^{-8}$  |
|                | rs77993536  | 20 | 62,296,349  | <i>RTEL1; RTEL1-TNFRSF6B</i> | 0.54 | $2.78 \times 10^{-9}$  |
| <i>PTK2</i>    | rs9729600   | 1  | 2,024,507   | <i>PRKCZ</i>                 | 4.31 | $4.02 \times 10^{-10}$ |
|                | rs3128329   | 1  | 2,029,392   | <i>PRKCZ</i>                 | 3.44 | $4.88 \times 10^{-8}$  |
|                | rs113156794 | 3  | 22,078,400  | Intergenic                   | 4.41 | $4.23 \times 10^{-8}$  |
| <i>RPS6KB1</i> | rs185916002 | 8  | 119,564,946 | <i>SAMD12</i>                | 1.61 | $6.85 \times 10^{-9}$  |
|                | rs190838060 | 8  | 119,564,948 | <i>SAMD12</i>                | 1.66 | $4.05 \times 10^{-9}$  |
| <i>RPTOR</i>   | rs7443309   | 5  | 175,476,562 | Intergenic                   | 0.79 | $1.88 \times 10^{-8}$  |
|                | rs77741484  | 11 | 97,370,026  | Intergenic                   | 1.14 | $3.90 \times 10^{-8}$  |
|                | rs117396230 | 11 | 97,370,648  | Intergenic                   | 1.14 | $3.90 \times 10^{-8}$  |
|                | rs117709668 | 11 | 97,370,709  | Intergenic                   | 1.14 | $3.90 \times 10^{-8}$  |
|                | rs76791180  | 11 | 97,372,432  | Intergenic                   | 1.14 | $3.90 \times 10^{-8}$  |
|                | rs77459416  | 11 | 97,373,747  | Intergenic                   | 1.14 | $3.90 \times 10^{-8}$  |
|                | rs79673239  | 18 | 1,027,510   | Intergenic                   | 1.03 | $1.94 \times 10^{-8}$  |
| <i>SGK1</i>    | rs117934587 | 11 | 68,729,371  | Intergenic                   | 2.73 | $4.48 \times 10^{-9}$  |
| <i>SGK2</i>    | rs74450793  | 2  | 204,862,815 | Intergenic                   | 0.05 | $1.78 \times 10^{-8}$  |
| <i>SGK3</i>    | rs1420890   | 4  | 161,745,664 | Intergenic                   | 0.80 | $2.93 \times 10^{-11}$ |

|             |             |    |             |                            |       |                        |
|-------------|-------------|----|-------------|----------------------------|-------|------------------------|
| <i>SPP1</i> | rs6824554   | 4  | 176,589,648 | <i>GPM6A</i>               | 0.12  | $4.62 \times 10^{-8}$  |
|             | rs3776990   | 5  | 153,784,806 | <i>GALNT10; SAP30L-AS1</i> | 0.13  | $2.65 \times 10^{-8}$  |
|             | rs4958734   | 5  | 153,789,505 | <i>GALNT10; SAP30L-AS1</i> | 0.15  | $3.70 \times 10^{-9}$  |
|             | rs7702161   | 5  | 153,790,949 | <i>GALNT10; SAP30L-AS1</i> | 0.15  | $1.93 \times 10^{-9}$  |
|             | rs192934414 | 12 | 96,494,950  | Intergenic                 | 0.10  | $4.54 \times 10^{-8}$  |
|             | rs76978746  | 13 | 84,207,570  | Intergenic                 | 0.15  | $4.34 \times 10^{-8}$  |
|             | rs79234512  | 13 | 84,211,622  | Intergenic                 | 0.15  | $4.34 \times 10^{-8}$  |
|             | rs76515201  | 13 | 84,216,551  | Intergenic                 | 0.15  | $3.49 \times 10^{-8}$  |
| <i>SYK</i>  | rs94626     | 9  | 93,543,203  | Intergenic                 | 2.86  | $2.35 \times 10^{-10}$ |
|             | rs290276    | 9  | 93,545,268  | Intergenic                 | -3.45 | $5.92 \times 10^{-14}$ |
|             | rs290274    | 9  | 93,546,913  | Intergenic                 | -3.43 | $7.39 \times 10^{-14}$ |
|             | rs188313    | 9  | 93,548,302  | Intergenic                 | -3.43 | $7.39 \times 10^{-14}$ |
|             | rs290271    | 9  | 93,551,619  | Intergenic                 | -3.43 | $7.39 \times 10^{-14}$ |
|             | rs290268    | 9  | 93,552,450  | Intergenic                 | -3.47 | $5.53 \times 10^{-14}$ |
|             | rs10448310  | 9  | 93,556,174  | Intergenic                 | 2.59  | $2.09 \times 10^{-8}$  |
|             | rs10821504  | 9  | 93,556,995  | Intergenic                 | 2.73  | $2.09 \times 10^{-8}$  |
|             | rs1333637   | 9  | 93,557,066  | Intergenic                 | 2.58  | $2.44 \times 10^{-8}$  |
|             | rs10993693  | 9  | 93,557,698  | Intergenic                 | 2.59  | $2.09 \times 10^{-8}$  |
|             | rs290997    | 9  | 93,559,351  | Intergenic                 | -3.50 | $2.00 \times 10^{-14}$ |
|             | rs290995    | 9  | 93,559,477  | Intergenic                 | -3.51 | $1.35 \times 10^{-14}$ |
|             | rs290994    | 9  | 93,559,515  | Intergenic                 | -3.50 | $2.00 \times 10^{-14}$ |
|             | rs290993    | 9  | 93,559,572  | Intergenic                 | -3.47 | $3.28 \times 10^{-14}$ |
|             | rs772407    | 9  | 93,560,850  | Intergenic                 | -3.50 | $2.00 \times 10^{-14}$ |
|             | rs290992    | 9  | 93,561,309  | Intergenic                 | 3.48  | $4.02 \times 10^{-14}$ |
|             | rs290991    | 9  | 93,561,450  | Intergenic                 | -3.50 | $2.00 \times 10^{-14}$ |
|             | rs290990    | 9  | 93,561,695  | Intergenic                 | -3.50 | $2.00 \times 10^{-14}$ |
|             | rs290989    | 9  | 93,561,836  | Intergenic                 | -3.50 | $2.00 \times 10^{-14}$ |
|             | rs290988    | 9  | 93,562,955  | Intergenic                 | -3.50 | $2.00 \times 10^{-14}$ |
|             | rs290987    | 9  | 93,563,267  | Intergenic                 | -3.50 | $2.00 \times 10^{-14}$ |
|             | rs2562397   | 9  | 93,563,992  | <i>SYK</i>                 | -3.50 | $2.00 \times 10^{-14}$ |
|             | rs1319677   | 9  | 93,565,999  | <i>SYK</i>                 | -3.38 | $9.99 \times 10^{-14}$ |
|             | rs1333635   | 9  | 93,566,406  | <i>SYK</i>                 | -3.36 | $1.21 \times 10^{-13}$ |
|             | rs2780701   | 9  | 93,567,281  | <i>SYK</i>                 | -3.29 | $3.54 \times 10^{-13}$ |
|             | rs2562396   | 9  | 93,567,425  | <i>SYK</i>                 | -3.29 | $3.54 \times 10^{-13}$ |
|             | rs2774260   | 9  | 93,567,472  | <i>SYK</i>                 | -3.29 | $3.54 \times 10^{-13}$ |
|             | rs1333634   | 9  | 93,567,503  | <i>SYK</i>                 | -3.29 | $3.54 \times 10^{-13}$ |
|             | rs1333633   | 9  | 93,567,572  | <i>SYK</i>                 | 3.29  | $6.61 \times 10^{-13}$ |
|             | rs919386    | 9  | 93,567,607  | <i>SYK</i>                 | 3.24  | $1.19 \times 10^{-12}$ |
|             | rs1333632   | 9  | 93,567,732  | <i>SYK</i>                 | 3.31  | $3.68 \times 10^{-13}$ |
|             | rs2613308   | 9  | 93,567,773  | <i>SYK</i>                 | -3.33 | $3.27 \times 10^{-13}$ |
|             | rs2780702   | 9  | 93,567,783  | <i>SYK</i>                 | -3.33 | $3.27 \times 10^{-13}$ |
|             | rs17488335  | 9  | 93,567,958  | <i>SYK</i>                 | -3.30 | $3.63 \times 10^{-9}$  |
|             | rs62554850  | 9  | 93,568,122  | <i>SYK</i>                 | -3.44 | $7.49 \times 10^{-10}$ |
|             | rs4501705   | 9  | 93,568,534  | <i>SYK</i>                 | -3.26 | $2.54 \times 10^{-9}$  |
|             | rs2126051   | 9  | 93,569,001  | <i>SYK</i>                 | -3.45 | $6.20 \times 10^{-10}$ |
|             | rs2115485   | 9  | 93,569,254  | <i>SYK</i>                 | -3.45 | $6.20 \times 10^{-10}$ |
|             | rs2115484   | 9  | 93,569,328  | <i>SYK</i>                 | -3.46 | $6.12 \times 10^{-10}$ |
|             | rs10821508  | 9  | 93,569,500  | <i>SYK</i>                 | -3.45 | $6.20 \times 10^{-10}$ |
|             | rs12553524  | 9  | 93,569,646  | <i>SYK</i>                 | -3.45 | $6.20 \times 10^{-10}$ |

|              |    |             |               |       |                        |
|--------------|----|-------------|---------------|-------|------------------------|
| rs4002565    | 9  | 93,569,810  | <i>SYK</i>    | -3.49 | $4.32 \times 10^{-10}$ |
| rs4002564    | 9  | 93,569,818  | <i>SYK</i>    | -3.49 | $4.47 \times 10^{-10}$ |
| rs1460834    | 9  | 93,570,060  | <i>SYK</i>    | -3.45 | $6.59 \times 10^{-10}$ |
| rs1460835    | 9  | 93,570,190  | <i>SYK</i>    | -3.45 | $6.20 \times 10^{-10}$ |
| rs58668584   | 9  | 93,570,432  | <i>SYK</i>    | -3.44 | $7.02 \times 10^{-10}$ |
| rs7046316    | 9  | 93,570,602  | <i>SYK</i>    | -3.45 | $6.20 \times 10^{-10}$ |
| rs7046173    | 9  | 93,571,124  | <i>SYK</i>    | -3.45 | $6.20 \times 10^{-10}$ |
| rs7046193    | 9  | 93,571,160  | <i>SYK</i>    | -3.45 | $6.20 \times 10^{-10}$ |
| rs3789890    | 9  | 93,571,427  | <i>SYK</i>    | -3.45 | $6.20 \times 10^{-10}$ |
| rs3789891    | 9  | 93,571,514  | <i>SYK</i>    | -3.45 | $6.20 \times 10^{-10}$ |
| rs3789892    | 9  | 93,571,559  | <i>SYK</i>    | -3.45 | $6.20 \times 10^{-10}$ |
| rs12551275   | 9  | 93,572,123  | <i>SYK</i>    | -3.45 | $6.20 \times 10^{-10}$ |
| rs7032733    | 9  | 93,572,345  | <i>SYK</i>    | -3.45 | $6.20 \times 10^{-10}$ |
| rs7020331    | 9  | 93,572,543  | <i>SYK</i>    | -3.40 | $1.04 \times 10^{-9}$  |
| rs11788207   | 9  | 93,572,856  | <i>SYK</i>    | -3.45 | $6.20 \times 10^{-10}$ |
| rs2042984    | 9  | 93,573,095  | <i>SYK</i>    | -3.45 | $6.20 \times 10^{-10}$ |
| rs2042983    | 9  | 93,573,162  | <i>SYK</i>    | -3.45 | $6.20 \times 10^{-10}$ |
| rs2162977    | 9  | 93,573,489  | <i>SYK</i>    | -3.51 | $5.03 \times 10^{-10}$ |
| <i>THBS1</i> |    |             |               |       |                        |
| rs77596211   | 1  | 185,393,593 | Intergenic    | 0.22  | $3.04 \times 10^{-8}$  |
| rs142050687  | 2  | 80,113,679  | <i>CTNNA2</i> | 0.24  | $1.73 \times 10^{-8}$  |
| rs35674887   | 2  | 103,482,305 | Intergenic    | 0.24  | $1.84 \times 10^{-10}$ |
| rs73039349   | 3  | 18,857,954  | Intergenic    | 0.30  | $9.77 \times 10^{-10}$ |
| rs73469723   | 6  | 47,739,014  | Intergenic    | 0.26  | $2.64 \times 10^{-8}$  |
| rs73469733   | 6  | 47,745,062  | Intergenic    | 0.26  | $2.64 \times 10^{-8}$  |
| rs73469739   | 6  | 47,746,798  | Intergenic    | 0.25  | $3.20 \times 10^{-8}$  |
| rs4098287    | 6  | 47,757,598  | <i>OPN5</i>   | 0.24  | $4.15 \times 10^{-8}$  |
| rs6458594    | 6  | 47,767,452  | <i>OPN5</i>   | 0.27  | $1.56 \times 10^{-8}$  |
| rs7766520    | 6  | 47,768,443  | <i>OPN5</i>   | 0.27  | $1.56 \times 10^{-8}$  |
| rs142854523  | 6  | 47,786,461  | <i>OPN5</i>   | 0.26  | $4.71 \times 10^{-8}$  |
| rs140354855  | 6  | 47,788,697  | <i>OPN5</i>   | 0.26  | $4.71 \times 10^{-8}$  |
| rs140905188  | 6  | 47,790,787  | <i>OPN5</i>   | 0.26  | $4.71 \times 10^{-8}$  |
| rs55683950   | 6  | 47,793,688  | <i>OPN5</i>   | 0.26  | $4.71 \times 10^{-8}$  |
| rs116523017  | 6  | 47,794,640  | Intergenic    | 0.26  | $4.71 \times 10^{-8}$  |
| rs111415861  | 6  | 47,868,831  | <i>PTCHD4</i> | 0.25  | $2.96 \times 10^{-8}$  |
| rs77803641   | 6  | 47,876,110  | <i>PTCHD4</i> | 0.27  | $3.57 \times 10^{-9}$  |
| rs79486983   | 6  | 47,876,566  | <i>PTCHD4</i> | 0.27  | $3.57 \times 10^{-9}$  |
| rs77139175   | 6  | 47,877,032  | <i>PTCHD4</i> | 0.27  | $3.57 \times 10^{-9}$  |
| rs78764095   | 6  | 47,880,331  | <i>PTCHD4</i> | 0.28  | $7.98 \times 10^{-10}$ |
| rs78630456   | 6  | 47,880,383  | <i>PTCHD4</i> | 0.28  | $7.98 \times 10^{-10}$ |
| rs74939207   | 6  | 47,881,542  | <i>PTCHD4</i> | 0.28  | $7.98 \times 10^{-10}$ |
| rs77910861   | 6  | 47,881,866  | <i>PTCHD4</i> | 0.28  | $7.98 \times 10^{-10}$ |
| rs28436057   | 11 | 67,450,926  | Intergenic    | 0.26  | $1.16 \times 10^{-8}$  |
| rs12272021   | 11 | 67,451,636  | Intergenic    | 0.26  | $1.16 \times 10^{-8}$  |
| rs4435009    | 11 | 67,452,345  | Intergenic    | 0.26  | $2.46 \times 10^{-8}$  |
| rs12273945   | 11 | 67,452,860  | Intergenic    | 0.26  | $1.16 \times 10^{-8}$  |
| rs12277666   | 11 | 67,454,567  | Intergenic    | 0.26  | $1.30 \times 10^{-8}$  |
| rs12279483   | 11 | 67,455,738  | Intergenic    | 0.26  | $1.16 \times 10^{-8}$  |
| rs61450467   | 11 | 67,458,462  | Intergenic    | 0.26  | $1.16 \times 10^{-8}$  |
| rs2514046    | 11 | 67,459,163  | Intergenic    | 0.26  | $2.46 \times 10^{-8}$  |

|              |             |    |             |               |      |                        |
|--------------|-------------|----|-------------|---------------|------|------------------------|
|              | rs2447574   | 11 | 67,459,179  | Intergenic    | 0.26 | $2.46 \times 10^{-8}$  |
|              | rs4930482   | 11 | 67,460,529  | Intergenic    | 0.26 | $2.46 \times 10^{-8}$  |
|              | rs73159087  | 13 | 23,467,408  | Intergenic    | 0.26 | $1.41 \times 10^{-8}$  |
|              | rs112624055 | 15 | 61,494,341  | <i>RORA</i>   | 0.26 | $2.95 \times 10^{-8}$  |
|              | rs113955400 | 15 | 61,494,354  | <i>RORA</i>   | 0.26 | $2.95 \times 10^{-8}$  |
|              | rs79142868  | 18 | 73,695,242  | Intergenic    | 0.21 | $3.08 \times 10^{-9}$  |
|              | rs75850871  | 18 | 73,695,643  | Intergenic    | 0.21 | $6.41 \times 10^{-9}$  |
|              | rs74259264  | 18 | 73,702,385  | Intergenic    | 0.22 | $1.53 \times 10^{-9}$  |
|              | rs17058680  | 18 | 73,702,786  | Intergenic    | 0.21 | $1.36 \times 10^{-8}$  |
|              | rs11872245  | 18 | 73,705,389  | Intergenic    | 0.21 | $1.36 \times 10^{-8}$  |
|              | rs11872247  | 18 | 73,705,421  | Intergenic    | 0.21 | $1.36 \times 10^{-8}$  |
|              | rs17058694  | 18 | 73,706,015  | Intergenic    | 0.21 | $1.36 \times 10^{-8}$  |
|              | rs79467161  | 18 | 73,709,292  | Intergenic    | 0.21 | $9.79 \times 10^{-9}$  |
|              | rs75649221  | 18 | 73,710,923  | Intergenic    | 0.21 | $9.79 \times 10^{-9}$  |
|              | rs117222991 | 18 | 73,711,197  | Intergenic    | 0.21 | $9.79 \times 10^{-9}$  |
|              | rs74524122  | 18 | 73,715,052  | Intergenic    | 0.25 | $9.35 \times 10^{-12}$ |
|              | rs59615307  | 18 | 73,715,519  | Intergenic    | 0.22 | $7.16 \times 10^{-9}$  |
|              | rs77891592  | 18 | 73,721,195  | Intergenic    | 0.20 | $3.67 \times 10^{-8}$  |
|              | rs1021997   | 18 | 73,721,453  | Intergenic    | 0.21 | $2.08 \times 10^{-8}$  |
|              | rs17252748  | 18 | 73,724,463  | Intergenic    | 0.21 | $2.08 \times 10^{-8}$  |
|              | rs76232710  | 18 | 73,729,959  | Intergenic    | 0.21 | $2.08 \times 10^{-8}$  |
|              | rs17058711  | 18 | 73,730,213  | Intergenic    | 0.21 | $2.08 \times 10^{-8}$  |
|              | rs61263430  | 18 | 73,738,823  | Intergenic    | 0.20 | $3.67 \times 10^{-8}$  |
|              | rs17058719  | 18 | 73,740,261  | Intergenic    | 0.20 | $3.67 \times 10^{-8}$  |
|              | rs74680368  | 18 | 73,740,708  | Intergenic    | 0.20 | $3.67 \times 10^{-8}$  |
|              | rs17338384  | 18 | 73,741,610  | Intergenic    | 0.20 | $3.67 \times 10^{-8}$  |
|              | rs75377303  | 18 | 73,742,541  | Intergenic    | 0.20 | $3.30 \times 10^{-8}$  |
|              | rs61691938  | 21 | 37,603,942  | <i>DOPEY2</i> | 0.22 | $1.22 \times 10^{-9}$  |
|              | rs2284633   | 21 | 37,604,665  | <i>DOPEY2</i> | 0.22 | $1.22 \times 10^{-9}$  |
|              | rs147393817 | 21 | 37,607,934  | <i>DOPEY2</i> | 0.22 | $1.22 \times 10^{-9}$  |
|              | rs13054662  | 22 | 29,642,012  | <i>EMIDI</i>  | 0.26 | $3.17 \times 10^{-8}$  |
|              | rs13056227  | 22 | 29,645,556  | <i>EMIDI</i>  | 0.25 | $4.12 \times 10^{-8}$  |
|              | rs8136401   | 22 | 29,650,993  | <i>EMIDI</i>  | 0.26 | $2.37 \times 10^{-8}$  |
|              | rs34662558  | 22 | 29,653,410  | <i>EMIDI</i>  | 0.26 | $1.94 \times 10^{-8}$  |
|              | rs13056534  | 22 | 29,807,863  | Intergenic    | 0.25 | $2.72 \times 10^{-8}$  |
| <i>THBS2</i> | rs6593746   | 1  | 146,686,649 | <i>FMO5</i>   | 0.05 | $4.57 \times 10^{-8}$  |
|              | rs141715081 | 1  | 146,779,089 | Intergenic    | 0.05 | $4.32 \times 10^{-8}$  |
|              | rs75310765  | 1  | 146,779,915 | Intergenic    | 0.06 | $2.06 \times 10^{-8}$  |
| <i>TNN</i>   | rs75004160  | 4  | 62,250,512  | Intergenic    | 0.21 | $4.16 \times 10^{-8}$  |
| <i>TSC2</i>  | rs150412385 | 1  | 17,771,845  | Intergenic    | 6.20 | $3.70 \times 10^{-8}$  |
|              | rs189438727 | 4  | 138,211,649 | Intergenic    | 7.01 | $1.63 \times 10^{-8}$  |
|              | rs73196291  | 7  | 108,960,971 | Intergenic    | 4.33 | $4.90 \times 10^{-8}$  |
|              | rs10236328  | 7  | 108,965,422 | Intergenic    | 4.44 | $3.88 \times 10^{-8}$  |
|              | rs10241388  | 7  | 108,967,169 | Intergenic    | 4.52 | $2.32 \times 10^{-8}$  |
|              | rs7784033   | 7  | 108,968,289 | Intergenic    | 4.76 | $1.47 \times 10^{-8}$  |
|              | rs10257229  | 7  | 108,969,055 | Intergenic    | 4.51 | $3.39 \times 10^{-8}$  |
|              | rs56695851  | 7  | 108,970,712 | Intergenic    | 4.55 | $2.83 \times 10^{-8}$  |
|              | rs848845    | 7  | 109,000,649 | Intergenic    | 4.40 | $1.48 \times 10^{-8}$  |
|              | rs848844    | 7  | 109,000,669 | Intergenic    | 4.40 | $1.48 \times 10^{-8}$  |



|             |    |             |                |      |                       |
|-------------|----|-------------|----------------|------|-----------------------|
| rs10277209  | 7  | 109,003,574 | Intergenic     | 4.41 | $2.43 \times 10^{-8}$ |
| rs12669457  | 7  | 109,003,780 | Intergenic     | 4.40 | $1.48 \times 10^{-8}$ |
| rs1881445   | 7  | 109,005,041 | Intergenic     | 4.27 | $2.41 \times 10^{-8}$ |
| rs2204697   | 7  | 109,007,156 | Intergenic     | 4.27 | $2.41 \times 10^{-8}$ |
| rs66766955  | 7  | 109,007,642 | Intergenic     | 4.38 | $2.81 \times 10^{-8}$ |
| rs1406296   | 7  | 109,012,340 | Intergenic     | 4.38 | $2.81 \times 10^{-8}$ |
| rs1406297   | 7  | 109,012,375 | Intergenic     | 4.27 | $2.41 \times 10^{-8}$ |
| rs11763389  | 7  | 109,013,378 | Intergenic     | 4.27 | $2.41 \times 10^{-8}$ |
| rs7778753   | 7  | 109,013,749 | Intergenic     | 4.27 | $2.41 \times 10^{-8}$ |
| rs7798705   | 7  | 109,014,214 | Intergenic     | 4.27 | $2.41 \times 10^{-8}$ |
| rs56240857  | 7  | 109,019,236 | Intergenic     | 4.38 | $2.81 \times 10^{-8}$ |
| rs1581661   | 7  | 109,019,420 | Intergenic     | 4.27 | $2.41 \times 10^{-8}$ |
| rs6960556   | 7  | 109,019,960 | Intergenic     | 4.27 | $2.41 \times 10^{-8}$ |
| rs66775503  | 7  | 109,020,429 | Intergenic     | 4.38 | $2.81 \times 10^{-8}$ |
| rs7798394   | 7  | 109,020,695 | Intergenic     | 4.27 | $2.41 \times 10^{-8}$ |
| rs4730379   | 7  | 109,021,661 | Intergenic     | 4.27 | $2.41 \times 10^{-8}$ |
| rs149650943 | 7  | 109,022,630 | Intergenic     | 4.41 | $2.44 \times 10^{-8}$ |
| rs147324976 | 7  | 109,022,702 | Intergenic     | 4.50 | $1.70 \times 10^{-8}$ |
| rs7794651   | 7  | 109,028,297 | Intergenic     | 4.27 | $2.41 \times 10^{-8}$ |
| rs16885699  | 7  | 109,034,609 | Intergenic     | 4.40 | $1.48 \times 10^{-8}$ |
| rs13309729  | 7  | 109,034,692 | Intergenic     | 4.40 | $1.48 \times 10^{-8}$ |
| rs4730384   | 7  | 109,039,061 | Intergenic     | 4.32 | $1.20 \times 10^{-8}$ |
| rs1528536   | 7  | 109,039,712 | Intergenic     | 4.32 | $1.84 \times 10^{-8}$ |
| rs4454216   | 7  | 109,040,135 | Intergenic     | 4.32 | $1.84 \times 10^{-8}$ |
| rs12531719  | 7  | 109,047,058 | Intergenic     | 4.44 | $1.12 \times 10^{-8}$ |
| rs12705585  | 7  | 109,049,072 | Intergenic     | 4.44 | $1.12 \times 10^{-8}$ |
| rs4730385   | 7  | 109,049,758 | Intergenic     | 4.35 | $1.82 \times 10^{-8}$ |
| rs1406301   | 7  | 109,052,753 | Intergenic     | 4.44 | $1.12 \times 10^{-8}$ |
| rs9791486   | 7  | 109,053,208 | Intergenic     | 4.44 | $1.12 \times 10^{-8}$ |
| rs9791889   | 7  | 109,053,491 | Intergenic     | 4.44 | $1.12 \times 10^{-8}$ |
| rs2396099   | 7  | 109,053,967 | Intergenic     | 4.44 | $1.12 \times 10^{-8}$ |
| rs1590077   | 7  | 109,060,671 | Intergenic     | 4.44 | $1.12 \times 10^{-8}$ |
| rs1590078   | 7  | 109,060,758 | Intergenic     | 4.44 | $1.12 \times 10^{-8}$ |
| rs12705586  | 7  | 109,062,226 | Intergenic     | 4.44 | $1.12 \times 10^{-8}$ |
| rs73198437  | 7  | 109,069,417 | Intergenic     | 4.39 | $1.53 \times 10^{-8}$ |
| rs73198438  | 7  | 109,069,564 | Intergenic     | 4.39 | $1.53 \times 10^{-8}$ |
| rs11983814  | 7  | 109,071,166 | Intergenic     | 4.39 | $1.53 \times 10^{-8}$ |
| rs11982074  | 7  | 109,072,929 | Intergenic     | 4.39 | $1.53 \times 10^{-8}$ |
| rs11763160  | 7  | 109,074,474 | Intergenic     | 4.39 | $1.53 \times 10^{-8}$ |
| rs12532946  | 7  | 109,075,053 | Intergenic     | 4.39 | $1.53 \times 10^{-8}$ |
| rs10278820  | 7  | 109,079,428 | Intergenic     | 4.39 | $1.53 \times 10^{-8}$ |
| rs10256936  | 7  | 109,085,010 | Intergenic     | 4.41 | $6.27 \times 10^{-9}$ |
| rs190031944 | 10 | 87,277,598  | Intergenic     | 5.51 | $2.11 \times 10^{-8}$ |
| rs72875663  | 11 | 25,356,126  | Intergenic     | 6.81 | $2.55 \times 10^{-8}$ |
| rs35182105  | 12 | 24,572,337  | <i>SOX5</i>    | 6.16 | $4.93 \times 10^{-8}$ |
| rs4926276   | 19 | 13,459,988  | <i>CACNA1A</i> | 5.54 | $4.08 \times 10^{-9}$ |
| rs4926155   | 19 | 13,460,244  | <i>CACNA1A</i> | 5.37 | $9.73 \times 10^{-9}$ |
| rs4926277   | 19 | 13,460,986  | <i>CACNA1A</i> | 5.54 | $4.08 \times 10^{-9}$ |
| rs9676969   | 19 | 13,462,117  | <i>CACNA1A</i> | 5.54 | $4.08 \times 10^{-9}$ |

|              |            |    |             |                |                              |
|--------------|------------|----|-------------|----------------|------------------------------|
|              | rs8111026  | 19 | 13,462,471  | <i>CACNA1A</i> | 5.54 4.08×10 <sup>-9</sup>   |
|              | rs8101350  | 19 | 13,462,547  | <i>CACNA1A</i> | 5.54 4.08×10 <sup>-9</sup>   |
|              | rs993464   | 19 | 13,462,969  | <i>CACNA1A</i> | 5.47 5.25×10 <sup>-9</sup>   |
|              | rs62109120 | 19 | 13,463,093  | <i>CACNA1A</i> | 5.54 4.08×10 <sup>-9</sup>   |
|              | rs62109121 | 19 | 13,463,606  | <i>CACNA1A</i> | 5.54 4.08×10 <sup>-9</sup>   |
|              | rs60160458 | 19 | 13,464,814  | <i>CACNA1A</i> | 5.54 4.08×10 <sup>-9</sup>   |
| <i>VTN</i>   | rs76410874 | 21 | 46,378,941  | <i>FAM207A</i> | 0.03 7.01×10 <sup>-9</sup>   |
| <i>YWHAB</i> | rs11225671 | 11 | 103,172,268 | <i>DYNC2H1</i> | 12.38 4.97×10 <sup>-9</sup>  |
|              | rs12362743 | 11 | 103,174,035 | <i>DYNC2H1</i> | 11.70 4.16×10 <sup>-8</sup>  |
|              | rs72975625 | 11 | 103,175,850 | <i>DYNC2H1</i> | 11.70 4.16×10 <sup>-8</sup>  |
|              | rs11225676 | 11 | 103,177,706 | <i>DYNC2H1</i> | 11.70 4.16×10 <sup>-8</sup>  |
|              | rs72975630 | 11 | 103,178,161 | <i>DYNC2H1</i> | 11.70 4.16×10 <sup>-8</sup>  |
|              | rs11225677 | 11 | 103,179,752 | <i>DYNC2H1</i> | 12.46 1.28×10 <sup>-8</sup>  |
|              | rs7937201  | 11 | 103,180,450 | <i>DYNC2H1</i> | 11.70 4.16×10 <sup>-8</sup>  |
|              | rs11225687 | 11 | 103,182,929 | <i>DYNC2H1</i> | 11.70 4.16×10 <sup>-8</sup>  |
|              | rs12366065 | 11 | 103,184,396 | <i>DYNC2H1</i> | 12.46 1.28×10 <sup>-8</sup>  |
|              | rs11225702 | 11 | 103,185,595 | <i>DYNC2H1</i> | 12.46 1.28×10 <sup>-8</sup>  |
|              | rs11225705 | 11 | 103,186,455 | <i>DYNC2H1</i> | 11.70 4.16×10 <sup>-8</sup>  |
|              | rs72975657 | 11 | 103,187,169 | <i>DYNC2H1</i> | 11.70 4.16×10 <sup>-8</sup>  |
|              | rs11225710 | 11 | 103,188,934 | <i>DYNC2H1</i> | 11.70 4.16×10 <sup>-8</sup>  |
|              | rs7936583  | 11 | 103,193,338 | <i>DYNC2H1</i> | 11.26 2.54×10 <sup>-8</sup>  |
| <i>YWHAH</i> | rs7290696  | 22 | 32,341,684  | <i>YWHAH</i>   | 4.51 4.51×10 <sup>-8</sup>   |
|              | rs7291050  | 22 | 32,341,957  | <i>YWHAH</i>   | 4.49 4.88×10 <sup>-8</sup>   |
|              | rs9606887  | 22 | 32,347,771  | <i>YWHAH</i>   | 4.50 4.80×10 <sup>-8</sup>   |
|              | rs9606888  | 22 | 32,348,513  | <i>YWHAH</i>   | 4.50 4.80×10 <sup>-8</sup>   |
|              | rs9621371  | 22 | 32,356,150  | Intergenic     | 4.50 4.80×10 <sup>-8</sup>   |
| <i>YWHAZ</i> | rs3134376  | 8  | 101,934,140 | <i>YWHAZ</i>   | -12.84 6.49×10 <sup>-9</sup> |
|              | rs3105460  | 8  | 101,937,374 | <i>YWHAZ</i>   | 13.11 4.49×10 <sup>-9</sup>  |
|              | rs964917   | 8  | 101,937,455 | <i>YWHAZ</i>   | 12.85 9.44×10 <sup>-9</sup>  |
|              | rs1376672  | 8  | 101,939,479 | <i>YWHAZ</i>   | -12.84 6.49×10 <sup>-9</sup> |
|              | rs3134380  | 8  | 101,943,319 | <i>YWHAZ</i>   | -12.84 6.49×10 <sup>-9</sup> |
|              | rs3105452  | 8  | 101,943,618 | <i>YWHAZ</i>   | -12.84 6.49×10 <sup>-9</sup> |
|              | rs3100053  | 8  | 101,944,559 | <i>YWHAZ</i>   | -12.84 6.49×10 <sup>-9</sup> |
|              | rs4734498  | 8  | 101,946,548 | <i>YWHAZ</i>   | -12.68 1.09×10 <sup>-8</sup> |
|              | rs3134353  | 8  | 101,947,453 | <i>YWHAZ</i>   | 13.11 4.49×10 <sup>-9</sup>  |
|              | rs1470764  | 8  | 101,950,038 | <i>YWHAZ</i>   | 13.11 4.49×10 <sup>-9</sup>  |
|              | rs3134356  | 8  | 101,952,506 | <i>YWHAZ</i>   | -12.81 7.88×10 <sup>-9</sup> |
|              | rs3134358  | 8  | 101,958,433 | <i>YWHAZ</i>   | 13.22 3.17×10 <sup>-9</sup>  |
|              | rs1901362  | 8  | 101,959,609 | <i>YWHAZ</i>   | -12.89 6.26×10 <sup>-9</sup> |
|              | rs983583   | 8  | 101,961,910 | <i>YWHAZ</i>   | 13.22 3.17×10 <sup>-9</sup>  |
|              | rs71506349 | 8  | 101,962,897 | <i>YWHAZ</i>   | -12.63 1.16×10 <sup>-8</sup> |
|              | rs3100052  | 8  | 101,967,139 | Intergenic     | 13.74 7.89×10 <sup>-10</sup> |
|              | rs7817485  | 8  | 101,969,528 | Intergenic     | 13.74 7.89×10 <sup>-10</sup> |
|              | rs4734500  | 8  | 101,970,119 | Intergenic     | 13.80 5.76×10 <sup>-10</sup> |
|              | rs3019275  | 8  | 101,974,450 | Intergenic     | -12.63 1.05×10 <sup>-8</sup> |
|              | rs2386921  | 8  | 101,975,378 | Intergenic     | 12.26 1.90×10 <sup>-8</sup>  |
|              | rs2386922  | 8  | 101,975,479 | Intergenic     | 12.26 1.90×10 <sup>-8</sup>  |
|              | rs2923781  | 8  | 101,976,510 | Intergenic     | 12.26 1.90×10 <sup>-8</sup>  |
|              | rs3019261  | 8  | 101,978,163 | Intergenic     | 12.34 1.48×10 <sup>-8</sup>  |

rs3019263

8 101,983,081

Intergenic

-12.76  $5.52 \times 10^{-9}$

---

Abbreviations: SNV, single-nucleotide variant.  
<sup>a</sup>bp from GRCh37.

**Table S2** Expression quantitative trait loci for two or more of the genes involved in the PI3K/AKT pathway by a genome-wide association study ( $P < 5 \times 10^{-8}$ ).

| <i>eQTL</i>              |            |                              |                     | <i>Expressed Genes</i> <sup>b</sup> |               |                           |
|--------------------------|------------|------------------------------|---------------------|-------------------------------------|---------------|---------------------------|
| <i>SNV</i>               | <i>Chr</i> | <i>Position</i> <sup>a</sup> | <i>Gene</i>         |                                     |               |                           |
| rs116248210              | 2          | 103,945,833                  | Intergenic          | <i>COL4A1</i>                       | <i>COL4A2</i> |                           |
| rs116506968              | 2          | 183,551,471                  | Intergenic          | <i>COL4A1</i>                       | <i>COL4A2</i> |                           |
| rs34845474               | 4          | 169,751,339                  | <i>PALLD</i>        | <i>COL4A1</i>                       | <i>COL4A2</i> |                           |
| rs33951557               | 6          | 81,393,482                   | Intergenic          | <i>COL4A1</i>                       | <i>COL4A2</i> |                           |
| rs55869773               | 7          | 4,498,947                    | Intergenic          | <i>COL4A1</i>                       | <i>COL4A2</i> |                           |
| rs76598348               | 9          | 7,568,139                    | Intergenic          | <i>COL4A1</i>                       | <i>COL4A2</i> |                           |
| rs1987249                | 9          | 108,683,134                  | Intergenic          | <i>COL4A1</i>                       | <i>COL4A2</i> |                           |
| rs4276755                | 9          | 124,377,411                  | <i>DAB2IP</i>       | <i>COL4A1</i>                       | <i>COL4A2</i> |                           |
| rs116674084              | 12         | 61,420,772                   | Intergenic          | <i>COL4A1</i>                       | <i>COL4A2</i> |                           |
| rs182060879              | 12         | 85,650,851                   | Intergenic          | <i>COL4A1</i>                       | <i>COL4A2</i> |                           |
| rs11867392               | 17         | 1,921,816                    | <i>RTN4RL1</i>      | <i>COL4A1</i>                       | <i>COL4A2</i> |                           |
| rs6002762                | 22         | 22,910,191                   | Intergenic          | <i>COL4A1</i>                       | <i>COL4A2</i> |                           |
| rs74617949               | 22         | 27,681,626                   | Intergenic          | <i>COL4A1</i>                       | <i>COL4A2</i> |                           |
| rs12759318               | 1          | 22,308,435                   | <i>CELA3B</i>       | <i>COL4A5</i>                       | <i>COL4A6</i> |                           |
| rs2506992                | 1          | 48,097,805                   | Intergenic          | <i>COL4A5</i>                       | <i>COL4A6</i> |                           |
| rs17019582               | 2          | 4,702,434                    | <i>LINC01249</i>    | <i>COL4A5</i>                       | <i>COL4A6</i> |                           |
| rs72992248               | 2          | 231,197,652                  | <i>SP140L</i>       | <i>COL4A5</i>                       | <i>COL4A6</i> |                           |
| rs72766225               | 5          | 63,042,657                   | Intergenic          | <i>COL4A5</i>                       | <i>COL4A6</i> |                           |
| rs17545761               | 5          | 146,647,488                  | <i>STK32A</i>       | <i>COL4A5</i>                       | <i>COL4A6</i> |                           |
| rs78851618               | 6          | 147,047,296                  | <i>ADGB</i>         | <i>COL4A5</i>                       | <i>COL4A6</i> |                           |
| rs16871986               | 7          | 105,399,650                  | <i>ATXN7L1</i>      | <i>COL4A5</i>                       | <i>COL4A6</i> | <i>KITLG</i>              |
| rs117766049              | 7          | 129,684,199                  | <i>ZC3HC1</i>       | <i>COL4A5</i>                       | <i>COL4A6</i> |                           |
| rs117417471              | 10         | 56,973,794                   | Intergenic          | <i>COL4A5</i>                       | <i>COL4A6</i> | <i>F2R</i>                |
| rs7121626                | 11         | 5,379,516                    | <i>OR51B5</i>       | <i>COL4A5</i>                       | <i>COL4A6</i> |                           |
| rs7964807 <sup>c</sup>   | 12         | 74,484,387                   | Intergenic          | <i>COL4A5</i>                       | <i>COL4A6</i> |                           |
| rs189351960 <sup>c</sup> | 12         | 74,560,964                   | <i>LOC100507377</i> | <i>COL4A5</i>                       | <i>COL4A6</i> |                           |
| rs117219682              | 14         | 59,558,654                   | Intergenic          | <i>COL4A5</i>                       | <i>COL4A6</i> |                           |
| rs72721031               | 14         | 68,012,909                   | <i>PLEKHH1</i>      | <i>COL4A5</i>                       | <i>COL4A6</i> |                           |
| rs7165046                | 15         | 97,778,882                   | Intergenic          | <i>COL4A5</i>                       | <i>COL4A6</i> |                           |
| rs3784843                | 16         | 62,003,873                   | <i>CDH8</i>         | <i>COL4A5</i>                       | <i>COL4A6</i> |                           |
| rs7226068                | 17         | 17,231,431                   | <i>NT5M</i>         | <i>COL4A5</i>                       | <i>COL4A6</i> |                           |
| rs6474703                | 9          | 12,336,801                   | Intergenic          |                                     | <i>COL4A6</i> | <i>KITLG</i>              |
| rs75927735               | 15         | 86,169,103                   | <i>AKAP13</i>       | <i>CDKN1A</i>                       |               | <i>F2R</i>                |
| rs2226155                | 1          | 113,865,778                  | Intergenic          | <i>COL1A1</i>                       |               | <i>GHR</i>                |
| rs73024503               | 6          | 162,326,020                  | <i>PARK2</i>        | <i>COL1A1</i>                       |               | <i>GHR</i>                |
| rs142713725              | 13         | 88,877,310                   | Intergenic          | <i>COL1A1</i>                       |               | <i>GHR</i>                |
| rs75782643               | 14         | 90,785,989                   | <i>NRDE2</i>        | <i>COL1A1</i>                       |               | <i>GHR</i>                |
| rs181029676              | 17         | 64,558,223                   | <i>PRKCA</i>        | <i>COL1A1</i> <sup>cis</sup>        |               | <i>GHR</i>                |
| rs7532303                | 1          | 44,864,049                   | Intergenic          |                                     | <i>ITGA11</i> | <i>GHR</i>                |
| rs142534849              | 1          | 181,041,664                  | Intergenic          |                                     | <i>ITGA11</i> | <i>GHR</i>                |
| rs62152138               | 2          | 103,324,335                  | <i>SLC9A2</i>       |                                     | <i>ITGA11</i> | <i>GHR</i>                |
| rs73246227               | 5          | 117,457,849                  | <i>LOC102467224</i> |                                     | <i>ITGA11</i> | <i>GHR</i> <sup>cis</sup> |
| rs111934886              | 6          | 14,339,896                   | Intergenic          |                                     | <i>ITGA11</i> | <i>GHR</i>                |
| rs62446904               | 7          | 30,754,538                   | Intergenic          |                                     | <i>ITGA11</i> | <i>GHR</i>                |
| rs74657816               | 7          | 46,670,682                   | Intergenic          |                                     | <i>ITGA11</i> | <i>GHR</i>                |
| rs7917505                | 10         | 70,974,481                   | Intergenic          |                                     | <i>ITGA11</i> | <i>GHR</i>                |

|             |    |             |                 |                              |               |            |              |
|-------------|----|-------------|-----------------|------------------------------|---------------|------------|--------------|
| rs72798056  | 16 | 50,184,574  | Intergenic      |                              | <i>ITGA11</i> | <i>GHR</i> |              |
| rs112716132 | 22 | 27,463,211  | Intergenic      |                              | <i>ITGA11</i> | <i>GHR</i> |              |
| rs79442714  | 1  | 113,833,382 | Intergenic      | <i>COL1A1</i>                | <i>ITGA11</i> | <i>GHR</i> |              |
| rs55932807  | 4  | 90,753,339  | <i>SNCA</i>     | <i>COL1A1</i>                | <i>ITGA11</i> |            |              |
| rs115973927 | 4  | 181,655,290 | Intergenic      |                              | <i>ITGA11</i> | <i>GHR</i> |              |
| rs76821212  | 6  | 165,921,617 | <i>PDE10A</i>   |                              | <i>ITGA11</i> | <i>GHR</i> |              |
| rs112981873 | 8  | 74,798,939  | Intergenic      | <i>COL1A1</i>                |               | <i>GHR</i> |              |
| rs6006621   | 22 | 44,419,407  | <i>PARVB</i>    |                              | <i>ITGA11</i> | <i>GHR</i> |              |
| rs13147782  | 4  | 131,034,260 | Intergenic      | <i>COL1A1</i>                | <i>ITGA11</i> | <i>GHR</i> | <i>PDGFA</i> |
| rs150483042 | 3  | 90,431,083  | Intergenic      | <i>COL1A1</i>                | <i>ITGA11</i> |            |              |
| rs13128743  | 4  | 7,301,089   | <i>SORCS2</i>   | <i>COL1A1</i>                | <i>ITGA11</i> |            |              |
| rs189724000 | 4  | 129,628,727 | Intergenic      | <i>COL1A1</i>                | <i>ITGA11</i> |            |              |
| rs116135844 | 4  | 168,179,343 | Intergenic      | <i>COL1A1</i>                | <i>ITGA11</i> |            |              |
| rs190065357 | 10 | 134,951,797 | Intergenic      | <i>COL1A1</i>                | <i>ITGA11</i> |            |              |
| rs72658018  | 13 | 113,230,049 | <i>TUBGCP3</i>  | <i>COL1A1</i>                | <i>ITGA11</i> |            |              |
| rs192073405 | 17 | 69,639,501  | Intergenic      | <i>COL1A1</i> <sup>cis</sup> | <i>ITGA11</i> |            |              |
| rs34419428  | 20 | 61,288,015  | <i>SLCO4A1</i>  | <i>COL1A1</i>                | <i>ITGA11</i> |            |              |
| rs67897587  | 12 | 13,293,153  | Intergenic      | <i>COL1A1</i>                | <i>ITGA11</i> |            | <i>LAMB3</i> |
| rs10823526  | 10 | 72,115,475  | <i>LRRC20</i>   |                              |               | <i>GHR</i> | <i>LAMC2</i> |
| rs45450199  | 10 | 72,182,110  | <i>EIF4EBP2</i> |                              |               | <i>GHR</i> | <i>LAMC2</i> |
| rs74769936  | 6  | 47,322,096  | Intergenic      | <i>FNI</i>                   | <i>LAMA1</i>  |            |              |
| rs17339635  | 10 | 14,487,154  | Intergenic      | <i>FNI</i>                   | <i>MET</i>    |            |              |

Abbreviations: eQTL, expression quantitative locus; SNV, single-nucleotide variant.

<sup>a</sup>bp from GRCh37.

<sup>b</sup>The superscript 'cis' indicates cis-regulation. No superscript shows trans-regulation.

<sup>c</sup>The rs7964807 and rs189351960 were identified at one association signal. At the signal, rs7964807 was the most significant variant associated with expression of *COL4A5*, and rs189351960 was the most significant variant associated with expression of *COL4A6*.

**Table S3** Functional regulation annotation for nucleotide variants associated with gene expression of *COL4A1* and *COL4A2* using RegulomeDB.

| <i>SNV</i>  | <i>Chr</i> | <i>Position</i> <sup>a</sup> | <i>Score</i> <sup>b</sup> | <i>Regulatory annotation</i> <sup>c</sup>                         |
|-------------|------------|------------------------------|---------------------------|-------------------------------------------------------------------|
| rs145692667 | 22         | 22,900,983                   | 2b                        | Transcription factor binding+any motif+DNase footprint+DNase peak |
| rs2073725   | 22         | 22,891,307                   | 3a                        | Transcription factor binding+any motif+DNase peak                 |
| rs12628694  | 22         | 22,905,692                   | 3a                        | Transcription factor binding+any motif+DNase peak                 |
| rs4820469   | 22         | 22,911,059                   | 3a                        | Transcription factor binding+any motif+DNase peak                 |
| rs33951557  | 6          | 81,393,481                   | 3a                        | Transcription factor binding+any motif+DNase peak                 |
| rs11867392  | 17         | 1,921,815                    | 4                         | Transcription factor binding+DNase peak                           |
| rs8405      | 22         | 22,890,269                   | 4                         | Transcription factor binding+DNase peak                           |
| rs5996169   | 22         | 22,907,729                   | 4                         | Transcription factor binding+DNase peak                           |
| rs78256678  | 7          | 140,156,722                  | 4                         | Transcription factor binding+DNase peak                           |
| rs3747098   | 22         | 22,890,065                   | 5                         | Transcription factor binding or DNase peak                        |
| rs35317486  | 22         | 22,902,727                   | 5                         | Transcription factor binding or DNase peak                        |
| rs57306165  | 22         | 22,902,758                   | 5                         | Transcription factor binding or DNase peak                        |
| rs62225994  | 22         | 22,902,782                   | 5                         | Transcription factor binding or DNase peak                        |
| rs34575077  | 22         | 22,902,828                   | 5                         | Transcription factor binding or DNase peak                        |
| rs2266993   | 22         | 22,903,464                   | 5                         | Transcription factor binding or DNase peak                        |
| rs12628336  | 22         | 22,904,505                   | 5                         | Transcription factor binding or DNase peak                        |
| rs12628961  | 22         | 22,905,573                   | 5                         | Transcription factor binding or DNase peak                        |
| rs12628728  | 22         | 22,905,591                   | 5                         | Transcription factor binding or DNase peak                        |
| rs12628708  | 22         | 22,905,785                   | 5                         | Transcription factor binding or DNase peak                        |
| rs35340611  | 22         | 22,906,059                   | 5                         | Transcription factor binding or DNase peak                        |
| rs4822132   | 22         | 22,906,900                   | 5                         | Transcription factor binding or DNase peak                        |
| rs12484127  | 22         | 22,907,617                   | 5                         | Transcription factor binding or DNase peak                        |
| rs6002751   | 22         | 22,909,311                   | 5                         | Transcription factor binding or DNase peak                        |
| rs11705416  | 22         | 22,909,403                   | 5                         | Transcription factor binding or DNase peak                        |
| rs11704554  | 22         | 22,909,423                   | 5                         | Transcription factor binding or DNase peak                        |
| rs57882020  | 22         | 22,909,635                   | 5                         | Transcription factor binding or DNase peak                        |
| rs6002757   | 22         | 22,909,962                   | 5                         | Transcription factor binding or DNase peak                        |
| rs6002758   | 22         | 22,909,980                   | 5                         | Transcription factor binding or DNase peak                        |
| rs6002759   | 22         | 22,909,982                   | 5                         | Transcription factor binding or DNase peak                        |
| rs13218634  | 6          | 81,392,644                   | 5                         | Transcription factor binding or DNase peak                        |
| rs34570868  | 6          | 81,399,463                   | 5                         | Transcription factor binding or DNase peak                        |
| rs55869773  | 7          | 4,498,946                    | 5                         | Transcription factor binding or DNase peak                        |
| rs1987249   | 9          | 108,683,133                  | 5                         | Transcription factor binding or DNase peak                        |
| rs13293907  | 9          | 108,702,985                  | 5                         | Transcription factor binding or DNase peak                        |
| rs4276755   | 9          | 124,377,410                  | 5                         | Transcription factor binding or DNase peak                        |
| rs182060879 | 12         | 85,650,850                   | 6                         | Motif hit                                                         |
| rs28692543  | 17         | 79,904,306                   | 6                         | Motif hit                                                         |
| rs5996147   | 22         | 22,898,674                   | 6                         | Motif hit                                                         |
| rs2266994   | 22         | 22,903,479                   | 6                         | Motif hit                                                         |
| rs3827308   | 22         | 22,904,029                   | 6                         | Motif hit                                                         |
| rs11090146  | 22         | 22,904,801                   | 6                         | Motif hit                                                         |
| rs12484407  | 22         | 22,905,029                   | 6                         | Motif hit                                                         |

|             |    |             |   |           |
|-------------|----|-------------|---|-----------|
| rs34159908  | 22 | 22,905,978  | 6 | Motif hit |
| rs4822130   | 22 | 22,906,390  | 6 | Motif hit |
| rs4822131   | 22 | 22,906,528  | 6 | Motif hit |
| rs4822137   | 22 | 22,910,272  | 6 | Motif hit |
| rs4822138   | 22 | 22,910,415  | 6 | Motif hit |
| rs6002779   | 22 | 22,912,889  | 6 | Motif hit |
| rs34845474  | 4  | 169,751,338 | 6 | Motif hit |
| rs141374855 | 6  | 81,394,817  | 6 | Motif hit |
| rs76886693  | 6  | 81,396,606  | 6 | Motif hit |
| rs12003625  | 9  | 108,702,801 | 6 | Motif hit |
| rs116674084 | 12 | 61,420,771  | 7 | No Data   |
| rs2266991   | 22 | 22,902,951  | 7 | No Data   |
| rs3827312   | 22 | 22,904,142  | 7 | No Data   |
| rs3827313   | 22 | 22,904,149  | 7 | No Data   |
| rs12484878  | 22 | 22,905,094  | 7 | No Data   |
| rs12628637  | 22 | 22,905,882  | 7 | No Data   |
| rs6002761   | 22 | 22,910,144  | 7 | No Data   |
| rs6002762   | 22 | 22,910,190  | 7 | No Data   |
| rs4822139   | 22 | 22,910,522  | 7 | No Data   |
| rs4820467   | 22 | 22,910,530  | 7 | No Data   |
| rs4820468   | 22 | 22,910,673  | 7 | No Data   |
| rs6002772   | 22 | 22,911,548  | 7 | No Data   |
| rs6002778   | 22 | 22,912,167  | 7 | No Data   |
| rs4822154   | 22 | 22,913,628  | 7 | No Data   |
| rs62226018  | 22 | 22,914,299  | 7 | No Data   |
| rs74617949  | 22 | 27,681,625  | 7 | No Data   |
| rs116248210 | 2  | 103,945,832 | 7 | No Data   |
| rs113126958 | 2  | 134,065,881 | 7 | No Data   |
| rs116506968 | 2  | 183,551,470 | 7 | No Data   |
| rs76024614  | 4  | 169,745,499 | 7 | No Data   |
| rs12001361  | 9  | 108,684,544 | 7 | No Data   |
| rs13292657  | 9  | 108,703,074 | 7 | No Data   |
| rs76598348  | 9  | 7,568,138   | 7 | No Data   |
| rs76060026  | 9  | 7,568,567   | 7 | No Data   |

---

Abbreviations: SNV, single-nucleotide variant

<sup>a</sup>bp from GRCh37.

<sup>b</sup>Lower score indicates more evidence for a variant to be functional.

<sup>c</sup>Regulation was annotated based on the Encyclopedia of DNA Elements (ENCODE) data.

**Table S4** Functional regulation annotation for nucleotide variants associated with gene expression of *COL4A5* and *COL4A6* using RegulomeDB.

| <i>SNV</i>  | <i>Chr</i> | <i>Position</i> <sup>a</sup> | <i>Score</i> <sup>b</sup> | <i>Regulatory annotation</i> <sup>c</sup>                         |
|-------------|------------|------------------------------|---------------------------|-------------------------------------------------------------------|
| rs7165046   | 15         | 97,778,881                   | 2b                        | Transcription factor binding+any motif+DNase Footprint+DNase peak |
| rs75617695  | 12         | 74,460,438                   | 3a                        | Transcription factor binding+any motif+DNase peak                 |
| rs112931164 | 9          | 140,294,495                  | 3a                        | Transcription factor binding+any motif+DNase peak                 |
| rs78649901  | 5          | 146,675,509                  | 4                         | Transcription factor binding+DNase peak                           |
| rs75819971  | 11         | 123,347,707                  | 5                         | Transcription factor binding or DNase peak                        |
| rs80351845  | 12         | 74,476,821                   | 5                         | Transcription factor binding or DNase peak                        |
| rs61196665  | 16         | 62,004,511                   | 5                         | Transcription factor binding or DNase peak                        |
| rs56391958  | 16         | 62,005,708                   | 5                         | Transcription factor binding or DNase peak                        |
| rs55973238  | 16         | 62,009,664                   | 5                         | Transcription factor binding or DNase peak                        |
| rs2506992   | 1          | 48,097,804                   | 5                         | Transcription factor binding or DNase peak                        |
| rs73154681  | 22         | 31,236,542                   | 5                         | Transcription factor binding or DNase peak                        |
| rs72992248  | 2          | 231,197,651                  | 5                         | Transcription factor binding or DNase peak                        |
| rs17019595  | 2          | 4,704,140                    | 5                         | Transcription factor binding or DNase peak                        |
| rs57543595  | 5          | 146,650,913                  | 5                         | Transcription factor binding or DNase peak                        |
| rs17468085  | 5          | 146,655,510                  | 5                         | Transcription factor binding or DNase peak                        |
| rs75926181  | 5          | 146,657,498                  | 5                         | Transcription factor binding or DNase peak                        |
| rs115884442 | 5          | 146,660,023                  | 5                         | Transcription factor binding or DNase peak                        |
| rs80343345  | 5          | 146,660,757                  | 5                         | Transcription factor binding or DNase peak                        |
| rs74374168  | 5          | 146,675,453                  | 5                         | Transcription factor binding or DNase peak                        |
| rs78851618  | 6          | 147,047,295                  | 5                         | Transcription factor binding or DNase peak                        |
| rs16871986  | 7          | 105,399,649                  | 5                         | Transcription factor binding or DNase peak                        |
| rs11764066  | 7          | 129,694,737                  | 5                         | Transcription factor binding or DNase peak                        |
| rs117417471 | 10         | 56,973,793                   | 6                         | Motif hit                                                         |
| rs7121626   | 11         | 5,379,515                    | 6                         | Motif hit                                                         |
| rs117888950 | 12         | 74,131,739                   | 6                         | Motif hit                                                         |
| rs77097711  | 12         | 74,348,618                   | 6                         | Motif hit                                                         |
| rs7954064   | 12         | 74,460,018                   | 6                         | Motif hit                                                         |
| rs117898983 | 12         | 74,467,395                   | 6                         | Motif hit                                                         |
| rs117866772 | 12         | 74,481,377                   | 6                         | Motif hit                                                         |
| rs7964807   | 12         | 74,484,386                   | 6                         | Motif hit                                                         |
| rs151196400 | 12         | 74,486,749                   | 6                         | Motif hit                                                         |
| rs117957068 | 12         | 74,491,626                   | 6                         | Motif hit                                                         |
| rs2365426   | 12         | 74,492,567                   | 6                         | Motif hit                                                         |
| rs7959349   | 12         | 74,495,387                   | 6                         | Motif hit                                                         |
| rs12320777  | 12         | 74,510,144                   | 6                         | Motif hit                                                         |
| rs77573113  | 12         | 74,512,139                   | 6                         | Motif hit                                                         |
| rs2049205   | 12         | 74,514,938                   | 6                         | Motif hit                                                         |
| rs78966406  | 12         | 74,532,288                   | 6                         | Motif hit                                                         |
| rs78321472  | 12         | 74,533,994                   | 6                         | Motif hit                                                         |
| rs116882385 | 12         | 74,543,794                   | 6                         | Motif hit                                                         |
| rs7972328   | 12         | 74,570,626                   | 6                         | Motif hit                                                         |
| rs117679796 | 12         | 74,583,322                   | 6                         | Motif hit                                                         |



|             |    |             |   |           |
|-------------|----|-------------|---|-----------|
| rs139746544 | 12 | 74,583,645  | 6 | Motif hit |
| rs192929004 | 12 | 80,701,465  | 6 | Motif hit |
| rs117219682 | 14 | 59,558,653  | 6 | Motif hit |
| rs1510164   | 16 | 62,011,416  | 6 | Motif hit |
| rs7226068   | 17 | 17,231,430  | 6 | Motif hit |
| rs56070607  | 5  | 146,651,083 | 6 | Motif hit |
| rs55778516  | 5  | 146,651,129 | 6 | Motif hit |
| rs77652165  | 5  | 146,652,470 | 6 | Motif hit |
| rs73794372  | 5  | 146,652,848 | 6 | Motif hit |
| rs76535160  | 5  | 146,654,317 | 6 | Motif hit |
| rs114514147 | 5  | 146,665,168 | 6 | Motif hit |
| rs79220773  | 5  | 146,677,173 | 6 | Motif hit |
| rs16930808  | 11 | 5,451,093   | 7 | No Data   |
| rs7297672   | 12 | 74,130,230  | 7 | No Data   |
| rs74479492  | 12 | 74,442,419  | 7 | No Data   |
| rs79308023  | 12 | 74,449,370  | 7 | No Data   |
| rs74690482  | 12 | 74,466,909  | 7 | No Data   |
| rs139034977 | 12 | 74,467,904  | 7 | No Data   |
| rs10506704  | 12 | 74,472,785  | 7 | No Data   |
| rs7965039   | 12 | 74,484,535  | 7 | No Data   |
| rs2365428   | 12 | 74,488,718  | 7 | No Data   |
| rs116975431 | 12 | 74,489,763  | 7 | No Data   |
| rs75478957  | 12 | 74,493,554  | 7 | No Data   |
| rs76640917  | 12 | 74,495,005  | 7 | No Data   |
| rs80090951  | 12 | 74,510,975  | 7 | No Data   |
| rs7960444   | 12 | 74,513,150  | 7 | No Data   |
| rs7306803   | 12 | 74,521,218  | 7 | No Data   |
| rs116887184 | 12 | 74,523,218  | 7 | No Data   |
| rs75674568  | 12 | 74,525,778  | 7 | No Data   |
| rs17768585  | 12 | 74,545,303  | 7 | No Data   |
| rs116929977 | 12 | 74,555,635  | 7 | No Data   |
| rs1522125   | 12 | 74,556,764  | 7 | No Data   |
| rs189351960 | 12 | 74,560,963  | 7 | No Data   |
| rs78736553  | 12 | 74,574,219  | 7 | No Data   |
| rs78088641  | 12 | 74,580,925  | 7 | No Data   |
| rs77620106  | 12 | 74,592,297  | 7 | No Data   |
| rs76881855  | 12 | 74,600,041  | 7 | No Data   |
| rs77504227  | 12 | 74,624,664  | 7 | No Data   |
| rs72721031  | 14 | 68,012,908  | 7 | No Data   |
| rs66704776  | 16 | 62,002,462  | 7 | No Data   |
| rs16964108  | 16 | 62,003,447  | 7 | No Data   |
| rs3784843   | 16 | 62,003,872  | 7 | No Data   |
| rs16964118  | 16 | 62,009,482  | 7 | No Data   |
| rs1397133   | 16 | 62,009,910  | 7 | No Data   |
| rs12759318  | 1  | 22,308,434  | 7 | No Data   |
| rs17019582  | 2  | 4,702,433   | 7 | No Data   |

|             |   |             |   |         |
|-------------|---|-------------|---|---------|
| rs17545761  | 5 | 146,647,487 | 7 | No Data |
| rs73794346  | 5 | 146,647,972 | 7 | No Data |
| rs141016113 | 5 | 146,662,214 | 7 | No Data |
| rs116480535 | 5 | 146,664,188 | 7 | No Data |
| rs114316116 | 5 | 146,673,484 | 7 | No Data |
| rs78772082  | 5 | 146,674,761 | 7 | No Data |
| rs74991998  | 5 | 146,676,066 | 7 | No Data |
| rs79541136  | 5 | 146,677,739 | 7 | No Data |
| rs72766225  | 5 | 63,042,656  | 7 | No Data |
| rs117766049 | 7 | 129,684,198 | 7 | No Data |

---

Abbreviations: SNV, single-nucleotide variant

<sup>a</sup>bp from GRCh37.

<sup>b</sup>Lower score indicates more evidence for a variant to be functional.

<sup>c</sup>Regulation was annotated based on the Encyclopedia of DNA Elements (ENCODE) data.

**Table S5** Epistasis between nucleotide variants associated with gene expression of *COL4A1* and *COL4A2* ( $P < 2.16 \times 10^{-4}$ ).

| <i>SNV 1</i> |            | <i>SNV 2</i> |            | <i>COL4A1</i> |                        | <i>COL4A2</i> |                         |
|--------------|------------|--------------|------------|---------------|------------------------|---------------|-------------------------|
| <i>ID</i>    | <i>Chr</i> | <i>ID</i>    | <i>Chr</i> | $\beta$       | <i>P</i>               | $\beta$       | <i>P</i>                |
| rs116248210  | 2          | rs116506968  | 2          | 0.39          | $7.36 \times 10^{-83}$ | 1.20          | $4.76 \times 10^{-162}$ |
| rs116248210  | 2          | rs141398405  | 3          | 0.31          | $1.39 \times 10^{-34}$ | 1.07          | $2.49 \times 10^{-76}$  |
| rs116248210  | 2          | rs150938622  | 4          | 0.40          | $3.94 \times 10^{-62}$ | 1.36          | $7.62 \times 10^{-213}$ |
| rs116248210  | 2          | rs34845474   | 4          | 0.38          | $7.85 \times 10^{-54}$ | 1.31          | $3.41 \times 10^{-168}$ |
| rs116248210  | 2          | rs55926606   | 5          | 0.38          | $1.52 \times 10^{-59}$ | 1.23          | $9.46 \times 10^{-136}$ |
| rs116248210  | 2          | rs185142701  | 6          | 0.38          | $9.51 \times 10^{-55}$ | 1.20          | $9.81 \times 10^{-114}$ |
| rs116248210  | 2          | rs33951557   | 6          | 0.33          | $4.08 \times 10^{-37}$ | 1.19          | $1.41 \times 10^{-114}$ |
| rs116248210  | 2          | rs190578649  | 7          | 0.37          | $1.58 \times 10^{-52}$ | 1.22          | $4.59 \times 10^{-128}$ |
| rs116248210  | 2          | rs55869773   | 7          | 0.37          | $4.15 \times 10^{-53}$ | 1.29          | $4.84 \times 10^{-167}$ |
| rs116248210  | 2          | rs188696513  | 8          | 0.41          | $1.73 \times 10^{-89}$ | 1.27          | $1.86 \times 10^{-214}$ |
| rs116248210  | 2          | rs185444096  | 9          | 0.38          | $7.49 \times 10^{-63}$ | 1.23          | $6.79 \times 10^{-148}$ |
| rs116248210  | 2          | rs76598348   | 9          | 0.38          | $2.00 \times 10^{-64}$ | 1.22          | $5.84 \times 10^{-155}$ |
| rs116506968  | 2          | rs34845474   | 4          | 0.30          | $5.95 \times 10^{-37}$ | 0.93          | $1.67 \times 10^{-59}$  |
| rs116506968  | 2          | rs55926606   | 5          | 0.31          | $2.50 \times 10^{-41}$ | 1.03          | $2.67 \times 10^{-86}$  |
| rs116506968  | 2          | rs185142701  | 6          | 0.32          | $5.62 \times 10^{-44}$ | 1.06          | $3.61 \times 10^{-92}$  |
| rs116506968  | 2          | rs33951557   | 6          | 0.34          | $1.17 \times 10^{-58}$ | 1.04          | $5.73 \times 10^{-92}$  |
| rs116506968  | 2          | rs190578649  | 7          | 0.37          | $5.52 \times 10^{-67}$ | 1.14          | $1.14 \times 10^{-121}$ |
| rs116506968  | 2          | rs55869773   | 7          | 0.33          | $3.46 \times 10^{-49}$ | 1.06          | $7.62 \times 10^{-100}$ |
| rs116506968  | 2          | rs188696513  | 8          | 0.33          | $2.92 \times 10^{-54}$ | 1.02          | $1.71 \times 10^{-88}$  |
| rs116506968  | 2          | rs185444096  | 9          | 0.28          | $1.17 \times 10^{-32}$ | 0.90          | $1.09 \times 10^{-58}$  |
| rs116506968  | 2          | rs76598348   | 9          | 0.29          | $3.59 \times 10^{-61}$ | 0.82          | $7.89 \times 10^{-71}$  |
| rs116506968  | 2          | rs1987249    | 9          | 0.33          | $3.63 \times 10^{-81}$ | 0.92          | $2.26 \times 10^{-90}$  |
| rs116506968  | 2          | rs4276755    | 9          | 0.32          | $4.06 \times 10^{-76}$ | 0.89          | $1.42 \times 10^{-87}$  |
| rs34845474   | 4          | rs33951557   | 6          | 0.31          | $8.40 \times 10^{-30}$ | 1.14          | $8.61 \times 10^{-85}$  |
| rs34845474   | 4          | rs190578649  | 7          | 0.32          | $1.86 \times 10^{-33}$ | 1.18          | $1.32 \times 10^{-97}$  |
| rs34845474   | 4          | rs55869773   | 7          | 0.31          | $5.33 \times 10^{-35}$ | 1.06          | $4.82 \times 10^{-72}$  |
| rs34845474   | 4          | rs188696513  | 8          | 0.41          | $1.05 \times 10^{-67}$ | 1.33          | $1.07 \times 10^{-181}$ |
| rs34845474   | 4          | rs185444096  | 9          | 0.37          | $9.36 \times 10^{-48}$ | 1.30          | $4.44 \times 10^{-167}$ |
| rs34845474   | 4          | rs76598348   | 9          | 0.40          | $3.41 \times 10^{-64}$ | 1.31          | $8.49 \times 10^{-171}$ |
| rs34845474   | 4          | rs1987249    | 9          | 0.36          | $3.32 \times 10^{-46}$ | 1.30          | $4.65 \times 10^{-163}$ |
| rs34845474   | 4          | rs4276755    | 9          | 0.34          | $1.09 \times 10^{-48}$ | 1.09          | $1.09 \times 10^{-105}$ |
| rs34845474   | 4          | rs187110906  | 10         | 0.40          | $1.19 \times 10^{-68}$ | 1.26          | $1.75 \times 10^{-160}$ |
| rs34845474   | 4          | rs77848728   | 11         | 0.37          | $4.57 \times 10^{-59}$ | 1.19          | $3.78 \times 10^{-132}$ |
| rs33951557   | 6          | rs55869773   | 7          | 0.35          | $4.11 \times 10^{-41}$ | 1.24          | $6.52 \times 10^{-119}$ |
| rs33951557   | 6          | rs188696513  | 8          | 0.34          | $5.91 \times 10^{-41}$ | 1.17          | $8.80 \times 10^{-104}$ |

|             |    |             |    |      |                        |      |                         |
|-------------|----|-------------|----|------|------------------------|------|-------------------------|
| rs33951557  | 6  | rs185444096 | 9  | 0.36 | $4.49 \times 10^{-44}$ | 1.29 | $5.20 \times 10^{-151}$ |
| rs33951557  | 6  | rs76598348  | 9  | 0.34 | $9.53 \times 10^{-40}$ | 1.21 | $7.31 \times 10^{-114}$ |
| rs33951557  | 6  | rs1987249   | 9  | 0.33 | $4.06 \times 10^{-35}$ | 1.19 | $1.21 \times 10^{-105}$ |
| rs33951557  | 6  | rs4276755   | 9  | 0.36 | $1.24 \times 10^{-44}$ | 1.22 | $9.13 \times 10^{-120}$ |
| rs33951557  | 6  | rs187110906 | 10 | 0.36 | $1.12 \times 10^{-54}$ | 1.14 | $8.50 \times 10^{-110}$ |
| rs33951557  | 6  | rs77848728  | 11 | 0.38 | $5.02 \times 10^{-60}$ | 1.23 | $7.82 \times 10^{-137}$ |
| rs33951557  | 6  | rs145907000 | 12 | 0.38 | $2.86 \times 10^{-62}$ | 1.21 | $1.73 \times 10^{-141}$ |
| rs55869773  | 7  | rs76598348  | 9  | 0.33 | $9.53 \times 10^{-39}$ | 1.23 | $1.13 \times 10^{-129}$ |
| rs55869773  | 7  | rs1987249   | 9  | 0.33 | $1.34 \times 10^{-36}$ | 1.19 | $6.15 \times 10^{-105}$ |
| rs55869773  | 7  | rs4276755   | 9  | 0.40 | $2.79 \times 10^{-59}$ | 1.39 | $1.86 \times 10^{-237}$ |
| rs55869773  | 7  | rs187110906 | 10 | 0.36 | $1.03 \times 10^{-47}$ | 1.27 | $1.45 \times 10^{-144}$ |
| rs55869773  | 7  | rs77848728  | 11 | 0.39 | $7.53 \times 10^{-58}$ | 1.35 | $8.95 \times 10^{-204}$ |
| rs55869773  | 7  | rs145907000 | 12 | 0.34 | $1.19 \times 10^{-50}$ | 1.06 | $1.04 \times 10^{-90}$  |
| rs55869773  | 7  | rs116674084 | 12 | 0.40 | $3.93 \times 10^{-70}$ | 1.28 | $8.88 \times 10^{-173}$ |
| rs55869773  | 7  | rs182060879 | 12 | 0.39 | $3.54 \times 10^{-70}$ | 1.21 | $1.68 \times 10^{-143}$ |
| rs76598348  | 9  | rs1987249   | 9  | 0.36 | $1.49 \times 10^{-52}$ | 1.23 | $3.58 \times 10^{-133}$ |
| rs76598348  | 9  | rs4276755   | 9  | 0.29 | $8.27 \times 10^{-32}$ | 1.04 | $2.37 \times 10^{-81}$  |
| rs76598348  | 9  | rs187110906 | 10 | 0.36 | $2.94 \times 10^{-51}$ | 1.21 | $1.12 \times 10^{-128}$ |
| rs76598348  | 9  | rs77848728  | 11 | 0.34 | $1.06 \times 10^{-42}$ | 1.18 | $7.01 \times 10^{-115}$ |
| rs76598348  | 9  | rs145907000 | 12 | 0.26 | $1.42 \times 10^{-28}$ | 0.89 | $3.30 \times 10^{-55}$  |
| rs76598348  | 9  | rs116674084 | 12 | 0.38 | $1.02 \times 10^{-65}$ | 1.24 | $1.80 \times 10^{-161}$ |
| rs76598348  | 9  | rs182060879 | 12 | 0.35 | $7.09 \times 10^{-54}$ | 1.15 | $3.51 \times 10^{-122}$ |
| rs1987249   | 9  | rs4276755   | 9  | 0.34 | $7.08 \times 10^{-39}$ | 1.22 | $3.77 \times 10^{-123}$ |
| rs1987249   | 9  | rs187110906 | 10 | 0.34 | $1.31 \times 10^{-43}$ | 1.09 | $9.76 \times 10^{-88}$  |
| rs1987249   | 9  | rs77848728  | 11 | 0.34 | $4.79 \times 10^{-39}$ | 1.21 | $1.92 \times 10^{-118}$ |
| rs1987249   | 9  | rs145907000 | 12 | 0.33 | $2.98 \times 10^{-43}$ | 1.09 | $7.94 \times 10^{-95}$  |
| rs1987249   | 9  | rs116674084 | 12 | 0.39 | $6.01 \times 10^{-67}$ | 1.25 | $1.95 \times 10^{-155}$ |
| rs1987249   | 9  | rs182060879 | 12 | 0.39 | $8.20 \times 10^{-70}$ | 1.23 | $4.97 \times 10^{-158}$ |
| rs4276755   | 9  | rs116674084 | 12 | 0.33 | $1.22 \times 10^{-38}$ | 1.18 | $5.96 \times 10^{-112}$ |
| rs4276755   | 9  | rs182060879 | 12 | 0.32 | $2.98 \times 10^{-36}$ | 1.12 | $5.45 \times 10^{-97}$  |
| rs4276755   | 9  | rs181615907 | 13 | 0.29 | $2.73 \times 10^{-35}$ | 0.94 | $1.22 \times 10^{-64}$  |
| rs4276755   | 9  | rs141219139 | 14 | 0.41 | $3.84 \times 10^{-79}$ | 1.28 | $6.23 \times 10^{-194}$ |
| rs4276755   | 9  | rs185218318 | 15 | 0.36 | $1.05 \times 10^{-53}$ | 1.15 | $5.40 \times 10^{-117}$ |
| rs116674084 | 12 | rs182060879 | 12 | 0.30 | $1.17 \times 10^{-31}$ | 1.07 | $1.09 \times 10^{-83}$  |
| rs116674084 | 12 | rs181615907 | 13 | 0.39 | $6.38 \times 10^{-77}$ | 1.26 | $5.66 \times 10^{-198}$ |
| rs116674084 | 12 | rs141219139 | 14 | 0.36 | $1.72 \times 10^{-54}$ | 1.19 | $6.69 \times 10^{-128}$ |
| rs116674084 | 12 | rs185218318 | 15 | 0.36 | $1.23 \times 10^{-56}$ | 1.13 | $5.37 \times 10^{-111}$ |
| rs182060879 | 12 | rs11867392  | 17 | 0.33 | $5.85 \times 10^{-48}$ | 1.07 | $1.03 \times 10^{-98}$  |
| rs182060879 | 12 | rs112067749 | 18 | 0.38 | $8.68 \times 10^{-62}$ | 1.22 | $3.69 \times 10^{-144}$ |

|             |    |            |    |      |                        |      |                        |
|-------------|----|------------|----|------|------------------------|------|------------------------|
| rs182060879 | 12 | rs56182540 | 19 | 0.32 | $5.39 \times 10^{-40}$ | 1.01 | $2.68 \times 10^{-73}$ |
| rs11867392  | 17 | rs6002762  | 22 | 0.34 | $2.05 \times 10^{-78}$ | 0.91 | $2.08 \times 10^{-86}$ |
| rs11867392  | 17 | rs74617949 | 22 | 0.34 | $3.90 \times 10^{-87}$ | 0.92 | $2.21 \times 10^{-95}$ |
| rs6002762   | 22 | rs74617949 | 22 | 0.35 | $1.03 \times 10^{-83}$ | 0.94 | $9.36 \times 10^{-90}$ |

---

**Table S6** Epistasis between nucleotide variants associated with gene expression of *COL4A5* and *COL4A6* ( $P < 2.16 \times 10^{-4}$ ).

| <i>SNV 1</i> |            | <i>SNV 2</i> |            | <i>COL4A5</i> |                         | <i>COL4A6</i> |                         |
|--------------|------------|--------------|------------|---------------|-------------------------|---------------|-------------------------|
| <i>ID</i>    | <i>Chr</i> | <i>ID</i>    | <i>Chr</i> | $\beta$       | <i>P</i>                | $\beta$       | <i>P</i>                |
| rs12759318   | 1          | rs2506992    | 1          | 1.21          | $1.33 \times 10^{-86}$  | 0.32          | $1.06 \times 10^{-74}$  |
| rs12759318   | 1          | rs149483862  | 2          | 1.35          | $1.25 \times 10^{-178}$ | 0.33          | $6.88 \times 10^{-90}$  |
| rs12759318   | 1          | rs17019582   | 2          | 1.36          | $5.50 \times 10^{-132}$ | 0.35          | $1.85 \times 10^{-95}$  |
| rs12759318   | 1          | rs72992248   | 2          | 1.25          | $4.00 \times 10^{-101}$ | 0.33          | $1.04 \times 10^{-81}$  |
| rs12759318   | 1          | rs141398405  | 3          | 1.04          | $1.46 \times 10^{-62}$  | 0.30          | $1.08 \times 10^{-82}$  |
| rs12759318   | 1          | rs150938622  | 4          | 0.93          | $2.27 \times 10^{-39}$  | 0.26          | $2.99 \times 10^{-40}$  |
| rs12759318   | 1          | rs55926606   | 5          | 1.16          | $1.65 \times 10^{-85}$  | 0.30          | $7.55 \times 10^{-74}$  |
| rs12759318   | 1          | rs72766225   | 5          | 1.12          | $1.88 \times 10^{-76}$  | 0.33          | $6.35 \times 10^{-105}$ |
| rs12759318   | 1          | rs17545761   | 5          | 1.07          | $3.20 \times 10^{-52}$  | 0.31          | $6.26 \times 10^{-70}$  |
| rs12759318   | 1          | rs185142701  | 6          | 1.15          | $1.77 \times 10^{-69}$  | 0.32          | $2.17 \times 10^{-75}$  |
| rs12759318   | 1          | rs78851618   | 6          | 1.14          | $1.82 \times 10^{-67}$  | 0.32          | $2.84 \times 10^{-70}$  |
| rs12759318   | 1          | rs190578649  | 7          | 1.11          | $2.24 \times 10^{-60}$  | 0.30          | $2.61 \times 10^{-62}$  |
| rs12759318   | 1          | rs16871986   | 7          | 1.31          | $1.12 \times 10^{-118}$ | 0.36          | $7.63 \times 10^{-123}$ |
| rs12759318   | 1          | rs117766049  | 7          | 1.24          | $1.98 \times 10^{-103}$ | 0.35          | $7.25 \times 10^{-111}$ |
| rs12759318   | 1          | rs188696513  | 8          | 1.19          | $4.26 \times 10^{-81}$  | 0.31          | $1.36 \times 10^{-70}$  |
| rs12759318   | 1          | rs185444096  | 9          | 1.16          | $4.09 \times 10^{-84}$  | 0.31          | $9.78 \times 10^{-76}$  |
| rs12759318   | 1          | rs187110906  | 10         | 1.14          | $5.28 \times 10^{-72}$  | 0.29          | $6.01 \times 10^{-58}$  |
| rs2506992    | 1          | rs17019582   | 2          | 1.23          | $9.77 \times 10^{-97}$  | 0.32          | $3.56 \times 10^{-62}$  |
| rs2506992    | 1          | rs72992248   | 2          | 1.23          | $4.11 \times 10^{-82}$  | 0.34          | $1.18 \times 10^{-72}$  |
| rs2506992    | 1          | rs141398405  | 3          | 1.21          | $2.09 \times 10^{-80}$  | 0.34          | $1.47 \times 10^{-74}$  |
| rs2506992    | 1          | rs150938622  | 4          | 1.19          | $7.48 \times 10^{-84}$  | 0.32          | $1.86 \times 10^{-73}$  |
| rs2506992    | 1          | rs55926606   | 5          | 1.16          | $2.26 \times 10^{-63}$  | 0.35          | $1.15 \times 10^{-77}$  |
| rs2506992    | 1          | rs72766225   | 5          | 1.10          | $1.09 \times 10^{-62}$  | 0.29          | $1.05 \times 10^{-51}$  |
| rs2506992    | 1          | rs17545761   | 5          | 1.06          | $1.75 \times 10^{-58}$  | 0.27          | $4.16 \times 10^{-45}$  |
| rs2506992    | 1          | rs185142701  | 6          | 1.01          | $6.93 \times 10^{-42}$  | 0.30          | $6.12 \times 10^{-51}$  |
| rs2506992    | 1          | rs78851618   | 6          | 1.27          | $1.46 \times 10^{-93}$  | 0.34          | $2.03 \times 10^{-74}$  |
| rs2506992    | 1          | rs190578649  | 7          | 1.01          | $1.41 \times 10^{-43}$  | 0.29          | $3.37 \times 10^{-47}$  |
| rs2506992    | 1          | rs16871986   | 7          | 1.01          | $3.87 \times 10^{-42}$  | 0.29          | $9.65 \times 10^{-48}$  |
| rs2506992    | 1          | rs117766049  | 7          | 1.34          | $1.28 \times 10^{-117}$ | 0.35          | $1.68 \times 10^{-87}$  |
| rs2506992    | 1          | rs188696513  | 8          | 1.30          | $1.45 \times 10^{-110}$ | 0.34          | $8.22 \times 10^{-83}$  |
| rs2506992    | 1          | rs185444096  | 9          | 1.18          | $2.06 \times 10^{-71}$  | 0.33          | $6.97 \times 10^{-66}$  |
| rs2506992    | 1          | rs187110906  | 10         | 1.07          | $1.79 \times 10^{-62}$  | 0.29          | $3.04 \times 10^{-54}$  |
| rs2506992    | 1          | rs117417471  | 10         | 1.26          | $1.27 \times 10^{-94}$  | 0.33          | $1.59 \times 10^{-74}$  |
| rs17019582   | 2          | rs72992248   | 2          | 1.20          | $4.54 \times 10^{-83}$  | 0.30          | $1.08 \times 10^{-54}$  |
| rs17019582   | 2          | rs141398405  | 3          | 1.33          | $3.27 \times 10^{-149}$ | 0.35          | $1.24 \times 10^{-89}$  |

|            |   |             |    |      |                         |      |                         |
|------------|---|-------------|----|------|-------------------------|------|-------------------------|
| rs17019582 | 2 | rs150938622 | 4  | 1.19 | $4.12 \times 10^{-99}$  | 0.29 | $4.79 \times 10^{-59}$  |
| rs17019582 | 2 | rs55926606  | 5  | 1.18 | $1.50 \times 10^{-69}$  | 0.36 | $1.02 \times 10^{-88}$  |
| rs17019582 | 2 | rs72766225  | 5  | 1.21 | $3.06 \times 10^{-101}$ | 0.31 | $5.90 \times 10^{-68}$  |
| rs17019582 | 2 | rs17545761  | 5  | 1.26 | $2.98 \times 10^{-123}$ | 0.31 | $5.20 \times 10^{-74}$  |
| rs17019582 | 2 | rs185142701 | 6  | 1.07 | $2.77 \times 10^{-51}$  | 0.31 | $2.92 \times 10^{-58}$  |
| rs17019582 | 2 | rs78851618  | 6  | 1.27 | $2.72 \times 10^{-111}$ | 0.32 | $1.46 \times 10^{-65}$  |
| rs17019582 | 2 | rs190578649 | 7  | 1.05 | $1.38 \times 10^{-50}$  | 0.32 | $3.54 \times 10^{-64}$  |
| rs17019582 | 2 | rs16871986  | 7  | 1.12 | $3.41 \times 10^{-59}$  | 0.34 | $4.96 \times 10^{-72}$  |
| rs17019582 | 2 | rs117766049 | 7  | 1.33 | $1.85 \times 10^{-145}$ | 0.34 | $2.27 \times 10^{-89}$  |
| rs17019582 | 2 | rs188696513 | 8  | 1.42 | $1.29 \times 10^{-233}$ | 0.36 | $5.20 \times 10^{-111}$ |
| rs17019582 | 2 | rs185444096 | 9  | 1.35 | $6.47 \times 10^{-153}$ | 0.34 | $3.75 \times 10^{-85}$  |
| rs17019582 | 2 | rs187110906 | 10 | 1.20 | $5.05 \times 10^{-96}$  | 0.31 | $2.93 \times 10^{-67}$  |
| rs17019582 | 2 | rs117417471 | 10 | 1.29 | $2.14 \times 10^{-129}$ | 0.33 | $1.08 \times 10^{-76}$  |
| rs72992248 | 2 | rs72766225  | 5  | 1.28 | $2.91 \times 10^{-96}$  | 0.34 | $1.98 \times 10^{-80}$  |
| rs72992248 | 2 | rs17545761  | 5  | 1.27 | $1.02 \times 10^{-107}$ | 0.33 | $5.76 \times 10^{-79}$  |
| rs72992248 | 2 | rs185142701 | 6  | 1.10 | $1.18 \times 10^{-54}$  | 0.34 | $1.05 \times 10^{-71}$  |
| rs72992248 | 2 | rs78851618  | 6  | 1.13 | $9.22 \times 10^{-69}$  | 0.29 | $3.08 \times 10^{-52}$  |
| rs72992248 | 2 | rs190578649 | 7  | 1.18 | $4.40 \times 10^{-78}$  | 0.30 | $4.62 \times 10^{-62}$  |
| rs72992248 | 2 | rs16871986  | 7  | 1.06 | $2.85 \times 10^{-47}$  | 0.31 | $7.62 \times 10^{-59}$  |
| rs72992248 | 2 | rs117766049 | 7  | 1.34 | $1.69 \times 10^{-115}$ | 0.35 | $3.87 \times 10^{-88}$  |
| rs72992248 | 2 | rs188696513 | 8  | 0.88 | $1.20 \times 10^{-31}$  | 0.27 | $1.05 \times 10^{-41}$  |
| rs72992248 | 2 | rs185444096 | 9  | 1.05 | $2.38 \times 10^{-47}$  | 0.31 | $7.41 \times 10^{-61}$  |
| rs72992248 | 2 | rs187110906 | 10 | 1.27 | $1.17 \times 10^{-92}$  | 0.34 | $8.78 \times 10^{-81}$  |
| rs72992248 | 2 | rs117417471 | 10 | 1.03 | $1.33 \times 10^{-53}$  | 0.28 | $8.27 \times 10^{-49}$  |
| rs72992248 | 2 | rs77848728  | 11 | 1.25 | $1.73 \times 10^{-87}$  | 0.33 | $2.79 \times 10^{-68}$  |
| rs72992248 | 2 | rs7121626   | 11 | 1.01 | $1.68 \times 10^{-51}$  | 0.27 | $6.51 \times 10^{-44}$  |
| rs72992248 | 2 | rs145907000 | 12 | 1.21 | $6.99 \times 10^{-80}$  | 0.34 | $3.29 \times 10^{-83}$  |
| rs72766225 | 5 | rs17545761  | 5  | 1.21 | $2.54 \times 10^{-90}$  | 0.32 | $2.20 \times 10^{-76}$  |
| rs72766225 | 5 | rs185142701 | 6  | 1.04 | $2.55 \times 10^{-47}$  | 0.32 | $1.90 \times 10^{-62}$  |
| rs72766225 | 5 | rs78851618  | 6  | 1.04 | $3.92 \times 10^{-56}$  | 0.28 | $8.27 \times 10^{-49}$  |
| rs72766225 | 5 | rs190578649 | 7  | 1.28 | $6.58 \times 10^{-112}$ | 0.34 | $2.37 \times 10^{-90}$  |
| rs72766225 | 5 | rs16871986  | 7  | 1.18 | $3.58 \times 10^{-67}$  | 0.34 | $3.53 \times 10^{-78}$  |
| rs72766225 | 5 | rs117766049 | 7  | 1.18 | $5.28 \times 10^{-72}$  | 0.32 | $4.79 \times 10^{-62}$  |
| rs72766225 | 5 | rs188696513 | 8  | 1.00 | $5.19 \times 10^{-47}$  | 0.30 | $7.88 \times 10^{-57}$  |
| rs72766225 | 5 | rs185444096 | 9  | 1.02 | $1.85 \times 10^{-47}$  | 0.30 | $1.09 \times 10^{-54}$  |
| rs72766225 | 5 | rs187110906 | 10 | 1.37 | $1.18 \times 10^{-131}$ | 0.36 | $6.58 \times 10^{-98}$  |
| rs72766225 | 5 | rs117417471 | 10 | 1.37 | $2.99 \times 10^{-137}$ | 0.36 | $1.36 \times 10^{-104}$ |
| rs72766225 | 5 | rs77848728  | 11 | 1.26 | $8.49 \times 10^{-92}$  | 0.33 | $6.11 \times 10^{-71}$  |
| rs72766225 | 5 | rs7121626   | 11 | 0.85 | $4.24 \times 10^{-34}$  | 0.22 | $1.99 \times 10^{-29}$  |

|             |   |             |    |      |                         |      |                         |
|-------------|---|-------------|----|------|-------------------------|------|-------------------------|
| rs72766225  | 5 | rs145907000 | 12 | 1.25 | $3.86 \times 10^{-95}$  | 0.32 | $1.22 \times 10^{-67}$  |
| rs17545761  | 5 | rs78851618  | 6  | 1.01 | $2.69 \times 10^{-46}$  | 0.29 | $6.43 \times 10^{-53}$  |
| rs17545761  | 5 | rs190578649 | 7  | 1.11 | $3.38 \times 10^{-82}$  | 0.32 | $7.39 \times 10^{-103}$ |
| rs17545761  | 5 | rs16871986  | 7  | 0.77 | $2.32 \times 10^{-40}$  | 0.26 | $4.75 \times 10^{-83}$  |
| rs17545761  | 5 | rs117766049 | 7  | 0.98 | $8.37 \times 10^{-46}$  | 0.32 | $1.29 \times 10^{-84}$  |
| rs17545761  | 5 | rs188696513 | 8  | 1.14 | $1.06 \times 10^{-80}$  | 0.34 | $1.14 \times 10^{-108}$ |
| rs17545761  | 5 | rs185444096 | 9  | 1.20 | $3.26 \times 10^{-81}$  | 0.34 | $2.32 \times 10^{-88}$  |
| rs17545761  | 5 | rs187110906 | 10 | 1.15 | $1.11 \times 10^{-69}$  | 0.32 | $3.34 \times 10^{-76}$  |
| rs17545761  | 5 | rs117417471 | 10 | 1.17 | $2.62 \times 10^{-87}$  | 0.35 | $5.93 \times 10^{-128}$ |
| rs17545761  | 5 | rs77848728  | 11 | 1.13 | $5.14 \times 10^{-83}$  | 0.33 | $1.14 \times 10^{-111}$ |
| rs17545761  | 5 | rs7121626   | 11 | 1.08 | $5.91 \times 10^{-59}$  | 0.28 | $7.07 \times 10^{-52}$  |
| rs17545761  | 5 | rs145907000 | 12 | 1.20 | $2.45 \times 10^{-110}$ | 0.35 | $2.51 \times 10^{-152}$ |
| rs17545761  | 5 | rs7964807   | 12 | 1.14 | $5.90 \times 10^{-77}$  | 0.29 | $1.19 \times 10^{-60}$  |
| rs78851618  | 6 | rs16871986  | 7  | 0.95 | $4.76 \times 10^{-39}$  | 0.28 | $6.52 \times 10^{-46}$  |
| rs78851618  | 6 | rs117766049 | 7  | 0.96 | $3.41 \times 10^{-42}$  | 0.27 | $4.15 \times 10^{-45}$  |
| rs78851618  | 6 | rs188696513 | 8  | 1.19 | $3.21 \times 10^{-68}$  | 0.35 | $2.41 \times 10^{-83}$  |
| rs78851618  | 6 | rs185444096 | 9  | 1.05 | $5.47 \times 10^{-47}$  | 0.31 | $1.39 \times 10^{-54}$  |
| rs78851618  | 6 | rs187110906 | 10 | 1.12 | $2.53 \times 10^{-58}$  | 0.33 | $2.48 \times 10^{-68}$  |
| rs78851618  | 6 | rs117417471 | 10 | 1.10 | $2.49 \times 10^{-53}$  | 0.33 | $1.09 \times 10^{-70}$  |
| rs78851618  | 6 | rs77848728  | 11 | 1.15 | $2.53 \times 10^{-62}$  | 0.32 | $5.67 \times 10^{-65}$  |
| rs78851618  | 6 | rs7121626   | 11 | 0.97 | $1.59 \times 10^{-42}$  | 0.29 | $4.44 \times 10^{-50}$  |
| rs78851618  | 6 | rs145907000 | 12 | 1.07 | $3.91 \times 10^{-49}$  | 0.32 | $2.22 \times 10^{-58}$  |
| rs78851618  | 6 | rs7964807   | 12 | 1.04 | $5.13 \times 10^{-49}$  | 0.30 | $5.60 \times 10^{-56}$  |
| rs78851618  | 6 | rs189351960 | 12 | 1.18 | $1.14 \times 10^{-68}$  | 0.36 | $1.10 \times 10^{-91}$  |
| rs16871986  | 7 | rs117766049 | 7  | 1.06 | $7.19 \times 10^{-66}$  | 0.31 | $1.30 \times 10^{-84}$  |
| rs16871986  | 7 | rs188696513 | 8  | 1.14 | $4.43 \times 10^{-64}$  | 0.34 | $1.58 \times 10^{-93}$  |
| rs16871986  | 7 | rs185444096 | 9  | 1.24 | $1.33 \times 10^{-97}$  | 0.35 | $4.48 \times 10^{-109}$ |
| rs16871986  | 7 | rs187110906 | 10 | 1.02 | $6.34 \times 10^{-50}$  | 0.29 | $4.02 \times 10^{-54}$  |
| rs16871986  | 7 | rs117417471 | 10 | 1.06 | $5.58 \times 10^{-54}$  | 0.30 | $7.02 \times 10^{-58}$  |
| rs16871986  | 7 | rs77848728  | 11 | 1.23 | $1.69 \times 10^{-93}$  | 0.35 | $1.89 \times 10^{-108}$ |
| rs16871986  | 7 | rs7121626   | 11 | 1.20 | $2.28 \times 10^{-96}$  | 0.33 | $3.19 \times 10^{-94}$  |
| rs16871986  | 7 | rs145907000 | 12 | 1.23 | $1.56 \times 10^{-92}$  | 0.32 | $6.87 \times 10^{-74}$  |
| rs16871986  | 7 | rs7964807   | 12 | 0.94 | $1.86 \times 10^{-47}$  | 0.26 | $1.54 \times 10^{-50}$  |
| rs16871986  | 7 | rs189351960 | 12 | 1.14 | $3.59 \times 10^{-76}$  | 0.29 | $1.86 \times 10^{-57}$  |
| rs117766049 | 7 | rs117417471 | 10 | 1.02 | $5.44 \times 10^{-48}$  | 0.33 | $1.86 \times 10^{-89}$  |
| rs117766049 | 7 | rs77848728  | 11 | 1.12 | $1.66 \times 10^{-70}$  | 0.34 | $3.50 \times 10^{-100}$ |
| rs117766049 | 7 | rs7121626   | 11 | 1.29 | $1.02 \times 10^{-103}$ | 0.37 | $9.06 \times 10^{-124}$ |
| rs117766049 | 7 | rs145907000 | 12 | 1.30 | $8.74 \times 10^{-104}$ | 0.36 | $9.94 \times 10^{-121}$ |
| rs117766049 | 7 | rs7964807   | 12 | 1.08 | $9.54 \times 10^{-66}$  | 0.31 | $2.01 \times 10^{-84}$  |



|             |    |             |    |      |                         |      |                         |
|-------------|----|-------------|----|------|-------------------------|------|-------------------------|
| rs117766049 | 7  | rs189351960 | 12 | 1.23 | $1.42 \times 10^{-111}$ | 0.37 | $4.70 \times 10^{-182}$ |
| rs117766049 | 7  | rs181615907 | 13 | 1.07 | $1.04 \times 10^{-55}$  | 0.27 | $5.21 \times 10^{-42}$  |
| rs117766049 | 7  | rs141219139 | 14 | 1.06 | $6.51 \times 10^{-64}$  | 0.31 | $5.21 \times 10^{-81}$  |
| rs117766049 | 7  | rs117219682 | 14 | 1.05 | $1.16 \times 10^{-59}$  | 0.27 | $8.49 \times 10^{-47}$  |
| rs117417471 | 10 | rs7121626   | 11 | 1.12 | $2.20 \times 10^{-55}$  | 0.34 | $4.51 \times 10^{-80}$  |
| rs117417471 | 10 | rs145907000 | 12 | 1.27 | $3.77 \times 10^{-88}$  | 0.36 | $1.33 \times 10^{-107}$ |
| rs117417471 | 10 | rs7964807   | 12 | 1.22 | $1.74 \times 10^{-73}$  | 0.33 | $3.23 \times 10^{-76}$  |
| rs117417471 | 10 | rs189351960 | 12 | 1.15 | $5.21 \times 10^{-62}$  | 0.35 | $2.58 \times 10^{-88}$  |
| rs117417471 | 10 | rs181615907 | 13 | 1.02 | $2.03 \times 10^{-48}$  | 0.31 | $6.78 \times 10^{-69}$  |
| rs117417471 | 10 | rs141219139 | 14 | 1.01 | $3.42 \times 10^{-41}$  | 0.29 | $2.76 \times 10^{-45}$  |
| rs117417471 | 10 | rs117219682 | 14 | 0.96 | $2.13 \times 10^{-42}$  | 0.30 | $1.32 \times 10^{-63}$  |
| rs117417471 | 10 | rs72721031  | 14 | 1.09 | $4.40 \times 10^{-53}$  | 0.32 | $8.65 \times 10^{-65}$  |
| rs7121626   | 11 | rs7964807   | 12 | 1.09 | $9.66 \times 10^{-54}$  | 0.32 | $4.17 \times 10^{-64}$  |
| rs7121626   | 11 | rs189351960 | 12 | 1.16 | $2.81 \times 10^{-62}$  | 0.33 | $1.99 \times 10^{-72}$  |
| rs7121626   | 11 | rs181615907 | 13 | 1.24 | $1.92 \times 10^{-83}$  | 0.35 | $6.39 \times 10^{-89}$  |
| rs7121626   | 11 | rs141219139 | 14 | 1.21 | $4.46 \times 10^{-85}$  | 0.35 | $3.14 \times 10^{-92}$  |
| rs7121626   | 11 | rs117219682 | 14 | 1.40 | $4.44 \times 10^{-137}$ | 0.37 | $6.53 \times 10^{-104}$ |
| rs7121626   | 11 | rs72721031  | 14 | 1.25 | $3.37 \times 10^{-97}$  | 0.35 | $1.55 \times 10^{-103}$ |
| rs7121626   | 11 | rs185218318 | 15 | 1.37 | $1.94 \times 10^{-133}$ | 0.36 | $3.28 \times 10^{-99}$  |
| rs7964807   | 12 | rs189351960 | 12 | 1.18 | $1.14 \times 10^{-28}$  | 0.37 | $2.53 \times 10^{-39}$  |
| rs7964807   | 12 | rs181615907 | 13 | 1.14 | $8.33 \times 10^{-61}$  | 0.33 | $3.54 \times 10^{-72}$  |
| rs7964807   | 12 | rs141219139 | 14 | 1.00 | $2.93 \times 10^{-46}$  | 0.29 | $3.20 \times 10^{-49}$  |
| rs7964807   | 12 | rs117219682 | 14 | 1.11 | $1.62 \times 10^{-55}$  | 0.32 | $5.60 \times 10^{-65}$  |
| rs7964807   | 12 | rs72721031  | 14 | 0.82 | $2.97 \times 10^{-29}$  | 0.25 | $9.45 \times 10^{-37}$  |
| rs7964807   | 12 | rs185218318 | 15 | 1.15 | $2.58 \times 10^{-67}$  | 0.35 | $1.60 \times 10^{-92}$  |
| rs189351960 | 12 | rs117219682 | 14 | 1.15 | $5.20 \times 10^{-61}$  | 0.33 | $6.59 \times 10^{-70}$  |
| rs189351960 | 12 | rs72721031  | 14 | 1.01 | $4.66 \times 10^{-45}$  | 0.29 | $6.50 \times 10^{-50}$  |
| rs189351960 | 12 | rs185218318 | 15 | 1.06 | $1.92 \times 10^{-48}$  | 0.31 | $7.55 \times 10^{-57}$  |
| rs189351960 | 12 | rs7165046   | 15 | 0.88 | $1.98 \times 10^{-34}$  | 0.26 | $3.82 \times 10^{-43}$  |
| rs189351960 | 12 | rs62028702  | 16 | 1.12 | $1.87 \times 10^{-60}$  | 0.34 | $1.32 \times 10^{-82}$  |
| rs117219682 | 14 | rs72721031  | 14 | 1.12 | $7.72 \times 10^{-71}$  | 0.32 | $3.44 \times 10^{-81}$  |
| rs117219682 | 14 | rs185218318 | 15 | 1.33 | $1.58 \times 10^{-111}$ | 0.35 | $4.36 \times 10^{-87}$  |
| rs117219682 | 14 | rs7165046   | 15 | 1.19 | $5.70 \times 10^{-80}$  | 0.34 | $4.88 \times 10^{-98}$  |
| rs117219682 | 14 | rs62028702  | 16 | 1.06 | $3.36 \times 10^{-56}$  | 0.28 | $1.15 \times 10^{-47}$  |
| rs72721031  | 14 | rs7165046   | 15 | 1.05 | $6.60 \times 10^{-56}$  | 0.28 | $2.63 \times 10^{-47}$  |
| rs72721031  | 14 | rs62028702  | 16 | 1.17 | $9.79 \times 10^{-85}$  | 0.33 | $4.90 \times 10^{-88}$  |
| rs72721031  | 14 | rs3784843   | 16 | 1.08 | $1.90 \times 10^{-64}$  | 0.29 | $1.40 \times 10^{-56}$  |
| rs7165046   | 15 | rs3784843   | 16 | 1.23 | $2.94 \times 10^{-92}$  | 0.32 | $1.06 \times 10^{-73}$  |
| rs7165046   | 15 | rs62053745  | 17 | 1.24 | $5.16 \times 10^{-88}$  | 0.33 | $1.05 \times 10^{-74}$  |

|           |    |           |    |      |                        |      |                        |
|-----------|----|-----------|----|------|------------------------|------|------------------------|
| rs3784843 | 16 | rs7226068 | 17 | 1.01 | $4.39 \times 10^{-53}$ | 0.26 | $4.73 \times 10^{-43}$ |
|-----------|----|-----------|----|------|------------------------|------|------------------------|

---
